# Supplementary material for: The scale and evolutionary significance of horizontal gene transfer in the choanoflagellate Monosiga brevicollis
Source: PubMed Central journal article supplement (PMC4046809; doi:10.1186/1471-2164-14-729), 2013-10-25
Supplement: 12864_2012_5464_MOESM1_ESM.pdf [file 12864_2012_5464_MOESM1_ESM.pdf]

# The scale and evolutionary significance of horizontal gene transfer in the choanoflagellate *Monosiga brevicollis*

Jipei Yue      Guiling Sun    Xiangyang Hu      Jinling Huang

**Table S1.** Algal and prokaryotic genes (405) identified in *Monosiga*. “^” indicates genes that were reported by earlier studies. Asterisks indicate genes that were detected in our other studies. “+” indicates genes that have homologs in another choanoflagellate *Salpingoeca rosetta*, which implies that the gene transfer may have occurred prior to the divergence of *Monosiga* and *Salpingoeca*. “y” indicates that the transferred gene has no homologs in *Monosiga* and should be gene addition to *Monosiga* genome. “~” indicates that the genes have at least one intron.

| Gene product                         | Putative Donor             | Putative Function       | Gi Number | Introns | Gene addition | Homologs in <i>Salpingoeca</i> |
|--------------------------------------|----------------------------|-------------------------|-----------|---------|---------------|--------------------------------|
| 1,4-alpha-glucan branching enzyme    | Bacteria                   | Carbohydrate metabolism | 167534449 | ~       |               | +                              |
| 6-phosphogluconolactonase^           | Haptophytes/Diatoms        | Carbohydrate metabolism | 167536559 | ~       |               | +                              |
| Alcohol dehydrogenase                | Algae                      | Carbohydrate Metabolism | 167526433 | ~       |               |                                |
| Aldehyde reductase                   | Pelagophytes               | Carbohydrate Metabolism | 167519881 | ~       |               | +                              |
| Aldo-keto reductase^                 | Chromalveolates            | Carbohydrate metabolism | 167522481 | ~       |               | +                              |
| Alpha-galactosidase^                 | Chromalveolates            | Carbohydrate metabolism | 167519278 | ~       |               |                                |
| Alpha-galactosidase^                 | Dinoflagellates            | Carbohydrate metabolism | 167535848 | ~       |               | +                              |
| Alpha-galactosidase^                 | Land plants                | Carbohydrate metabolism | 167518688 | ~       |               |                                |
| Alpha-galactosidase^                 | Pelagophytes               | Carbohydrate metabolism | 167521790 | ~       |               |                                |
| Alpha-glucosidase                    | Haptophytes                | Carbohydrate metabolism | 167536698 | ~       |               |                                |
| Alpha-L-rhamnosidase                 | Bacteria                   | Carbohydrate metabolism | 167538489 | ~       |               |                                |
| Alpha-N-arabinofuranosidase^         | Haptophytes                | Carbohydrate metabolism | 167533923 | ~       | y             |                                |
| Alpha-rhamnosidase                   | Bacteroidetes              | Carbohydrate metabolism | 167524457 | ~       |               |                                |
| Alpha-rhamnosidase^                  | Haptophytes                | Carbohydrate metabolism | 167524427 | ~       |               | +                              |
| Alpha-rhamnosidase                   | Haptophytes                | Carbohydrate metabolism | 167533764 | ~       |               |                                |
| Alpha-xylosidase                     | Bacteria                   | Carbohydrate metabolism | 167536377 | ~       |               |                                |
| Beta-galactosidase                   | Haptophytes                | Carbohydrate metabolism | 167525643 |         |               |                                |
| Beta-glucanase^                      | Pelagophytes               | Carbohydrate metabolism | 167524340 |         |               |                                |
| Beta-glucanase                       | Pelagophytes               | Carbohydrate metabolism | 167520023 | ~       |               |                                |
| Beta-glucosidase^                    | Chromists                  | Carbohydrate metabolism | 167537541 | ~       |               | +                              |
| Beta-glucosidase^                    | Haptophytes                | Carbohydrate Metabolism | 167522437 | ~       |               | +                              |
| beta-mannosidase                     | Chromists                  | Carbohydrate metabolism | 167523877 | ~       |               | +                              |
| beta-mannosidase                     | Chromists                  | Carbohydrate metabolism | 167522846 | ~       |               | +                              |
| Beta-xylosidase^                     | Diatoms                    | Carbohydrate metabolism | 167517889 |         |               | +                              |
| Beta-xylosidase^                     | Haptophytes/Pelagophytes   | Carbohydrate metabolism | 167534300 | ~       |               |                                |
| D-beta-hydroxybutyrate dehydrogenase | Bacteria                   | Carbohydrate metabolism | 167519457 | ~       |               | +                              |
| D-galactarate dehydratase^           | Haptophytes/Bacteria       | Carbohydrate metabolism | 167535312 | ~       | y             | +                              |
| Exo-beta-1,3-glucanase               | Haptophytes                | Carbohydrate metabolism | 167538294 | ~       |               |                                |
| Galactokinase                        | Pelagophytes               | Carbohydrate Metabolism | 167535085 | ~       |               |                                |
| Glucookinase                         | Chromists                  | Carbohydrate Metabolism | 167537338 | ~       | y             | +                              |
| Gluconolactonase                     | Planctomycetes             | Carbohydrate metabolism | 167523807 | ~       |               | +                              |
| Glycerol-3-phosphate dehydrogenase^  | Land plants                | Carbohydrate metabolism | 167523371 | ~       | y             | +                              |
| Glycoside hydrolase                  | Bacteria                   | Carbohydrate metabolism | 167524467 | ~       | y             |                                |
| Glycoside hydrolase                  | Chlamydiae/Verrucomicrobia | Carbohydrate metabolism | 167516874 | ~       |               |                                |
| Glycoside hydrolase                  | Bacteria                   | Carbohydrate metabolism | 167525759 | ~       |               | +                              |
| Glycoside hydrolase                  | Bacteria                   | Carbohydrate metabolism | 167537858 | ~       |               |                                |
| Glycoside hydrolase                  | Verrucomicrobia            | Carbohydrate metabolism | 167524693 | ~       |               |                                |

|                                                              |                          |                                  |           |   |   |   |
|--------------------------------------------------------------|--------------------------|----------------------------------|-----------|---|---|---|
| Glycoside hydrolase                                          | Bacteria                 | Carbohydrate metabolism          | 167525968 | ~ |   |   |
| Glycosyl hydrolase                                           | Bacteria                 | Carbohydrate metabolism          | 167525723 | ~ |   |   |
| Glycosyl hydrolase^                                          | Haptophytes/Pelagophytes | Carbohydrate metabolism          | 167518261 | ~ |   | + |
| Glycosyl hydrolase^                                          | Dinoflagellates          | Carbohydrate metabolism          | 167522924 | ~ |   |   |
| Glycosyl hydrolase^                                          | Haptophytes              | Carbohydrate metabolism          | 167535834 | ~ |   |   |
| Glycosyl hydrolase^*                                         | Haptophytes              | Carbohydrate metabolism          | 167535902 | ~ |   | + |
| Glycosyl hydrolase^                                          | Pelagophytes             | Carbohydrate metabolism          | 167517467 | ~ |   |   |
| Glycosyl hydrolases^                                         | Haptophytes              | Carbohydrate metabolism          | 167520276 | ~ |   | + |
| Heparinase II/III family protein^                            | Cyanobacteria            | Carbohydrate metabolism          | 167516594 | ~ | y |   |
| Hexosaminidase^                                              | Pelagophytes             | Carbohydrate metabolism          | 167521882 | ~ |   | + |
| Maltodextrin glucosidase                                     | Gamma-proteobacteria     | Carbohydrate metabolism          | 167521117 | ~ |   | + |
| Mannitol-1-phosphate/altronate dehydrogenase                 | Alpha-proteobacteria     | Carbohydrate metabolism          | 167537946 |   | y |   |
| Mannonate dehydratase                                        | Prokaryotes              | Carbohydrate metabolism          | 167524749 |   | y | + |
| Mannonate dehydratase                                        | Prokaryotes              | Carbohydrate metabolism          | 167525781 | ~ |   | + |
| Phosphoenolpyruvate carboxykinase                            | Bacteria                 | Carbohydrate metabolism          | 167519713 | ~ | y | + |
| Xylosidase^                                                  | Chromists                | Carbohydrate metabolism          | 167521708 | ~ |   | + |
| Pirin-related protein                                        | Algae                    | Carbohydrate metabolism          | 167538121 | ~ |   | + |
| Dolichol phosphate mannose synthase                          | Dinoflagellates          | Carbohydrate metabolism          | 167535637 | ~ |   | + |
| Prolyl 4-hydroxylase                                         | Algae                    | Carbohydrate metabolism          | 167524906 | ~ |   | + |
| Pectin acetyltransferase^                                    | Haptophytes              | Pectin degradation               | 167523529 | ~ |   | + |
| Polygalacturonase^                                           | Haptophytes/Diatoms      | Pectin degradation               | 167521455 | ~ |   | + |
| Polygalacturonase^                                           | Algae                    | Pectin degradation               | 167536801 | ~ | y |   |
| Polygalacturonase                                            | Algae                    | Pectin degradation               | 167519459 | ~ | y |   |
| Polygalacturonase                                            | Algae                    | Pectin degradation               | 167521385 | ~ |   |   |
| Polygalacturonase^                                           | Land plants              | Pectin degradation               | 167523647 | ~ |   |   |
| Aspartate-semialdehyde dehydrogenase^                        | Algae                    | Amino acid biosynthesis          | 167527123 | ~ | y | + |
| Bifunctional aspartate kinase/diaminopimelate decarboxylase^ | Bacteria                 | Amino acid biosynthesis          | 167524549 | ~ |   | + |
| D-Alanine aminotransferase^                                  | Diatoms                  | Amino acid biosynthesis          | 167524583 | ~ |   | + |
| Diaminopimelate epimerase^                                   | Bacteria                 | Amino acid biosynthesis          | 167535696 | ~ |   |   |
| Dihydroxyacid dehydratase^*                                  | Algae                    | Amino acid biosynthesis          | 167524042 | ~ |   | + |
| Homoserine dehydrogenase^                                    | Algae                    | Amino acid biosynthesis          | 167536236 | ~ | y | + |
| Homoserine O-acetyltransferase^                              | Diatoms                  | Amino acid biosynthesis          | 167535206 | ~ |   |   |
| Amino acid aminotransferase^                                 | Algae                    | Amino acid biosynthesis          | 167535603 | ~ |   | + |
| Glutamate synthase^                                          | Green plants             | Amino acid biosynthesis          | 167519242 | ~ |   |   |
| Histidinol dehydrogenase^                                    | Chromists                | amino acid biosynthesis          | 167535912 | ~ | y | + |
| Anthranilate synthase^                                       | Chromists                | Amino acid biosynthesis          | 167538764 | ~ |   | + |
| Dihydrodipicolinate synthetase^                              | Bacteroidetes            | Amino acid biosynthesis          | 167537054 | ~ | y | + |
| 3-dehydroquinate synthase                                    | Bacteria                 | Amino acid biosynthesis          | 167537749 | ~ |   | + |
| Kynurenine aminotransferase III^                             | Algae                    | Amino acid derivative metabolism | 167521756 | ~ |   | + |
| D-amino-acid dehydrogenase                                   | Bacteria                 | Amino acid metabolism            | 167517429 |   |   | + |
| L-threonine 3-dehydrogenase                                  | Proteobacteria           | Amino acid metabolism            | 167523873 | ~ |   | + |
| Puromycin-sensitive aminopeptidase^                          | Chromalveolates          | Amino acid metabolism            | 167537006 | ~ |   | + |
| Arginase^*                                                   | Heterokonts              | Amino acid metabolism            | 167522942 | ~ | y | + |
| Glutaminase A                                                | Bacteria                 | Amino acid metabolism            | 167522419 | ~ | y |   |
| Glutamate formiminotransferase                               | Algae                    | Amino acid Metabolism            | 167523543 | ~ | y |   |
| Methylenetetrahydrofolate reductase                          | Heterokonts              | Amino acid Metabolism            | 167523328 | ~ | y | + |
| Selenide, water dikinase                                     | Bacteria/algae           | Amino acid metabolism            | 167525178 | ~ | y | + |
| Cysteine endopeptidase                                       | Green algae              | Proteolysis                      | 167537940 | ~ |   | + |
| Cysteine protease                                            | Algae                    | Proteolysis                      | 167522705 | ~ |   | + |
| Leu/Phe-tRNA protein transferase                             | Chromalveolates          | proteolysis                      | 167536799 | ~ |   | + |
| Metacaspase^                                                 | Plantae                  | Proteolysis                      | 167537374 | ~ |   |   |
| Peptidase^                                                   | Alveolates               | Proteolysis                      | 167524318 | ~ |   | + |
| Peptidase U34 dipeptidase                                    | Algae/Bacteria           | Proteolysis                      | 167524214 | ~ | y |   |
| Serine carboxypeptidase^                                     | Haptophytes/Pelagophytes | Proteolysis                      | 167534856 | ~ |   | + |
| Serine carboxypeptidase                                      | Haptophytes/Pelagophytes | Proteolysis                      | 167524356 | ~ |   | + |
| Serine carboxypeptidase                                      | Haptophytes              | Proteolysis                      | 167526595 | ~ |   | + |
| Serine carboxypeptidase                                      | Haptophytes              | Proteolysis                      | 167534702 | ~ |   | + |
| Serine carboxypeptidase                                      | Haptophytes              | Proteolysis                      | 167533602 | ~ |   | + |
| Serine carboxypeptidase                                      | Haptophytes              | Proteolysis                      | 167534625 | ~ |   | + |
| Delta-5 desaturase                                           | Pelagophytes             | Fatty acid biosynthesis          | 167518353 | ~ |   | + |
| Fatty acid desaturase^                                       | Diatoms/Green plants     | Fatty acid biosynthesis          | 167523184 | ~ |   | + |
| Fatty-acyl-CoA synthetase                                    | High GC Gram+            | Fatty acid biosynthesis          | 167516368 | ~ |   | + |

|                                                       |                      |                                            |           |   |   |   |
|-------------------------------------------------------|----------------------|--------------------------------------------|-----------|---|---|---|
| Long chainfatty acid elongation enzyme <sup>^</sup>   | Chromalveolates      | Fatty acid biosynthesis                    | 167538086 | ~ |   | + |
| Fatty acid elongase                                   | Haptophytes          | Fatty acid synthesis                       | 167526168 | ~ |   | + |
| Esterase/lipase <sup>^</sup>                          | Haptophytes          | Lipid metabolism                           | 167520997 |   |   | + |
| Acyl-CoA dehydrogenase                                | Bacteria             | Lipid metabolism                           | 167518089 | ~ |   | + |
| Methyltransferase                                     | Bacteria             | Lipid metabolism                           | 167515590 |   |   |   |
| Phosphatidate-sterol O-acyltransferase                | Algae                | Lipid metabolism                           | 167525286 | ~ |   | + |
| SAM-dependent methyltransferases                      | Bacteria             | Lipid metabolism                           | 167536306 |   |   |   |
| Apurinic/aprimidinic endonuclease                     | Chromalveolata       | DNA base excision repair                   | 167522888 | ~ |   |   |
| DNA topoisomerase VI subunit B <sup>^</sup>           | Algae                | DNA endoreduplication                      | 167519843 | ~ |   |   |
| DNA topoisomerase VI subunit A                        | Algae                | DNA endoreduplication                      | 167526605 | ~ | y |   |
| Uracil-DNA glycosylase                                | Bacteria             | DNA repair                                 | 167535167 | ~ |   | + |
| Exodeoxyribonuclease V                                | Bacteria             | DNA repair and homologous recombination    | 167537463 | ~ |   | + |
| DNA ligase D                                          | Bacteria/Algae       | DNA repair and replication                 | 167519499 | ~ | y | + |
| PHP domain protein                                    | Bacteria             | DNA repair and replication                 | 167517641 | ~ | y | + |
| DNA glycosylase <sup>^</sup>                          | Algae                | DNA replication, recombination, and repair | 167535061 |   |   |   |
| Beta-lactamase                                        | Bacteria             | response to antibiotic                     | 167536358 | ~ |   | + |
| Metallo-beta-lactamase                                | Gamma-proteobacteria | response to antibiotic                     | 167525833 |   |   | + |
| L-2,4-diaminobutyric acid acetyltransferase           | Alpha-proteobacteria | response to osmotic stress                 | 167517491 |   | y |   |
| OsmC family protein                                   | Bacteria             | response to oxidative stress               | 167519803 | ~ |   | + |
| Tellurium resistance protein                          | Bacteria/algae       | Stress response                            | 167520131 | ~ |   | + |
| Protein phosphatase 2C                                | Haptophytes          | Stress responses                           | 167522497 | ~ |   | + |
| Integral membrane protein TerC                        | Bacteria/algae       | Tellurite resistance                       | 167535450 | ~ | y | + |
| Ascorbate peroxidase <sup>^</sup>                     | Green algae          | Oxidative stress                           | 167515916 | ~ |   | + |
| Ascorbate peroxidase <sup>^</sup>                     | Algae                | Oxidative stress                           | 167521652 | ~ |   | + |
| Antioxidant, AhpC/TSA family                          | Bacteria             | Antioxidant                                | 167515776 | ~ |   |   |
| Monodehydroascorbate reductase                        | Algae                | Antioxidative response                     | 167522575 | ~ |   | + |
| Phytochelatin synthase                                | Algae/Bacteria       | heavy metal detoxification                 | 167537519 | ~ |   |   |
| Enterotoxin                                           | Bacteria             | Defense                                    | 167537376 | ~ | y | + |
| Mercuric reductase                                    | Algae/Bacteria       | Mercuric stress                            | 167519689 | ~ |   | + |
| Major facilitator superfamily <sup>^</sup>            | Diatoms              | Xenobiotic metabolism                      | 167517553 | ~ | y | + |
| Major facilitator superfamily                         | Diatoms              | Xenobiotic metabolism                      | 167523663 | ~ | y | + |
| Multidrug efflux transporter <sup>^</sup>             | Haptophytes          | Xenobiotic metabolism                      | 167520702 | ~ | y |   |
| Ribonuclease H                                        | Bacteria             |                                            | 167518678 | ~ | y |   |
| ABC transporter <sup>^</sup>                          | Green plants         | Membrane transport                         | 167522511 | ~ |   | + |
| Mitochondrial carrier family <sup>^</sup>             | Eulgenoids           | Membrane transport                         | 167521906 | ~ |   | + |
| Mitochondrial inner membrane transporter <sup>^</sup> | Haptophytes          | Membrane transport                         | 167523769 | ~ |   | + |
| Multidrug and toxin extrusion protein 1 <sup>^</sup>  | Haptophytes/Diatoms  | Multidrug antitransport                    | 167517106 | ~ |   | + |
| UDP-galactose translocator                            | Algae                | Nucleotide-sugar transporter               | 167527303 | ~ |   | + |
| ABC phosphate/phosphonate transporter                 | Bacteria             | Transporter                                | 167533969 | ~ | y |   |
| Major facilitator transporter                         | Bacteria             | Transporter                                | 167518556 |   | y |   |
| Folate/Biopterin Transporter                          | Oomycetes            | Transporter                                | 167523823 | ~ | y | + |
| Rhamnose-proton symporter                             | Bacteroidetes        | Transporter (hexose)                       | 167515428 | ~ | y | + |
| Ca <sup>2+</sup> :Cation Antiporter (CaCA) Family     | Chromists            | Transporter (ion)                          | 167516696 |   |   |   |
| CorA metal ion transporter                            | Diatoms              | Transporter (ion)                          | 167516550 | ~ | y |   |
| Flavin-containing monooxygenase                       | Bacteria             | Transporter (ion)                          | 167534098 | ~ |   |   |
| Ion channel protein                                   | Algae                | Transporter (ion)                          | 167534102 | ~ |   | + |
| Potassium inwardly-rectifying channel <sup>^</sup>    | Chromalveolates      | Transporter (ion)                          | 167515450 | ~ |   | + |
| P-type ATPase                                         | Algae                | Transporter (ion)                          | 167534304 | ~ |   | + |
| Sulphate transporter                                  | Oomycetes            | Transporter (ion)                          | 167535659 |   | y | + |
| Sulphate transporter                                  | Oomycetes            | Transporter (ion)                          | 167538557 | ~ |   | + |
| Sulphate transporter                                  | Chromists            | Transporter (ion)                          | 167534551 | ~ |   | + |
| Sulphate transporter <sup>^</sup>                     | Chromists            | Transporter (ion)                          | 167518067 | ~ | y | + |
| TrkA (Na <sup>+</sup> /H <sup>+</sup> antiporter)     | Bacteria/algae       | Transporter (ion)                          | 167526916 | ~ |   |   |
| TrkA (Na <sup>+</sup> /H <sup>+</sup> antiporter)     | Bacteria/algae       | Transporter (ion)                          | 167537773 | ~ |   |   |
| Zinc transporter ZupT <sup>^</sup>                    | Pelagophytes         | Transporter (ion)                          | 167515920 | ~ |   |   |
| Sorbitol transporter                                  | Green algae          | Transporter (sugar)                        | 167523619 | ~ |   | + |
| Sorbitol transporter <sup>^</sup>                     | Green algae          | Transporter (sugar)                        | 167521355 | ~ |   | + |
| ABC transporter                                       | Red algae            | Transporter                                | 167520081 | ~ |   | + |
| ABC transporter                                       | Red algae            | Transporter                                | 167535768 | ~ |   | + |
| ABC transporter                                       | Red algae            | Transporter                                | 167517635 | ~ |   | + |
| L-galactono-1,4-lactone                               | Algae                | Vitamin C biosynthesis                     | 167530871 | ~ |   | + |

|                                                                         |                               |                                             |           |   |   |   |
|-------------------------------------------------------------------------|-------------------------------|---------------------------------------------|-----------|---|---|---|
| dehydrogenase                                                           |                               |                                             |           |   |   |   |
| 1,4-dihydroxy-2-naphthoate octaprenyl- transferase                      | Bacteria                      | Vitamin K2 biosynthesis                     | 167519453 |   | y | + |
| Alpha-L-arabinofuranosidase                                             | Haptophytes                   | Amino sugar and nucleotide sugar metabolism | 167533053 | ~ | y |   |
| Alpha-L-arabinofuranosidase*                                            | Haptophytes                   | Amino sugar and nucleotide sugar metabolism | 167519743 | ~ | y | + |
| Asparaginyl-tRNA synthetase                                             | Green plants                  | Aminoacyl-tRNA biosynthesis                 | 167527404 | ~ |   | + |
| N-acylglucosamine 2-epimerase                                           | algae/bacteria                | Aminosugars metabolism                      | 167527127 | ~ |   |   |
| Fumarate reductase/succinate dehydrogenase                              | Planctomycetes                | Anaerobic respiration                       | 167526295 | ~ |   |   |
| Ribonuclease D                                                          | Bacteria                      | Structured RNA processing                   | 167533742 | ~ |   |   |
| Sulfatase                                                               | Haptophytes                   | Sulfate metabolism                          | 167527083 | ~ |   |   |
| Sulfotransferase                                                        | Diatoms/Green algae           | Sulfate metabolism                          | 167518043 | ~ |   | + |
| Ser/Thr protein phosphatase                                             | Chromists                     | Signal transduction pathways                | 167534824 |   | y |   |
| NUDIX hydrolase^                                                        | Diatoms                       | NUDIX hydrolysis                            | 167518355 | ~ |   | + |
| Disulfide oxidoreductase^                                               | Chromalveolates               | Cell redox homeostasis                      | 167525441 | ~ |   | + |
| Ubiquinone biosynthesis protein coq-8                                   | Algae                         | ubiquinone biosynthesis.                    | 167519152 | ~ |   | + |
| Regulatory protein CII                                                  | Bacteria                      | Cell division and chromosome partitioning   | 167534509 |   | y |   |
| Regulatory protein CII                                                  | Bacteria                      | Cell division and chromosome partitioning   | 167526174 | ~ |   |   |
| Regulatory protein CII                                                  | Haptophytes/Bacteria          | Cell division and chromosome partitioning   | 167536551 |   |   |   |
| Lysophospholipase                                                       | Bacteria/algae                | glycerophospholipid metabolism              | 167516992 | ~ | y |   |
| Iduronate-2-sulfatase                                                   | Haptophytes                   | Glycosaminoglycan degradation               | 167524240 | ~ |   | + |
| Mannosyltransferase^                                                    | Chlorarachniophytes           | Glycosphingolipid biosynthesis              | 167523914 |   |   | + |
| Methylenetetrahydrofolate dehydrogenase                                 | Heterokonts                   | Glyoxylate and dicarboxylate metabolism     | 167523990 | ~ |   |   |
| Cytochrome B561                                                         | Algae                         | Energy metabolism                           | 167516960 | ~ | y | + |
| Inorganic polyphosphate/ATP-NAD kinase                                  | Bacteria                      | Energy metabolism                           | 167516892 | ~ |   | + |
| Mitochondrial carrier protein                                           | Algae                         | Energy transfer                             | 167524336 | ~ |   | + |
| 2-nitropropane dioxygenase                                              | Alpha-proteobacteria          | nitrogen metabolism                         | 167538159 |   | y |   |
| Flavodoxin                                                              | Bacteria                      | Nitrogen metabolism                         | 167533501 | ~ | y |   |
| Isocitrate dehydrogenase (NAD+)^                                        | Haptophytes                   | Tricarboxylic acid cycle                    | 167517034 | ~ |   | + |
| Isocitrate dehydrogenase                                                | bacteria                      | Tricarboxylic acid cycle                    | 167534021 | ~ |   | + |
| Isocitrate dehydrogenase (NAD+)                                         | Bacteria                      | Tricarboxylic acid cycle                    | 167518099 | ~ |   | + |
| Sn-1,2-diacylglycerol ethanolamine-and cholinephosphotranferases (ISS)^ | Green algae                   | Phospholipid biosynthesis                   | 167537529 | ~ | y | + |
| Uroporphyrinogen III synthase/methyltransferase                         | Algae/cyanobacteria           | Porphyrin biosynthesis                      | 167515658 | ~ |   | + |
| Glutathione S-transferas                                                | proteobacteria                | Posttranslational modification              | 167523232 | ~ |   |   |
| Peptidyl-prolyl cis-trans isomerase                                     | Bacteria                      | Protein folding                             | 167527426 | ~ |   |   |
| CMP/dCMP deaminase                                                      | Gamma-proteobacteria          | nucleotide biosynthesis                     | 167538365 |   | y |   |
| 2OG-Fe(II) oxygenase                                                    | Algae                         | Unknown                                     | 167535670 |   |   | + |
| Acetyltransferase                                                       | Alpha-proteobacteria          | Unknown                                     | 167525825 |   | y |   |
| Acid ceramidase                                                         | Alveolates                    | Unknown                                     | 167517231 | ~ |   |   |
| Acid phosphatase                                                        | Algae                         | Unknown                                     | 167518307 | ~ |   | + |
| Alcohol dehydrogenase class III                                         | Haptophytes                   | Unknown                                     | 167521587 | ~ |   | + |
| Alcohol dehydrogenase class III                                         | Haptophytes                   | Unknown                                     | 167522892 | ~ |   | + |
| Aldo-ketoreductase                                                      | Algae                         | Unknown                                     | 167536740 | ~ |   | + |
| Aminoglycoside phosphotransferase                                       | Bacteria                      | Unknown                                     | 167537263 | ~ | y | + |
| Aminotransferase^                                                       | Dinoflagellates/ Green plants | Unknown                                     | 167521427 |   |   | + |
| Arylsulfatase^                                                          | Haptophytes                   | Unknown                                     | 167521718 | ~ |   |   |
| Arylsulfatase^                                                          | Chromists/bacteria            | Unknown                                     | 167524429 | ~ |   |   |
| Arylsulfatase B^                                                        | Pelagophytes                  | Unknown                                     | 167524284 | ~ |   | + |
| BNR/Asp-box repeat protein                                              | Bacteria/green algae          | Unknown                                     | 167520678 | ~ | y |   |
| Calcineurin-like phosphoesterase^                                       | Green algae                   | Unknown                                     | 167535073 | ~ |   | + |
| Cupin 2 domain-containing protein                                       | Gamma-proteobacteria          | Unknown                                     | 167527452 |   | y |   |

|                                                             |                             |         |           |   |   |   |
|-------------------------------------------------------------|-----------------------------|---------|-----------|---|---|---|
|                                                             | acteria                     |         |           |   |   |   |
| Dehydrogenase <sup>^</sup>                                  | Diatoms                     | Unknown | 167524741 | ~ |   | + |
| FAD dependent oxidoreductase <sup>^</sup>                   | Haptophytes                 | Unknown | 167525936 | ~ |   | + |
| FAD-dependent pyridine nucleotide-disulphide oxidoreductase | Alpha-proteobacteria        | Unknown | 167523218 |   |   |   |
| Glycosyl transferase                                        | Bacteria                    | Unknown | 167525785 | ~ | y |   |
| Glycosyl transferase*                                       | Bacteria                    | Unknown | 167525775 | ~ |   |   |
| Glycosyl transferase                                        | Bacteria                    | Unknown | 167525773 | ~ |   |   |
| Glycosyl transferase*                                       | Bacteria                    | Unknown | 167523096 | ~ | y |   |
| Glycosyl transferase*                                       | Bacteria                    | Unknown | 167538246 | ~ | y |   |
| Glycosyl transferase*                                       | Bacteria                    | Unknown | 167533259 | ~ |   |   |
| Glycosyl transferase*                                       | Bacteria                    | Unknown | 167530881 | ~ |   |   |
| Glycosyl transferase*                                       | Bacteria                    | Unknown | 167533829 | ~ |   |   |
| Glycosyl transferase                                        | Bacteria                    | Unknown | 167520177 | ~ | y |   |
| Glycosyl transferase*                                       | Bacteria                    | Unknown | 167523100 | ~ | y |   |
| Glycosyltransferase                                         | Delta-proteobacteria        | Unknown | 167522307 |   | y | + |
| GTP-binding protein                                         | Bacteria/algae              | Unknown | 167522240 | ~ |   |   |
| KH domain-containing protein                                | Algae                       | Unknown | 167536547 | ~ |   |   |
| Lipoprotein                                                 | Bacteria                    | Unknown | 167522473 | ~ |   |   |
| Methyltransferase                                           | Alpha-proteobacteria        | Unknown | 167535810 | ~ |   |   |
| Methyltransferase                                           | Bacteria                    | Unknown | 167538335 | ~ |   |   |
| Methyltransferase <sup>^</sup>                              | Algae/Bacteria              | Unknown | 167519769 | ~ |   |   |
| Methyltransferase                                           | Green algae                 | Unknown | 167518566 | ~ |   | + |
| Oxidoreductase                                              | Algae                       | Unknown | 167520798 | ~ |   | + |
| Oxidoreductase                                              | Algae                       | Unknown | 167538446 | ~ |   | + |
| Phospholipid scramblase <sup>^</sup>                        | Haptophytes/Pelagophytes    | Unknown | 167520670 | ~ | y |   |
| Phospholipid scramblase                                     | Haptophytes/Pelagophytes    | Unknown | 167520860 | ~ | y |   |
| SCP-like extracellular protein                              | Bacteria                    | Unknown | 167534469 | ~ |   |   |
| SCP-like extracellular protein                              | Bacteria                    | Unknown | 167524445 | ~ |   |   |
| SCP-like extracellular protein                              | Bacteria                    | Unknown | 167523453 | ~ |   | + |
| Short chain dehydrogenase/reductase <sup>^</sup>            | Algae/Bacteria              | Unknown | 167525395 | ~ |   |   |
| Short-chain dehydrogenase/reductase                         | Lentisphaera                | Unknown | 167515652 | ~ |   | + |
| Short-chain dehydrogenase/reductase SDR                     | Bacteria                    | Unknown | 167524876 |   |   |   |
| Short-chain dehydrogenase/reductase SDR                     | Bacteria                    | Unknown | 167535923 | ~ |   |   |
| Short-chain dehydrogenase                                   | Chromists                   | Unknown | 167516176 | ~ |   | + |
| Sialidase                                                   | Dinoflagellates/Haptophytes | Unknown | 167535145 | ~ |   | + |
| Sialidase                                                   | Dinoflagellates/Haptophytes | Unknown | 167534965 | ~ |   | + |
| S-layer domain protein <sup>^</sup>                         | Haptophytes                 | Unknown | 167519719 | ~ |   | + |
| Hypothetical protein                                        | Bacteria                    | Unknown | 167516190 | ~ |   |   |
| Hypothetical protein                                        | Bacteria                    | Unknown | 167516536 | ~ |   | + |
| Hypothetical protein                                        | Bacteria                    | Unknown | 167526182 | ~ |   | + |
| Hypothetical protein                                        | Bacteria                    | Unknown | 167524815 | ~ |   | + |
| Hypothetical protein                                        | Bacteria                    | Unknown | 167526184 | ~ |   | + |
| Hypothetical protein                                        | Bacteria                    | Unknown | 167524673 | ~ |   | + |
| Hypothetical protein*                                       | Bacteria                    | Unknown | 167517815 | ~ |   | + |
| Hypothetical protein                                        | Bacteria                    | Unknown | 167526357 | ~ | y | + |
| Hypothetical protein                                        | Bacteria                    | Unknown | 167517094 | ~ |   |   |
| Hypothetical protein                                        | Bacteria/algae              | Unknown | 167518634 | ~ | y |   |
| Hypothetical protein                                        | Verrucomicrobia             | Unknown | 167525024 | ~ | y |   |
| Hypothetical protein                                        | Bacteria                    | Unknown | 167518772 | ~ |   |   |
| Hypothetical protein                                        | Bacteria                    | Unknown | 167520870 | ~ |   |   |
| Hypothetical protein                                        | Bacteria                    | Unknown | 167520868 | ~ |   |   |
| Hypothetical protein                                        | Bacteria                    | Unknown | 167520872 | ~ |   |   |
| Hypothetical protein                                        | Bacteria                    | Unknown | 167516916 | ~ | y | + |
| Hypothetical protein                                        | High GC Gram+               | Unknown | 167537457 |   |   |   |
| Hypothetical protein                                        | Alpha-proteobacteria        | Unknown | 167534872 |   | y |   |
| Hypothetical protein                                        | Bacteria                    | Unknown | 167534537 |   |   |   |
| Hypothetical protein                                        | Bacteria                    | Unknown | 167536797 | ~ |   |   |
| Hypothetical protein                                        | Bacteria                    | Unknown | 167522609 | ~ |   |   |
| Hypothetical protein                                        | Delta-proteobacteria        | Unknown | 167516134 | ~ |   | + |
| Hypothetical protein                                        | Bacteria                    | Unknown | 167517251 | ~ |   |   |
| Hypothetical protein                                        | Gamma-proteobacteria        | Unknown | 167525389 | ~ | y | + |
| Hypothetical protein                                        | Cyanobacteria               | Unknown | 167525585 | ~ |   | + |

|                       |                                      |         |           |   |   |   |
|-----------------------|--------------------------------------|---------|-----------|---|---|---|
| Hypothetical protein  | Verrucomicrobia                      | Unknown | 167527348 | ~ |   |   |
| Hypothetical protein  | Delta-proteobacteria                 | Unknown | 167534158 |   | y |   |
| Hypothetical protein  | Proteobacteria                       | Unknown | 167537711 |   |   |   |
| Hypothetical protein  | Proteobacteria                       | Unknown | 167519308 |   |   |   |
| Hypothetical protein  | Bacteria                             | Unknown | 167538638 | ~ | y |   |
| Hypothetical protein  | Bacteria                             | Unknown | 167522445 | ~ | y |   |
| Hypothetical protein  | CFB group bacteria                   | Unknown | 167525577 | ~ |   | + |
| Hypothetical protein  | CFB group bacteria                   | Unknown | 167523224 | ~ |   | + |
| Hypothetical protein  | CFB group bacteria                   | Unknown | 167534971 | ~ |   | + |
| Hypothetical protein  | Bacteria                             | Unknown | 167520300 |   | y |   |
| Hypothetical protein  | Bacteria                             | Unknown | 167520392 |   |   |   |
| Hypothetical protein  | Bacteria                             | Unknown | 167519501 | ~ |   |   |
| Hypothetical protein  | Bacteria                             | Unknown | 167521820 | ~ | y | + |
| Hypothetical protein  | Bacteria                             | Unknown | 167524290 | ~ |   |   |
| Hypothetical protein  | Beta-proteobacteria/g-proteobacteria | Unknown | 167524517 | ~ |   | + |
| Hypothetical protein  | Beta-proteobacteria/g-proteobacteria | Unknown | 167527414 | ~ | y |   |
| Hypothetical protein  | Bacteria                             | Unknown | 167519801 | ~ |   |   |
| Hypothetical protein  | bacteria                             | Unknown | 167538879 | ~ |   |   |
| Hypothetical protein  | Bacteria                             | Unknown | 167522044 | ~ |   | + |
| Hypothetical protein  | Bacteria                             | Unknown | 167521780 | ~ |   | + |
| Hypothetical protein  | Bacteria                             | Unknown | 167517359 | ~ |   | + |
| Hypothetical protein  | Bacteria                             | Unknown | 167517361 |   |   | + |
| Hypothetical protein  | Bacteria                             | Unknown | 167538949 |   |   | + |
| Hypothetical protein* | Bacteria                             | Unknown | 167538877 | ~ | y |   |
| Hypothetical protein  | Bacteria                             | Unknown | 167523489 | ~ |   | + |
| Hypothetical protein* | Bacteria                             | Unknown | 167517357 | ~ |   |   |
| Hypothetical protein  | Bacteria                             | Unknown | 167519272 |   |   |   |
| Hypothetical protein  | Bacteria                             | Unknown | 167516668 | ~ | y |   |
| Hypothetical protein  | Bacteria                             | Unknown | 167521495 | ~ | y |   |
| Hypothetical protein  | Bacteria                             | Unknown | 167525407 | ~ | y | + |
| Hypothetical protein  | Bacteria                             | Unknown | 167524254 | ~ |   | + |
| Hypothetical protein  | Algae/bacteria                       | Unknown | 167525365 | ~ |   | + |
| Hypothetical protein  | Bacteria/Algae                       | Unknown | 167534180 |   |   |   |
| Hypothetical protein  | Bacteria/Algae                       | Unknown | 167520220 |   |   |   |
| Hypothetical protein  | Bacteria/Algae                       | Unknown | 167518652 |   |   |   |
| Hypothetical protein  | Bacteria/Algae                       | Unknown | 167534457 | ~ |   |   |
| Hypothetical protein  | Bacteria/algae                       | Unknown | 167524962 |   |   |   |
| Hypothetical protein  | Bacteria/algae                       | Unknown | 167515878 | ~ |   | + |
| Hypothetical protein^ | Diatoms                              | Unknown | 167524352 |   |   |   |
| Hypothetical protein^ | Haptophytes/Bacteria                 | Unknown | 167527544 | ~ | y |   |
| Hypothetical protein^ | Haptophytes                          | Unknown | 167533720 | ~ |   |   |
| Hypothetical protein^ | Pelagophytes                         | Unknown | 167535836 | ~ |   |   |
| Hypothetical protein^ | Haptophytes                          | Unknown | 167516378 | ~ | y | + |
| Hypothetical protein^ | Chlorarachniophytes                  | Unknown | 167515756 | ~ | y | + |
| Hypothetical protein^ | Diatoms                              | Unknown | 167516746 | ~ | y |   |
| Hypothetical protein^ | Green algae                          | Unknown | 167519867 | ~ | y | + |
| Hypothetical protein^ | Haptophytes                          | Unknown | 167521071 | ~ |   | + |
| Hypothetical protein^ | Haptophytes/Green algae              | Unknown | 167521419 | ~ |   |   |
| Hypothetical protein  | Haptophytes/Green algae              | Unknown | 167519164 |   |   |   |
| Hypothetical protein^ | Haptophytes                          | Unknown | 167521523 | ~ |   | + |
| Hypothetical protein^ | Chlorarachniophytes                  | Unknown | 167523014 |   |   |   |
| Hypothetical protein^ | Diatoms/Green algae                  | Unknown | 167524172 | ~ | y |   |
| Hypothetical protein^ | Alveolates                           | Unknown | 167517835 |   |   |   |
| Hypothetical protein^ | Algae                                | Unknown | 167534417 | ~ |   |   |
| Hypothetical protein^ | Algae                                | Unknown | 167535049 |   |   |   |
| Hypothetical protein  | Algae                                | Unknown | 167537418 |   |   |   |
| Hypothetical protein^ | Haptophytes/Diatoms                  | Unknown | 167538161 | ~ |   | + |
| Hypothetical protein^ | Diatoms                              | Unknown | 167518856 | ~ |   | + |
| Hypothetical protein  | Diatoms                              | Unknown | 167518035 | ~ |   | + |
| Hypothetical protein^ | Haptophytes                          | Unknown | 167517175 | ~ | y | + |
| Hypothetical protein^ | Diatoms                              | Unknown | 167519649 |   |   |   |
| Hypothetical protein^ | Diatoms                              | Unknown | 167523603 | ~ |   |   |

|                       |                           |         |           |   |   |   |
|-----------------------|---------------------------|---------|-----------|---|---|---|
| Hypothetical protein^ | Algae                     | Unknown | 167524735 | ~ | y |   |
| Hypothetical protein^ | Green algae               | Unknown | 167527896 | ~ |   | + |
| Hypothetical protein^ | Algae                     | Unknown | 167519388 | ~ |   | + |
| Hypothetical protein^ | Haptophytes               | Unknown | 167519757 | ~ |   |   |
| Hypothetical protein^ | Haptophytes/Diatoms       | Unknown | 167521636 | ~ | y |   |
| Hypothetical protein^ | Green algae/Cyanobacteria | Unknown | 167522192 |   | y |   |
| Hypothetical protein^ | Green plants              | Unknown | 167522289 | ~ | y | + |
| Hypothetical protein^ | Haptophytes               | Unknown | 167525437 | ~ | y | + |
| Hypothetical protein^ | Algae                     | Unknown | 167525685 | ~ |   | + |
| Hypothetical protein  | Algae                     | Unknown | 167524144 |   |   |   |
| Hypothetical protein  | Algae                     | Unknown | 167537535 |   | y |   |
| Hypothetical protein  | Haptophytes               | Unknown | 167515570 | ~ | y |   |
| Hypothetical protein  | Algae                     | Unknown | 167524298 | ~ |   | + |
| Hypothetical protein  | Algae                     | Unknown | 167534947 | ~ | y | + |
| Hypothetical protein  | Haptophytes               | Unknown | 167533523 |   | y | + |
| Hypothetical protein  | Haptophytes               | Unknown | 167515422 | ~ | y | + |
| Hypothetical protein  | Euglenoids                | Unknown | 167523859 | ~ | y | + |
| Hypothetical protein  | Algae                     | Unknown | 167516636 | ~ | y |   |
| Hypothetical protein  | Algae                     | Unknown | 167521998 | ~ |   |   |
| Hypothetical protein  | Algae                     | Unknown | 167537777 | ~ |   | + |
| Hypothetical protein  | Algae                     | Unknown | 167522848 | ~ | y | + |
| Hypothetical protein  | Red algae                 | Unknown | 167516356 | ~ |   | + |
| Hypothetical protein  | Green algae               | Unknown | 167534491 | ~ | y | + |
| Hypothetical protein  | Green plants              | Unknown | 167537477 | ~ |   | + |
| Hypothetical protein  | Algae                     | Unknown | 167537588 | ~ |   |   |
| Hypothetical protein  | Chromists                 | Unknown | 167538097 | ~ |   |   |
| Hypothetical protein  | Diatoms                   | Unknown | 167516062 | ~ |   | + |
| Hypothetical protein  | Algae                     | Unknown | 167519256 | ~ |   | + |
| Hypothetical protein  | Dinoflagellates           | Unknown | 167519849 | ~ | y |   |
| Hypothetical protein  | Green algae               | Unknown | 167525567 | ~ | y |   |
| Hypothetical protein  | Haptophytes               | Unknown | 167527021 | ~ |   | + |
| Hypothetical protein  | Algae                     | Unknown | 167534047 | ~ | y | + |
| Hypothetical protein  | Haptophytes               | Unknown | 167536775 | ~ | y | + |
| Hypothetical protein  | Haptophytes               | Unknown | 167520576 | ~ |   |   |
| Hypothetical protein  | Algae                     | Unknown | 167522591 | ~ | y |   |
| Hypothetical protein  | Algae                     | Unknown | 167533453 | ~ |   | + |
| Hypothetical protein  | Chromists                 | Unknown | 167534124 | ~ | y |   |
| Hypothetical protein  | Cryptophytes              | Unknown | 167538169 | ~ |   | + |
| Hypothetical protein  | Green algae               | Unknown | 167515382 | ~ |   | + |
| Hypothetical protein  | Green algae               | Unknown | 167538595 | ~ |   | + |
| Hypothetical protein  | Chromists                 | Unknown | 167526275 | ~ |   | + |
| Hypothetical protein^ | Chromists                 | Unknown | 167538724 | ~ | y | + |
| Hypothetical protein  | Chlorarachniophytes       | Unknown | 167534439 | ~ |   | + |
| Hypothetical protein  | Chromists                 | Unknown | 167535947 | ~ |   | + |
| Hypothetical protein  | Chromalveolates           | Unknown | 167523044 | ~ |   | + |
| Hypothetical protein  | Algae                     | Unknown | 167516234 | ~ | y |   |
| Hypothetical protein  | Algae                     | Unknown | 167522493 | ~ | y |   |
| Hypothetical protein  | Haptophytes               | Unknown | 167515494 |   | y |   |
| Hypothetical protein  | Chromists                 | Unknown | 167524032 | ~ |   | + |
| Hypothetical protein  | Algae                     | Unknown | 167516576 | ~ | y | + |
| Hypothetical protein  | Chromalveolates           | Unknown | 167520320 | ~ |   |   |
| Hypothetical protein  | Algae                     | Unknown | 167533027 |   | y |   |
| Hypothetical protein  | Algae                     | Unknown | 167515760 |   | y |   |
| Hypothetical protein  | Algae                     | Unknown | 167521007 |   |   |   |
| Hypothetical protein* | Algae                     | Unknown | 167521009 |   | y |   |
| Hypothetical protein  | Algae                     | Unknown | 167521005 | ~ |   |   |
| Hypothetical protein* | Algae                     | Unknown | 167535041 | ~ |   | + |
| Hypothetical protein  | Algae                     | Unknown | 167523256 | ~ | y |   |
| Hypothetical protein  | Algae                     | Unknown | 167523038 |   |   |   |
| Hypothetical protein  | Algae                     | Unknown | 167526812 |   |   |   |
| Hypothetical protein  | Algae                     | Unknown | 167538173 | ~ | y |   |
| Hypothetical protein  | Algae                     | Unknown | 167527334 | ~ | y | + |
| Hypothetical protein  | Algae                     | Unknown | 167516376 | ~ |   | + |
| Hypothetical protein  | Algae                     | Unknown | 167516700 | ~ | y | + |
| Hypothetical protein* | Algae                     | Unknown | 167518201 | ~ | y | + |
| Hypothetical protein  | Algae                     | Unknown | 167516194 | ~ |   |   |
| Hypothetical protein  | Algae                     | Unknown | 167520782 |   |   |   |
| Hypothetical protein  | chromalveolata            | Unknown | 167519226 |   | y |   |
| Hypothetical protein  | Chromalveolata            | Unknown | 167520778 |   |   |   |
| Hypothetical protein  | Chromalveolates           | Unknown | 167536443 |   | y |   |
| Hypothetical protein  | Chromalveolates           | Unknown | 167535035 |   |   |   |
| Hypothetical protein  | Chromists                 | Unknown | 167538191 | ~ | y |   |

|                      |             |         |           |   |  |   |
|----------------------|-------------|---------|-----------|---|--|---|
| Hypothetical protein | Haptophytes | Unknown | 167518490 | ~ |  |   |
| Hypothetical protein | Haptophytes | Unknown | 167538306 | ~ |  | + |



\*\*\*\*\*

**Maximum likelihood trees for the algal and bacterial genes identified in *Monosiga* (see text and supplemental table for details).** Numbers for bootstrap support values above 70% were shown near the branches. The cycle in orange color points to the clade containing sequences of *Monosiga*, bacteria, or/and algae.

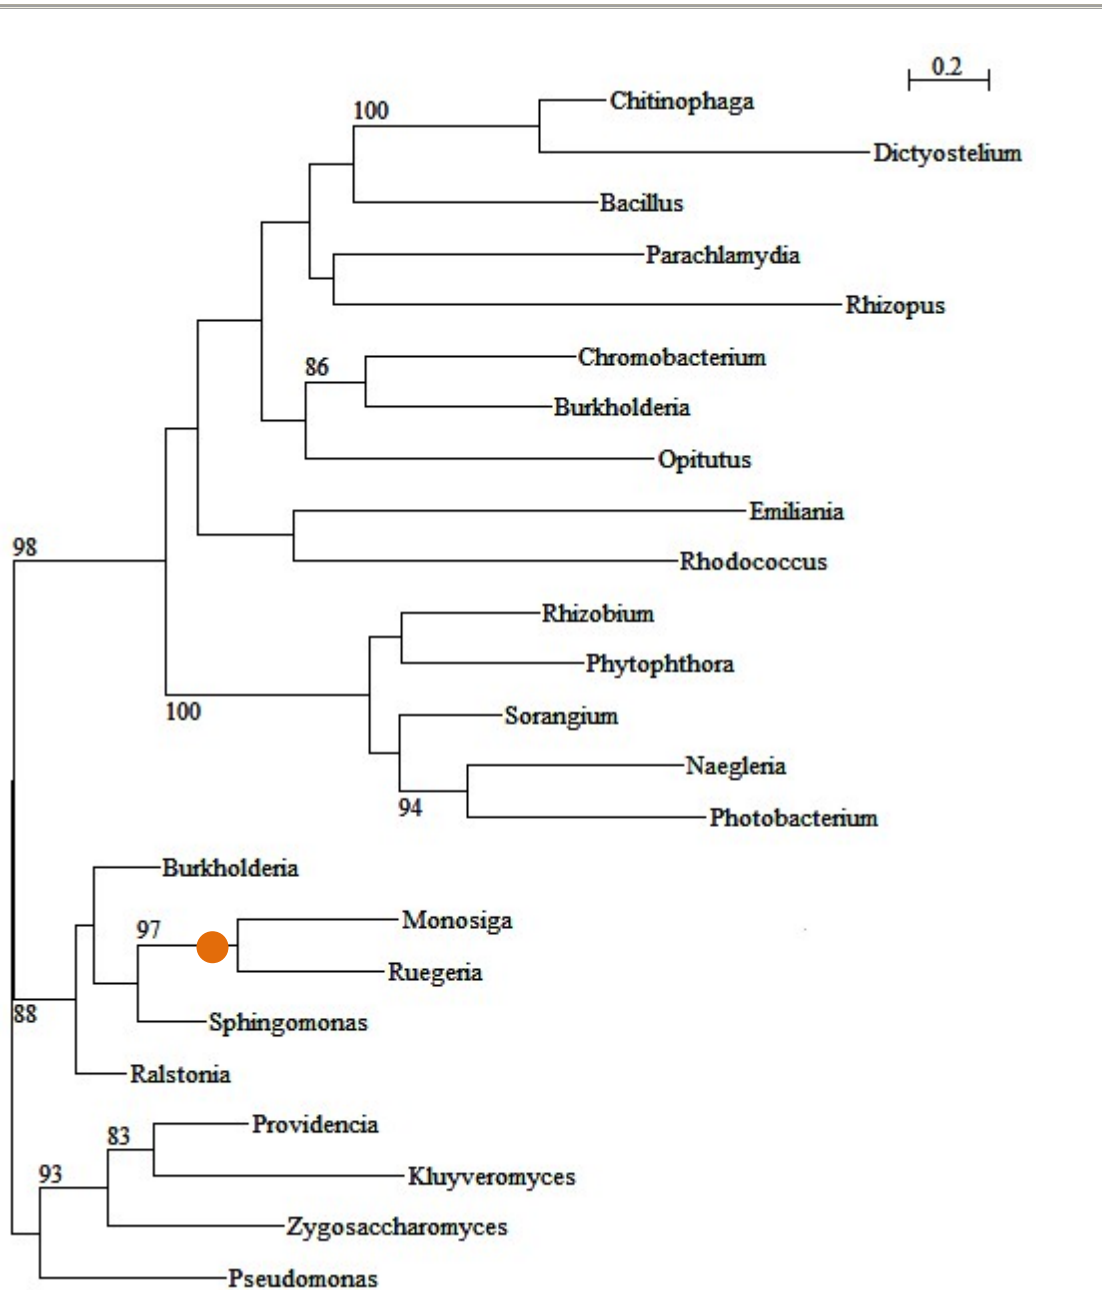

**Figure S1.** Phylogeny of 2-nitropropane dioxygenase (GI No. 167538159).

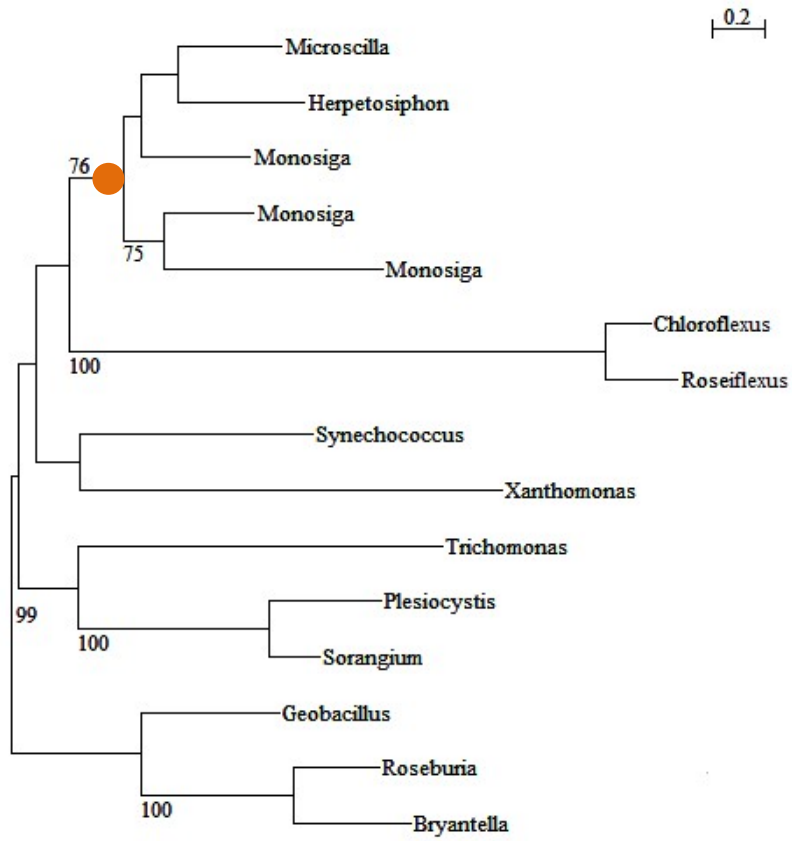

**Figure S2.** Phylogeny of SCP-like extracellular protein (Gi No. 167534469, 167524445, and 167523453). *Monosiga* only has homologs in bacteria.

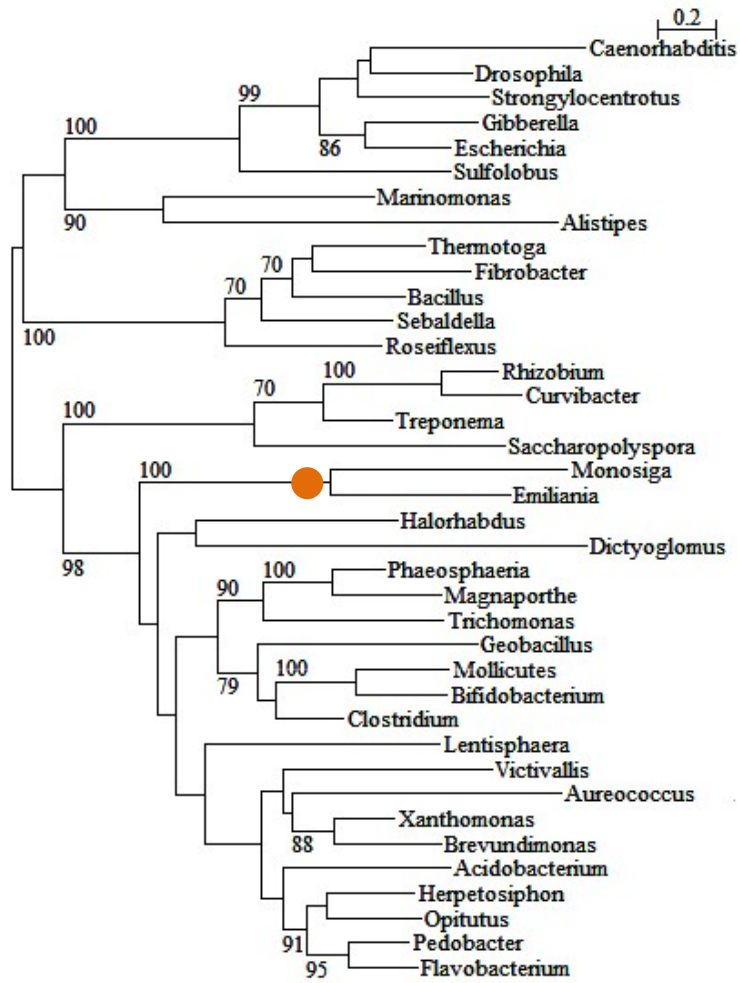

**Figure S3.** Phylogeny of beta-galactosidase (GI No. 167525643).

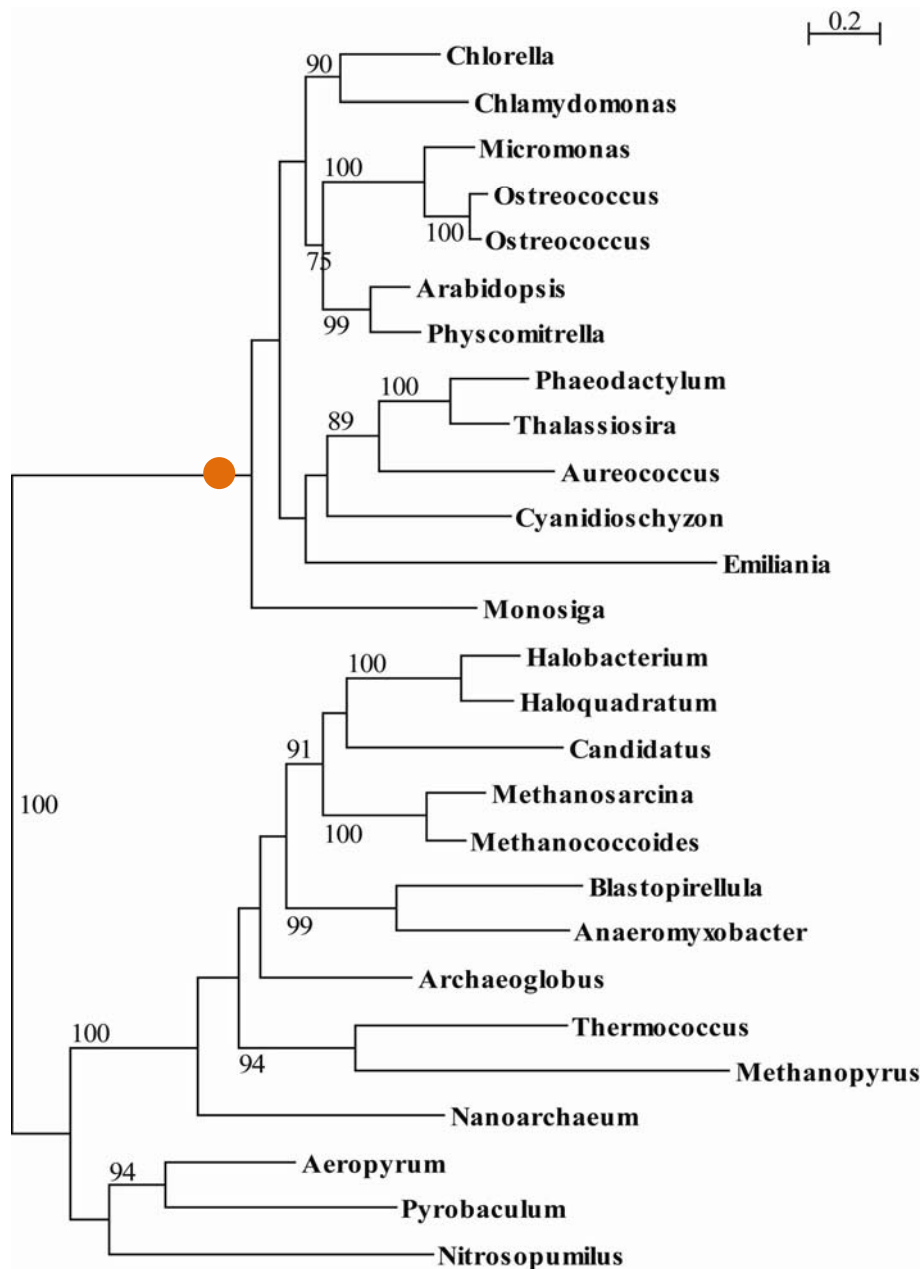

**Figure S4.** Phylogeny of DNA topoisomerase VI subunit B (GI No. 167526605).

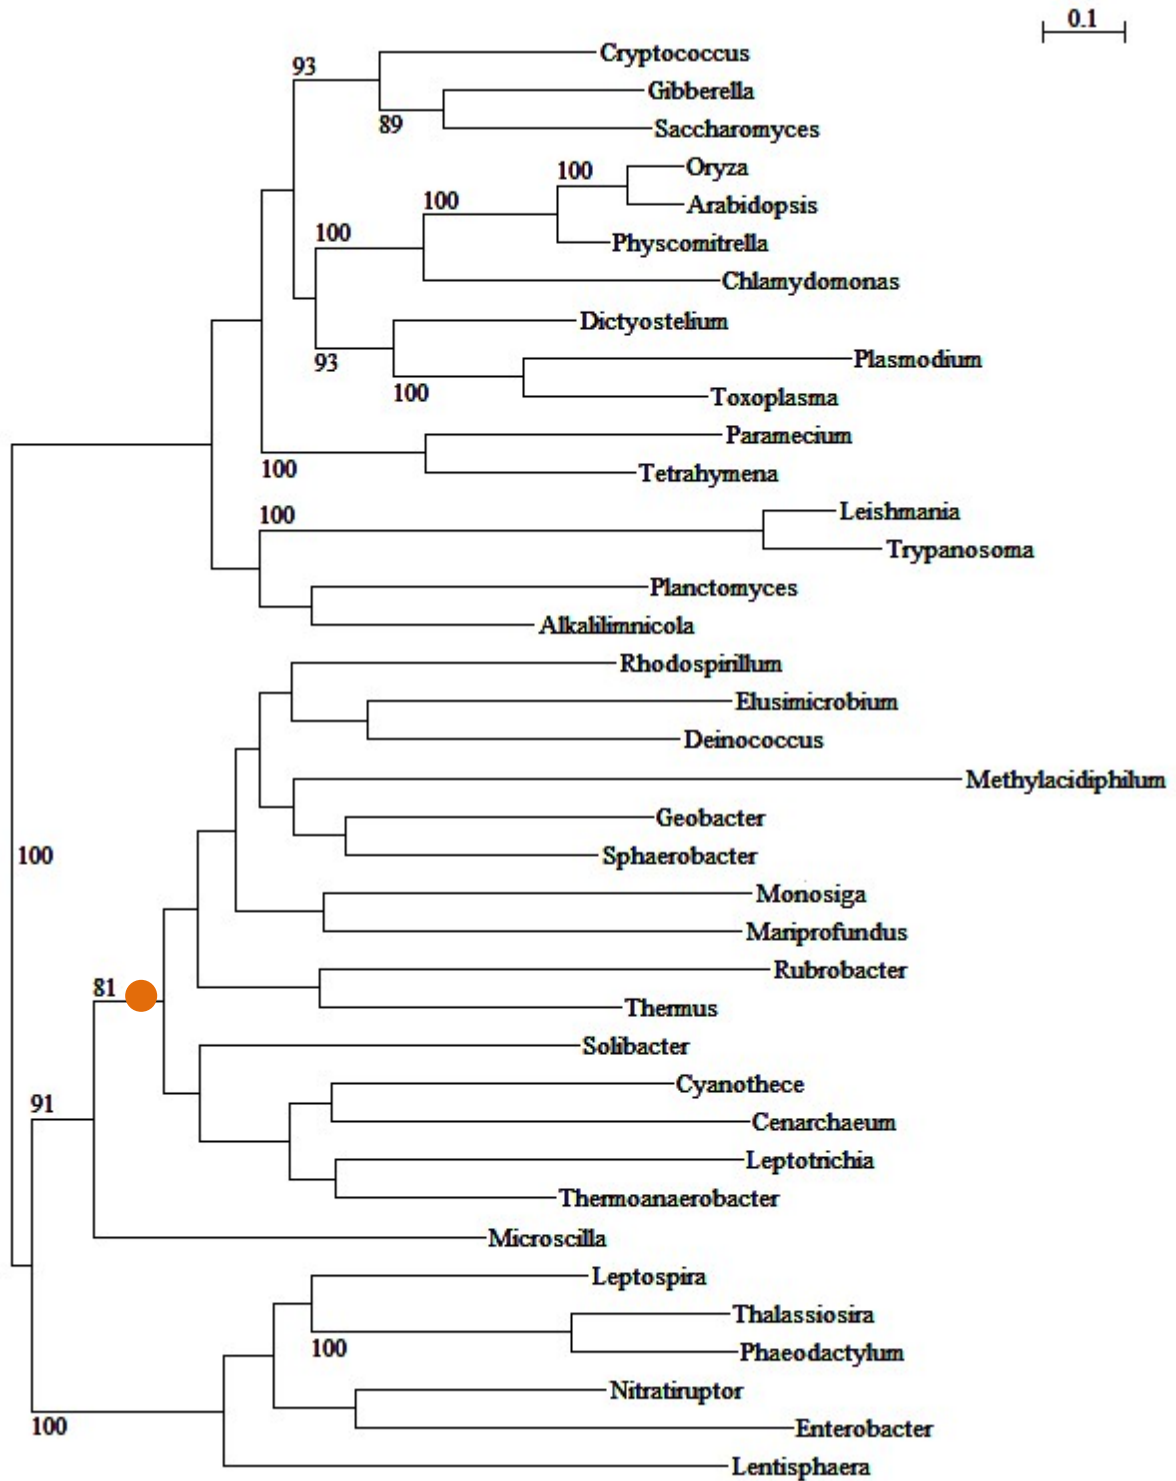

Figure S5. Phylogeny of phosphoenolpyruvate carboxykinase (GI No. 167519713).

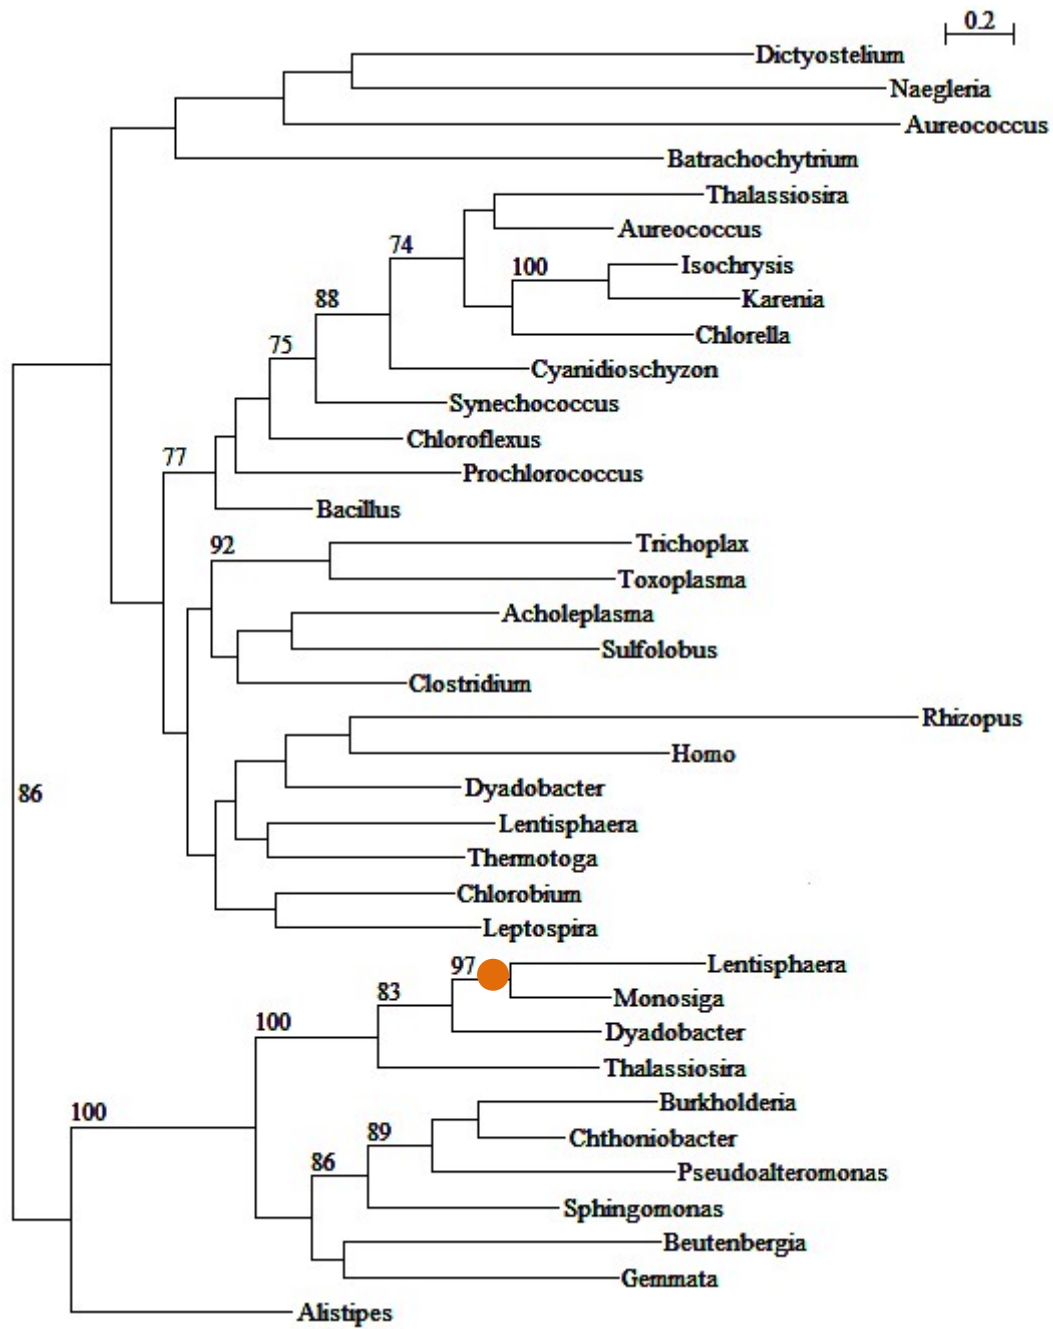

**Figure S6.** Phylogeny of short-chain dehydrogenase/reductase (GI No. 167515652).

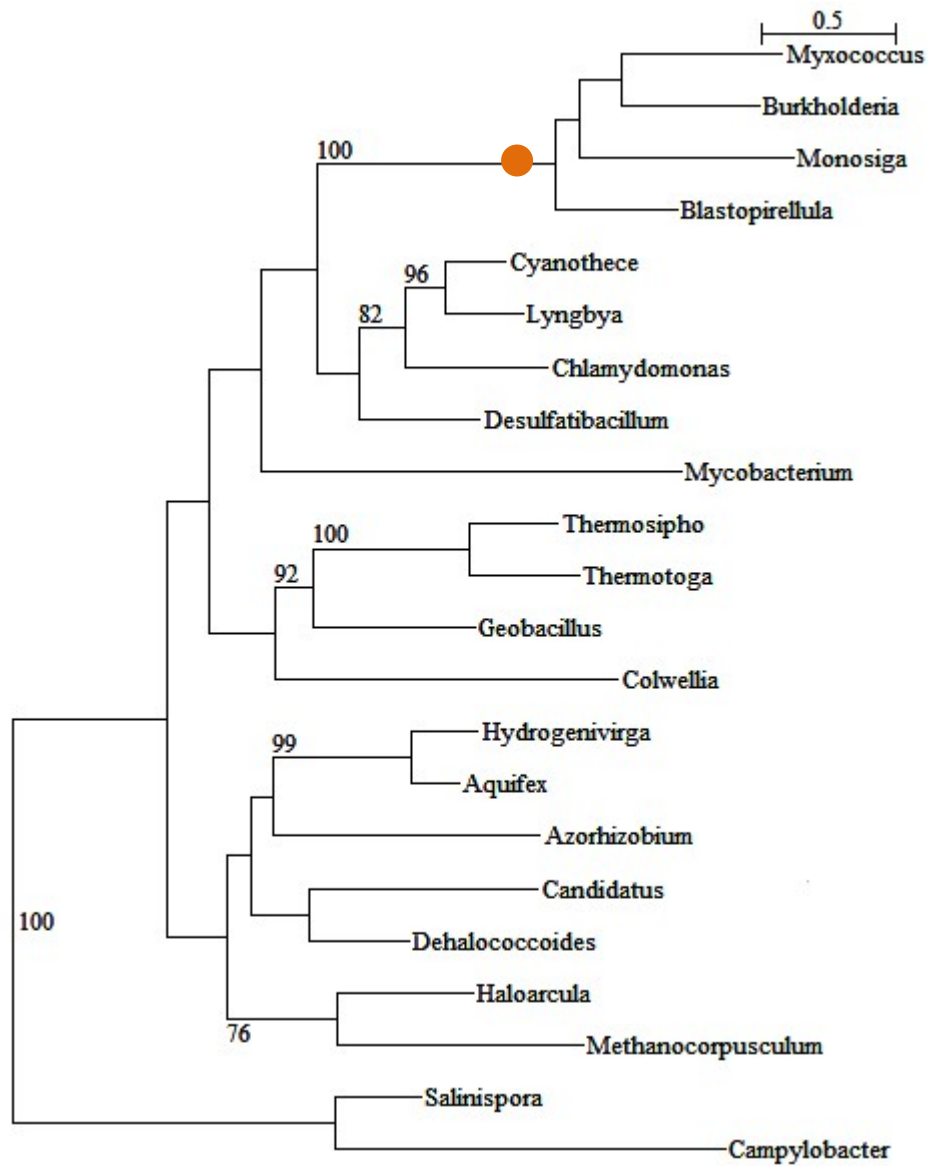

**Figure S7.** Phylogeny of one hypothetical protein (GI No. 167518772).

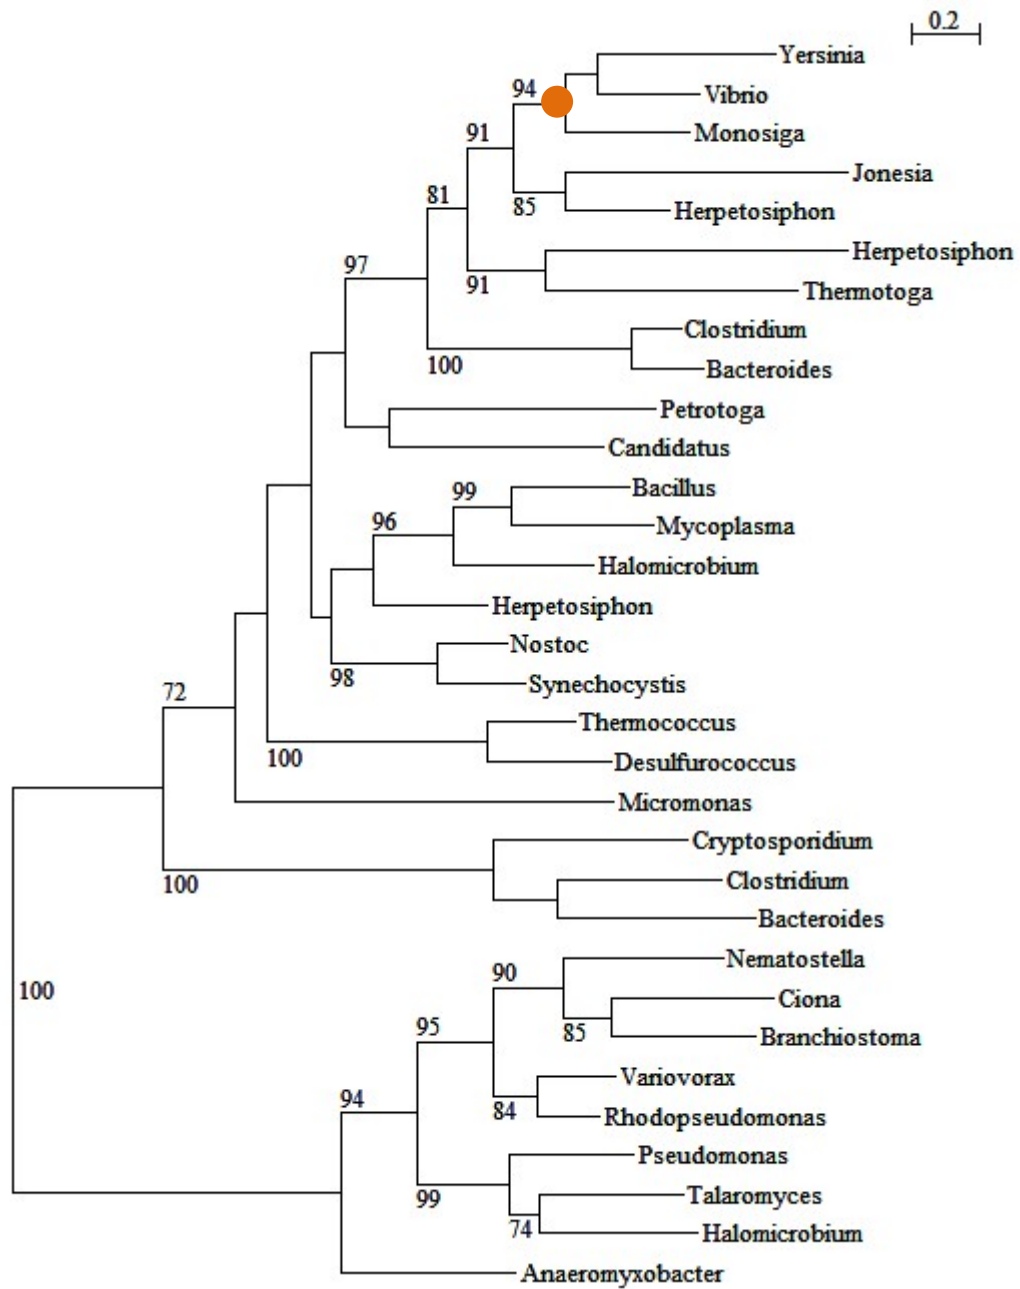

**Figure S8.** Phylogeny of maltodextrin glucosidase (GI No. 167521117).



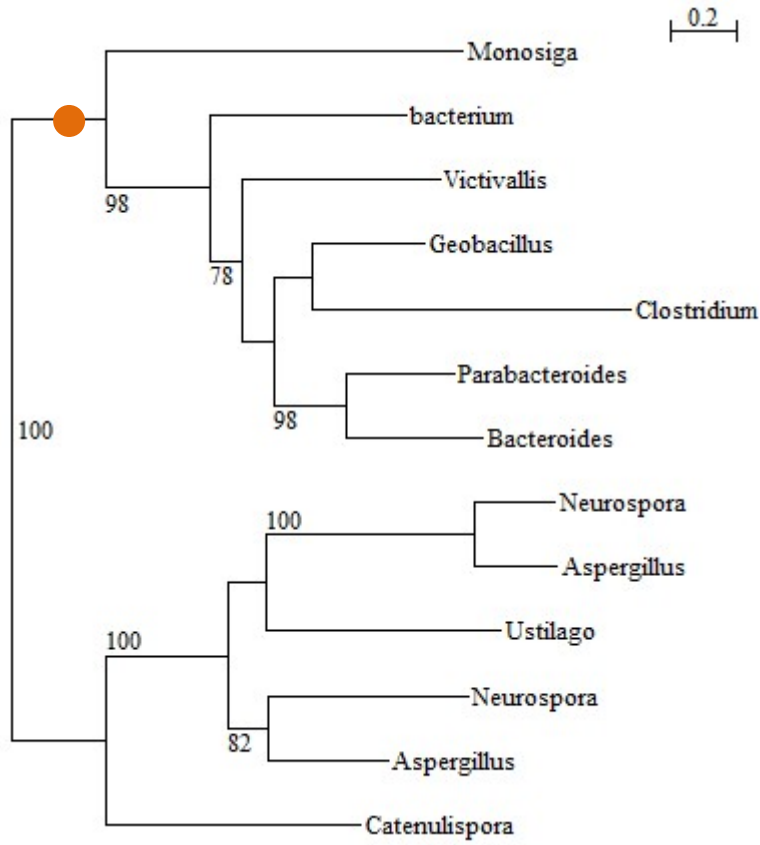

**Figure S9.** Phylogeny of glutaminase A (GI No. 167522419).

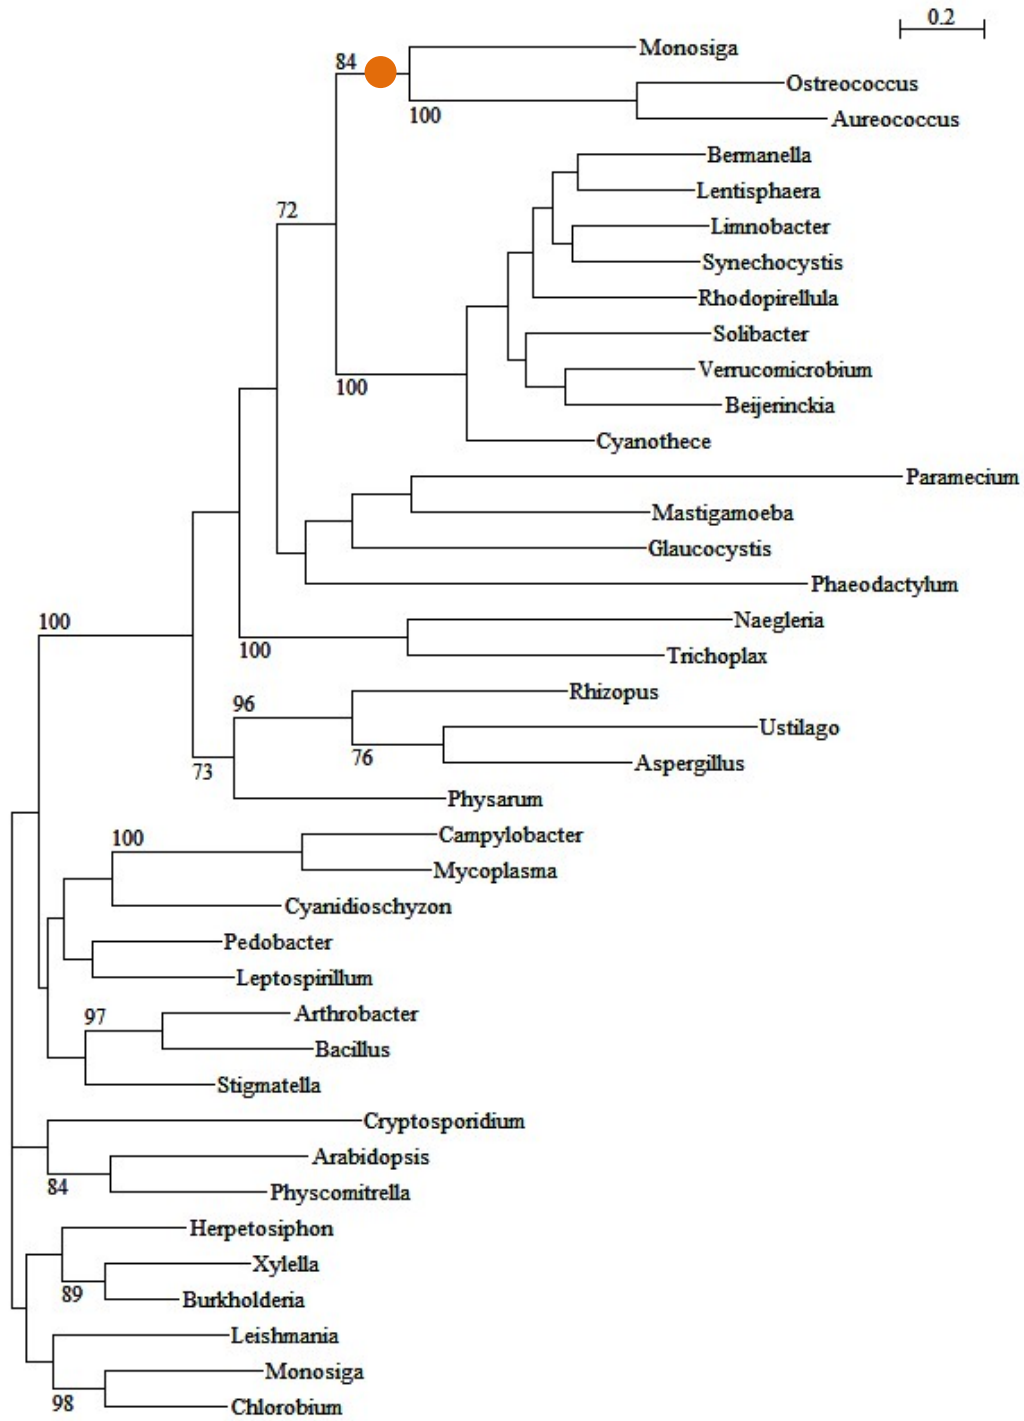

**Figure S10.** Phylogeny of alcohol dehydrogenase (GI No. 167526433).

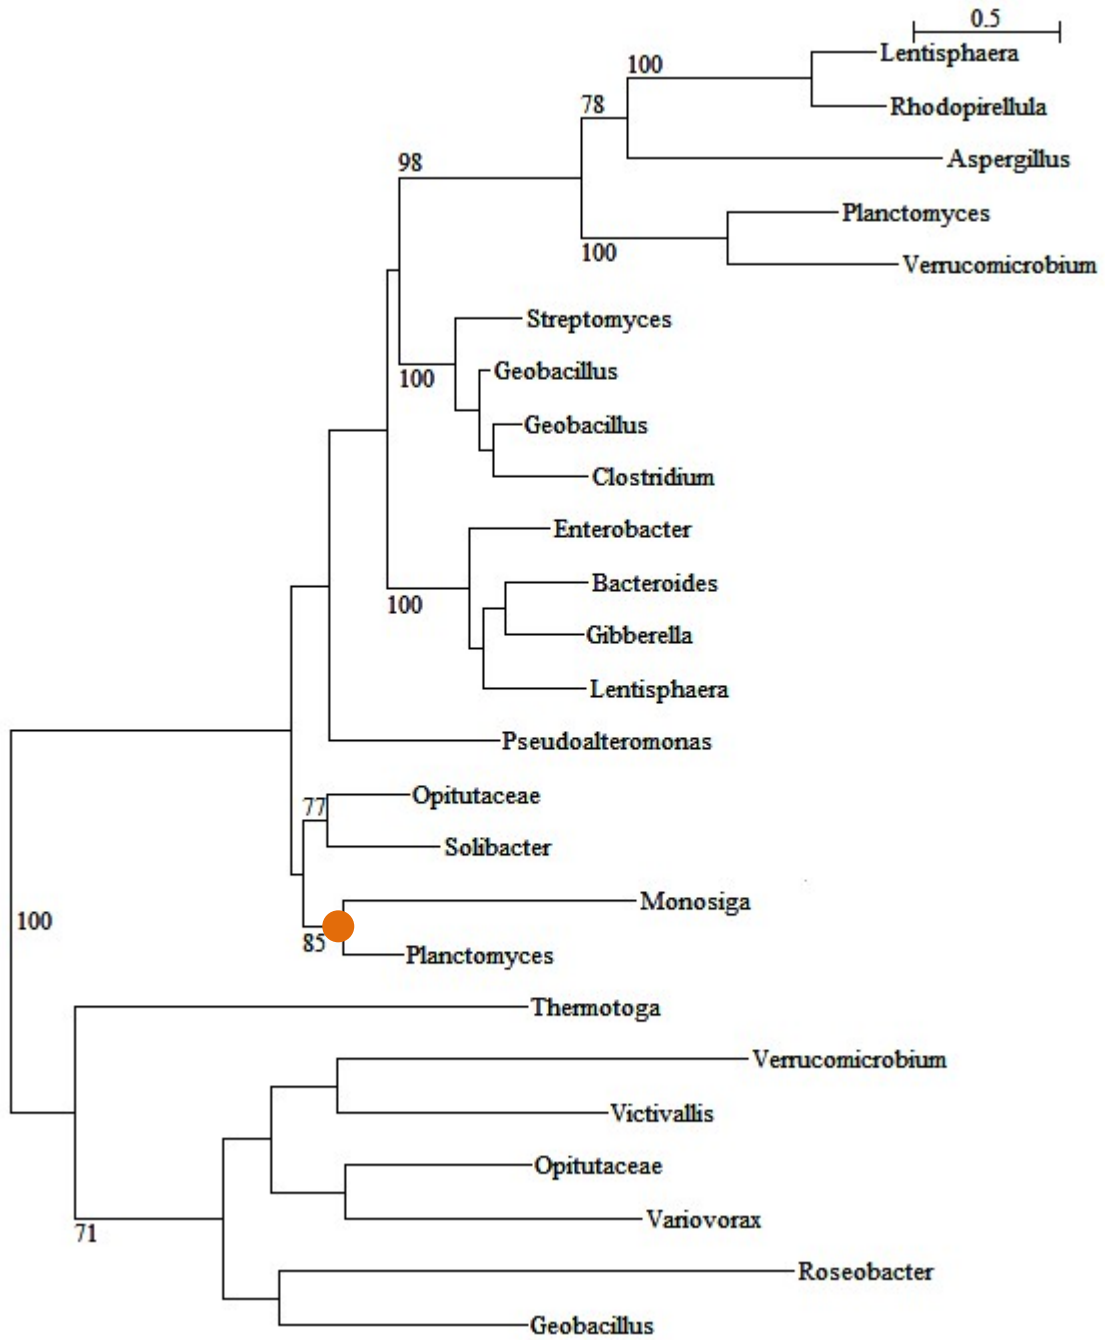

**Figure S11.** Phylogeny of fumarate reductase/succinate dehydrogenase (GI No. 167526295).

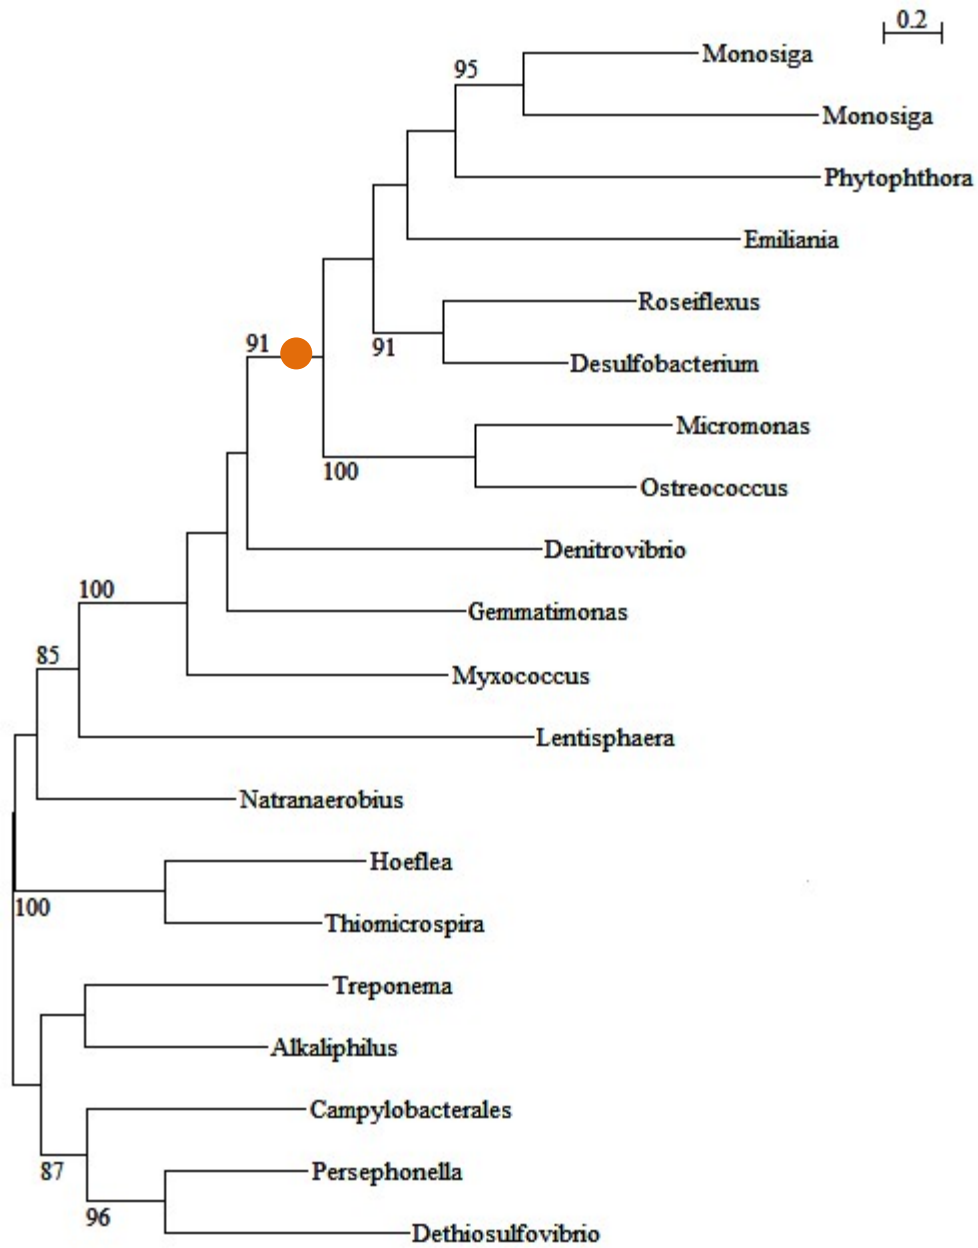

**Figure S12.** Phylogeny of TrkA (Na<sup>+</sup>/H<sup>+</sup> antiporter) (Gi No. 167526916 and 167537773).

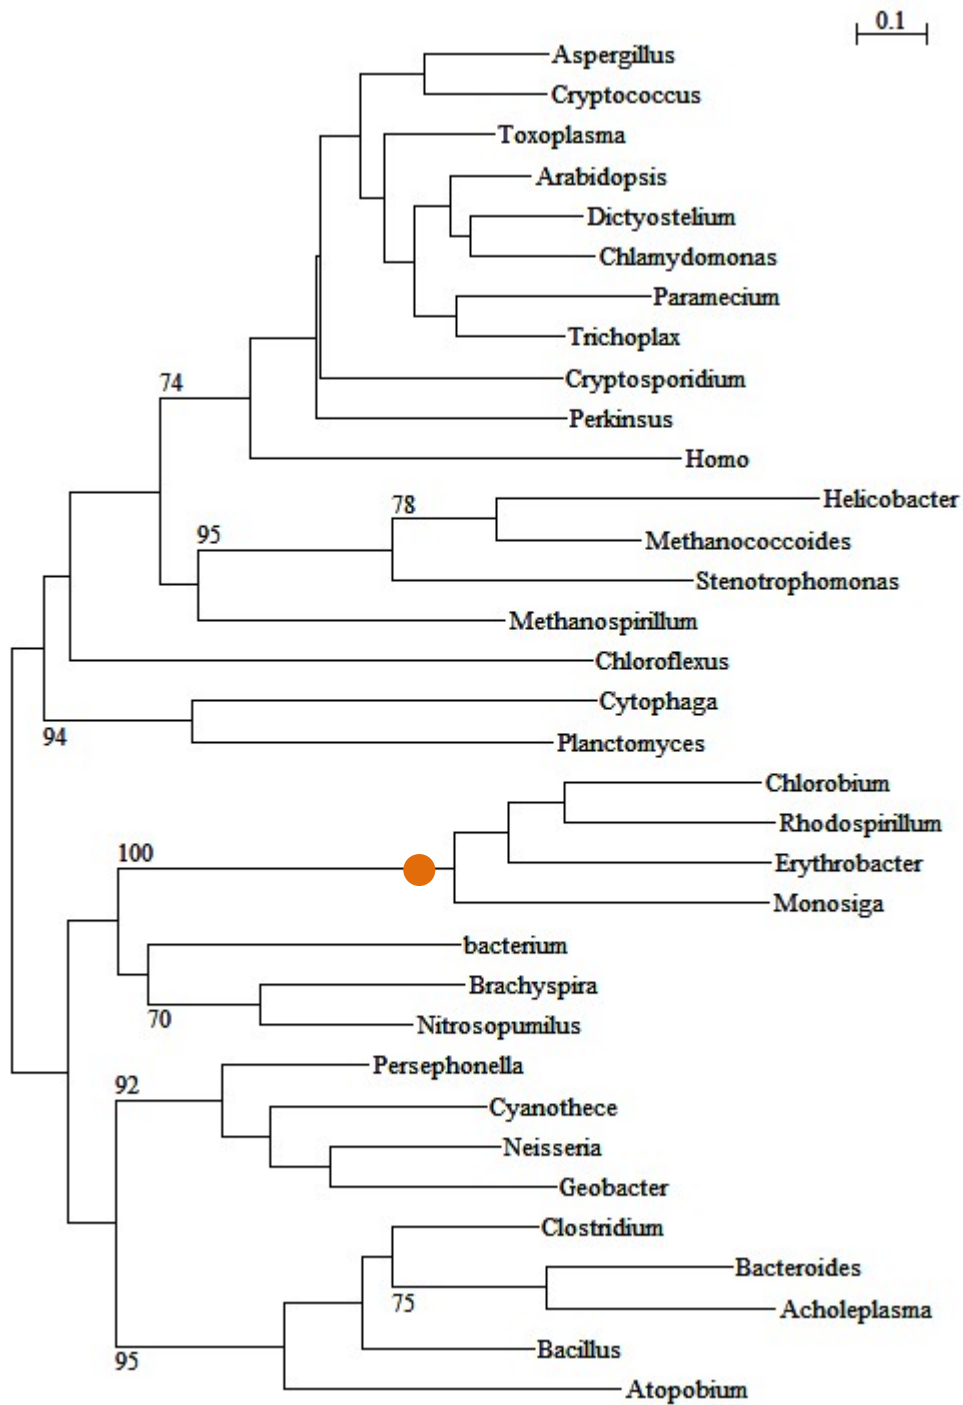

**Figure S13.** Phylogeny of peptidyl-prolyl cis-trans isomerase (GI No. 167527426).

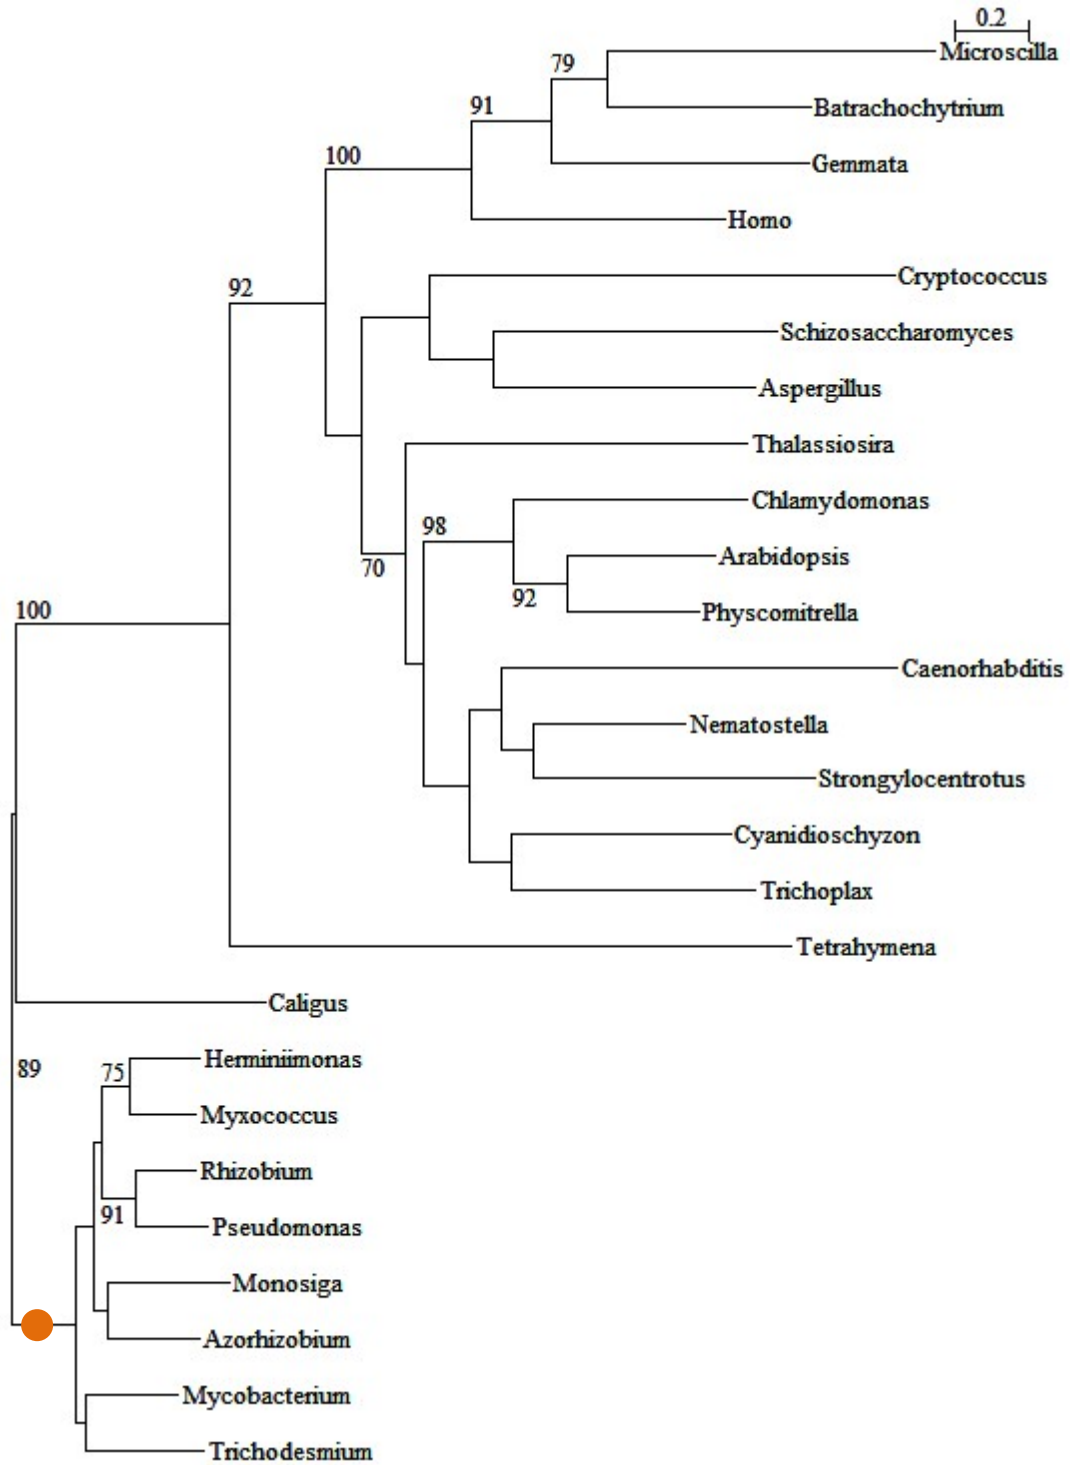

**Figure S14.** Phylogeny of flavin-containing monooxygenase (GI No. 167534098).

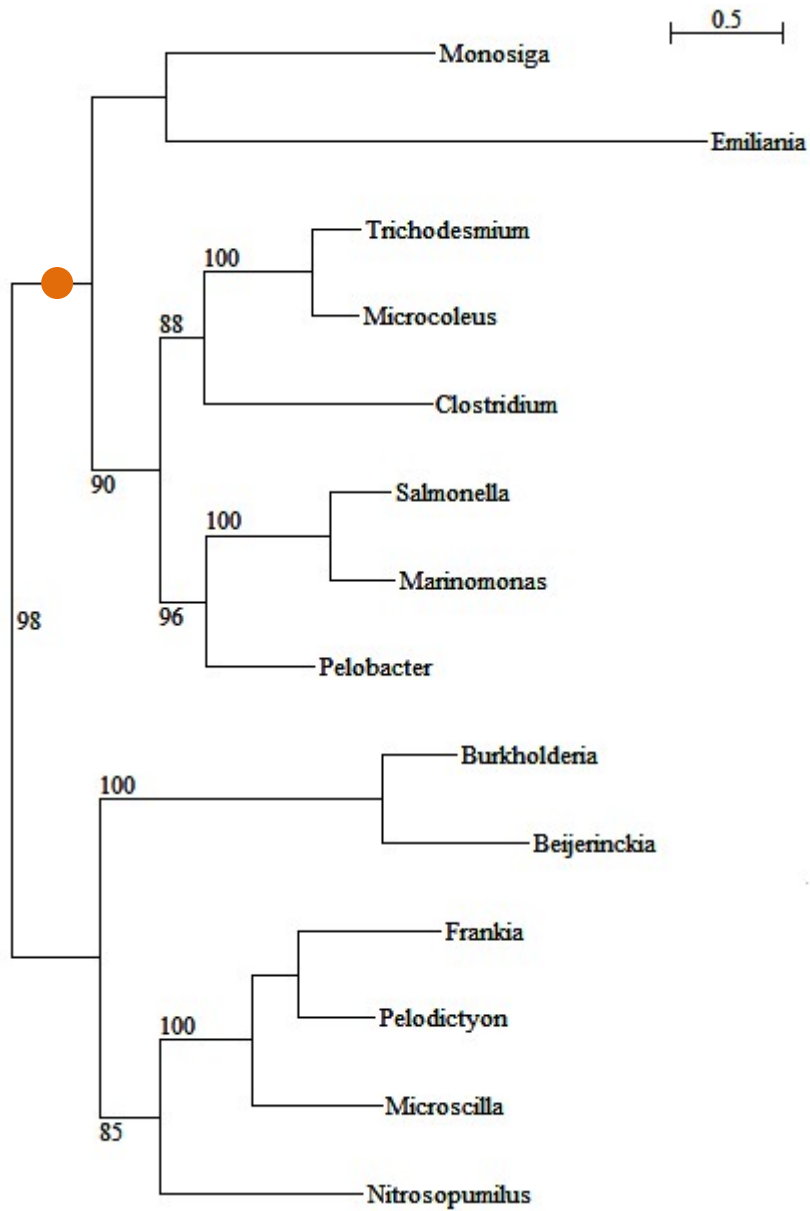

**Figure S15.** Phylogeny of regulatory protein CII (GI No. 167536551).

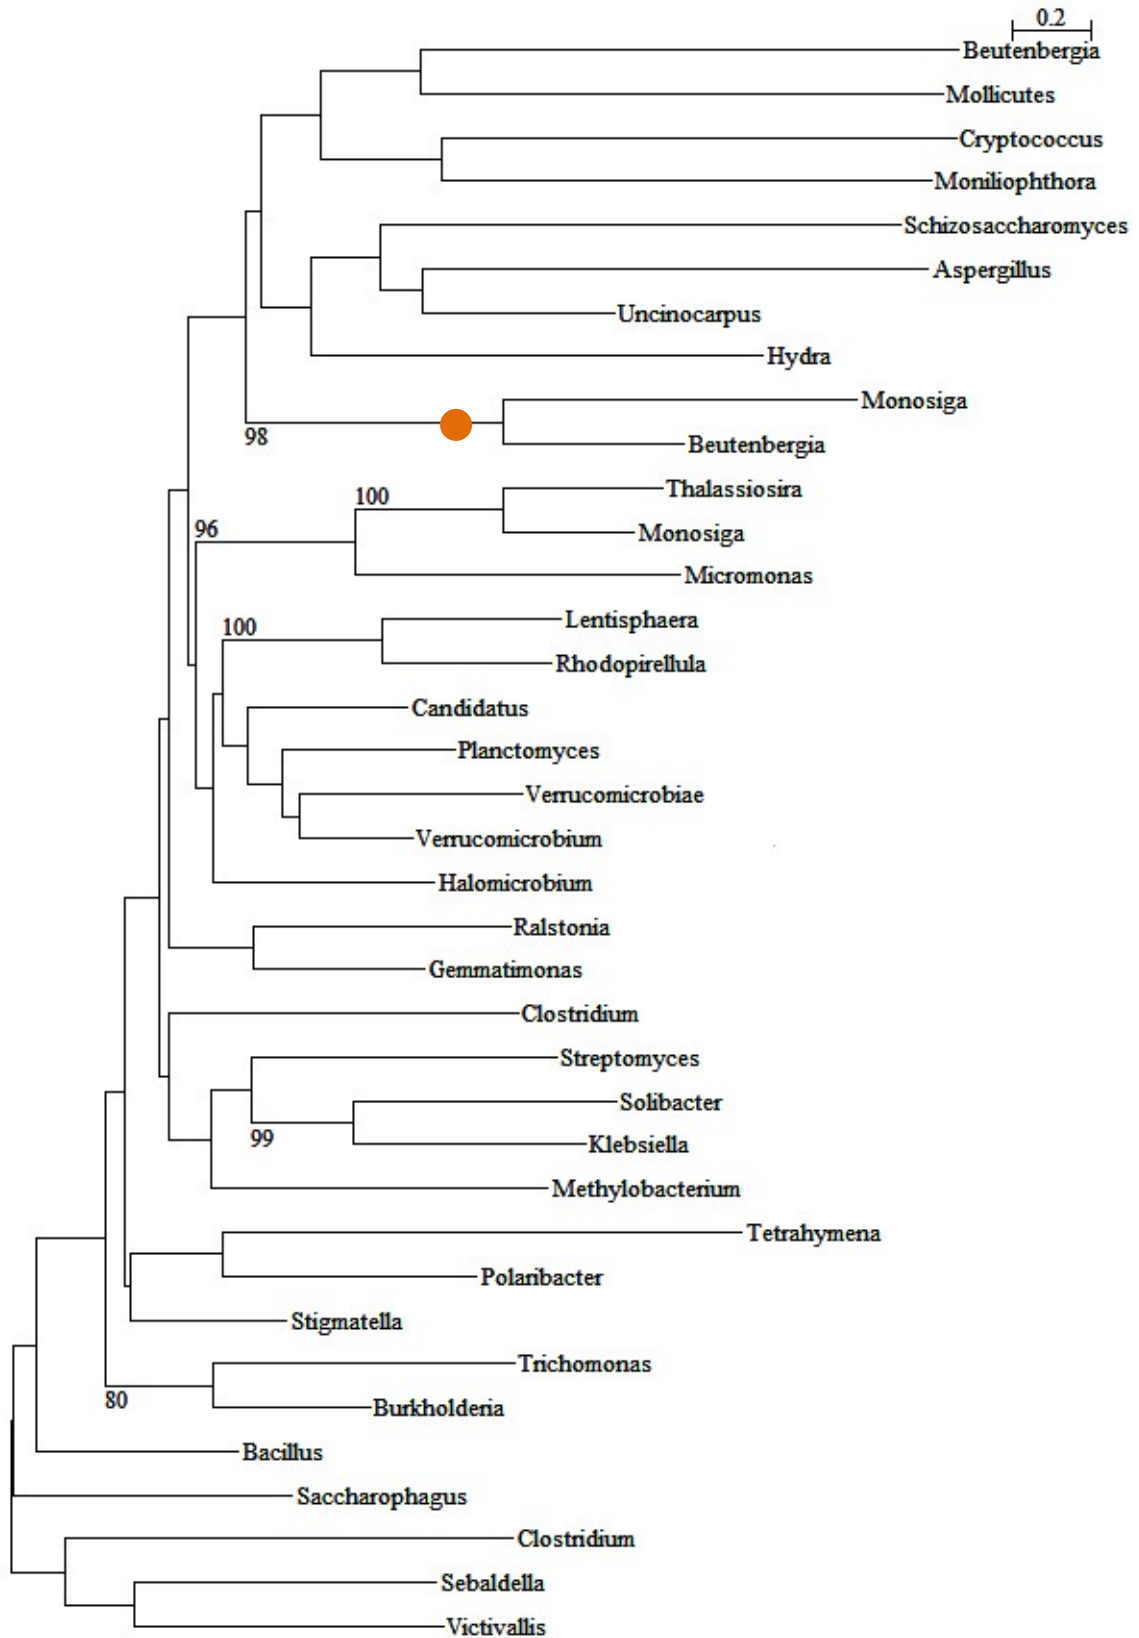

**Figure S16.** Phylogeny of one hypothetical protein (GI No. 167537457).



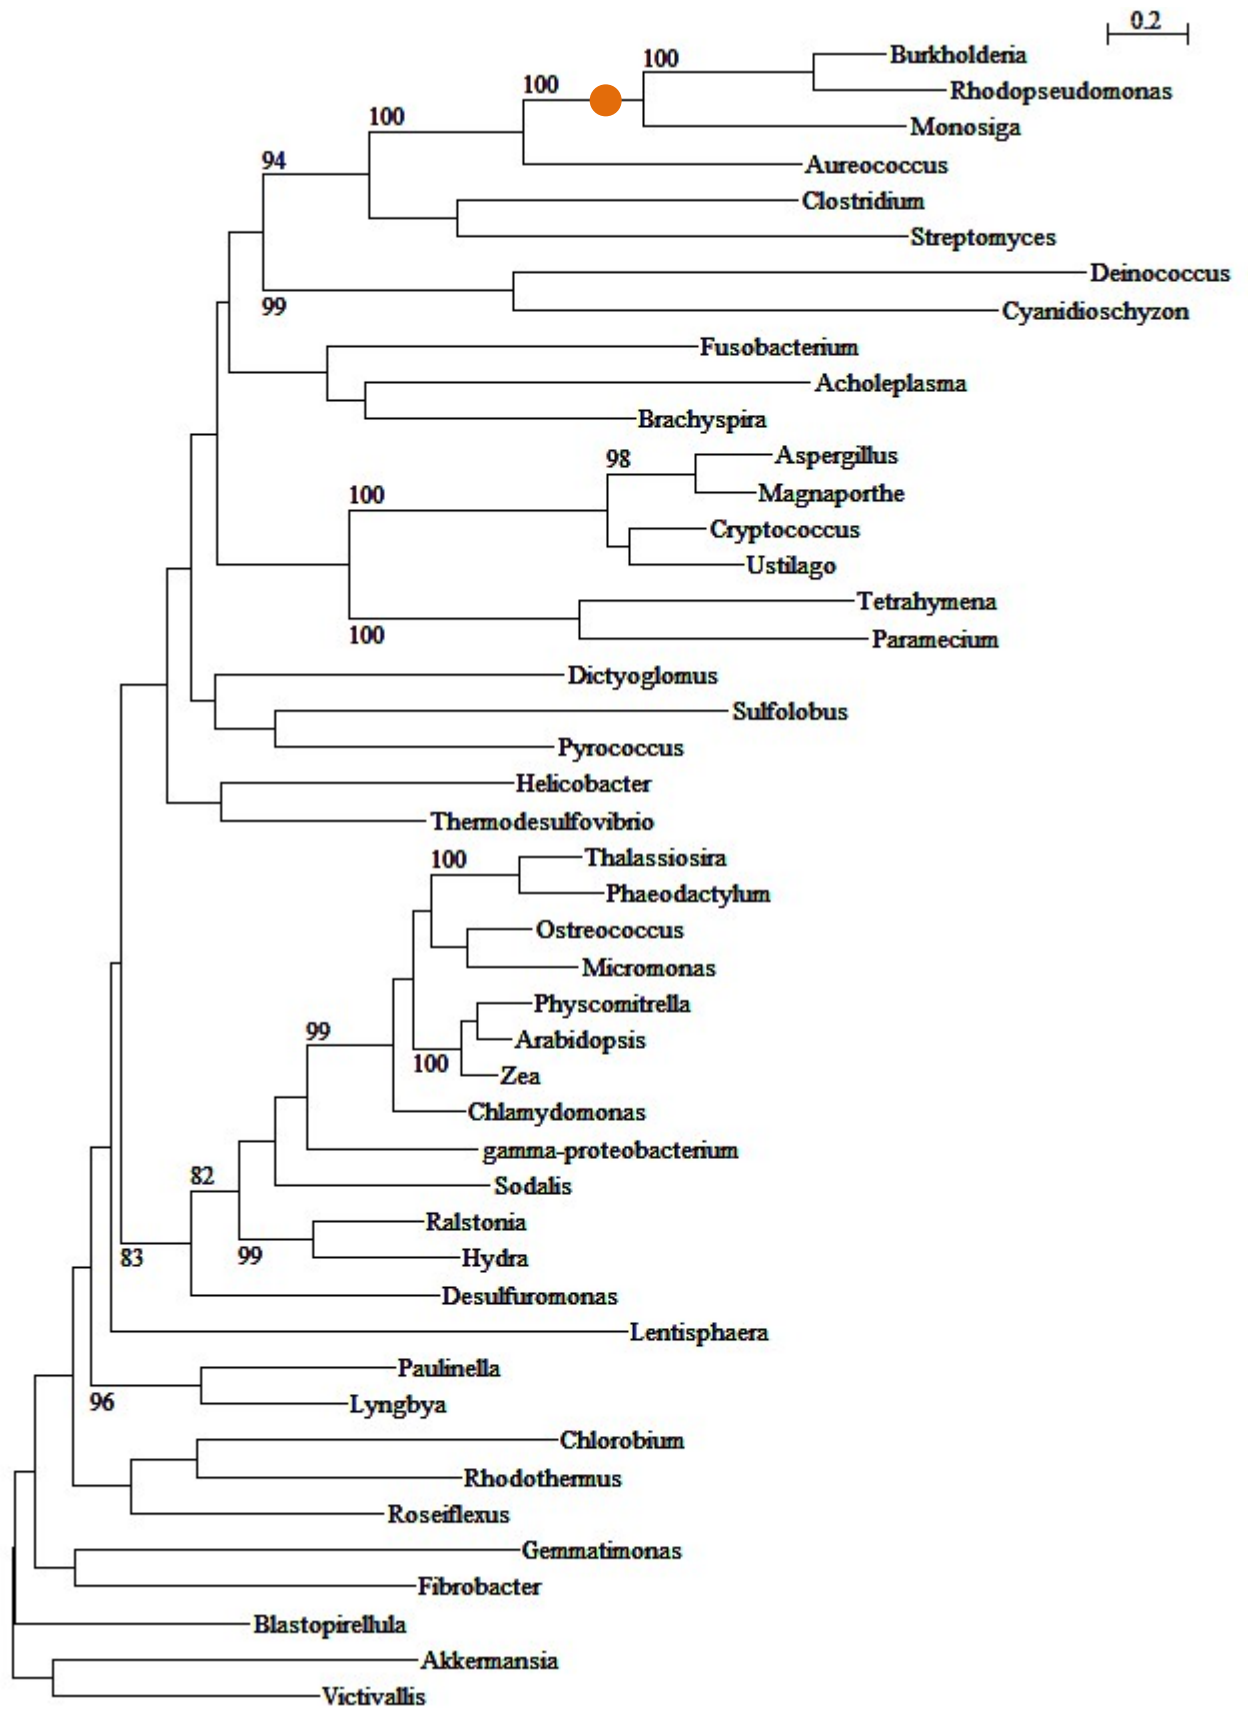

**Figure S17.** Phylogeny of 3-dehydroquinate synthase (GI No. 167537749).

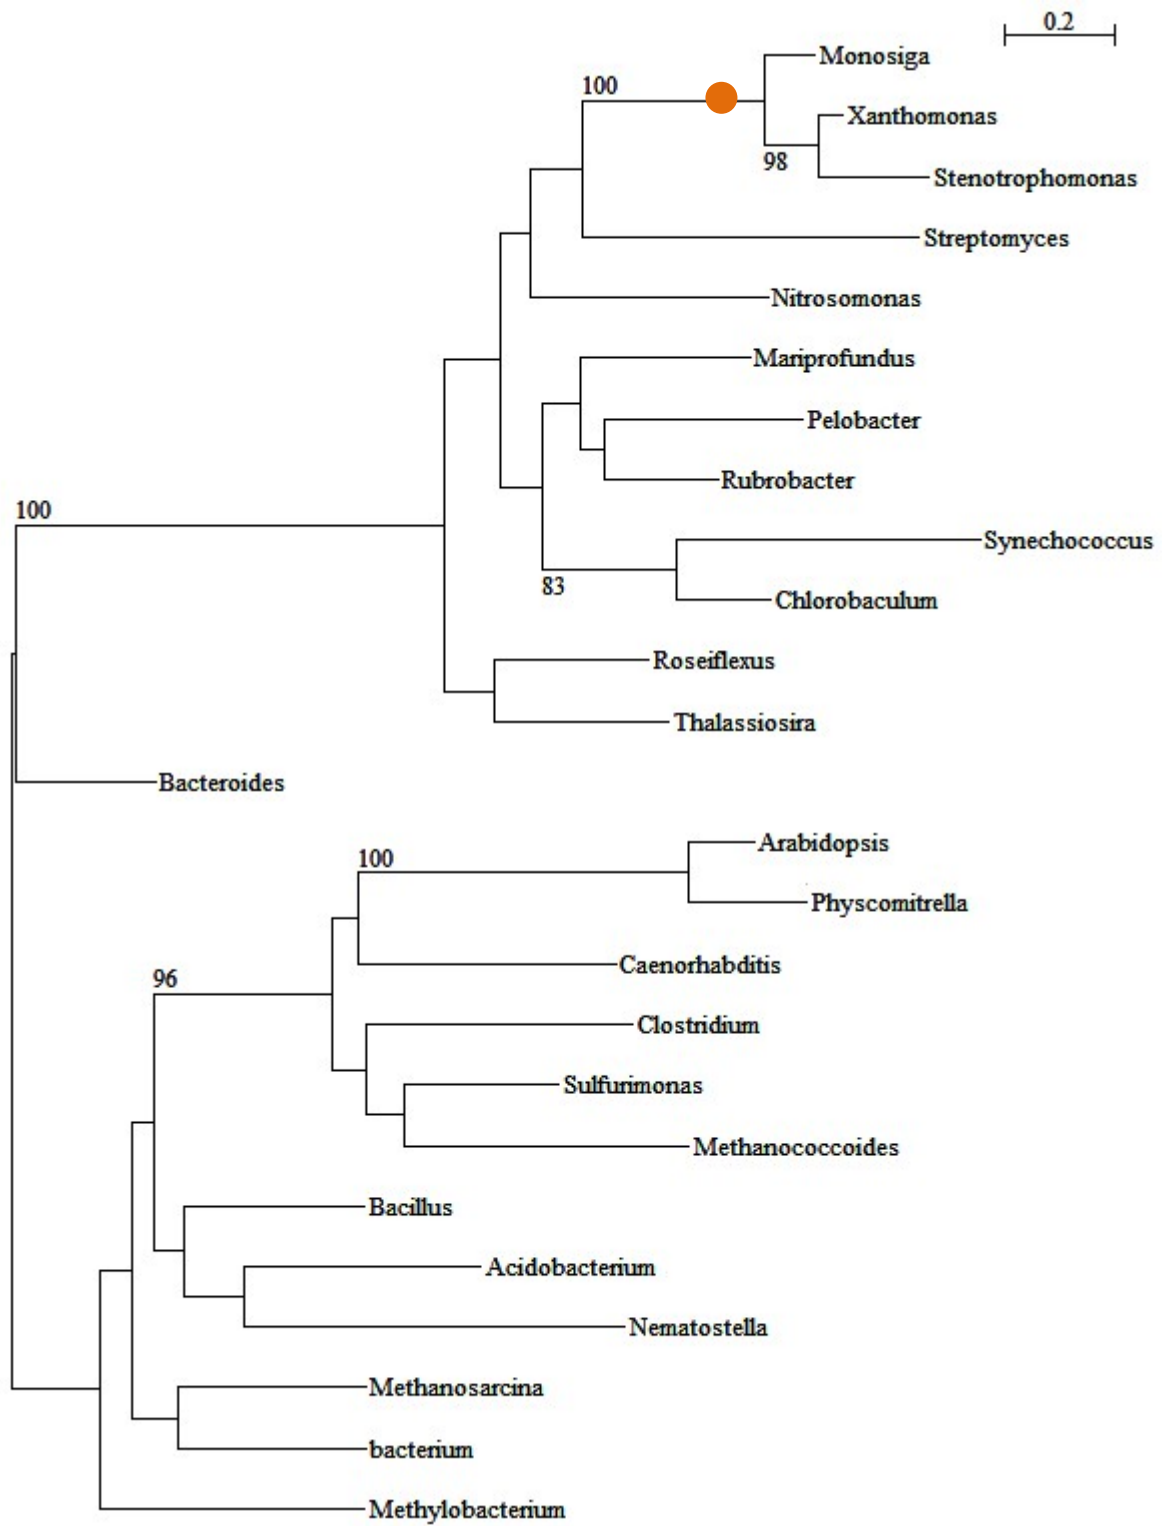

**Figure S18.** Phylogeny of CMP/dCMP deaminase (GI No. 167538365).

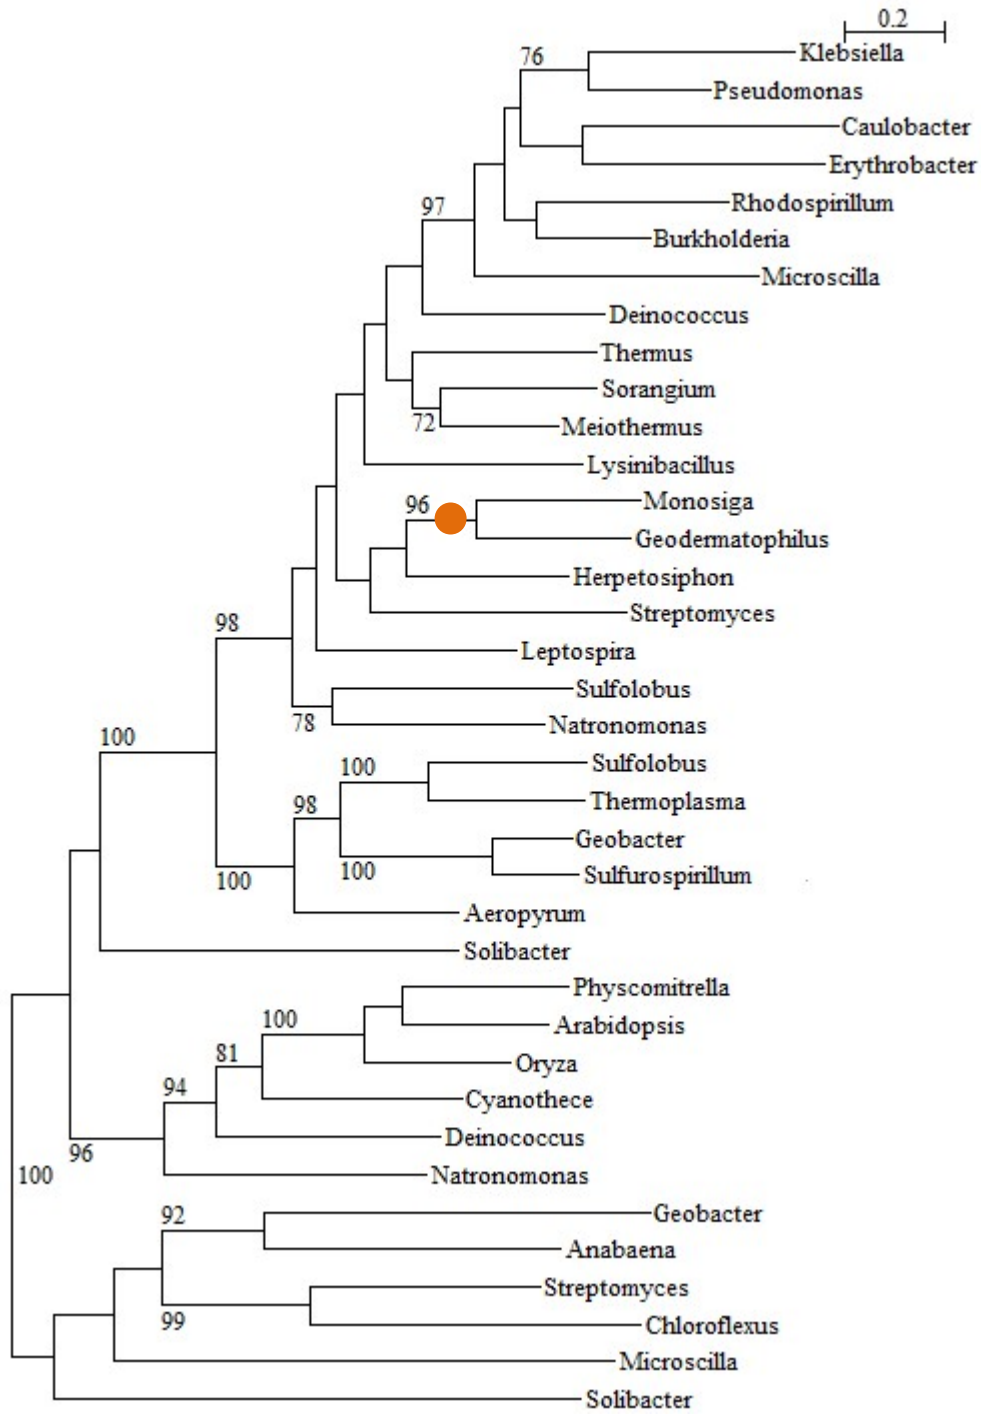

**Figure S19.** Phylogeny of fatty-acyl-CoA synthetase (GI No. 167516368).

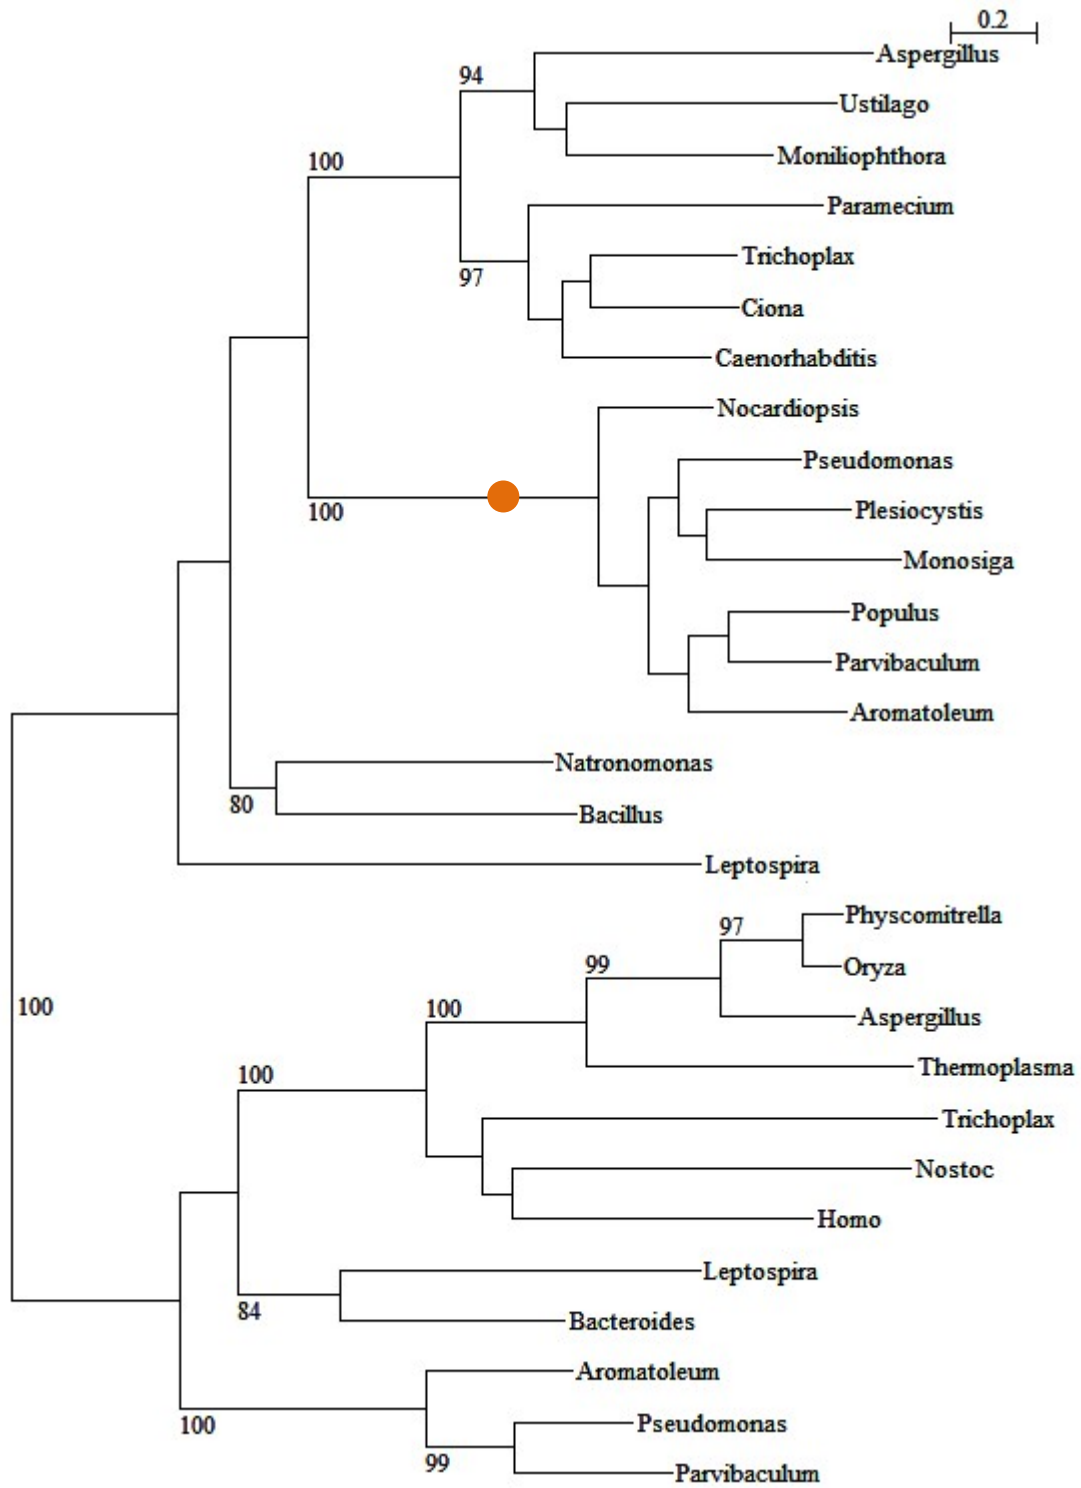

**Figure S20.** Phylogeny of acyl-CoA dehydrogenase (GI No. 167518089).

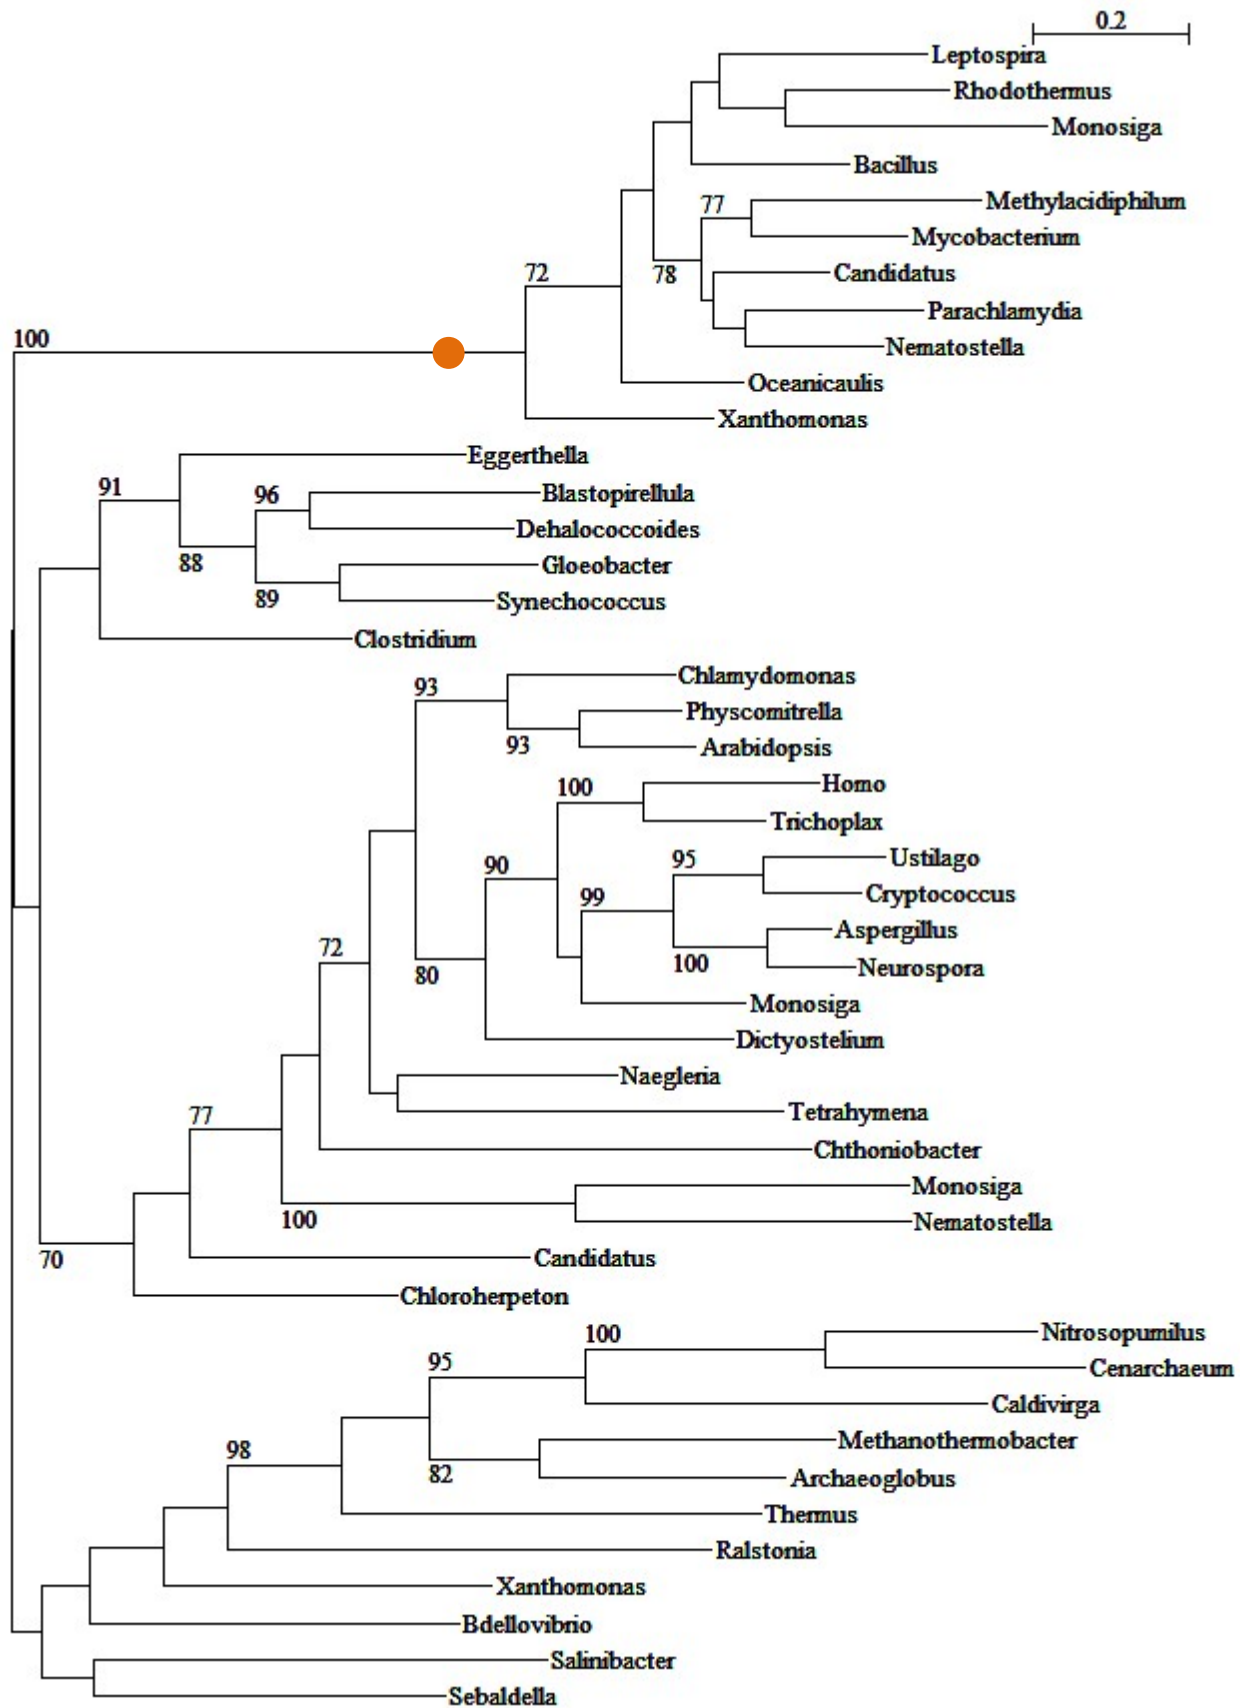

**Figure S21.** Phylogeny of isocitrate dehydrogenase (NAD<sup>+</sup>) (GI No. 167518099).

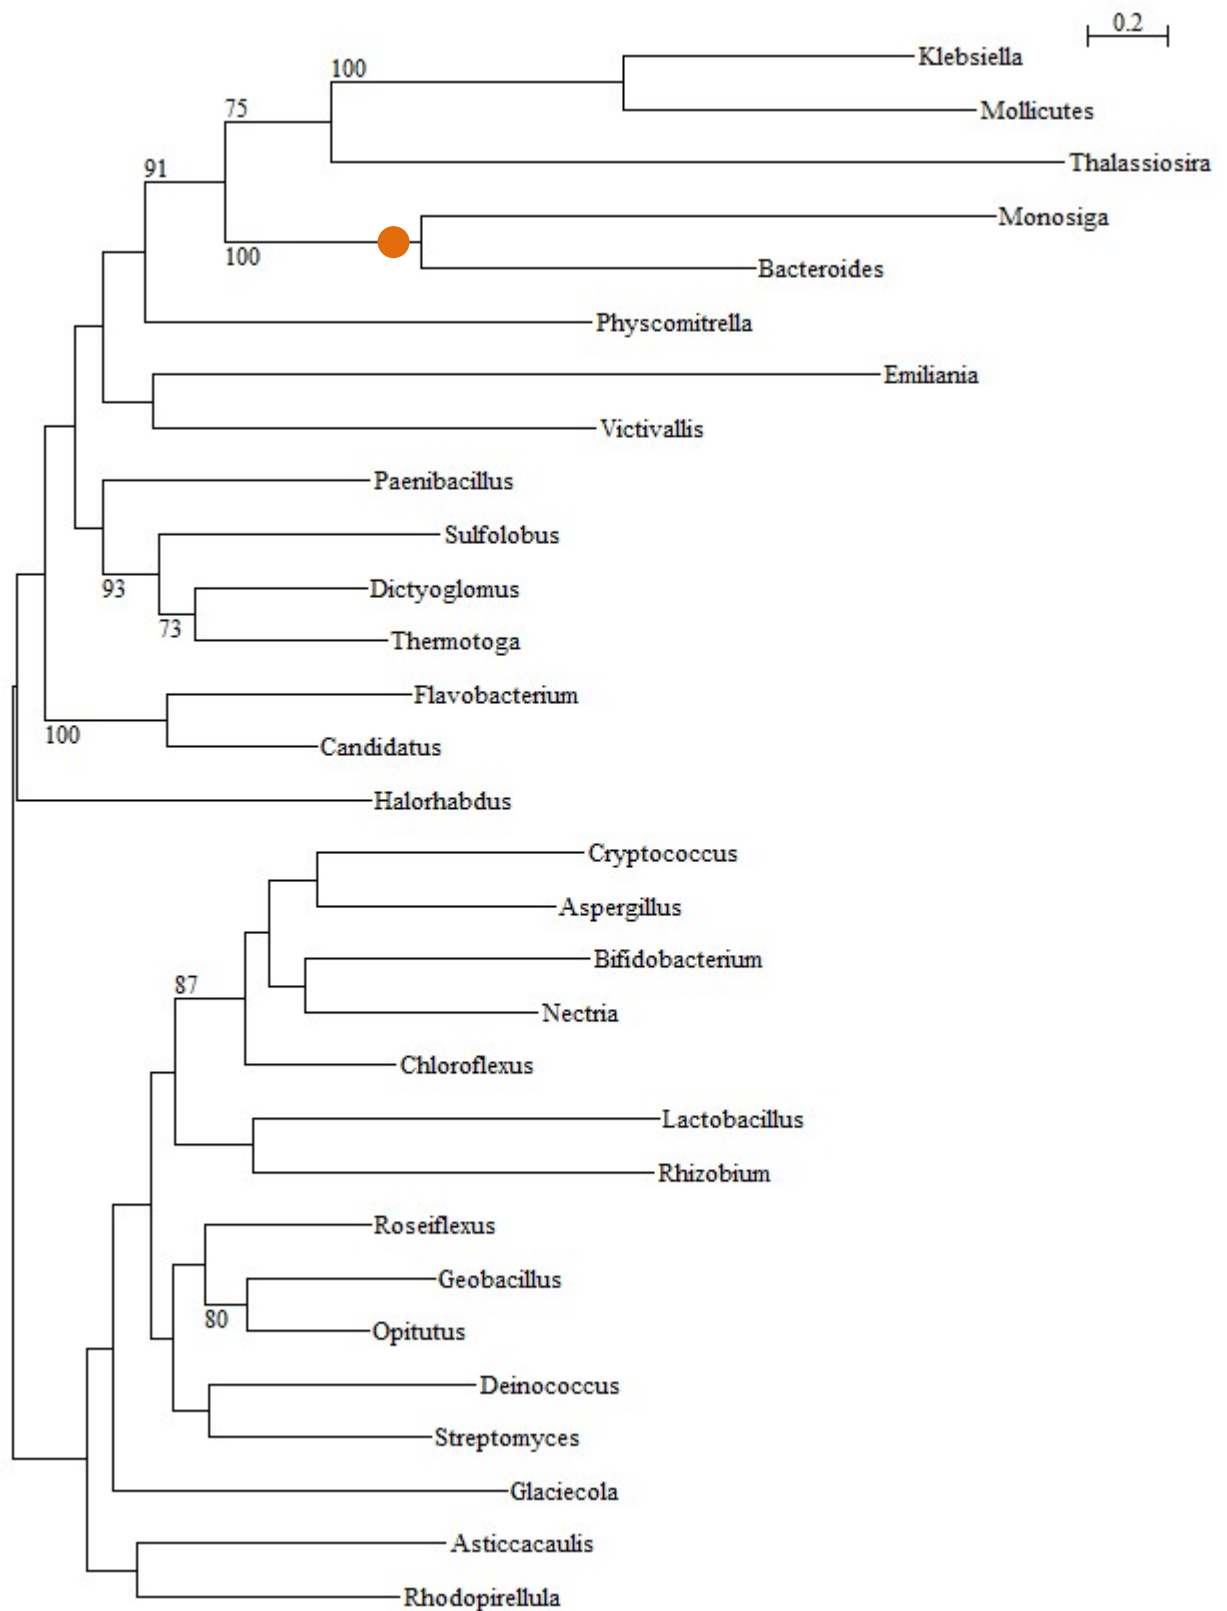

**Figure S22.** Phylogeny of alpha-rhamnosidase (NAD<sup>+</sup>) (GI No. 167524457).

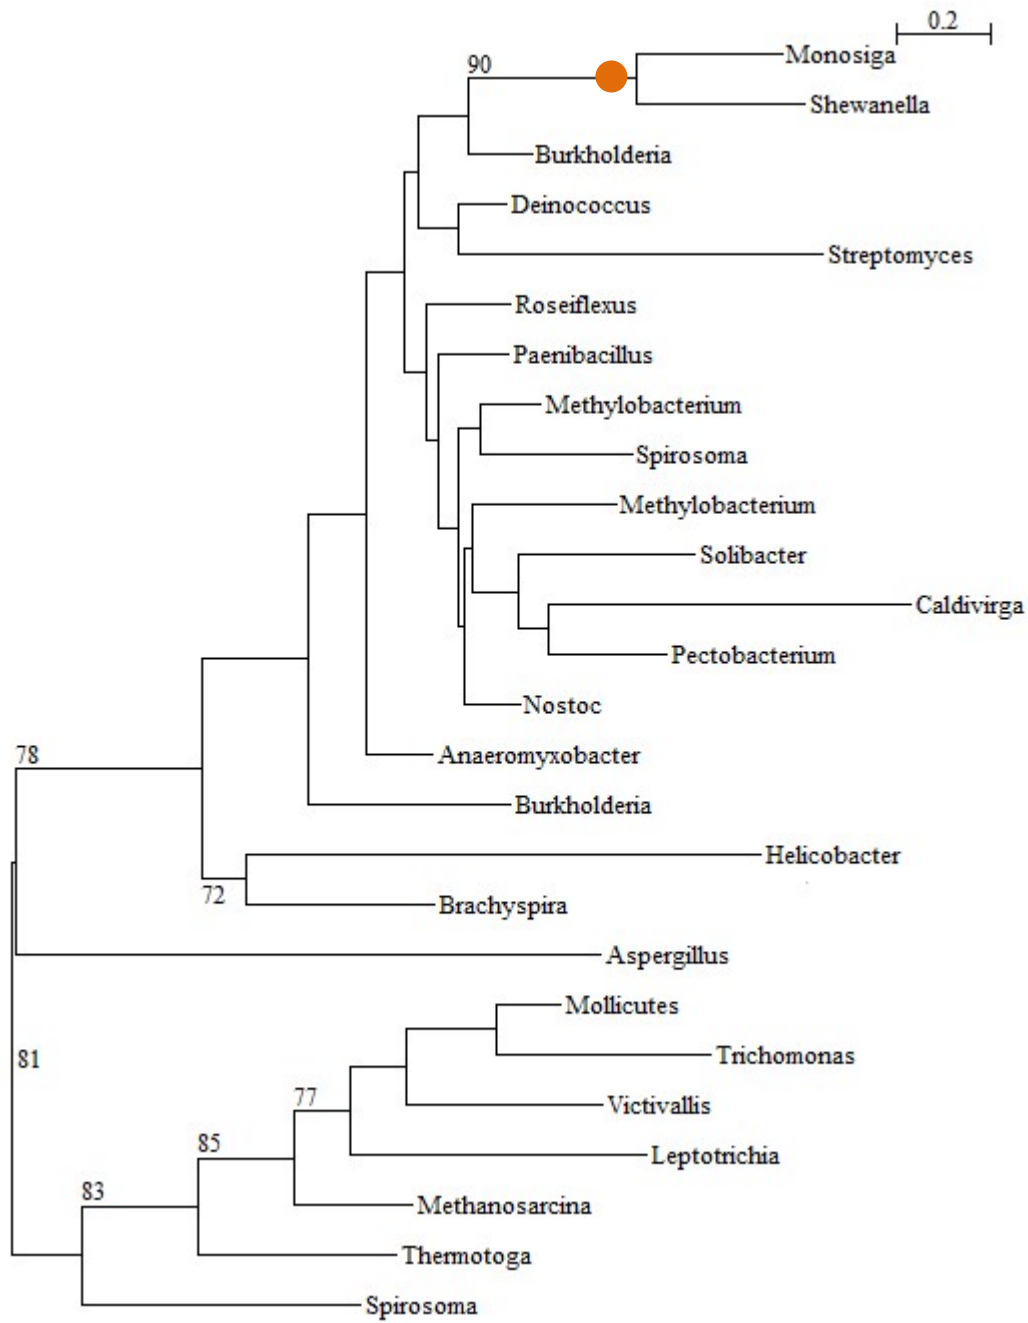

**Figure S23.** Phylogeny of cupin 2 domain-containing protein (GI No. 167527452).

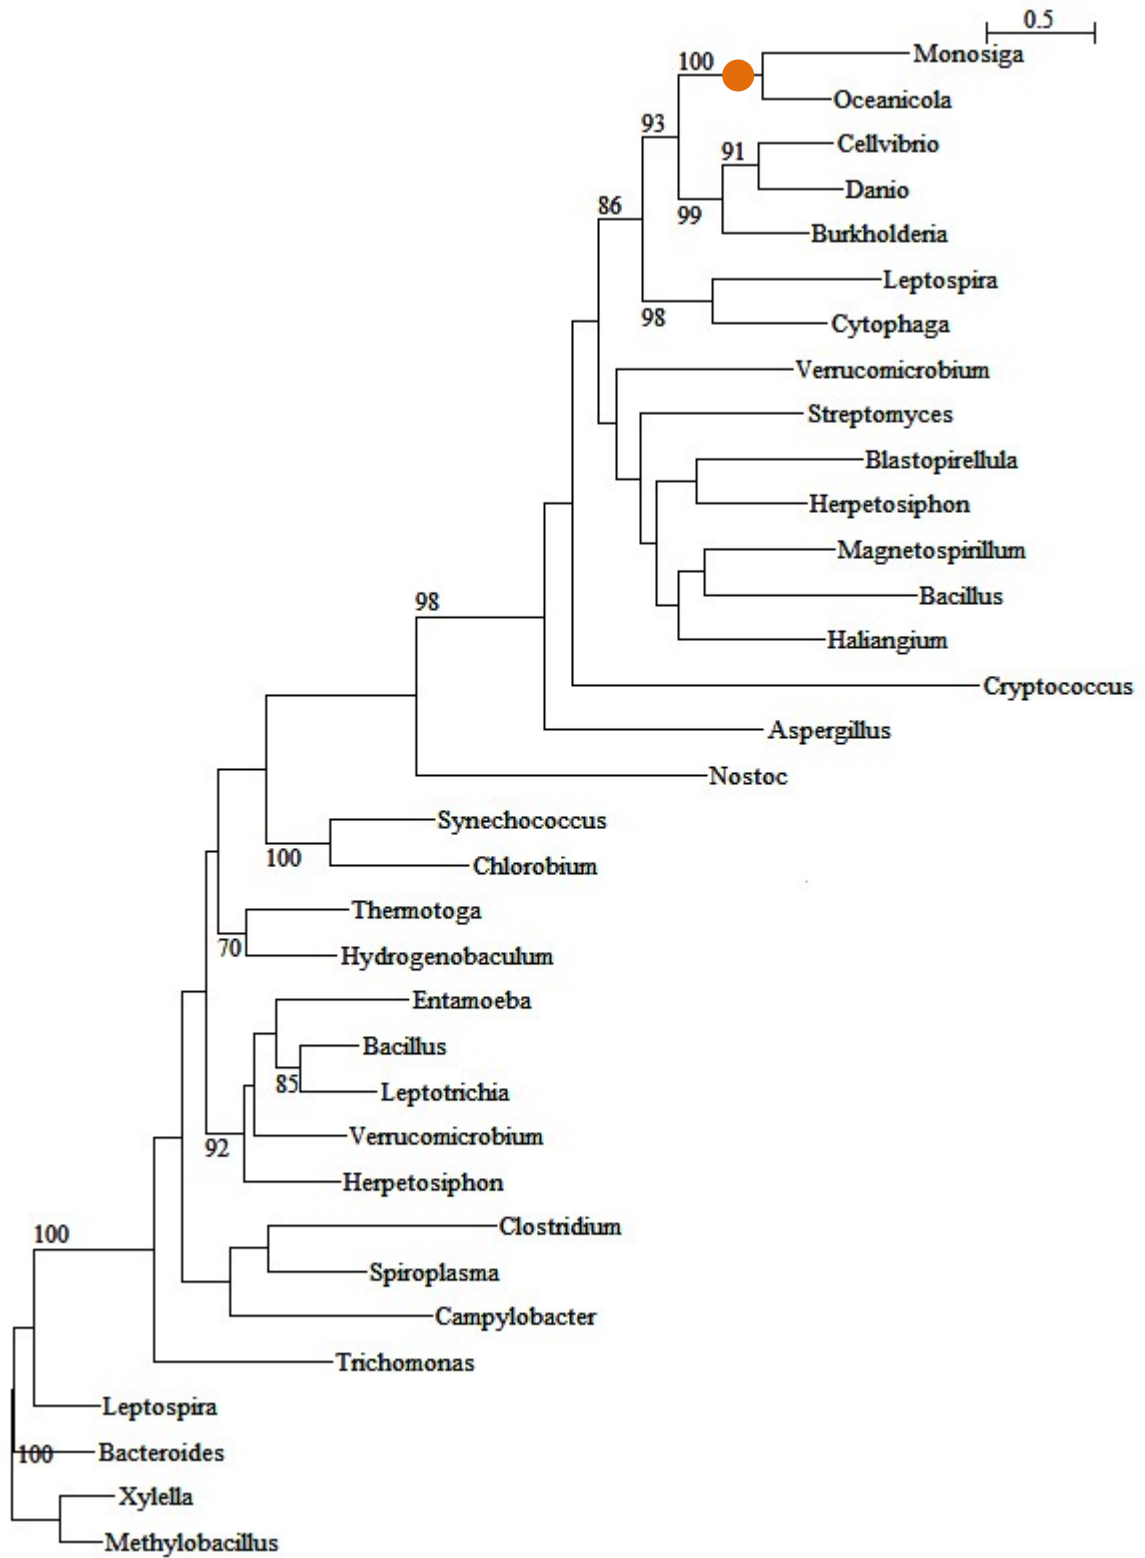

**Figure S24.** Phylogeny of FAD-dependent pyridine nucleotide-disulphide oxidoreductase (GI No. 167523218).



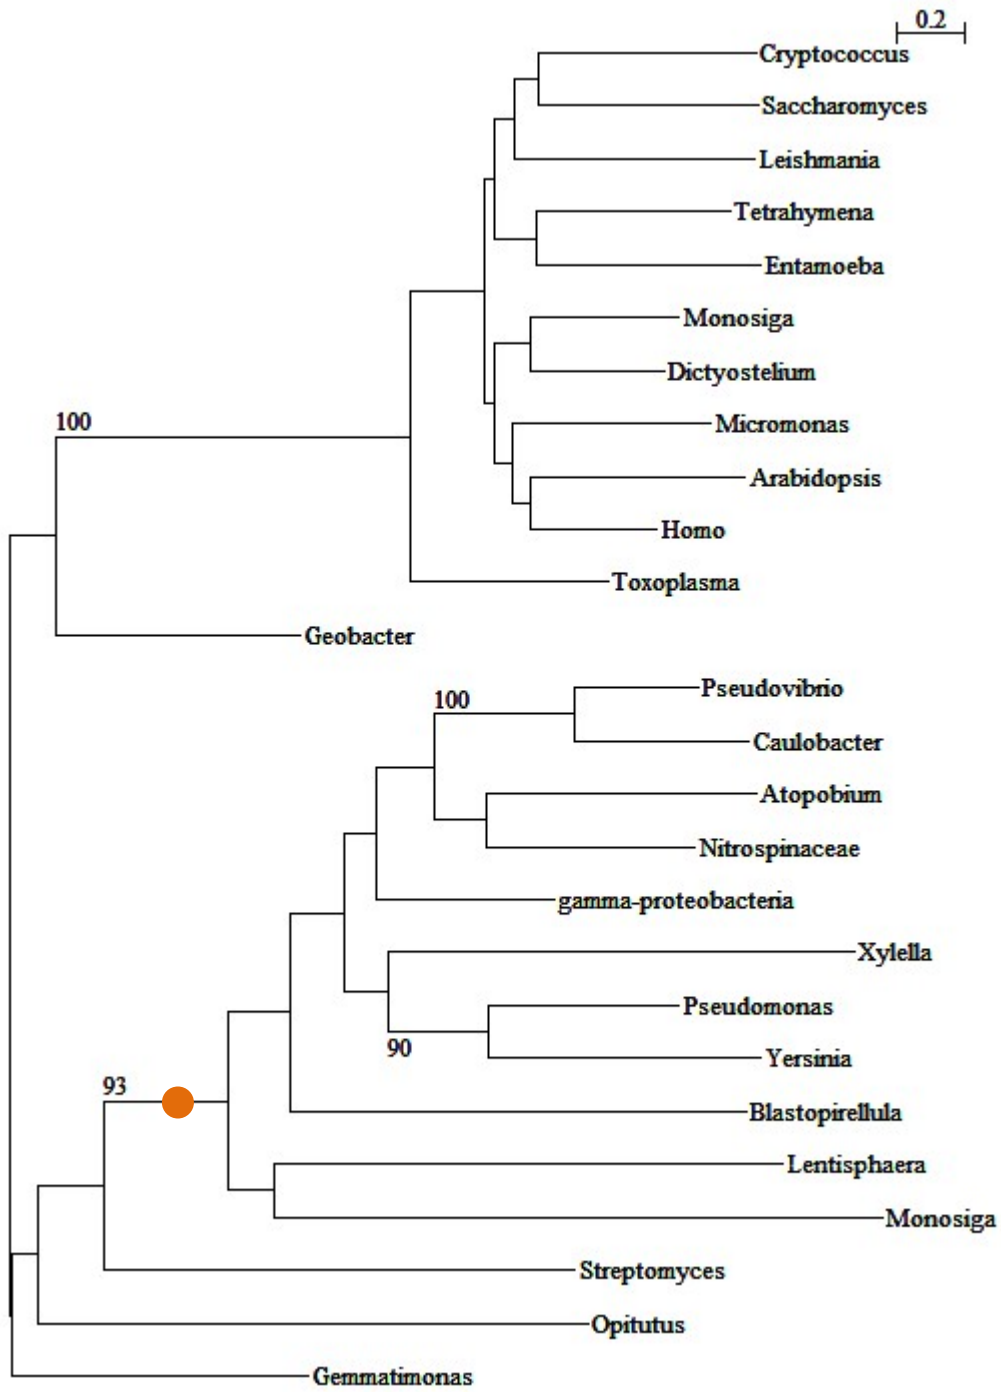

**Figure S25.** Phylogeny of ribonuclease D (GI No. 167533742).

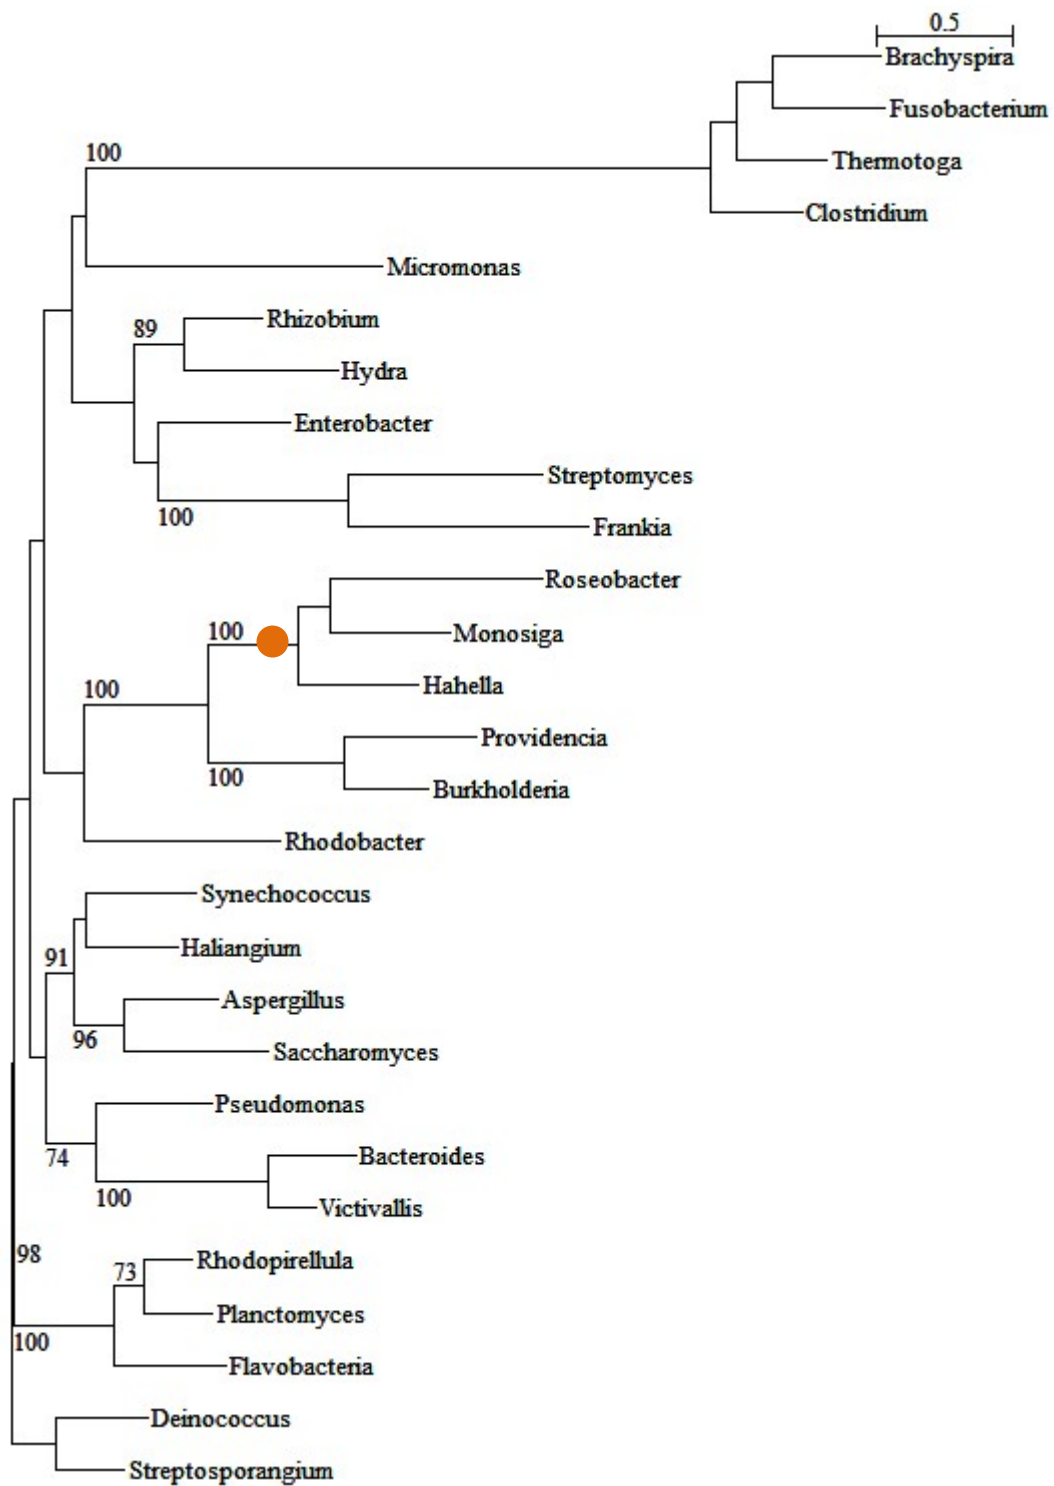

**Figure S26.** Phylogeny of mannitol-1-phosphate/altronate dehydrogenase (GI No. 167537946).

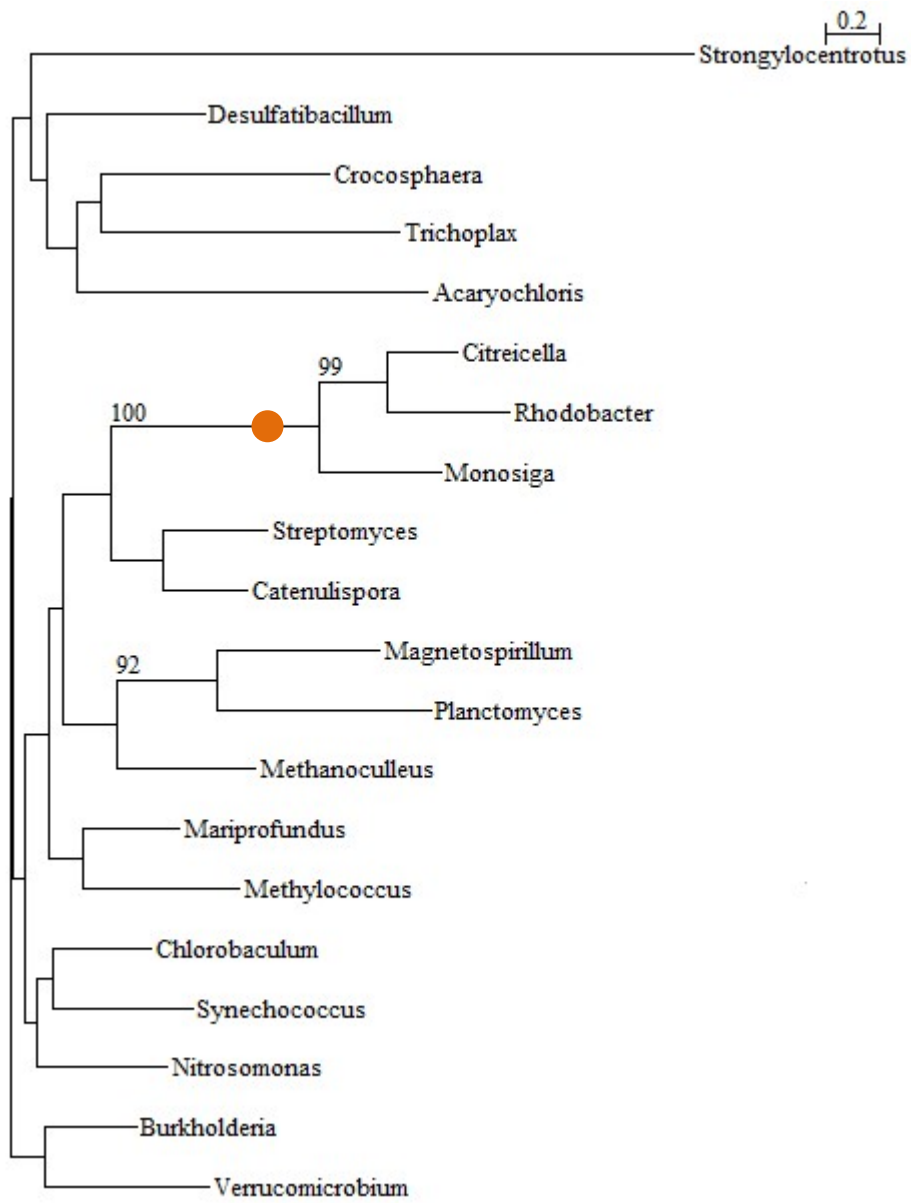

**Figure S27.** Phylogeny of acetyltransferase (GI No. 167525825).

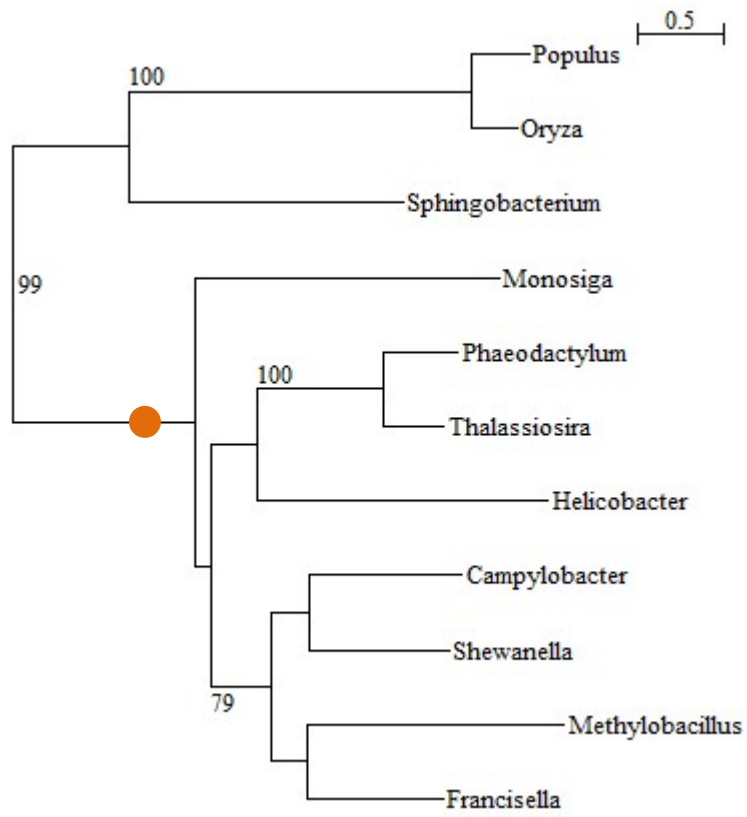

**Figure S28.** Phylogeny of one hypothetical protein (GI No. 167534537).

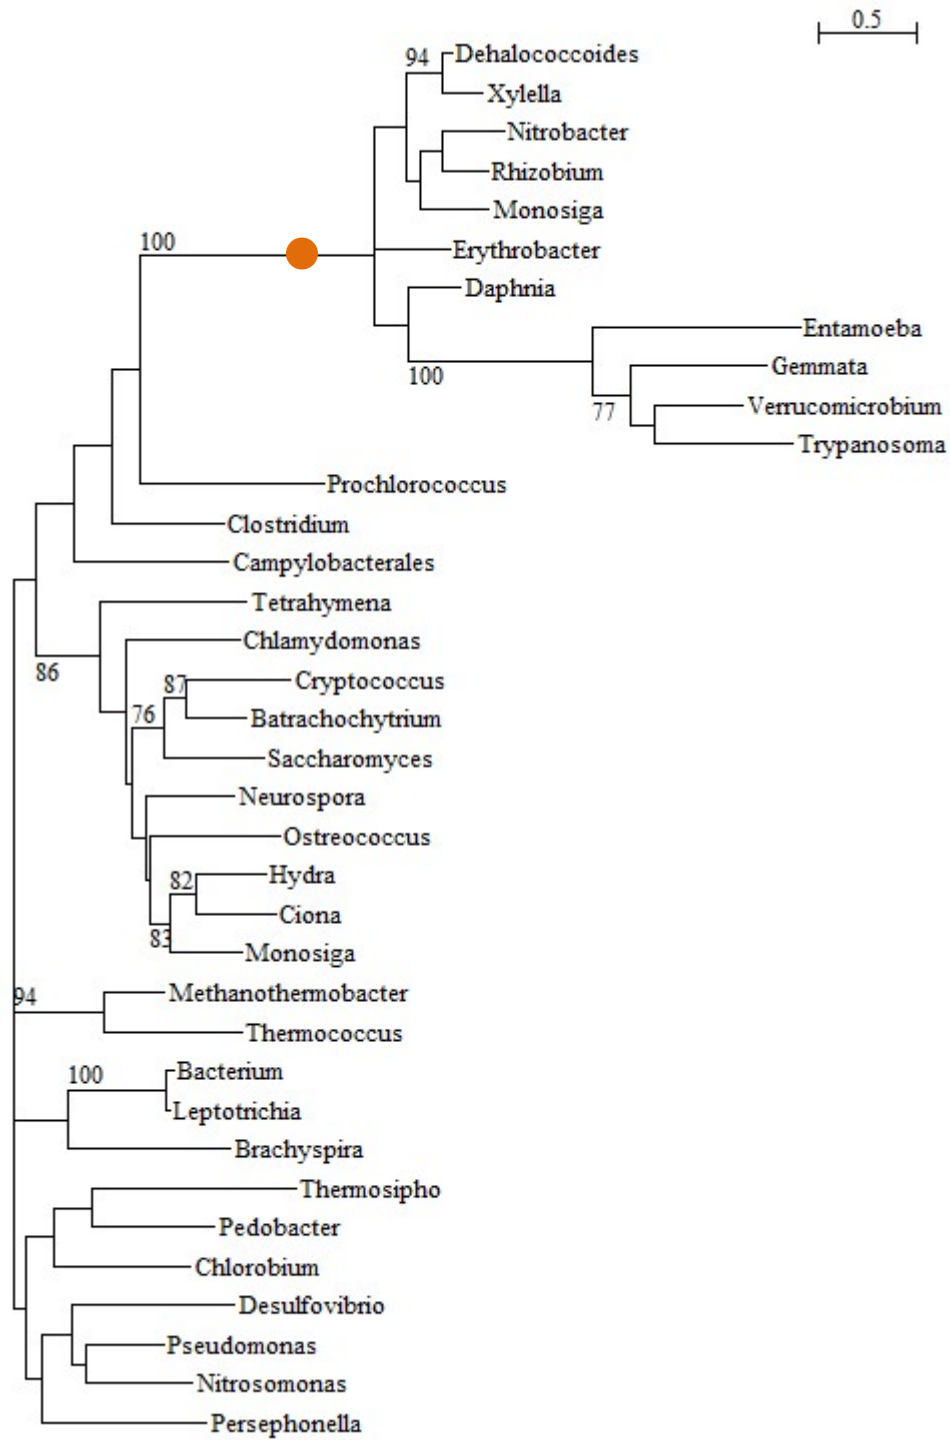

**Figure S29.** Phylogeny of inorganic polyphosphate/ATP-NAD kinase (GI No. 167516892).

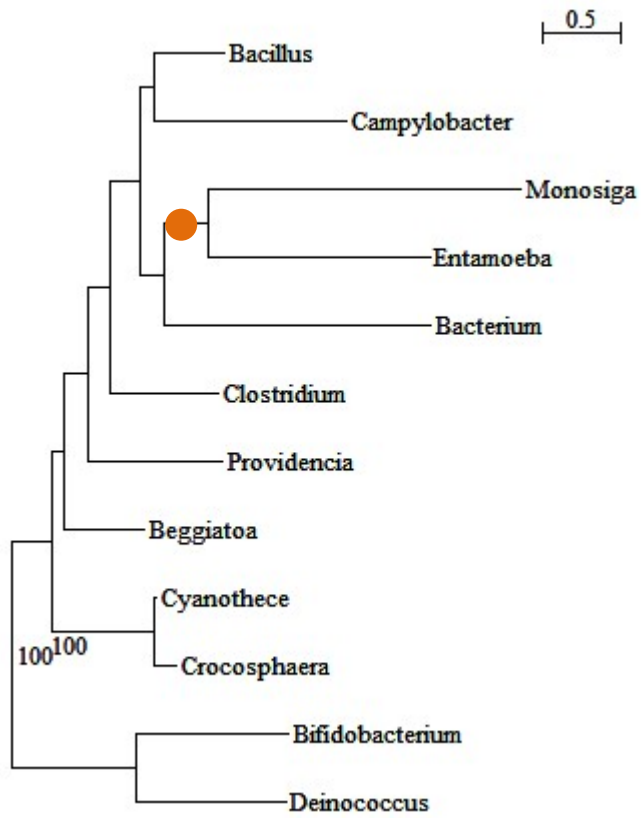

**Figure S30.** Phylogeny of one hypothetical protein (GI No. 167519801).

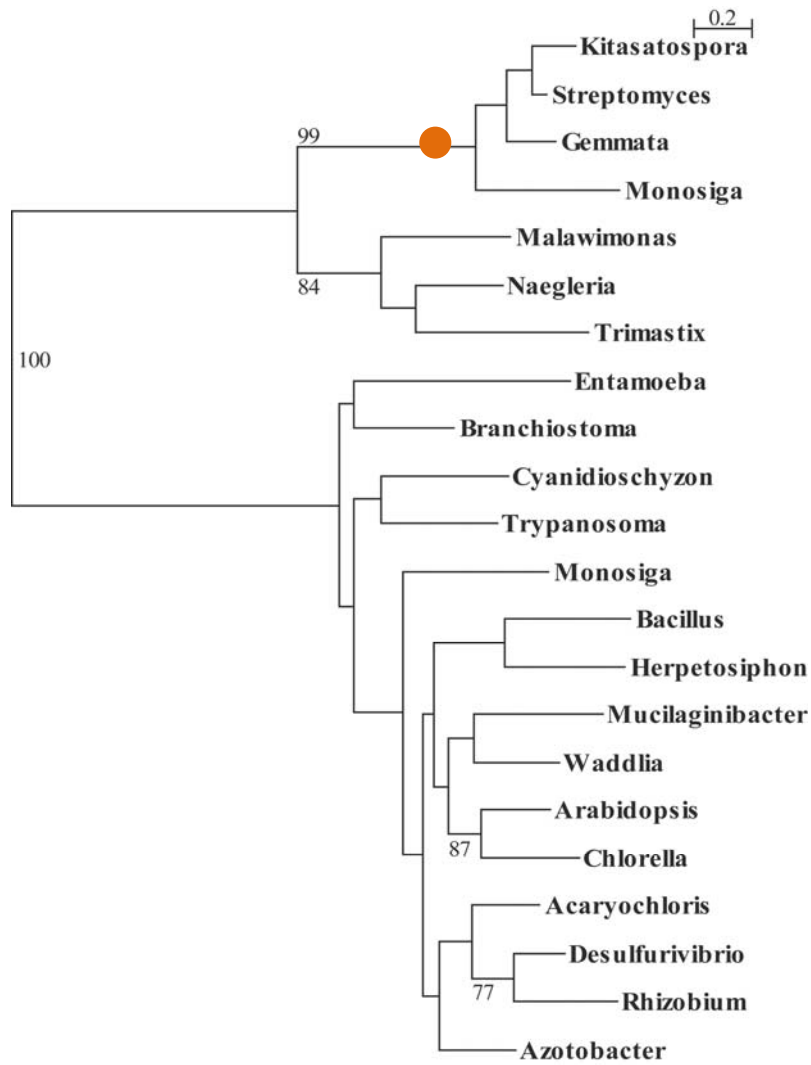

**Figure S31.** Phylogeny of Uracil-DNA glycosylase (GI No. 167535167).

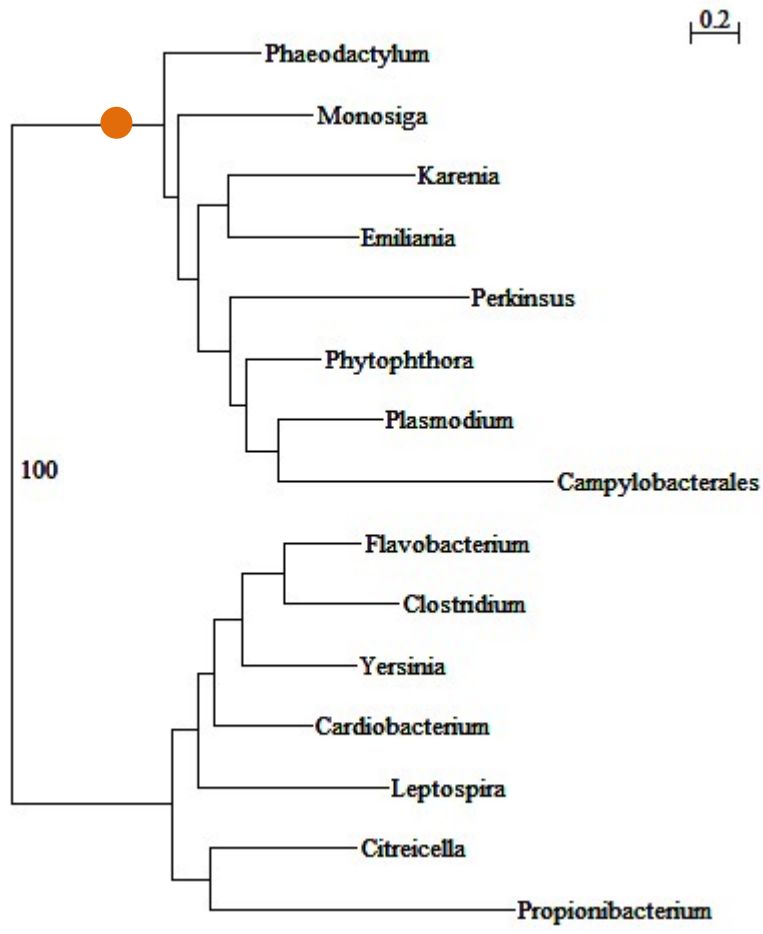

**Figure S32.** Phylogeny of Leu/Phe-tRNA protein transferase (GI No. 167536799).



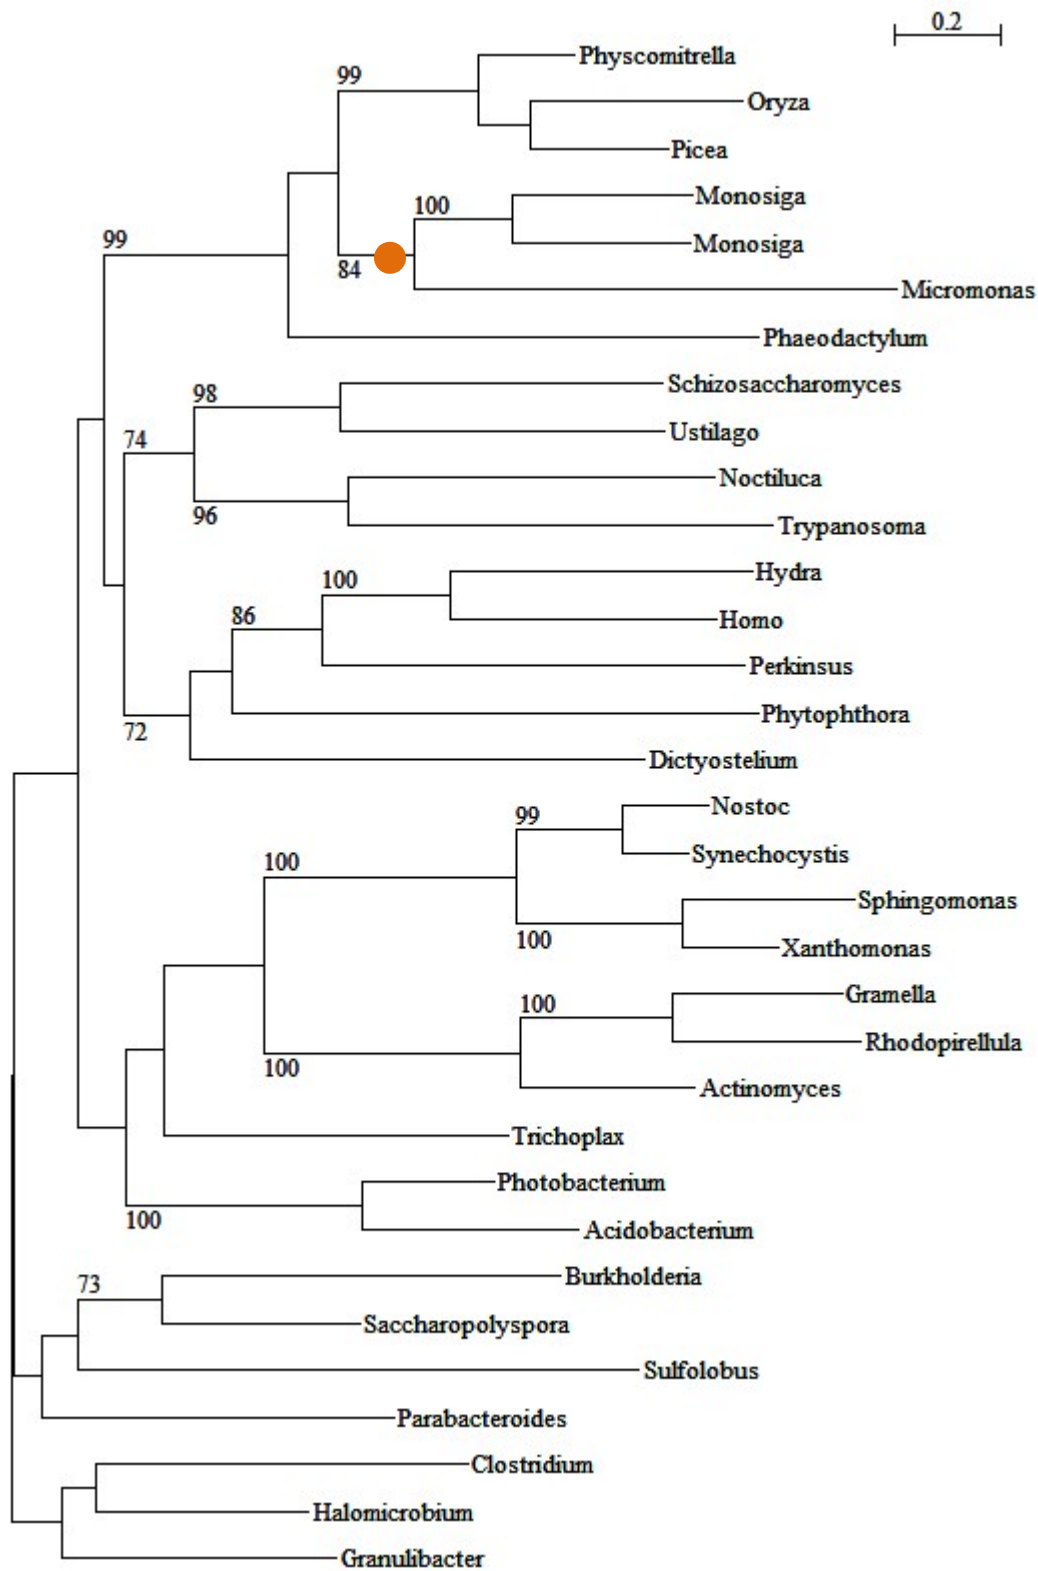

**Figure S33.** Phylogeny of sorbitol transporter (GI No. 167523619 and 167521355).

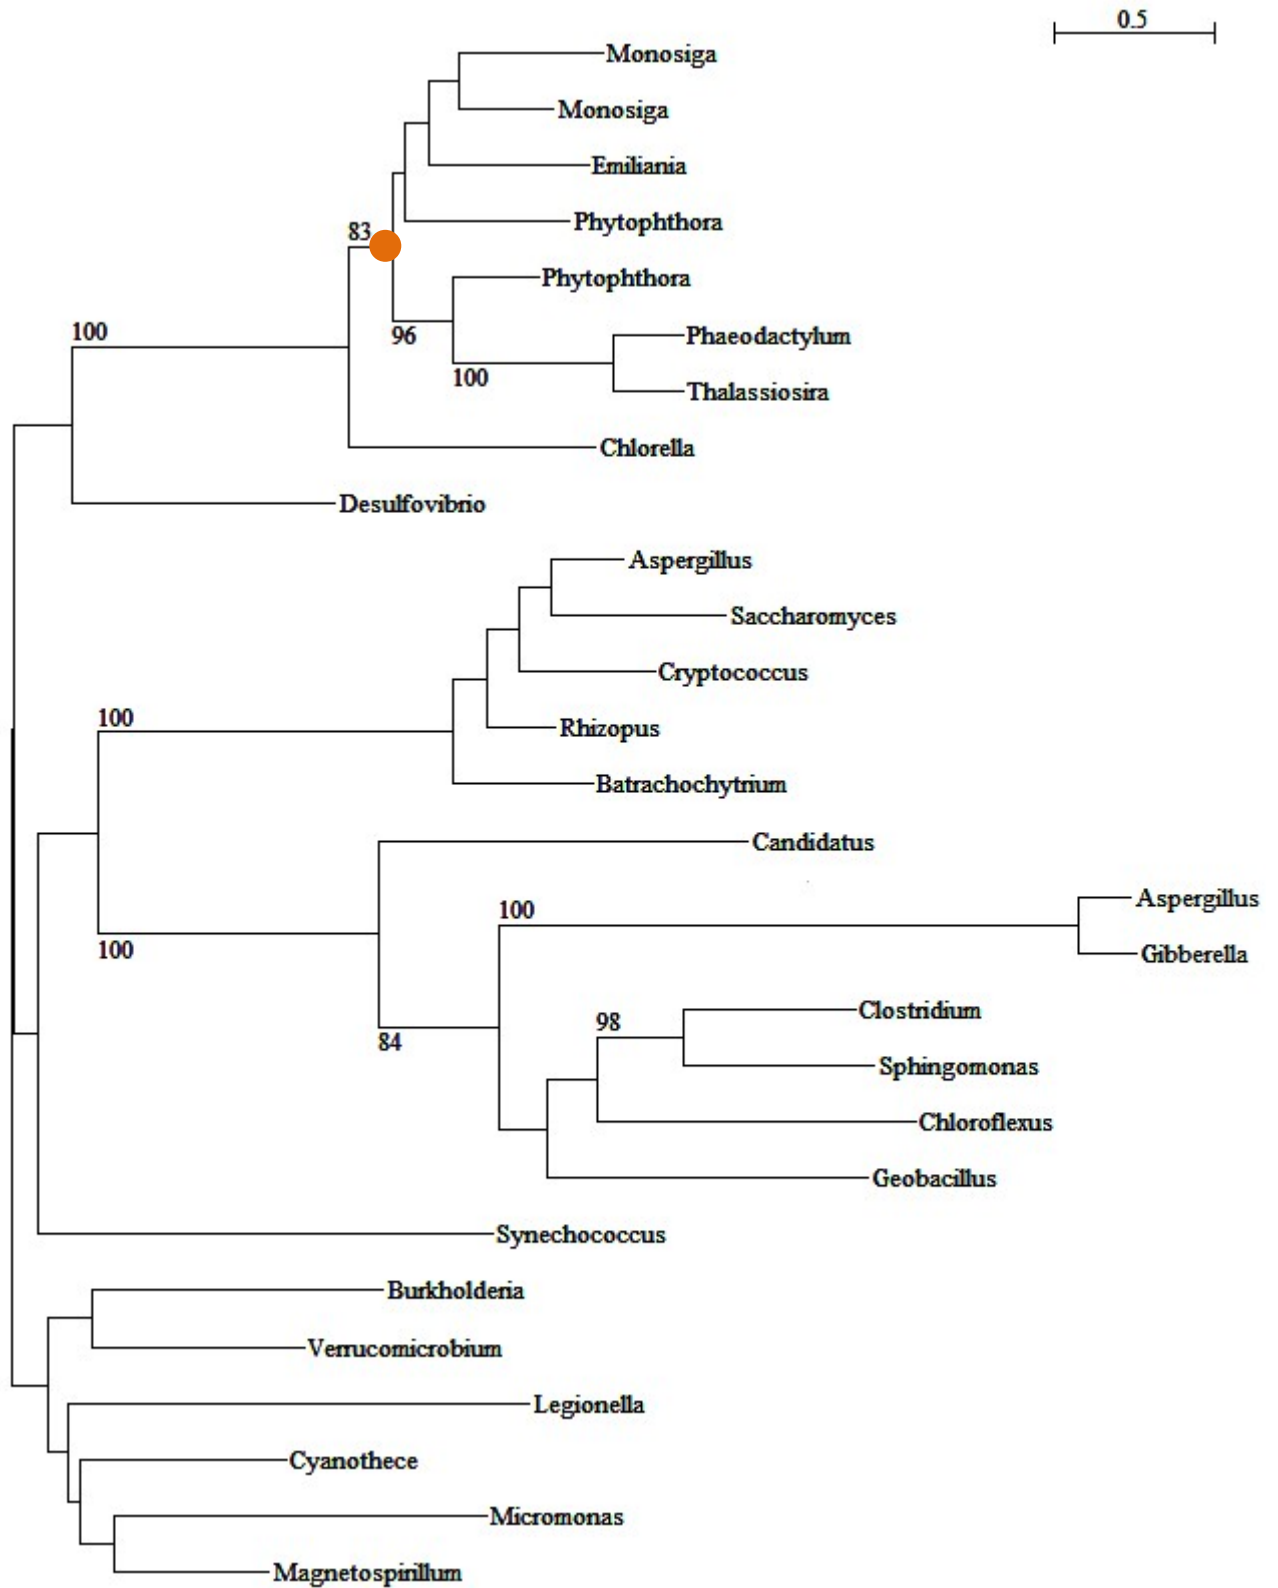

**Figure S34.** Phylogeny of sulphate transporter (GI No. 167534551 and 167518067).

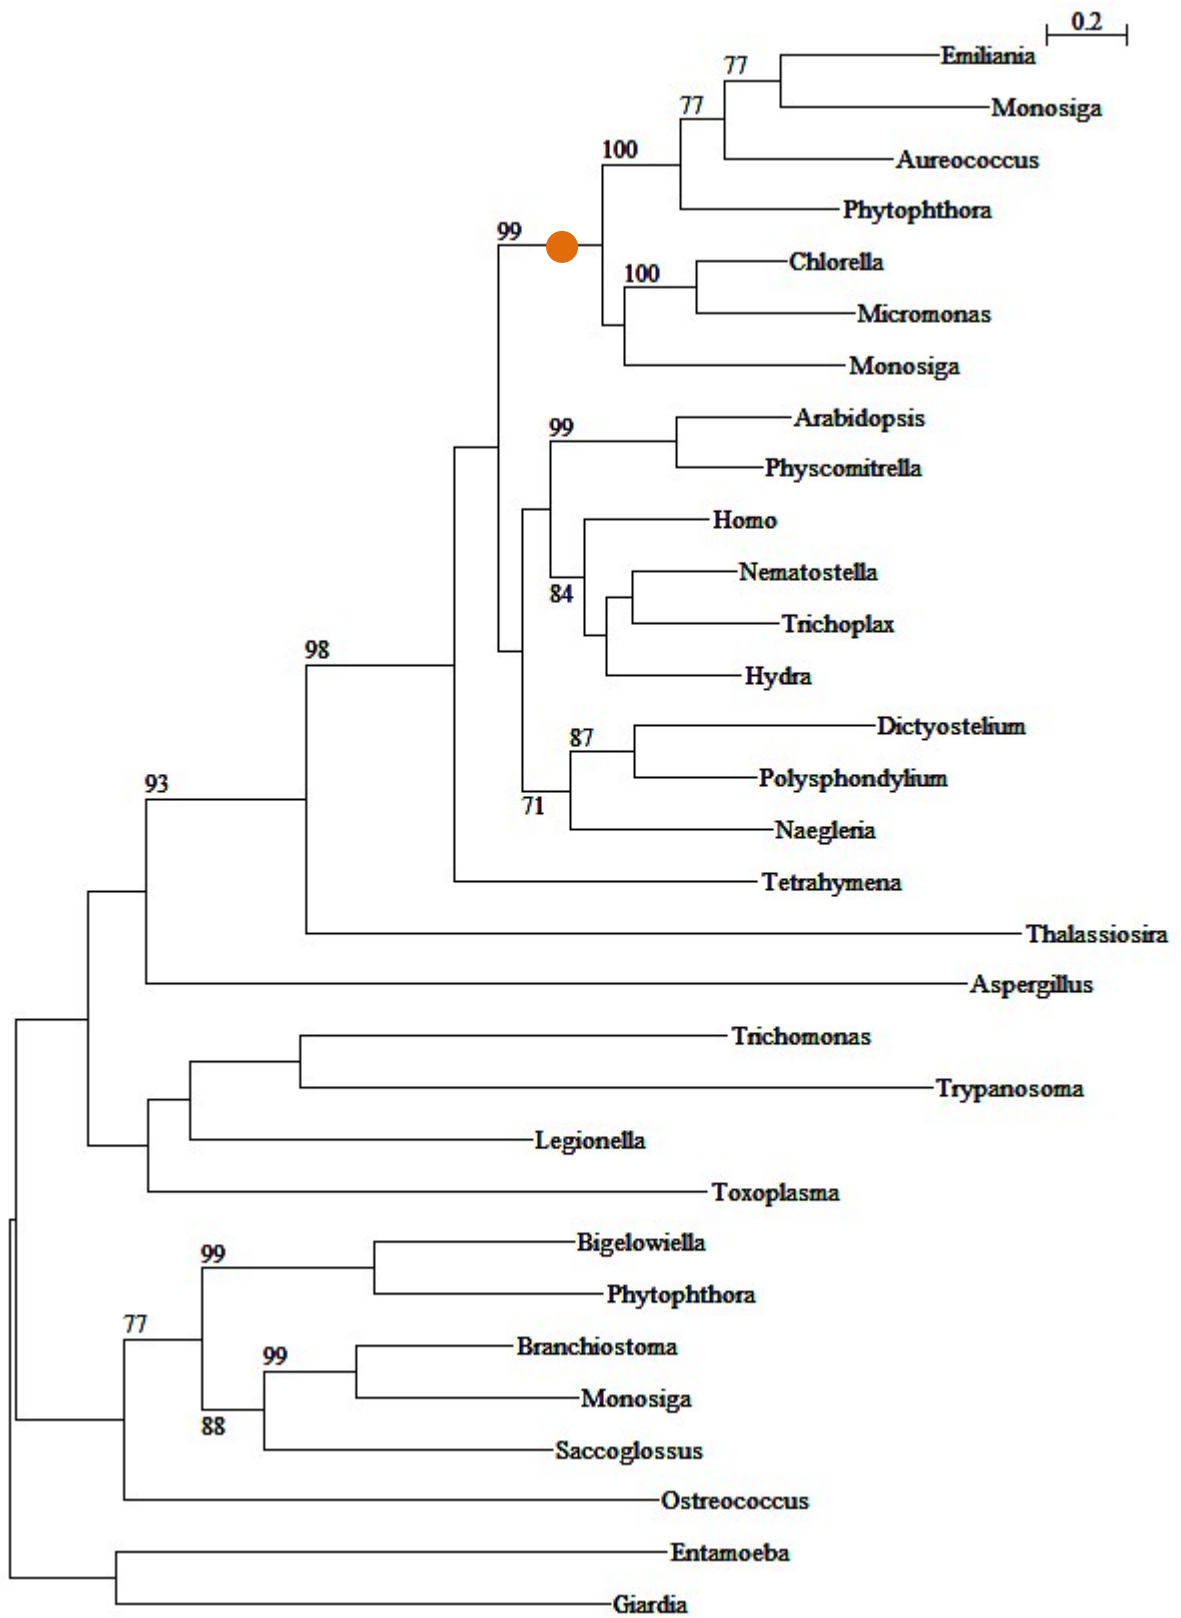

**Figure S35.** Phylogeny of serine carboxypeptidase (Gi No. 167534702 and 167533602).

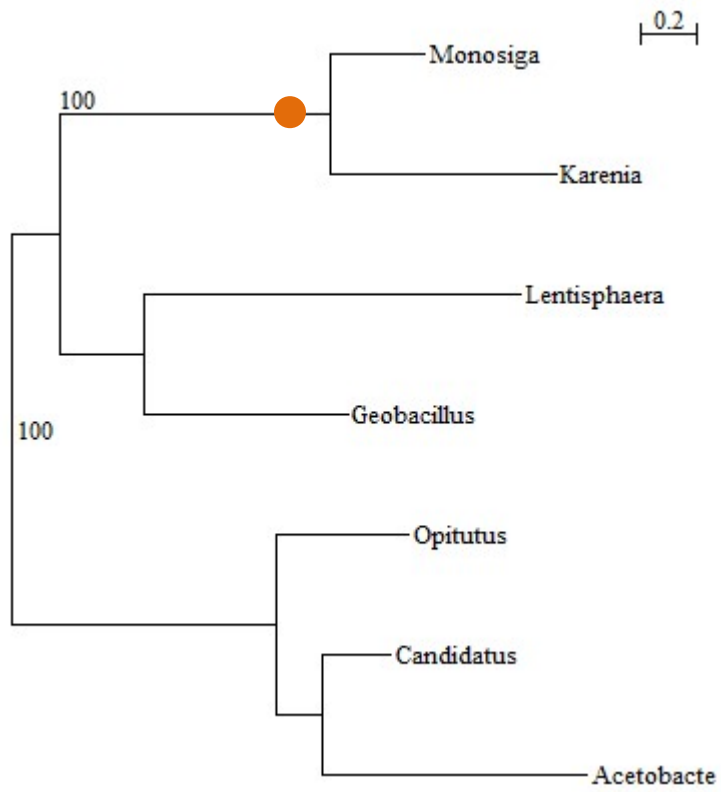

**Figure S36.** Phylogeny of one hypothetical protein (GI No. 167519849).

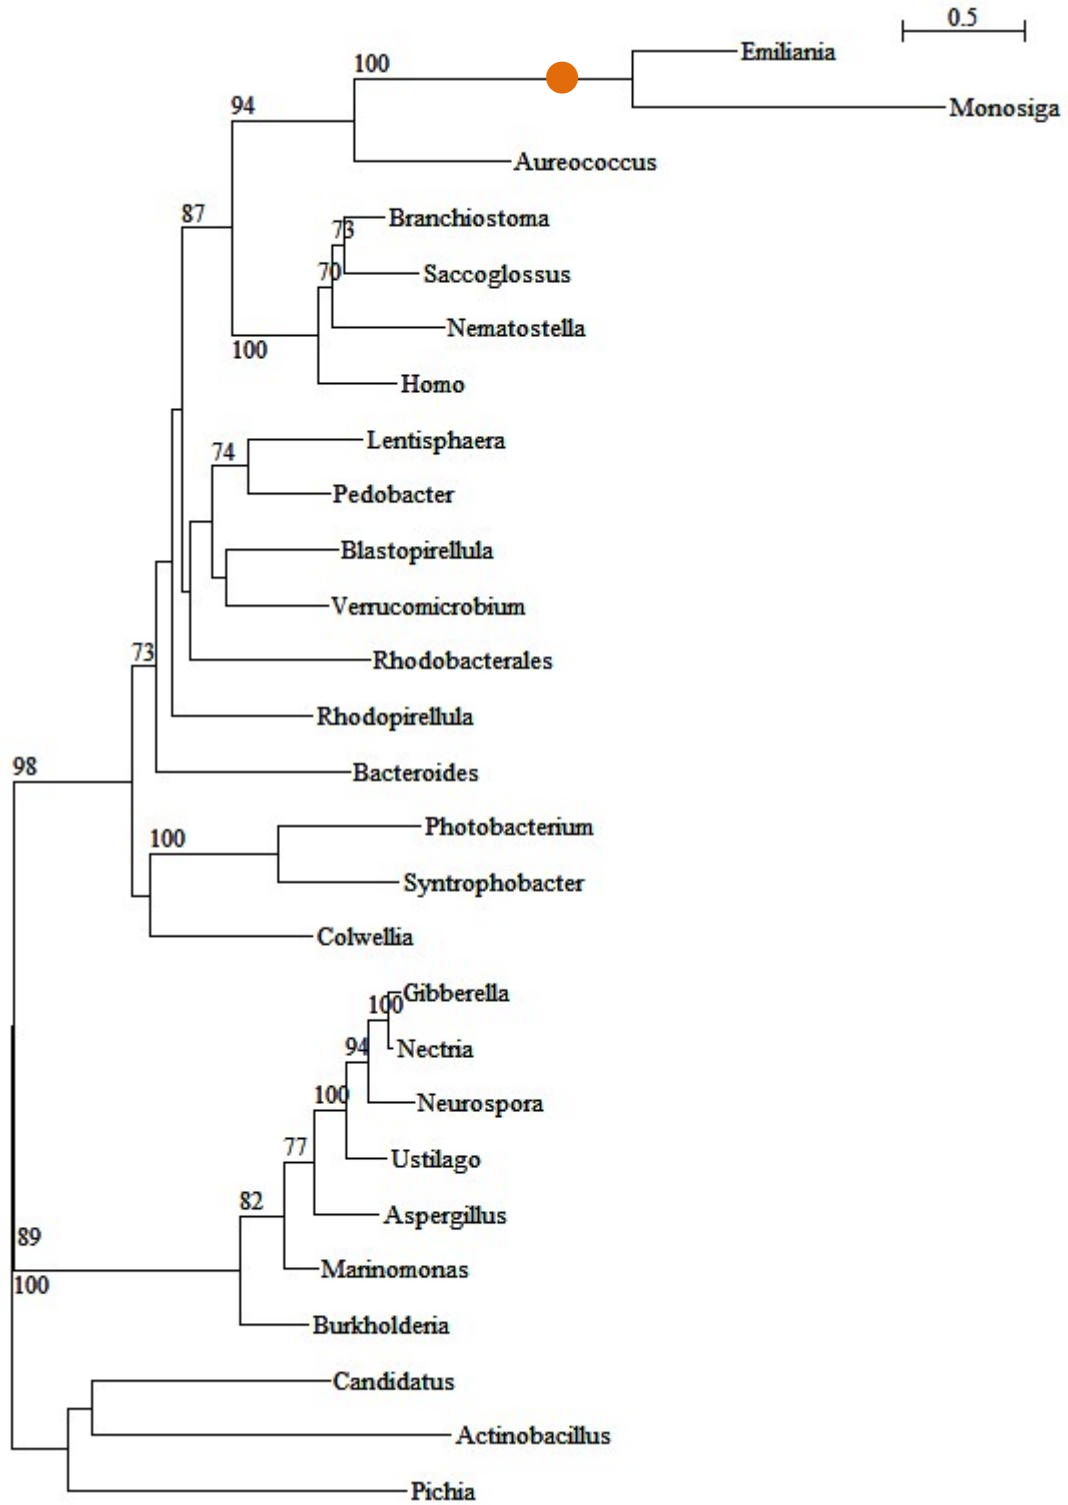

**Figure S37.** Phylogeny of iduronate-2-sulfatase (GI No. 167524240).

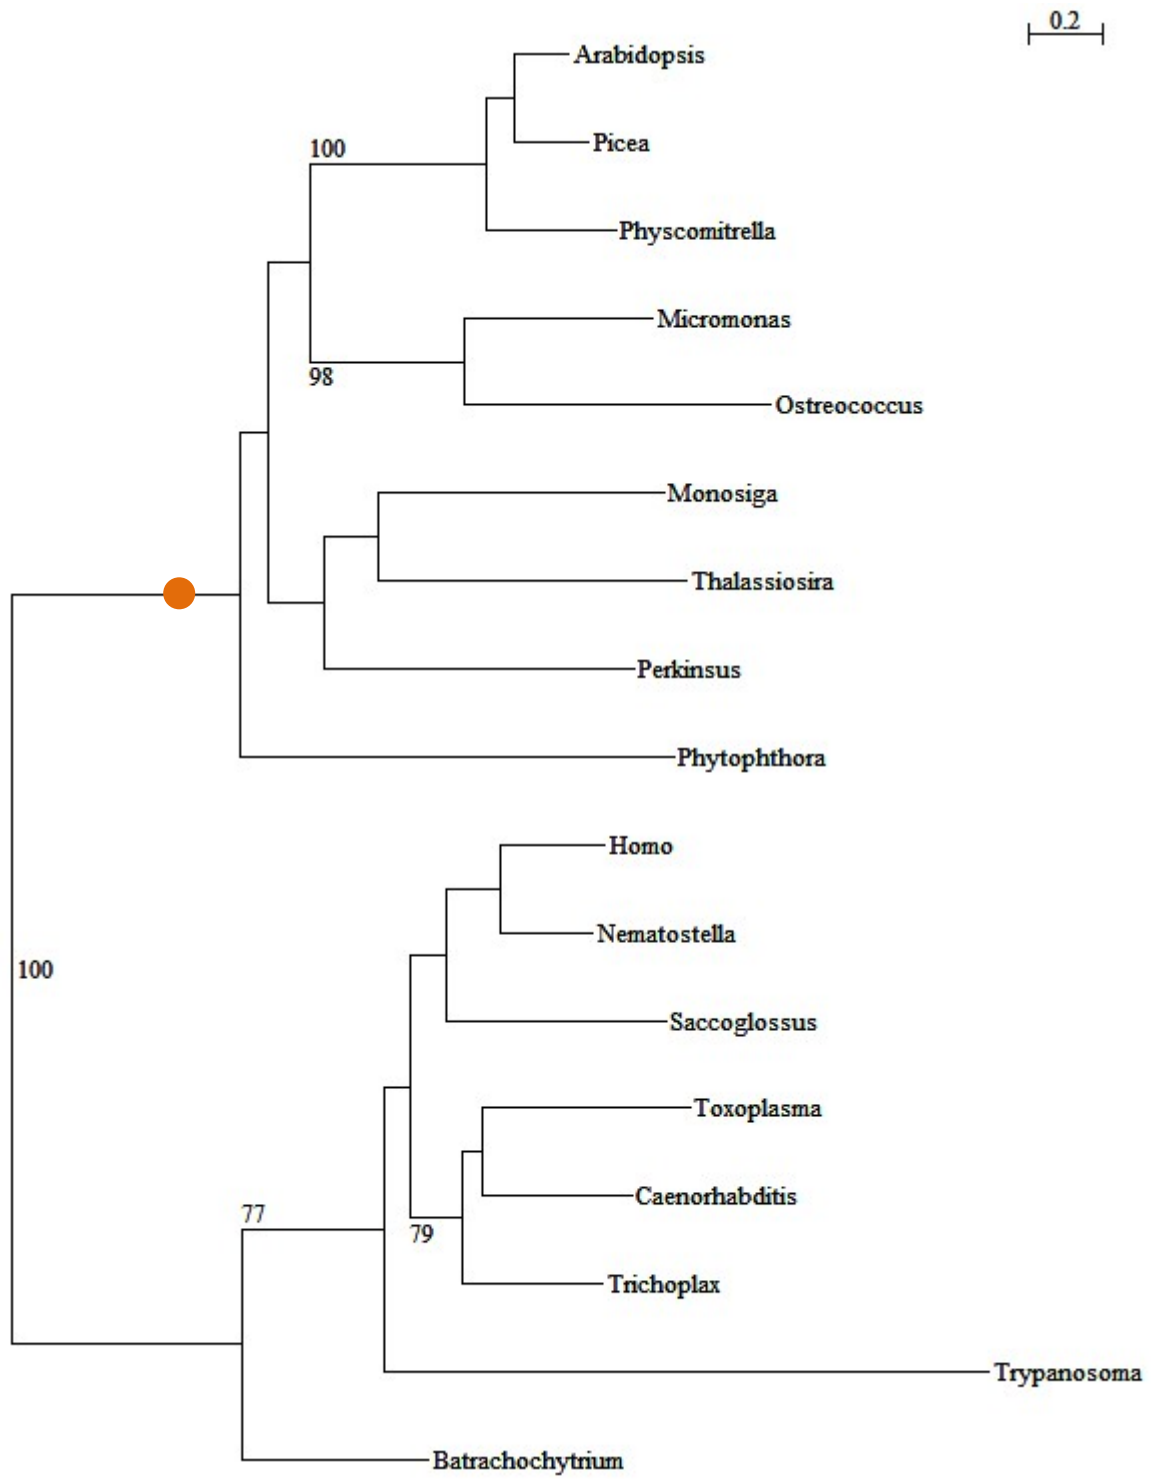

**Figure S38.** Phylogeny of UDP-galactose translocator (GI No. 167527303).

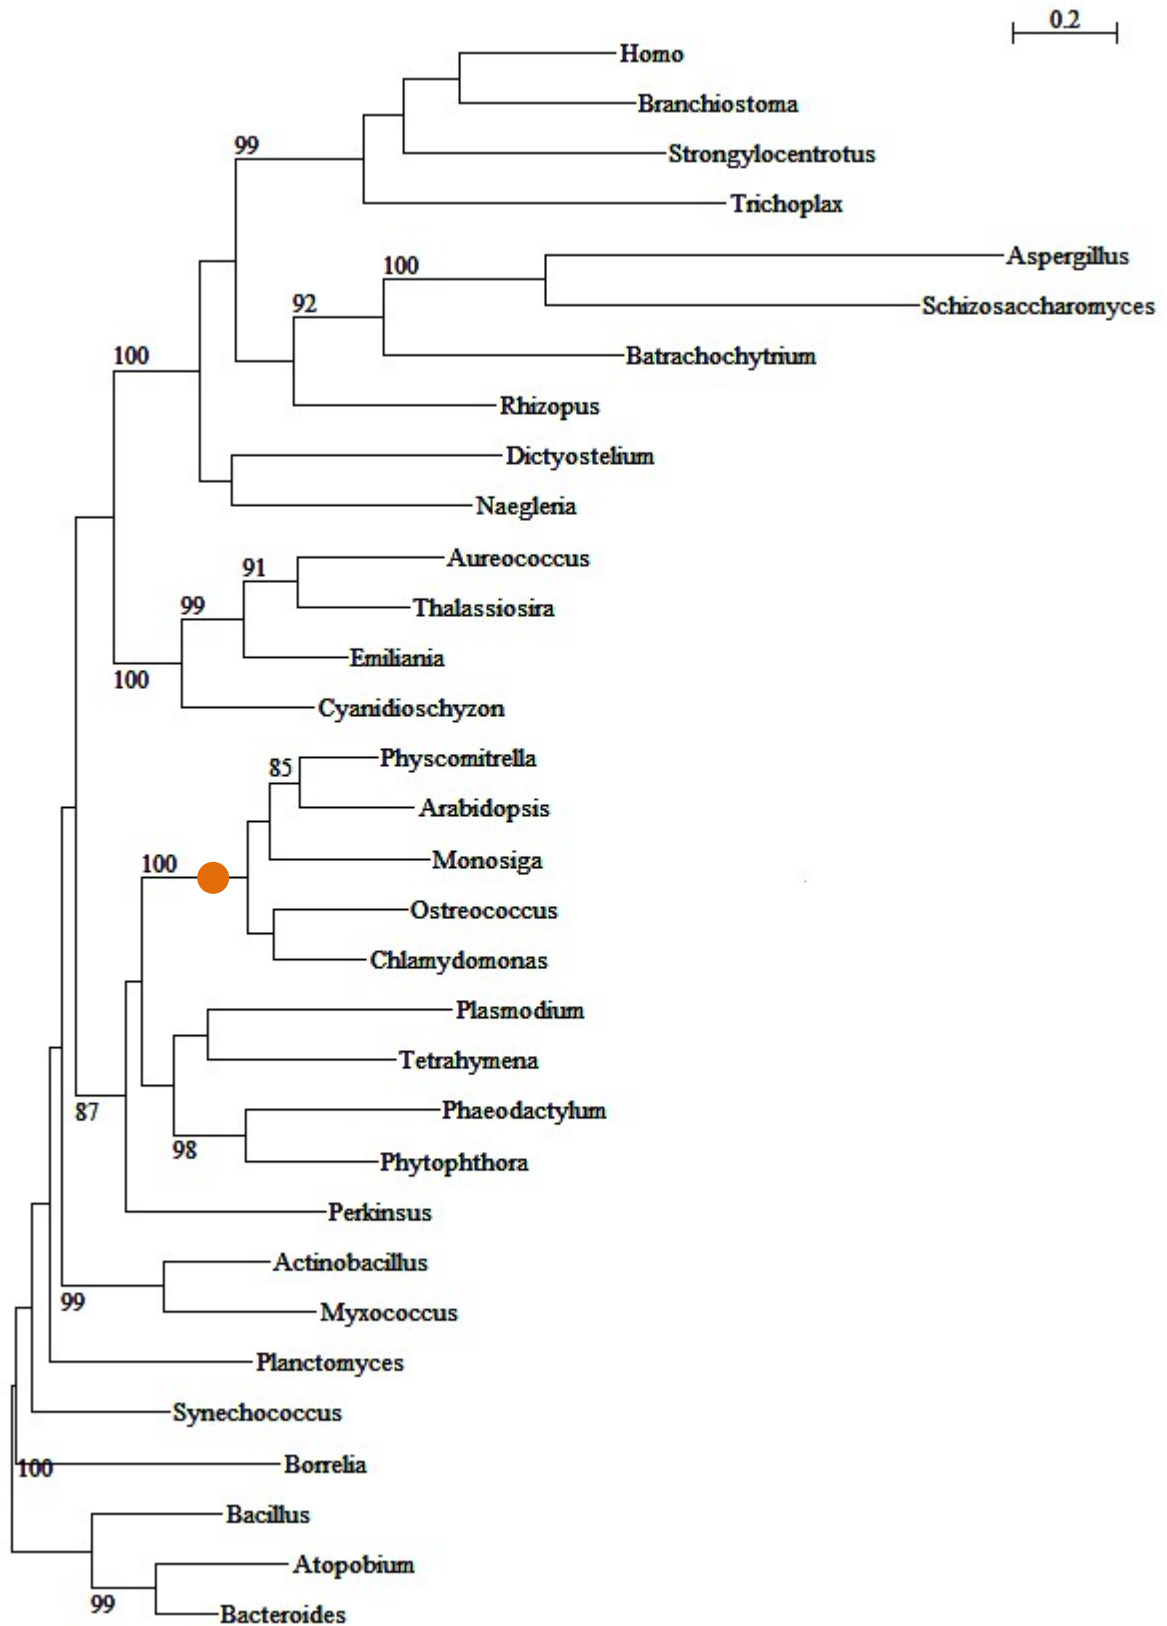

**Figure S39.** Phylogeny of asparaginyl-tRNA synthetase (GI No. 167527404).

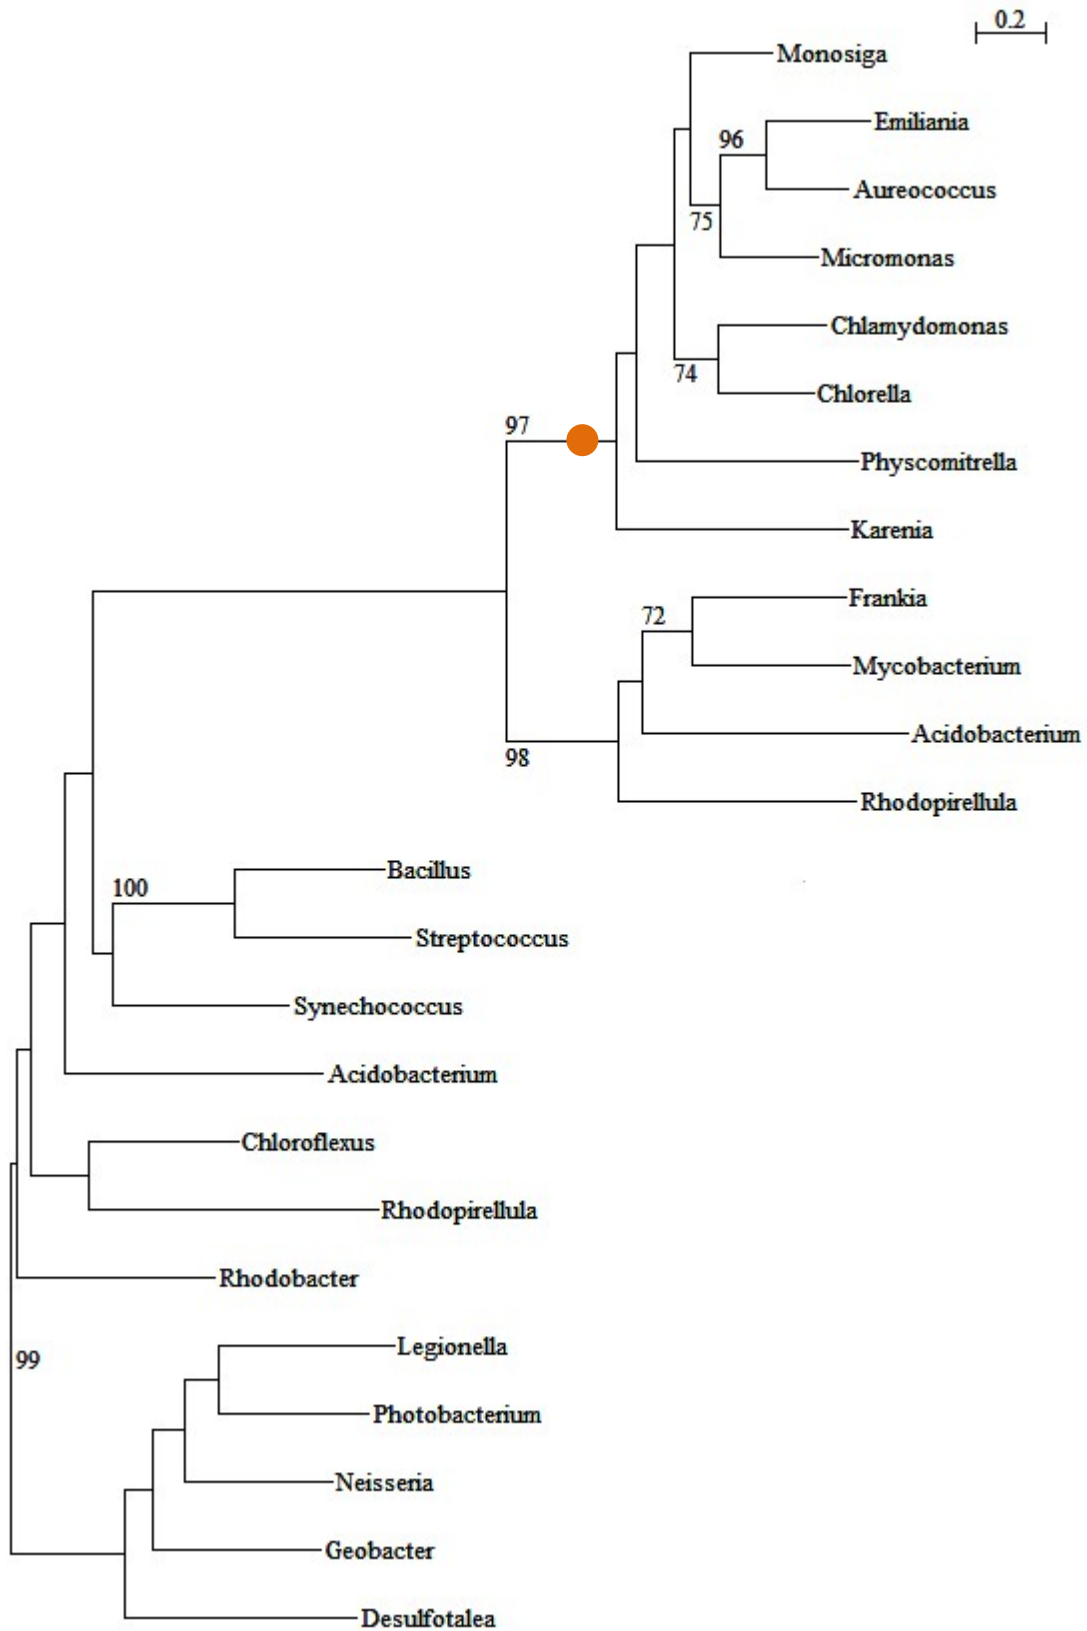

**Figure S40.** Phylogeny of DNA glycosylase (GI No. 167535061).



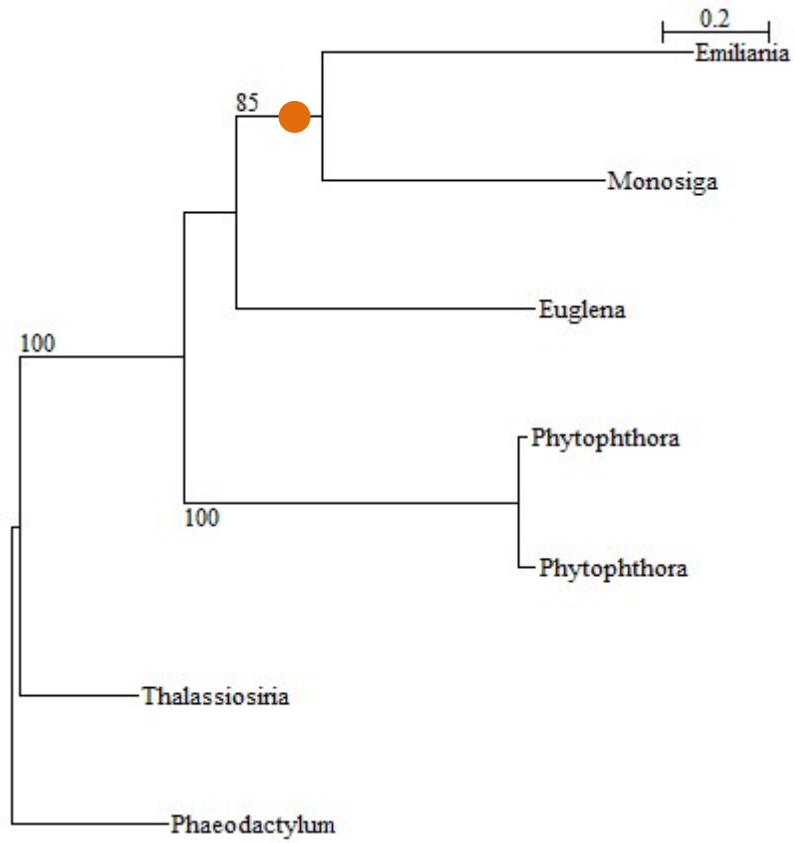

**Figure S41.** Phylogeny of one hypothetical protein (GI No. 167536775).

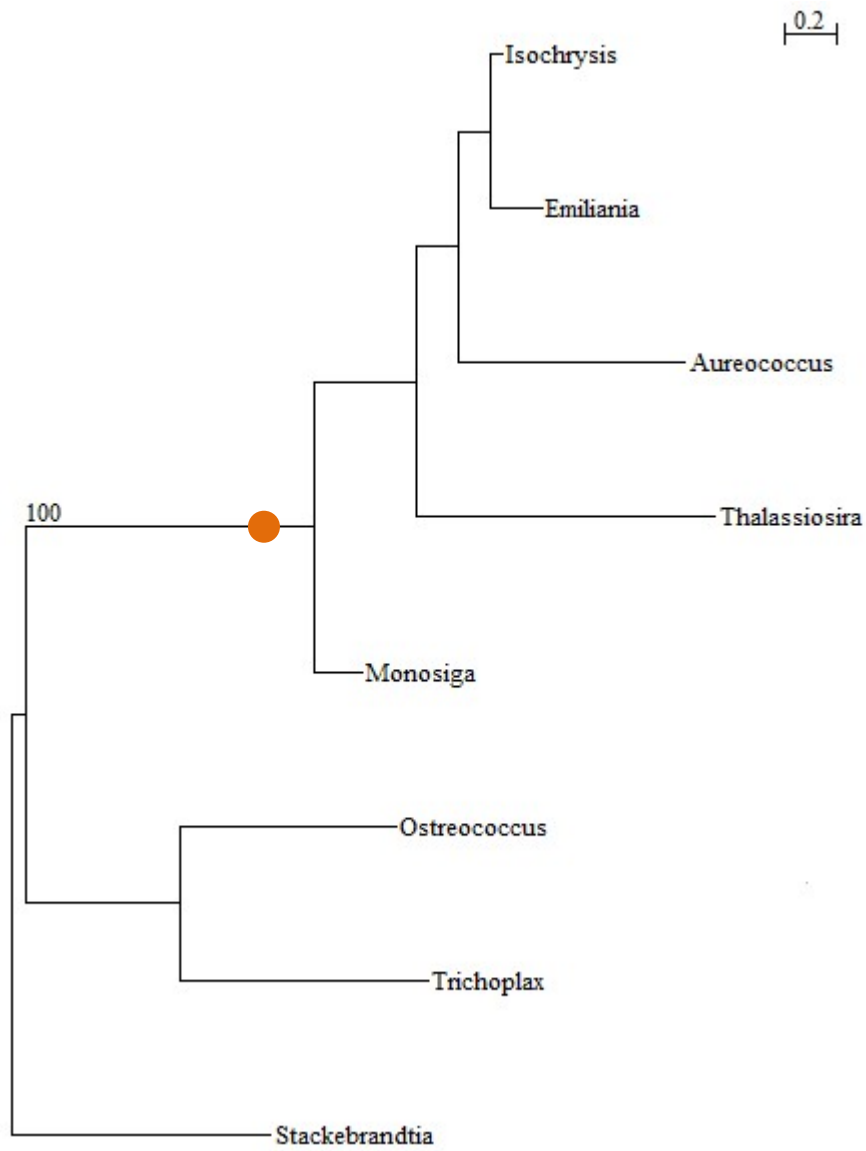

**Figure S42.** Phylogeny of one hypothetical protein (GI No. 167524032).

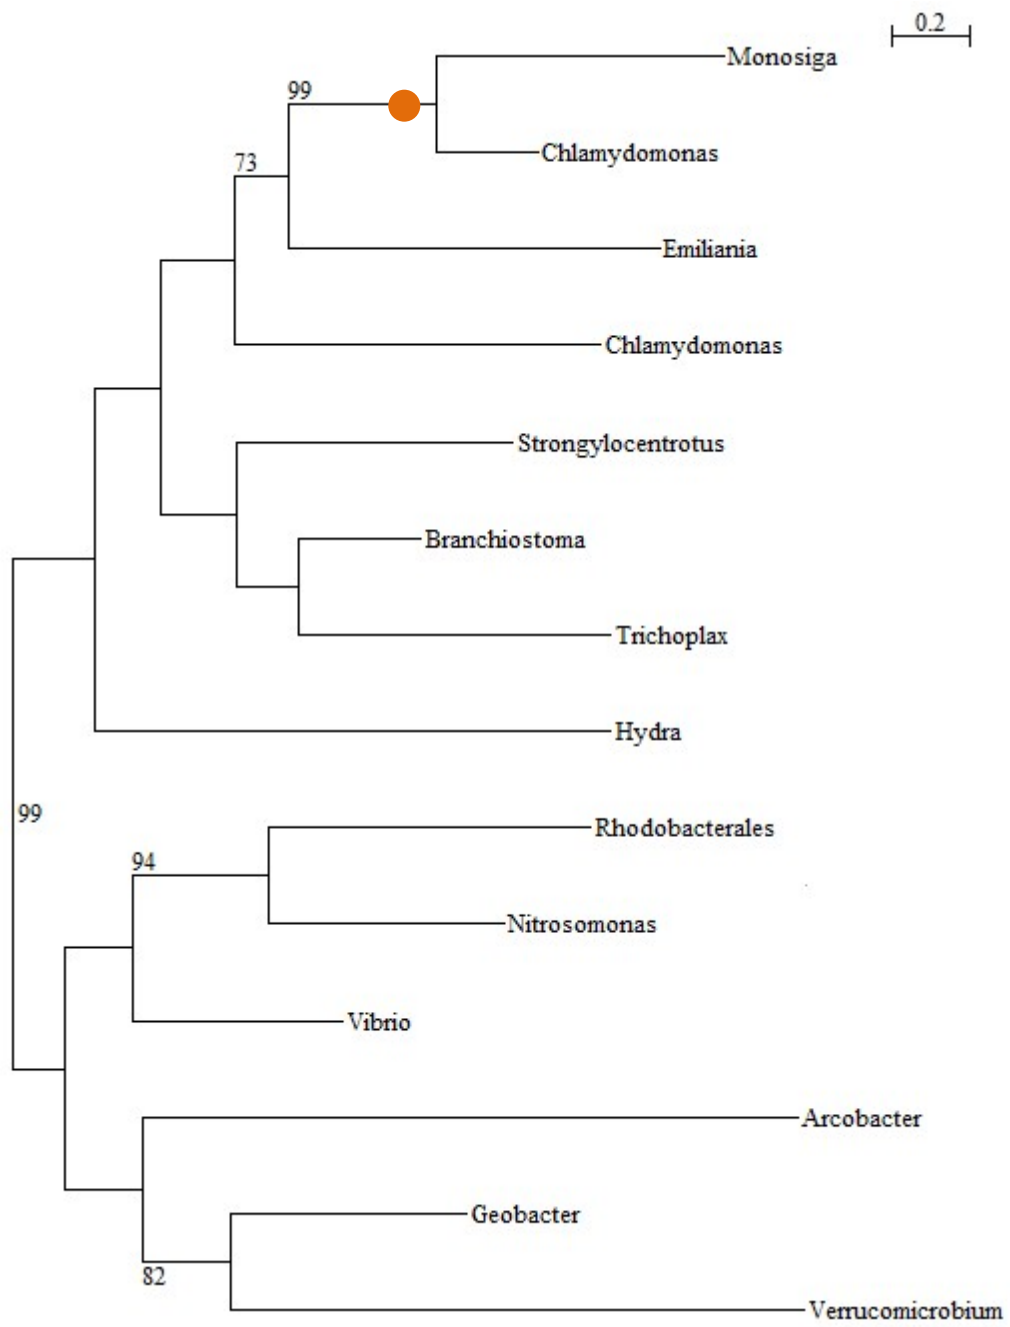

**Figure S43.** Phylogeny of one hypothetical protein (GI No. 167534491).

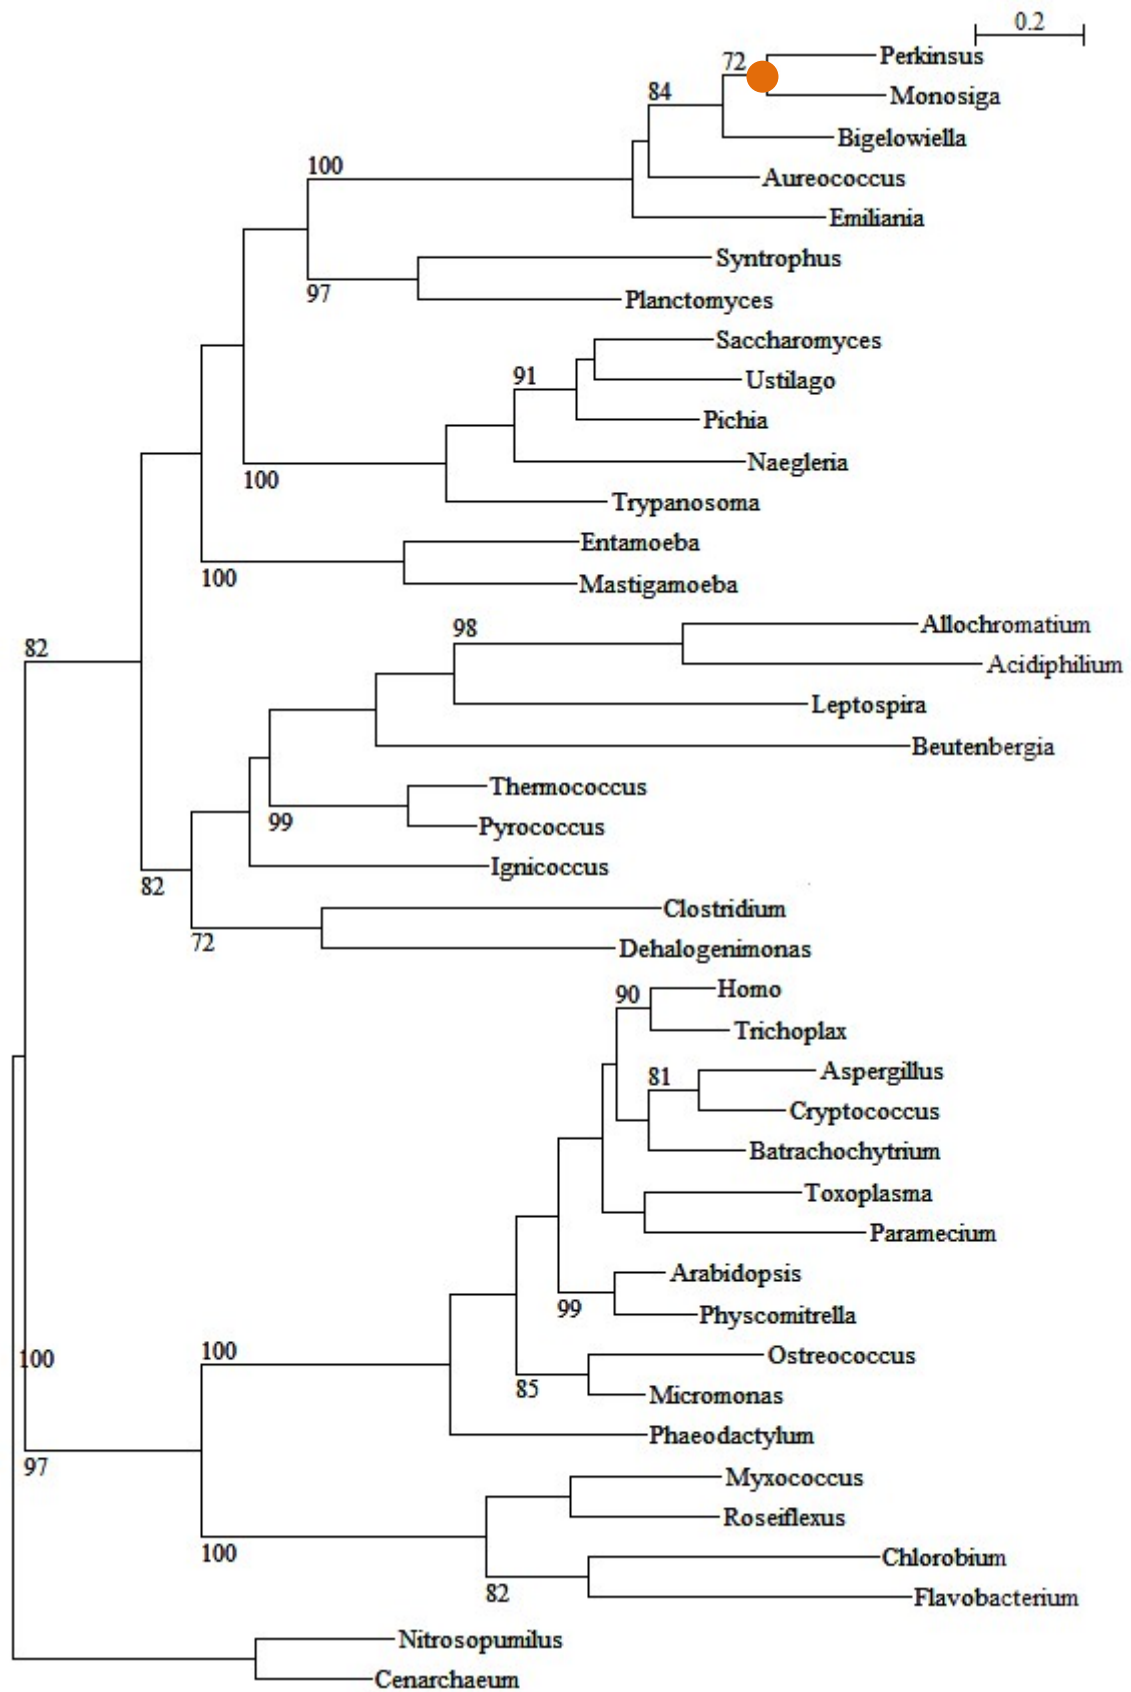

**Figure S44.** Phylogeny of dolichol phosphate mannose synthase (GI No. 167535637).

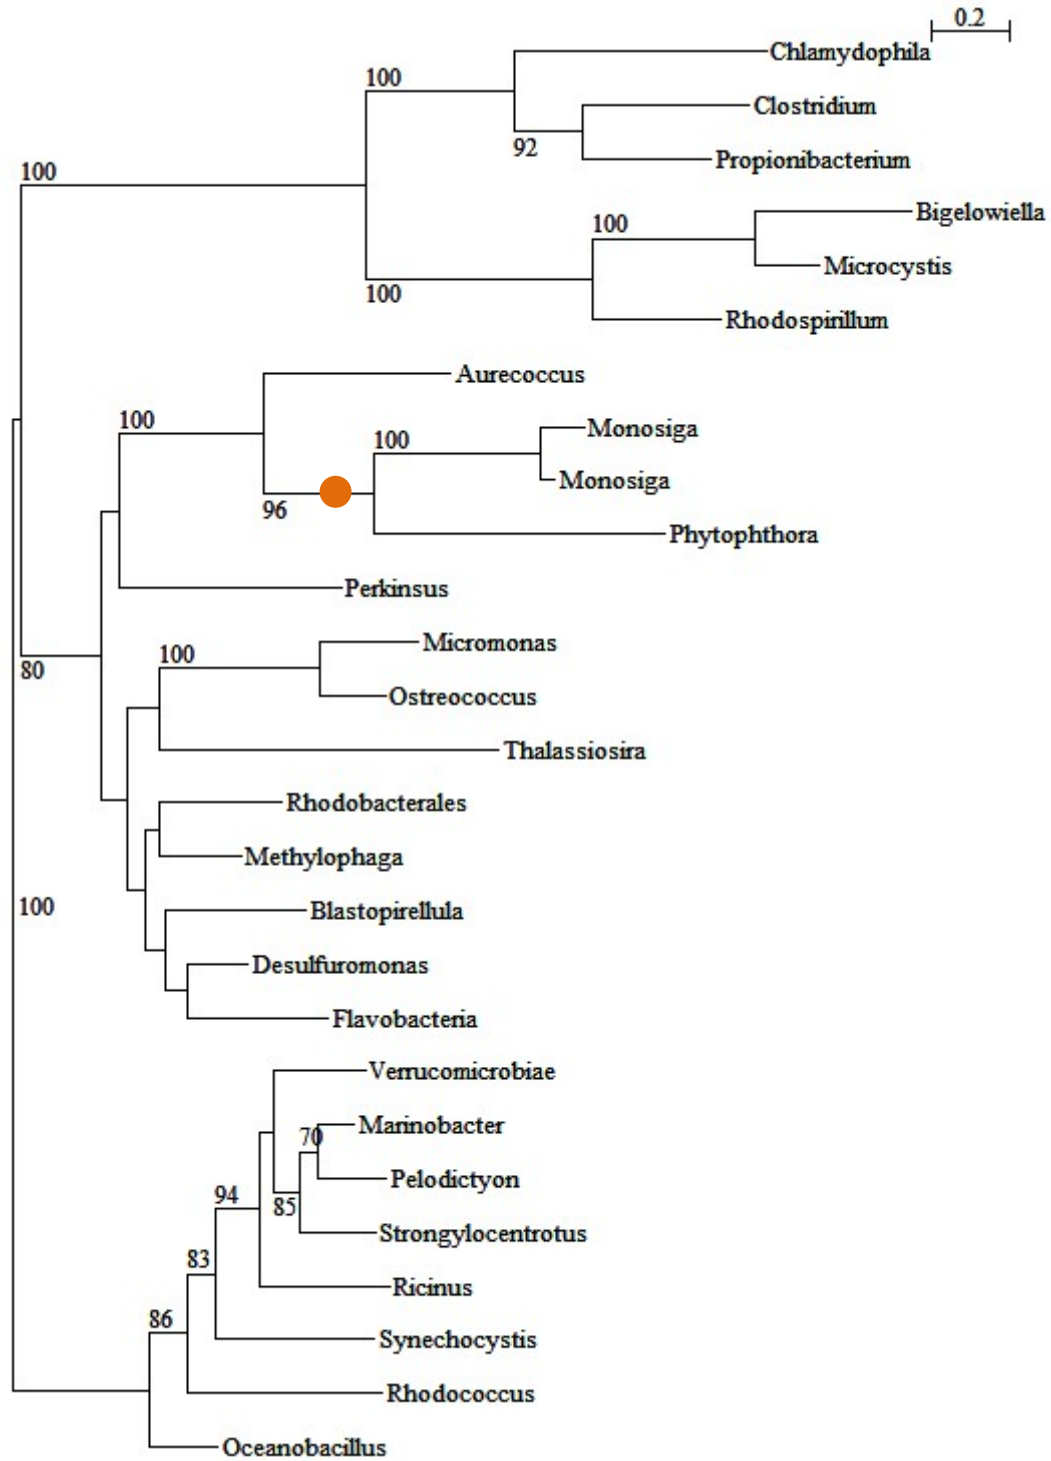

**Figure S45.** Phylogeny of sulphate transporter (Gi No. 167535659 and 167538557).

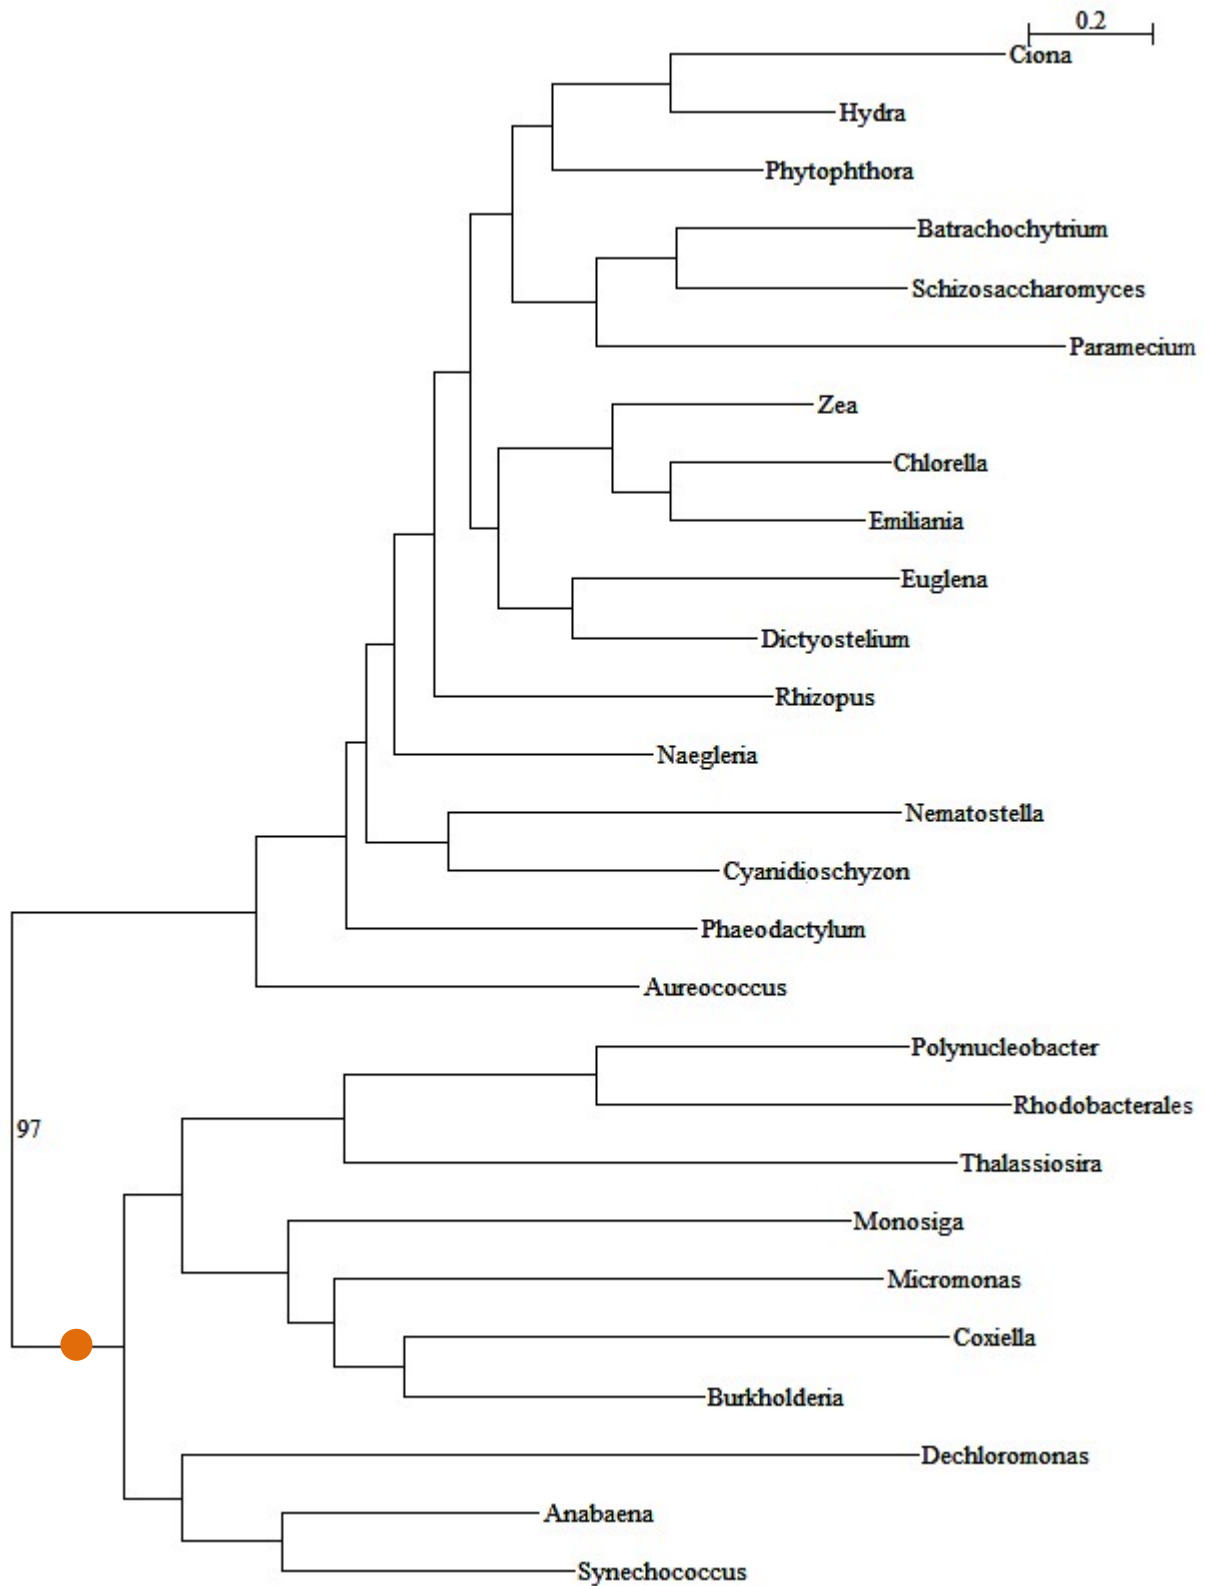

**Figure S46.** Phylogeny of phytochelatin synthase (GI No. 167537519).

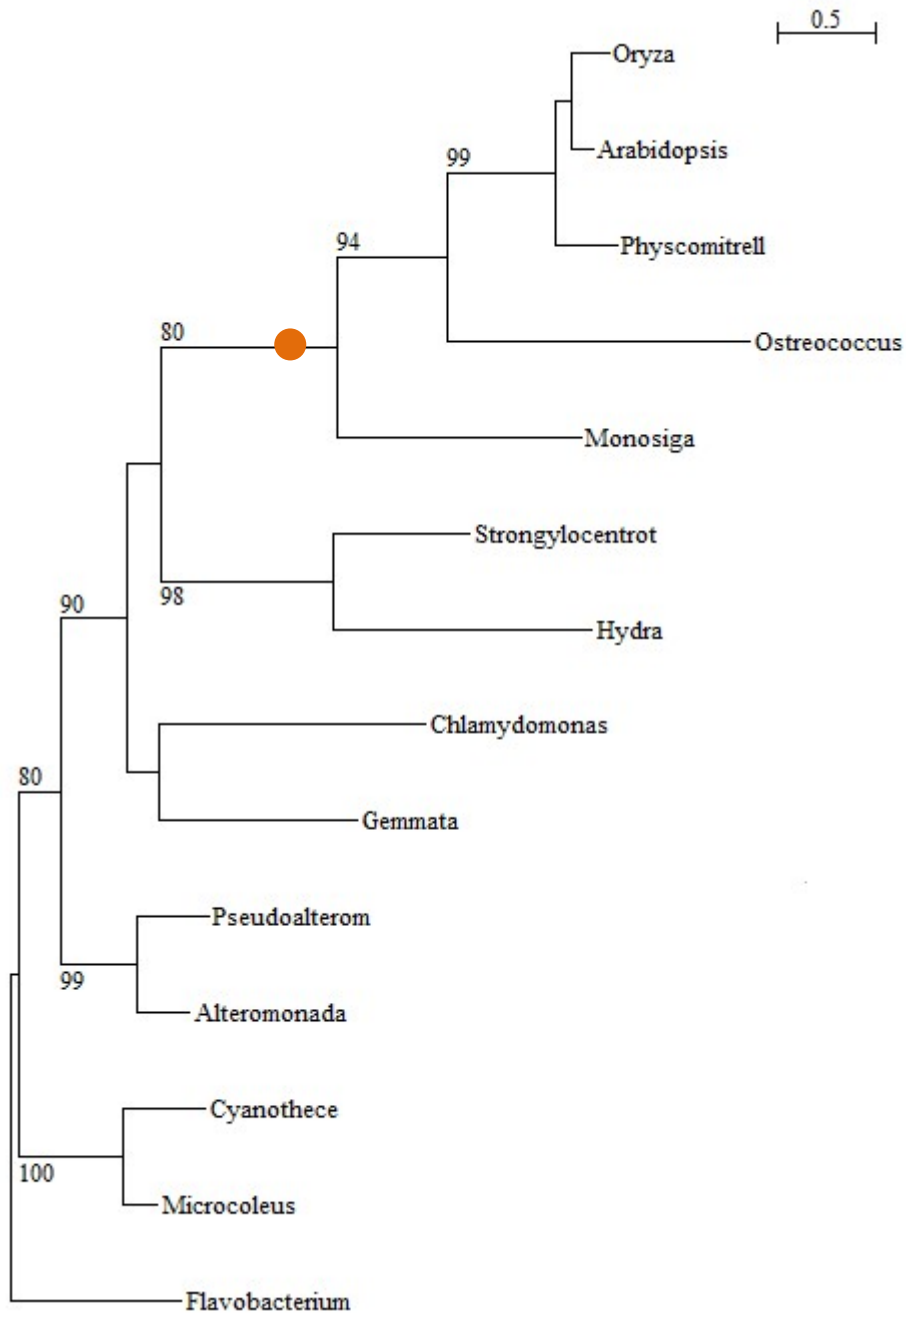

**Figure S47.** Phylogeny of one hypothetical protein (GI No. 167537477).

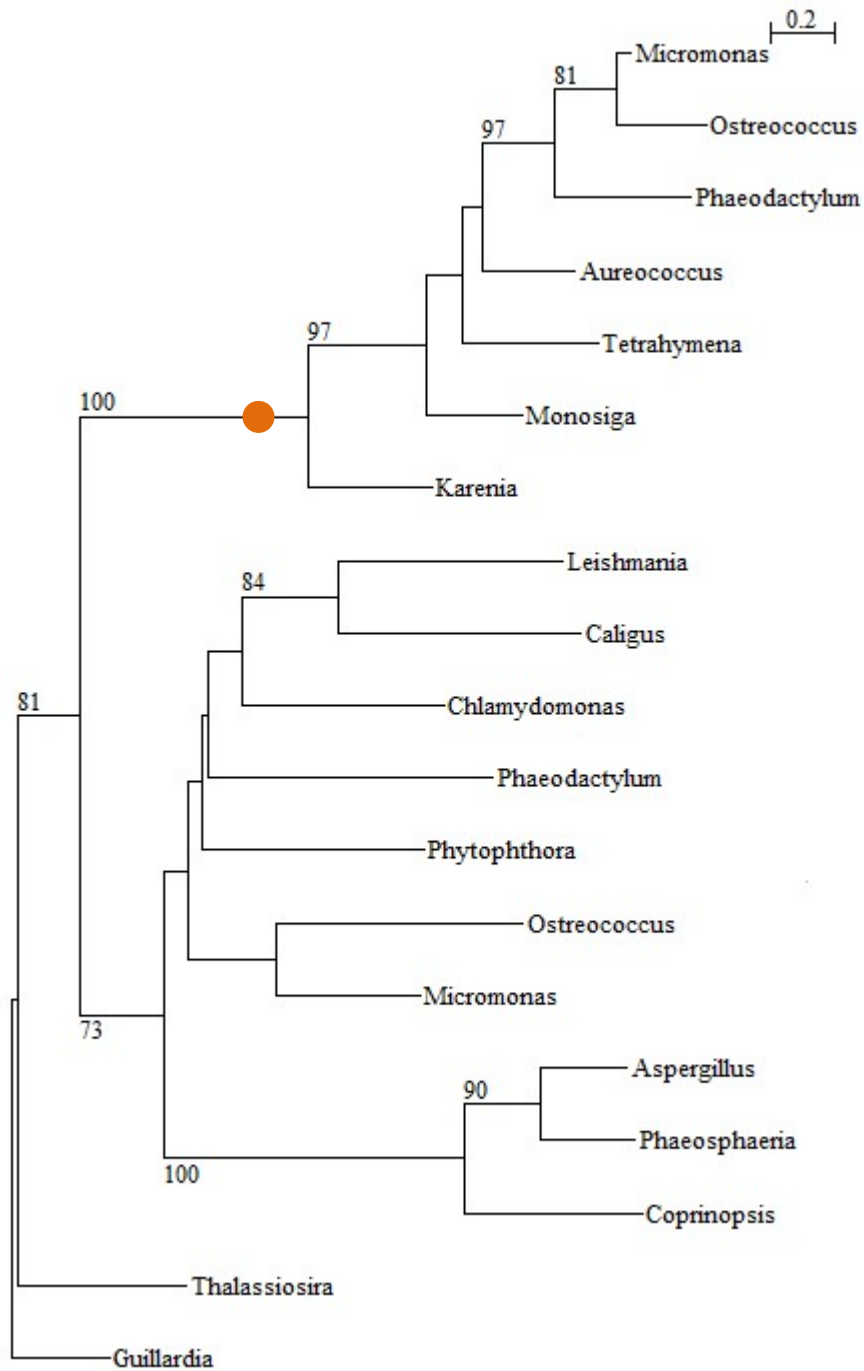

**Figure S48.** Phylogeny of one hypothetical protein (GI No. 167537588).



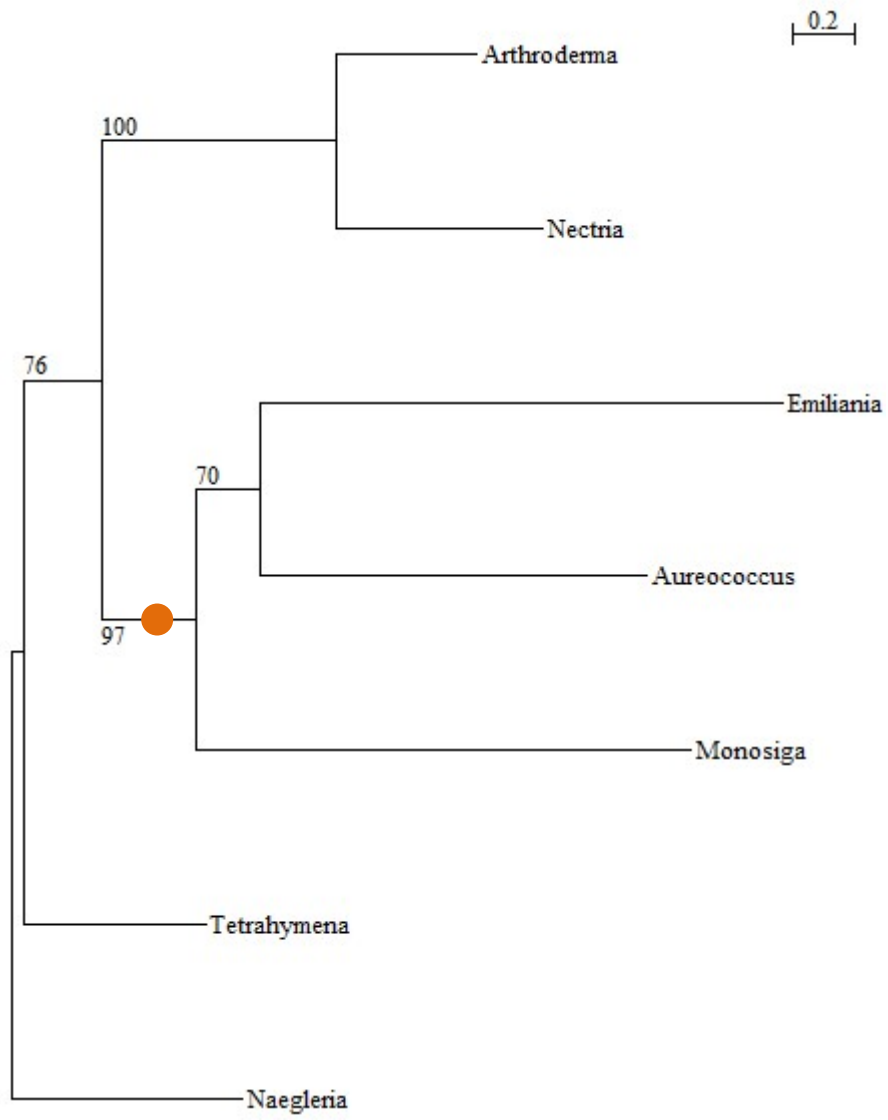

**Figure S49.** Phylogeny of one hypothetical protein (GI No. 167538097).

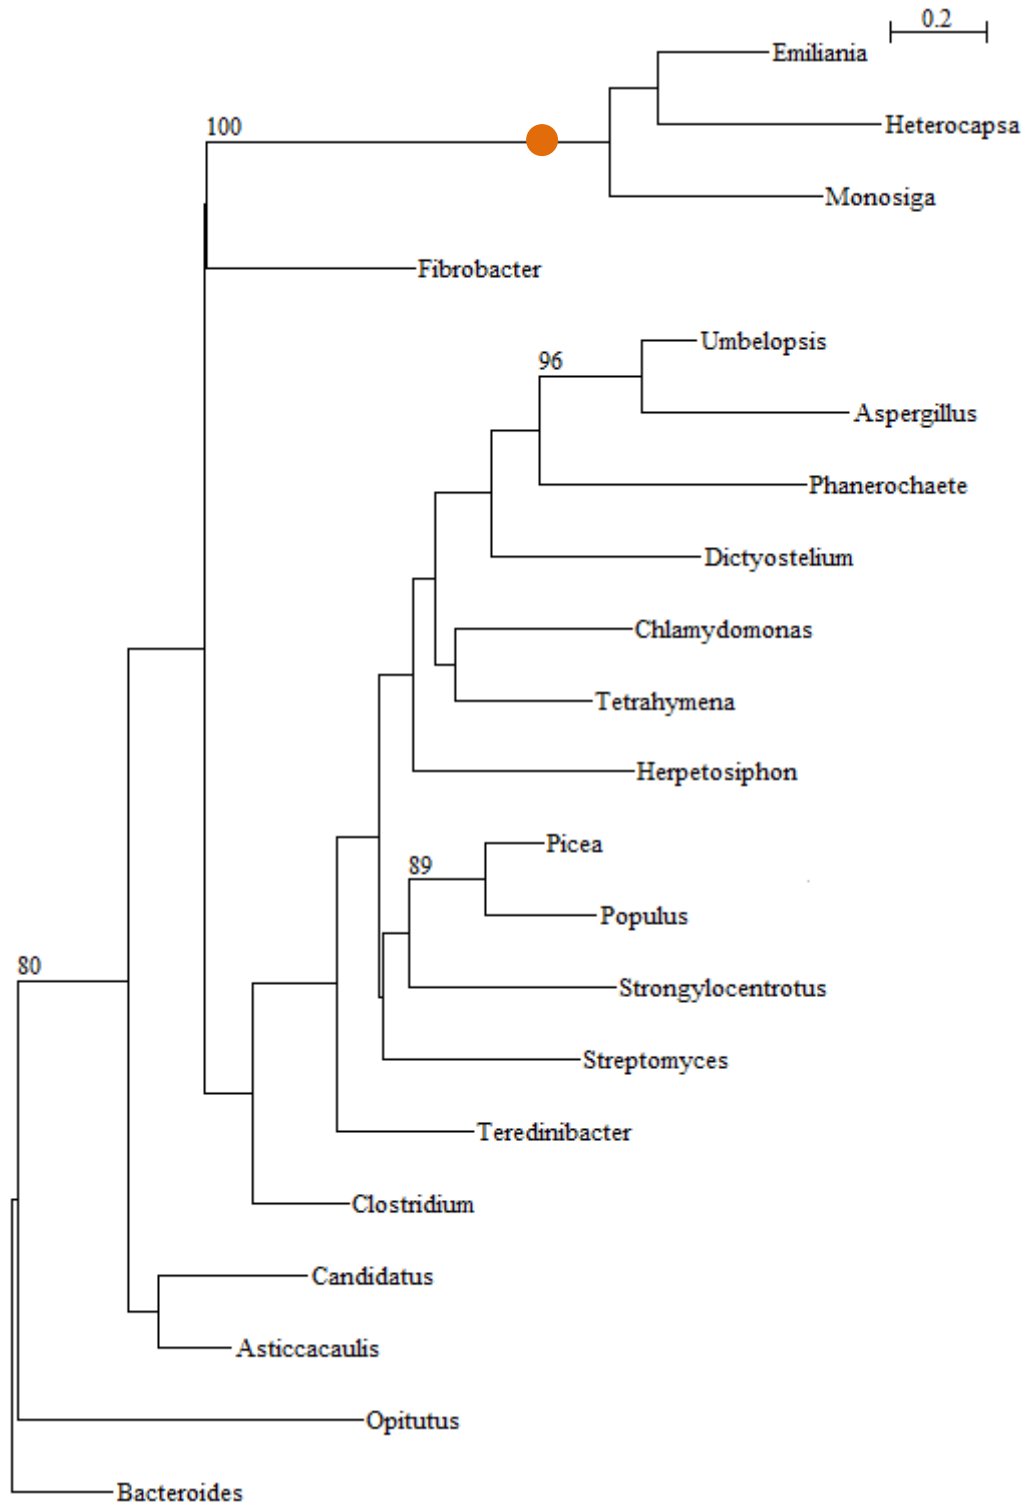

**Figure S50.** Phylogeny of one hypothetical protein (GI No. 167520320).

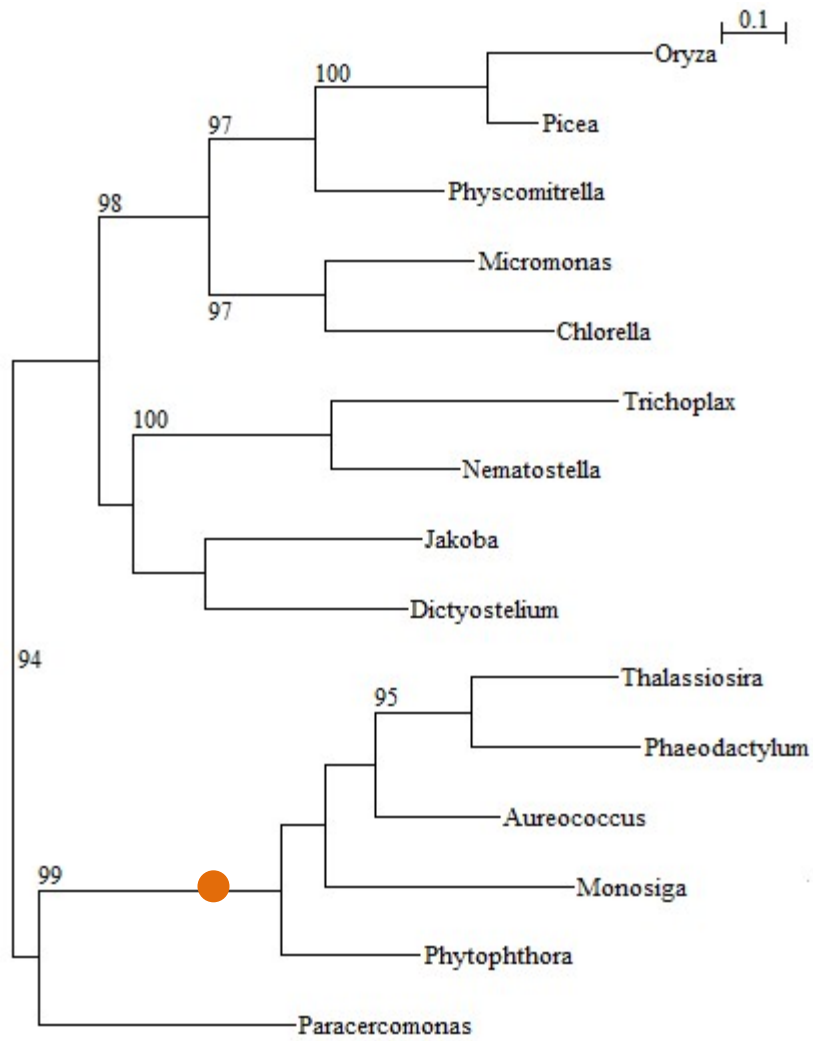

**Figure S51.** Phylogeny of Ca<sup>2+</sup> Cation Antiporter (CaCA) Family (GI No. 167516696).

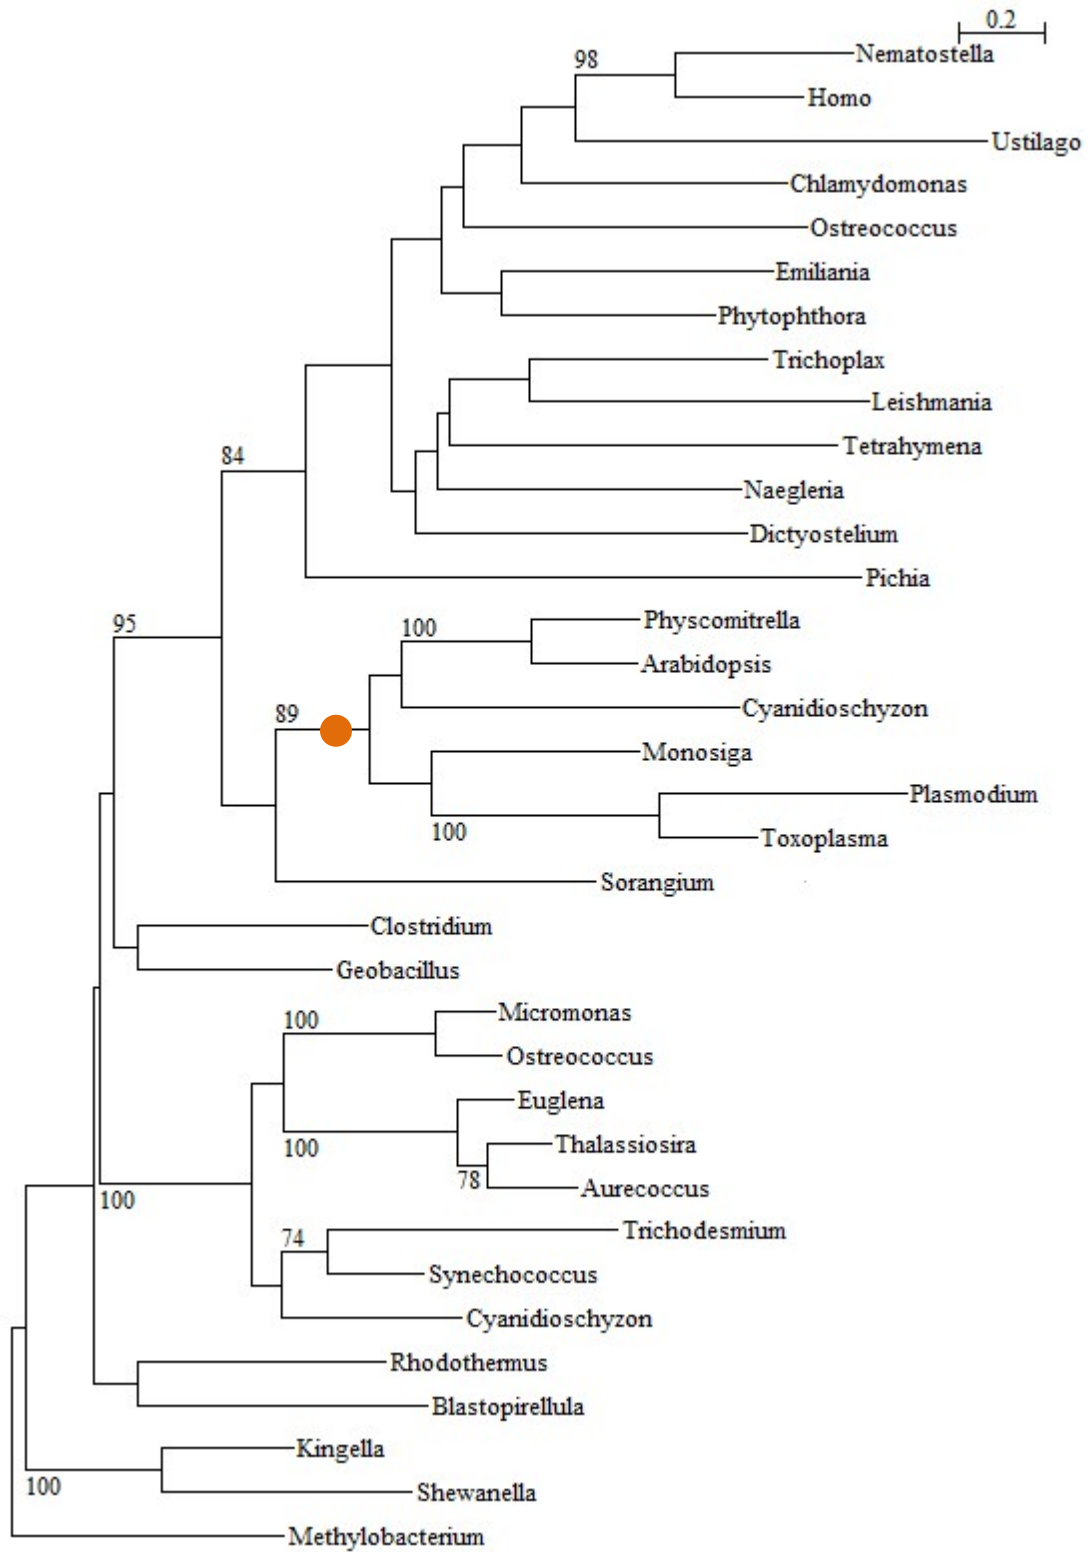

**Figure S52.** Phylogeny of ubiquinone biosynthesis protein coq-8 or ABC1 family protein (GI No. 167519152).

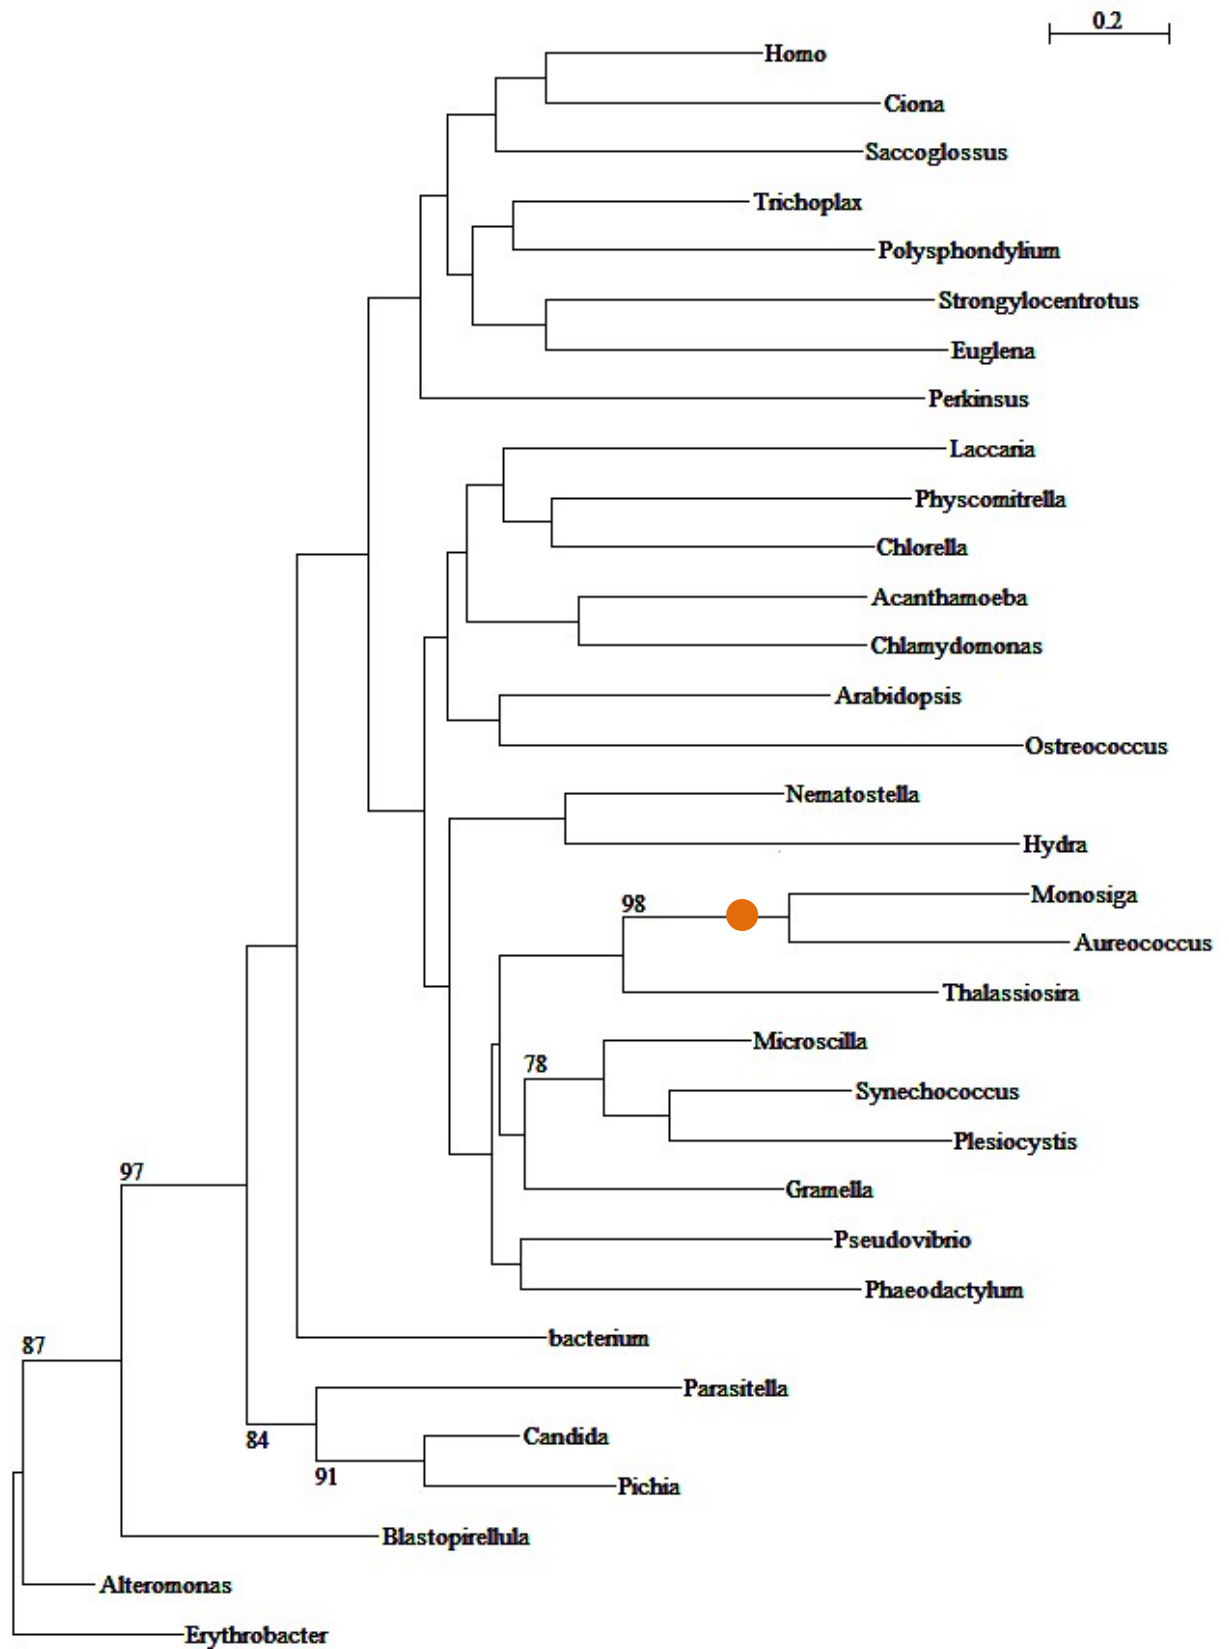

Figure S53. Phylogeny of aldehyde reductase (GI No. 167519881).

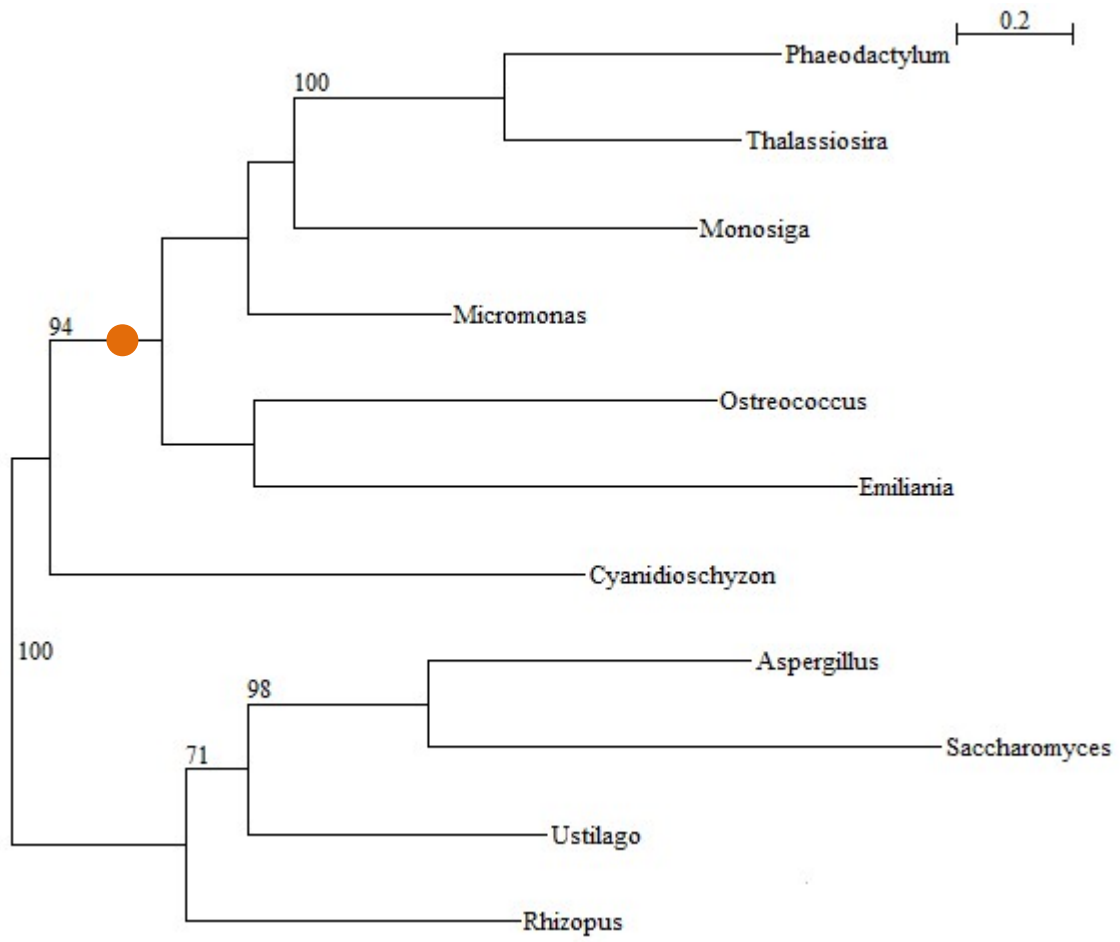

**Figure S54.** Phylogeny of oxidoreductase (GI No. 167520798).

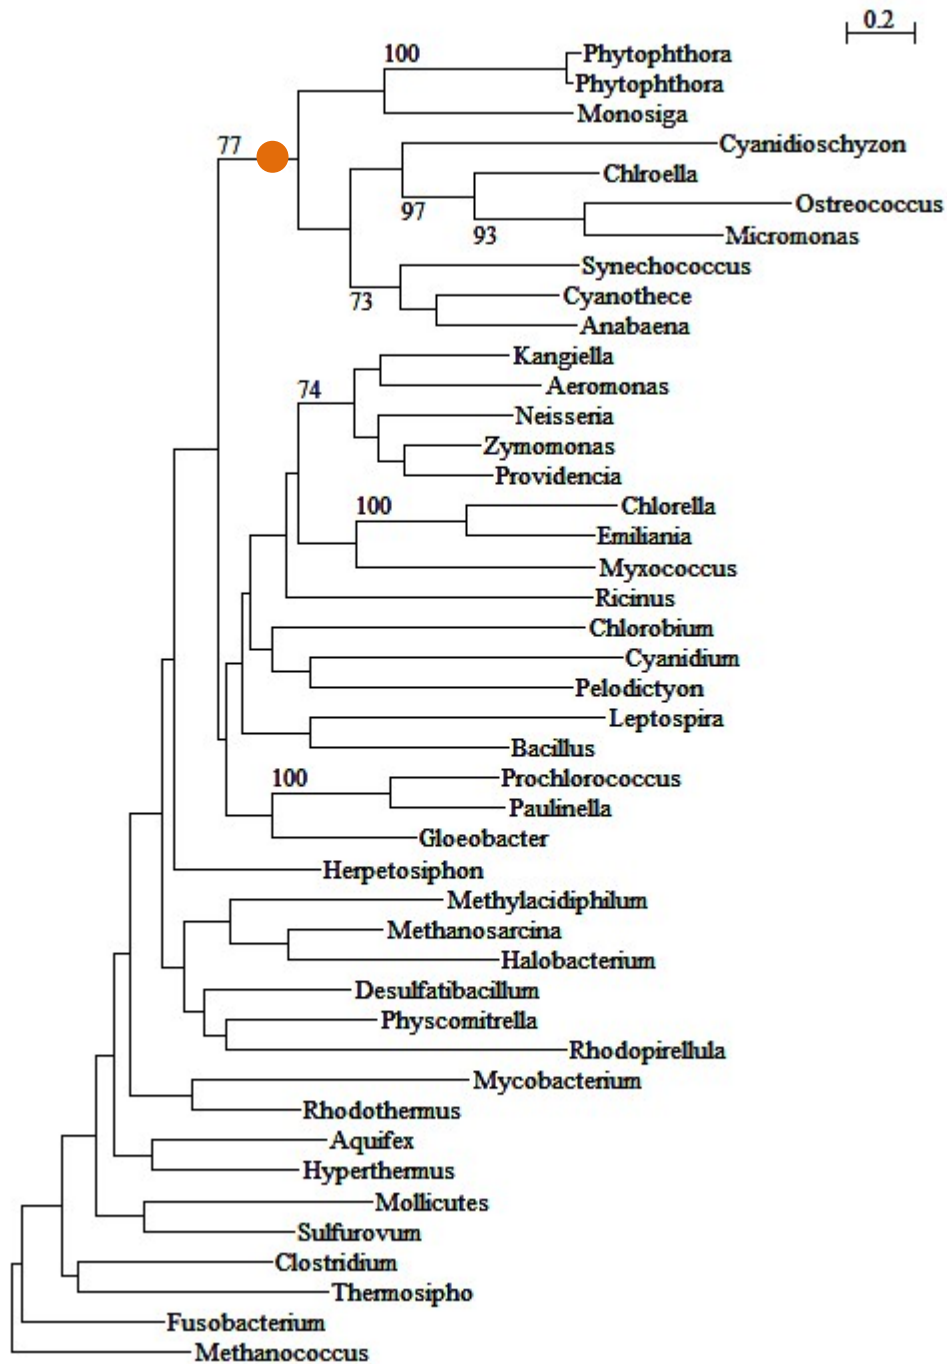

**Figure S55.** Phylogeny of uroporphyrinogen III synthase/methyltransferase (GI No. 167515658).

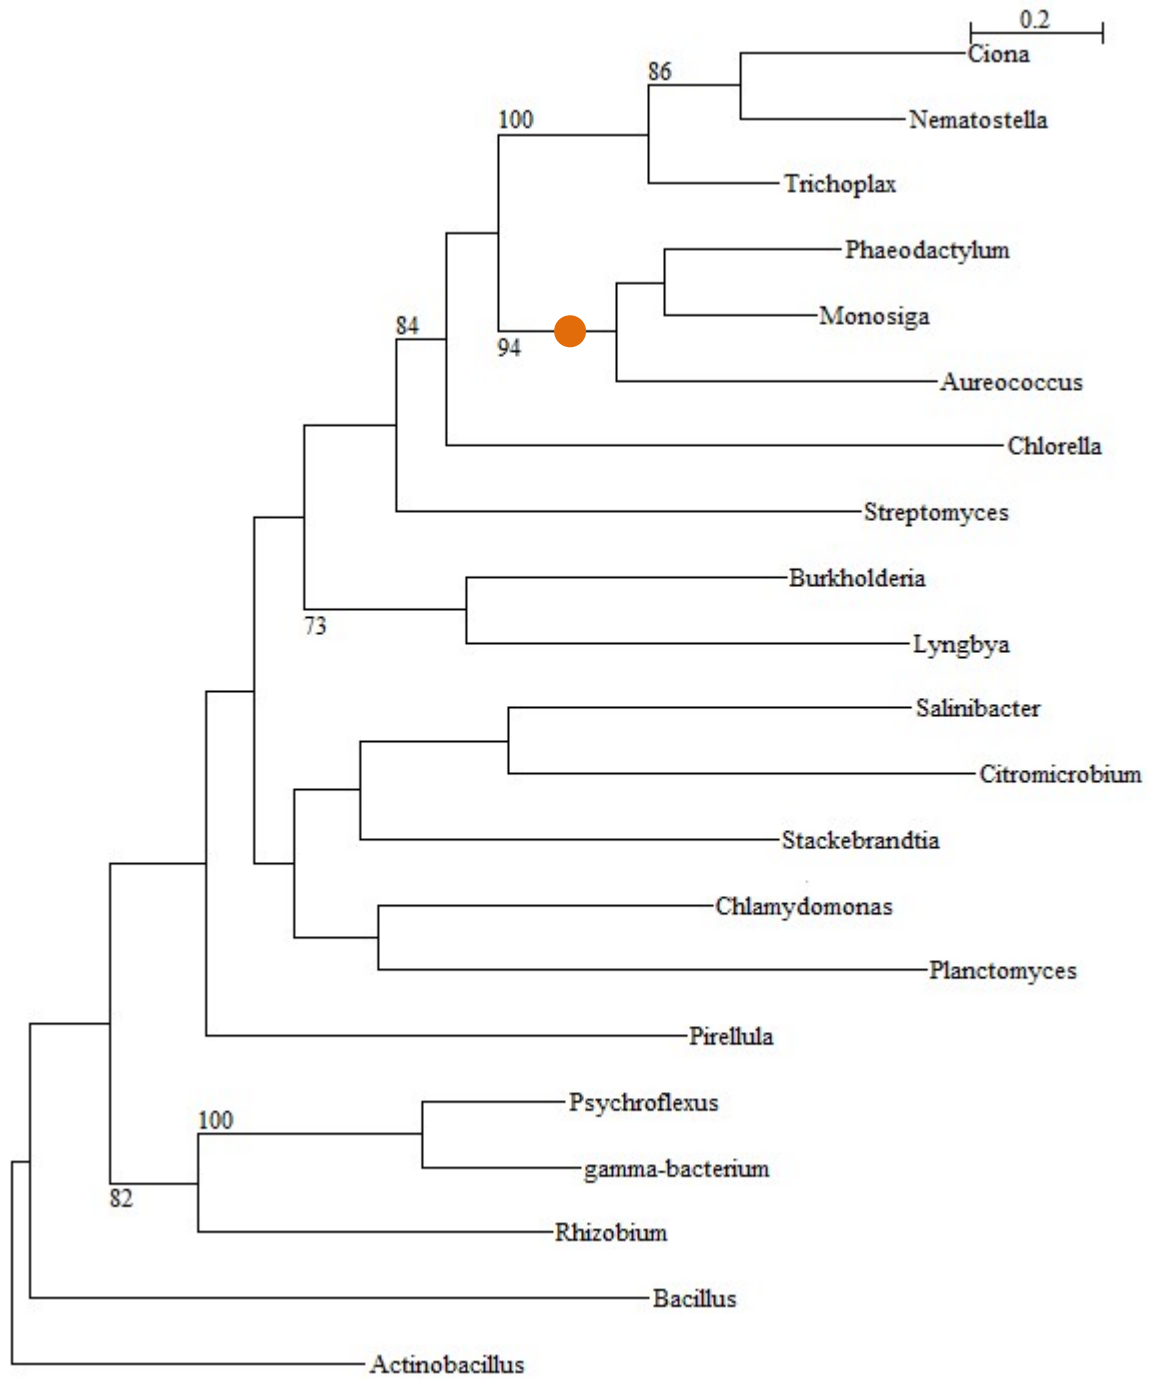

**Figure S56.** Phylogeny of short-chain dehydrogenase (GI No. 167516176).



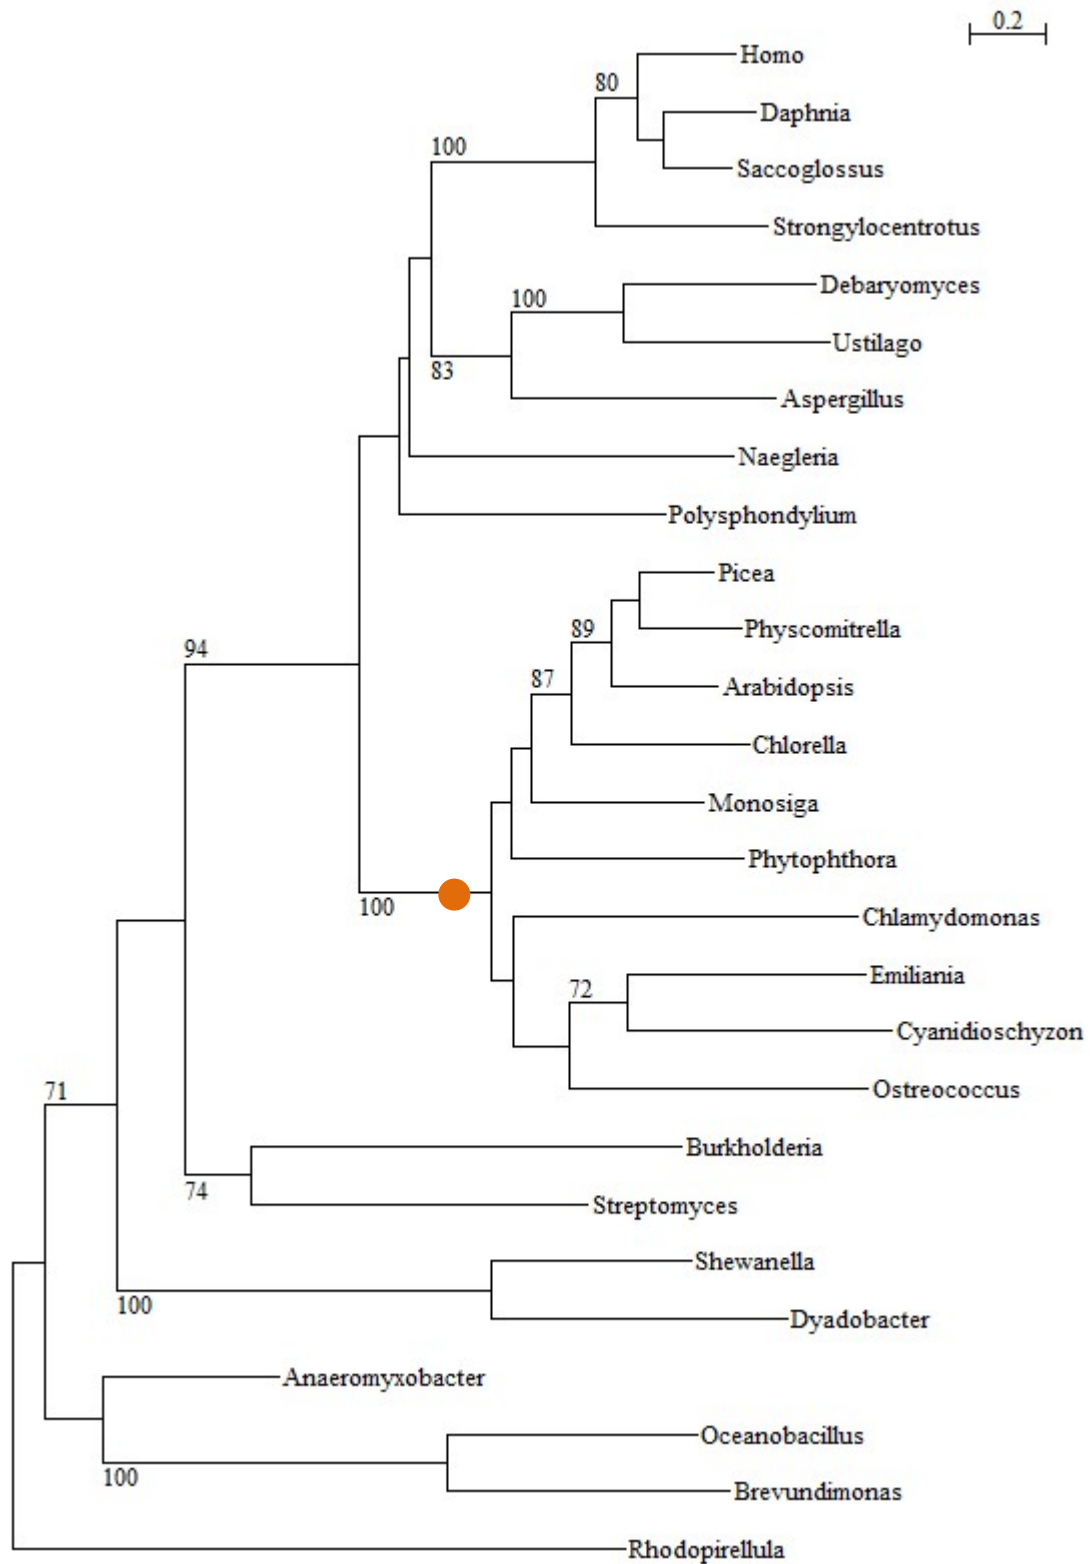

**Figure S57.** Phylogeny of acid phosphatase (GI No. 167518307).

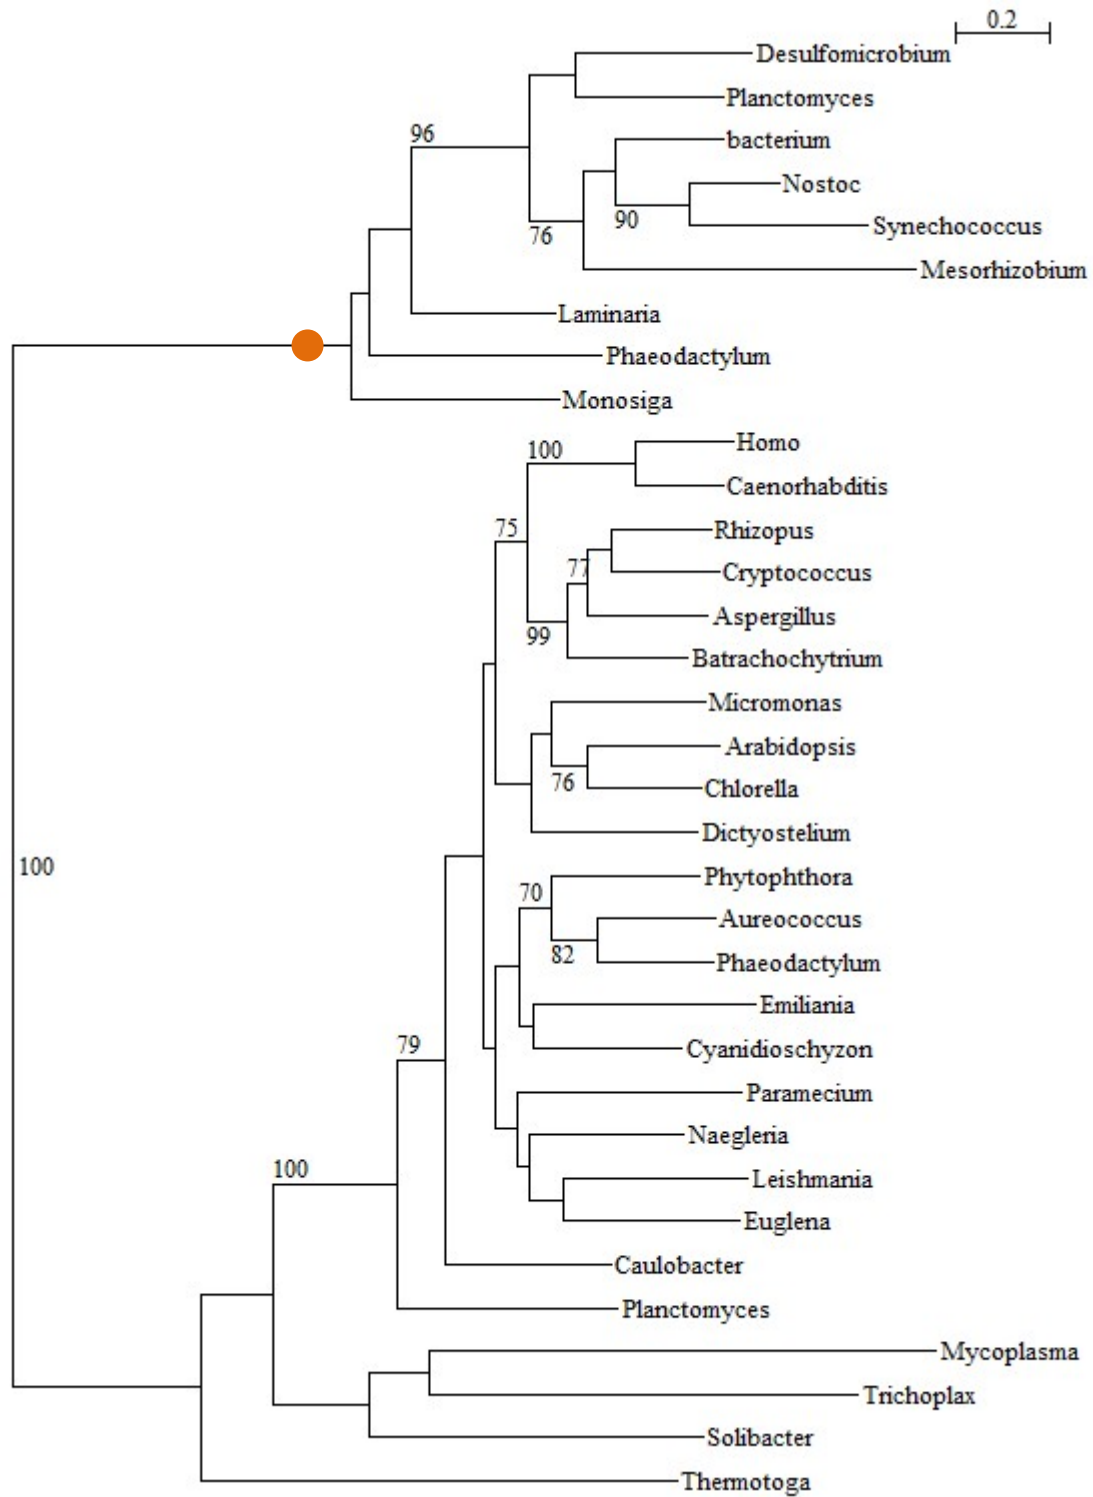

**Figure S58.** Phylogeny of mercuric reductase (GI No. 167519689).

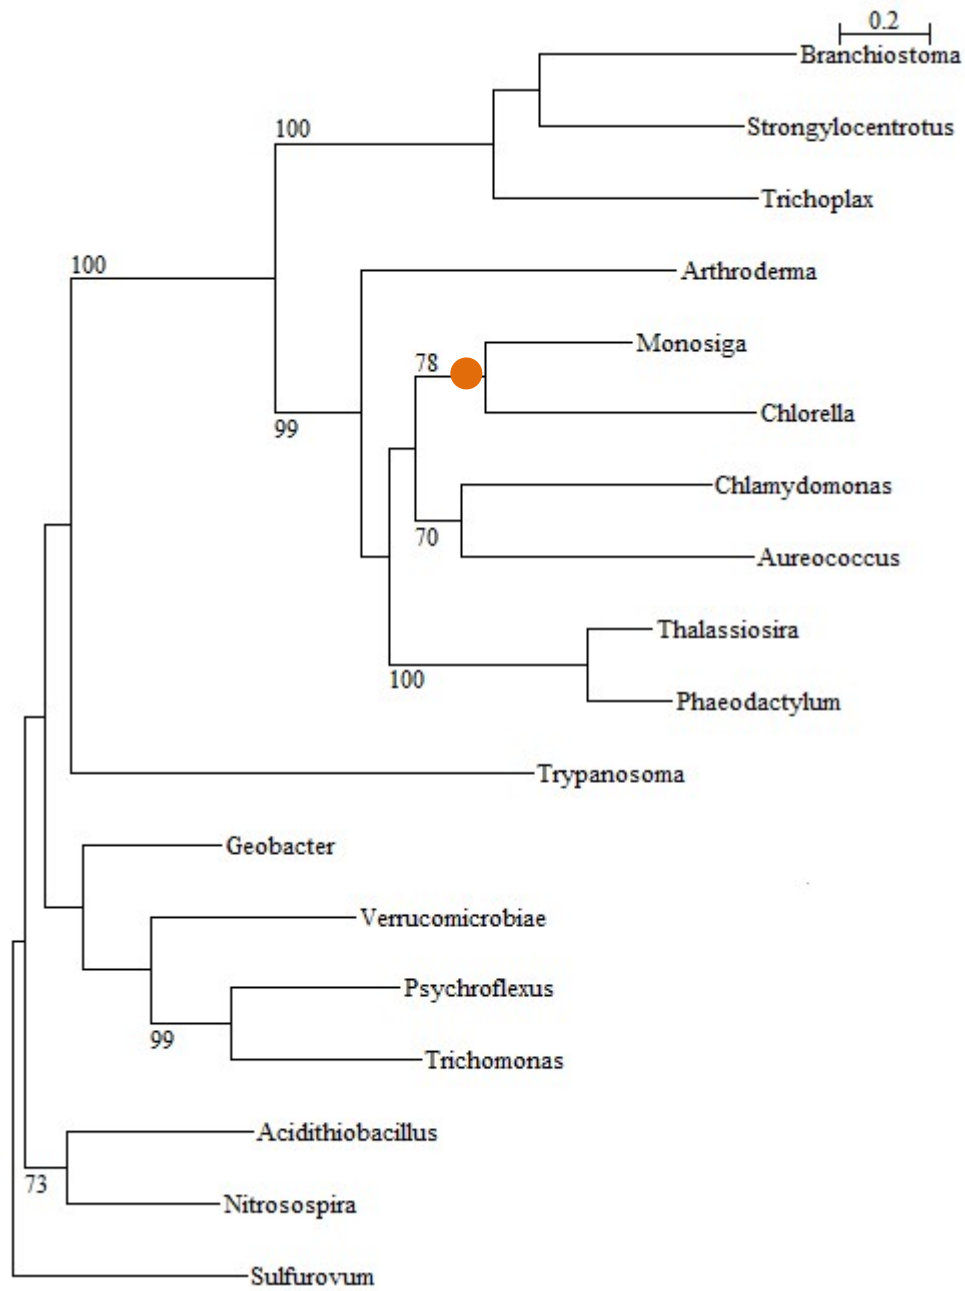

**Figure S59.** Phylogeny of methyltransferase (GI No. 167518566).

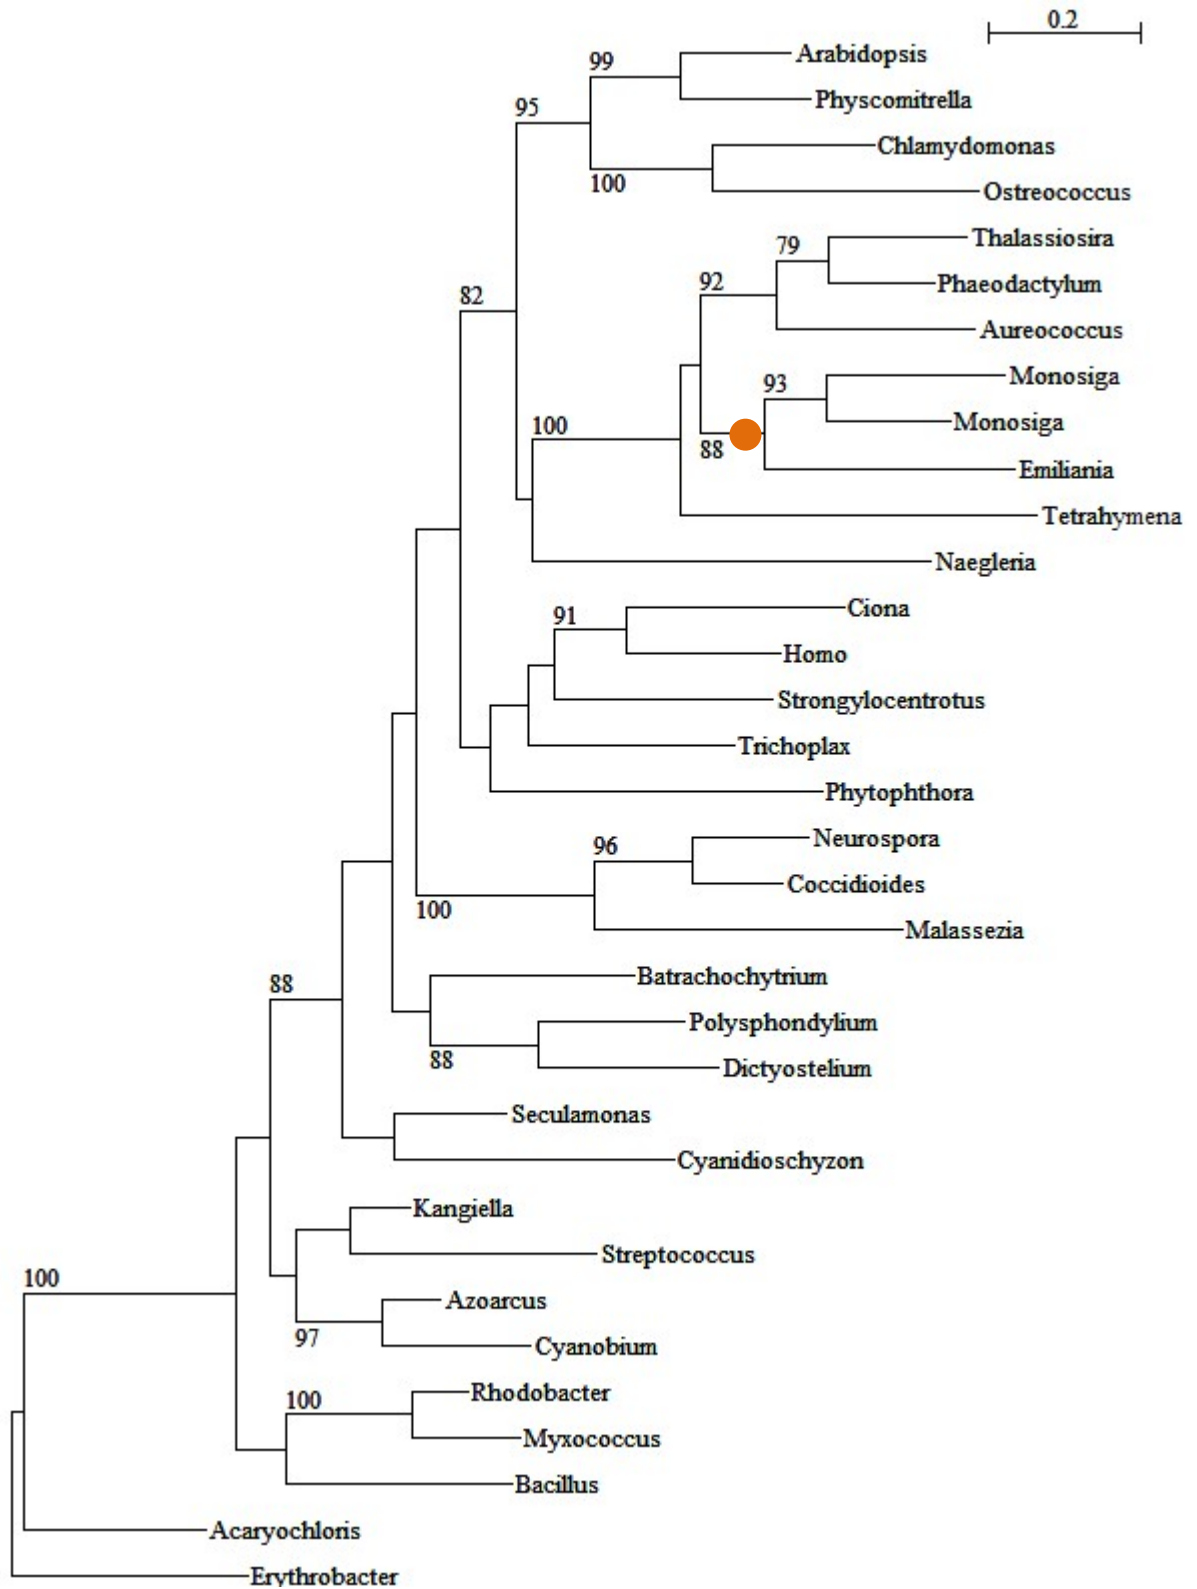

**Figure S60.** Phylogeny of alcohol dehydrogenase class III (Gi No. 167521587 and 167522892).

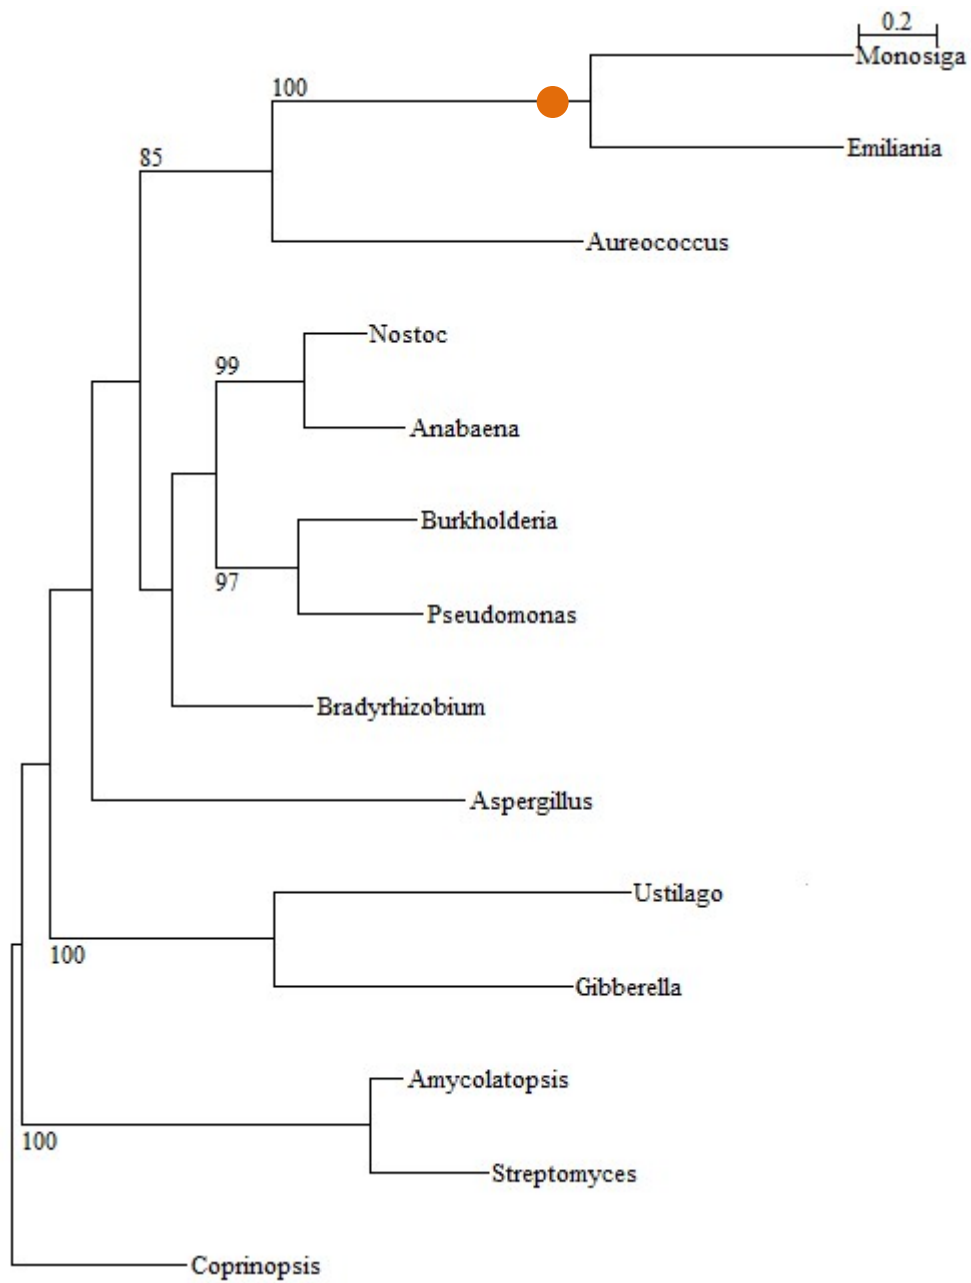

**Figure S1.** Phylogeny of one hypothetical protein (GI No. 167515494).

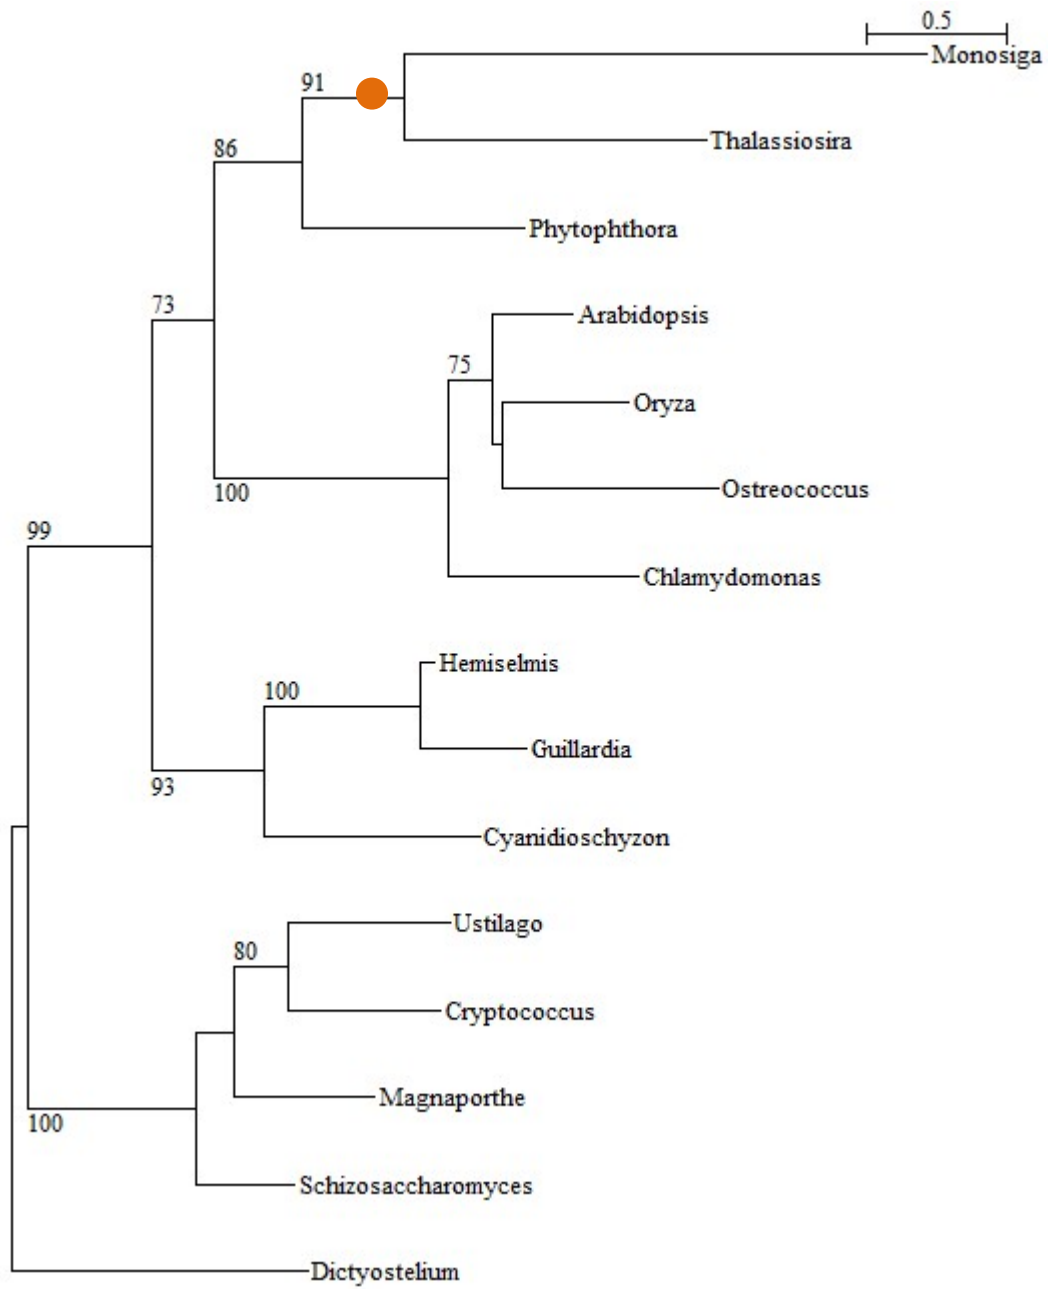

**Figure S62.** Phylogeny of CorA metal ion transporter (GI No. 167516550).

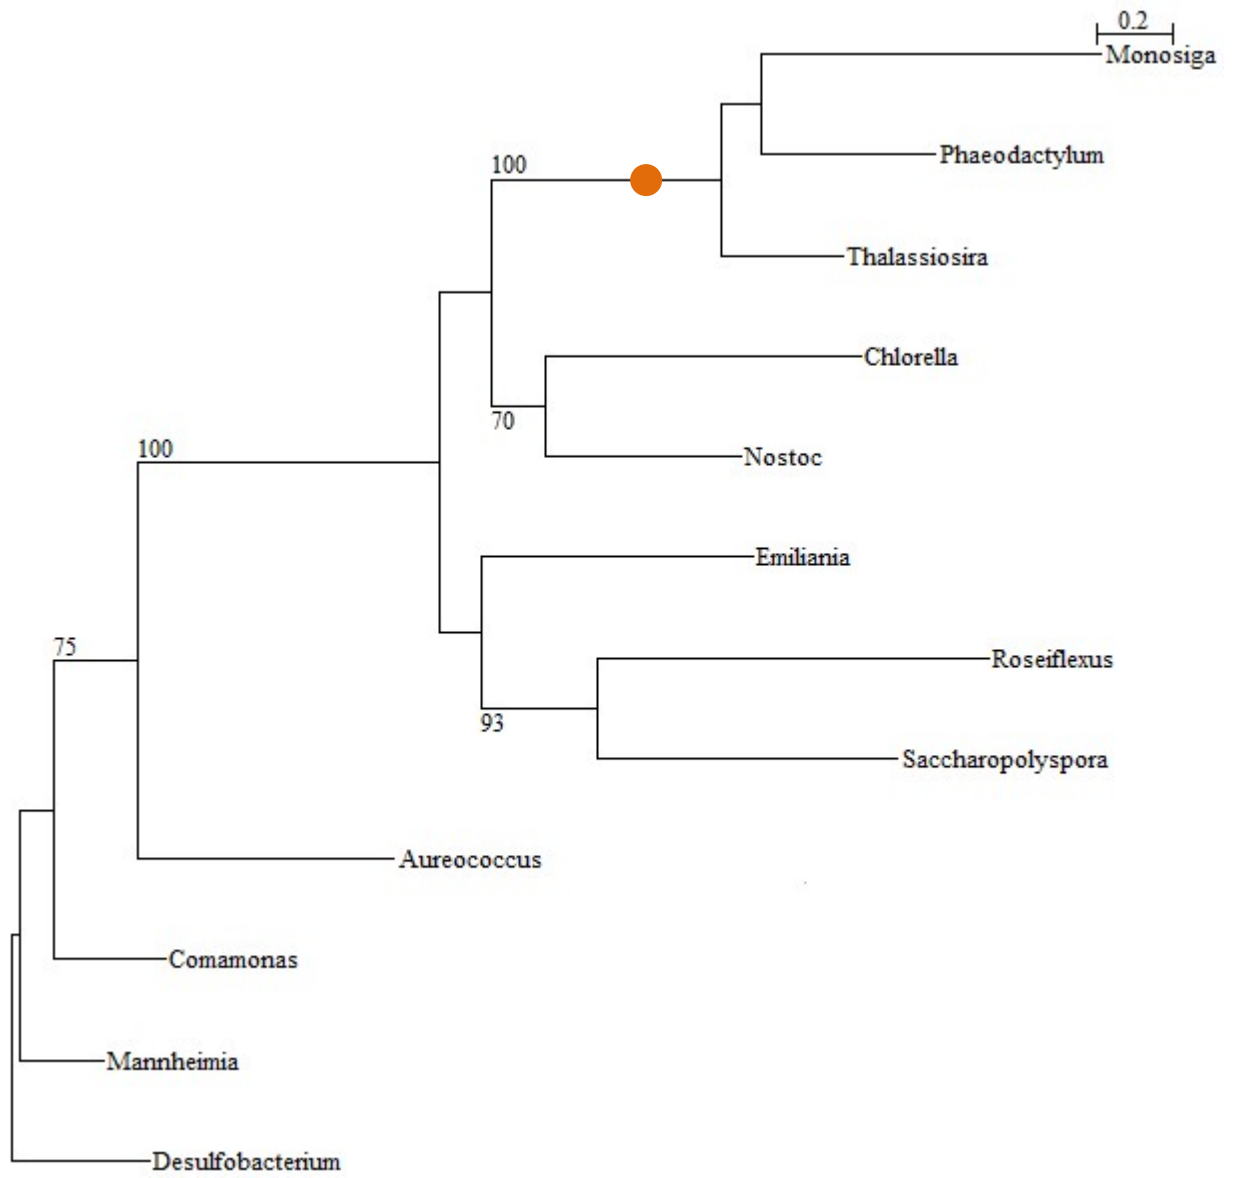

**Figure S63.** Phylogeny of one hypothetical protein (GI No. 167516062).

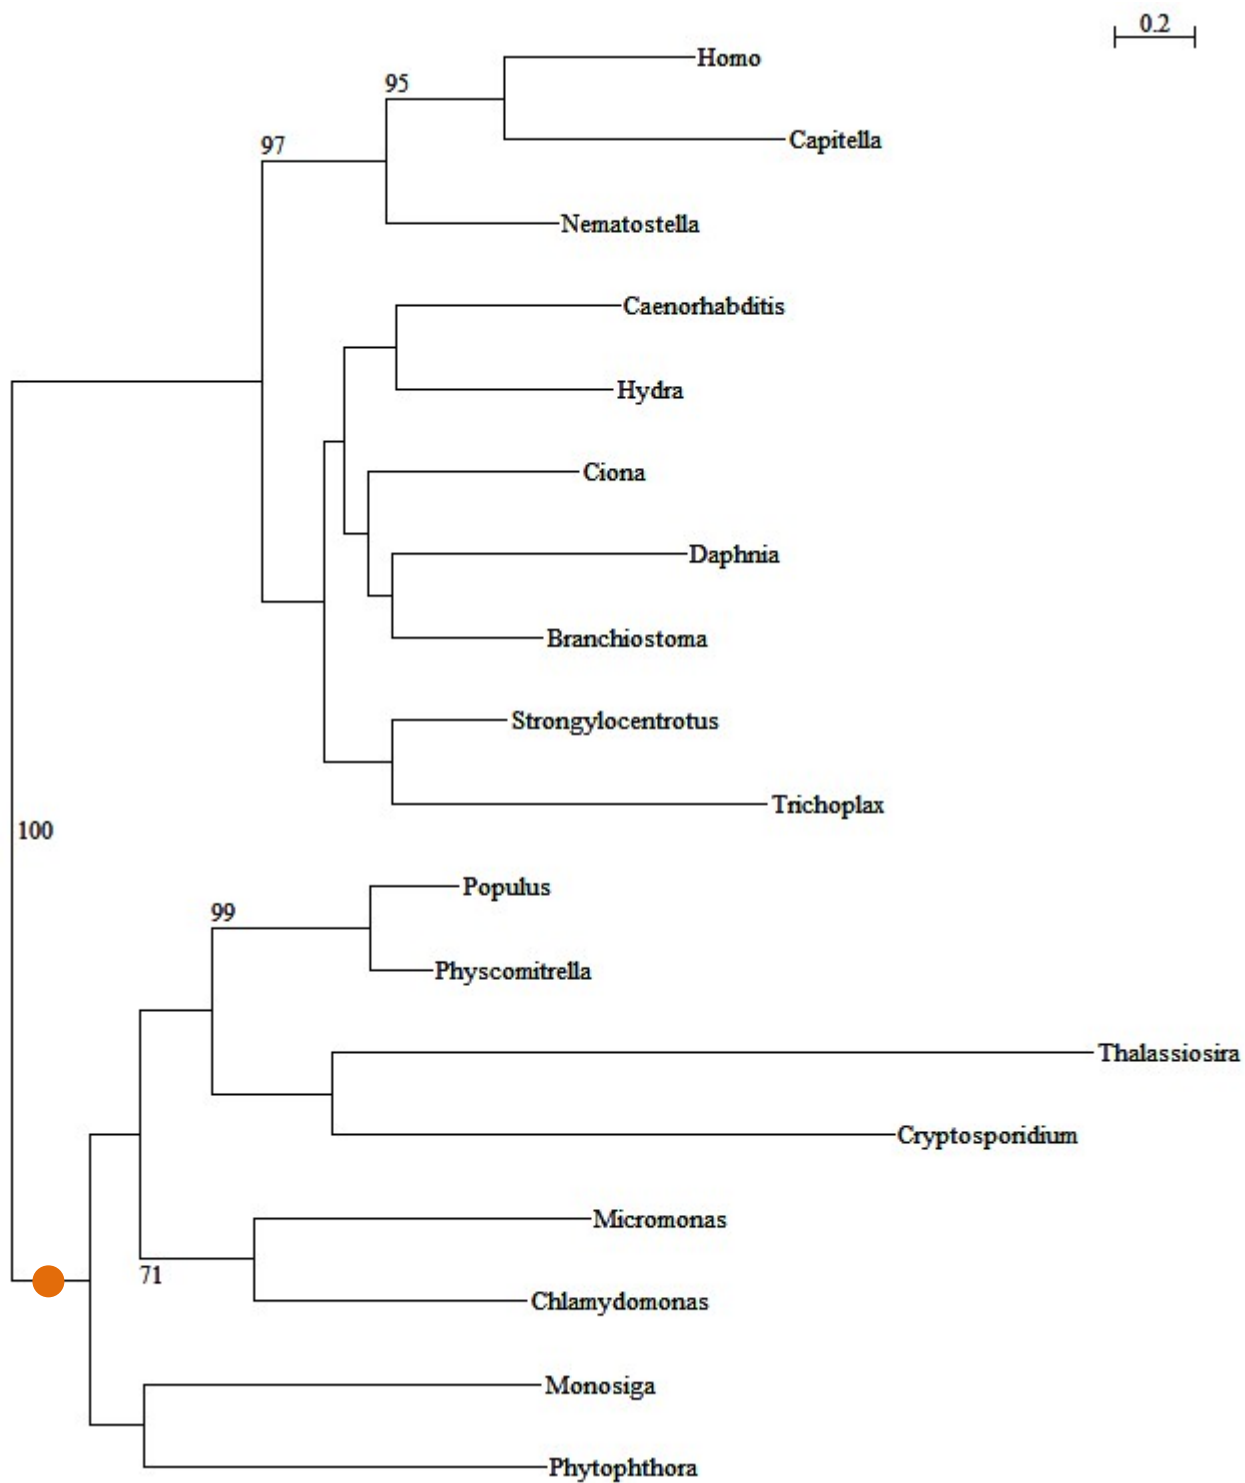

**Figure S64.** Phylogeny of one hypothetical protein (GI No. 167519256).



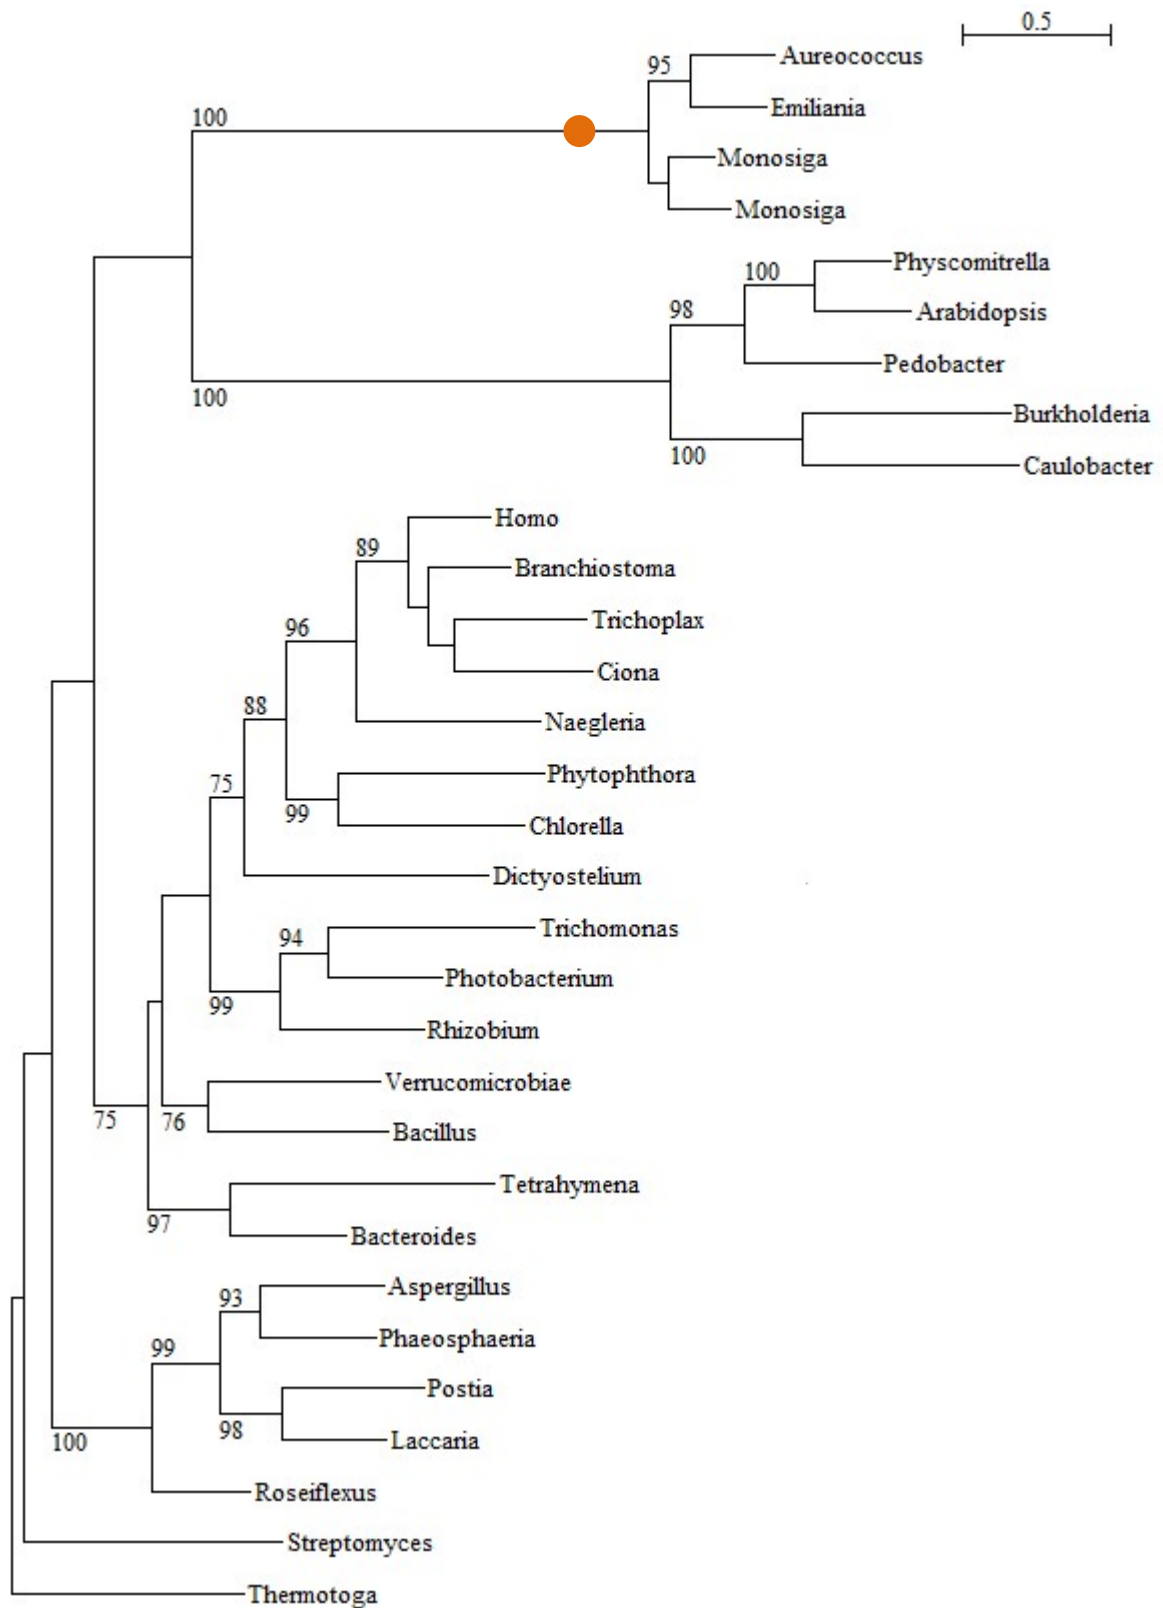

**Figure S65.** Phylogeny of beta-mannosidase (Gi No. 167523877 and 167522846).

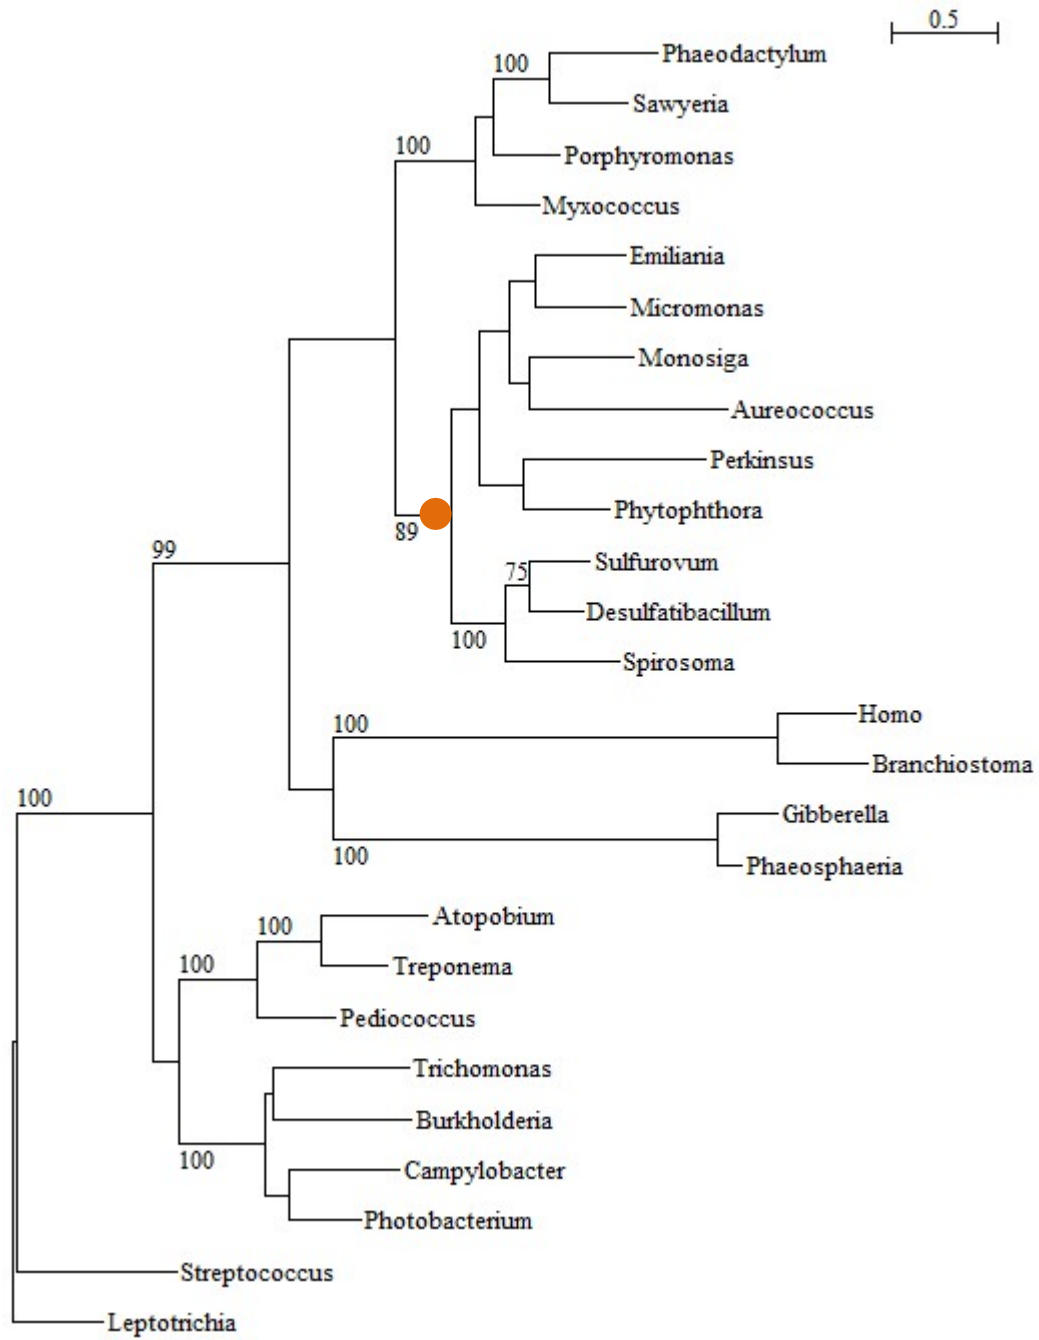

**Figure S66.** Phylogeny of peptidase U34 dipeptidase (GI No. 167524214).

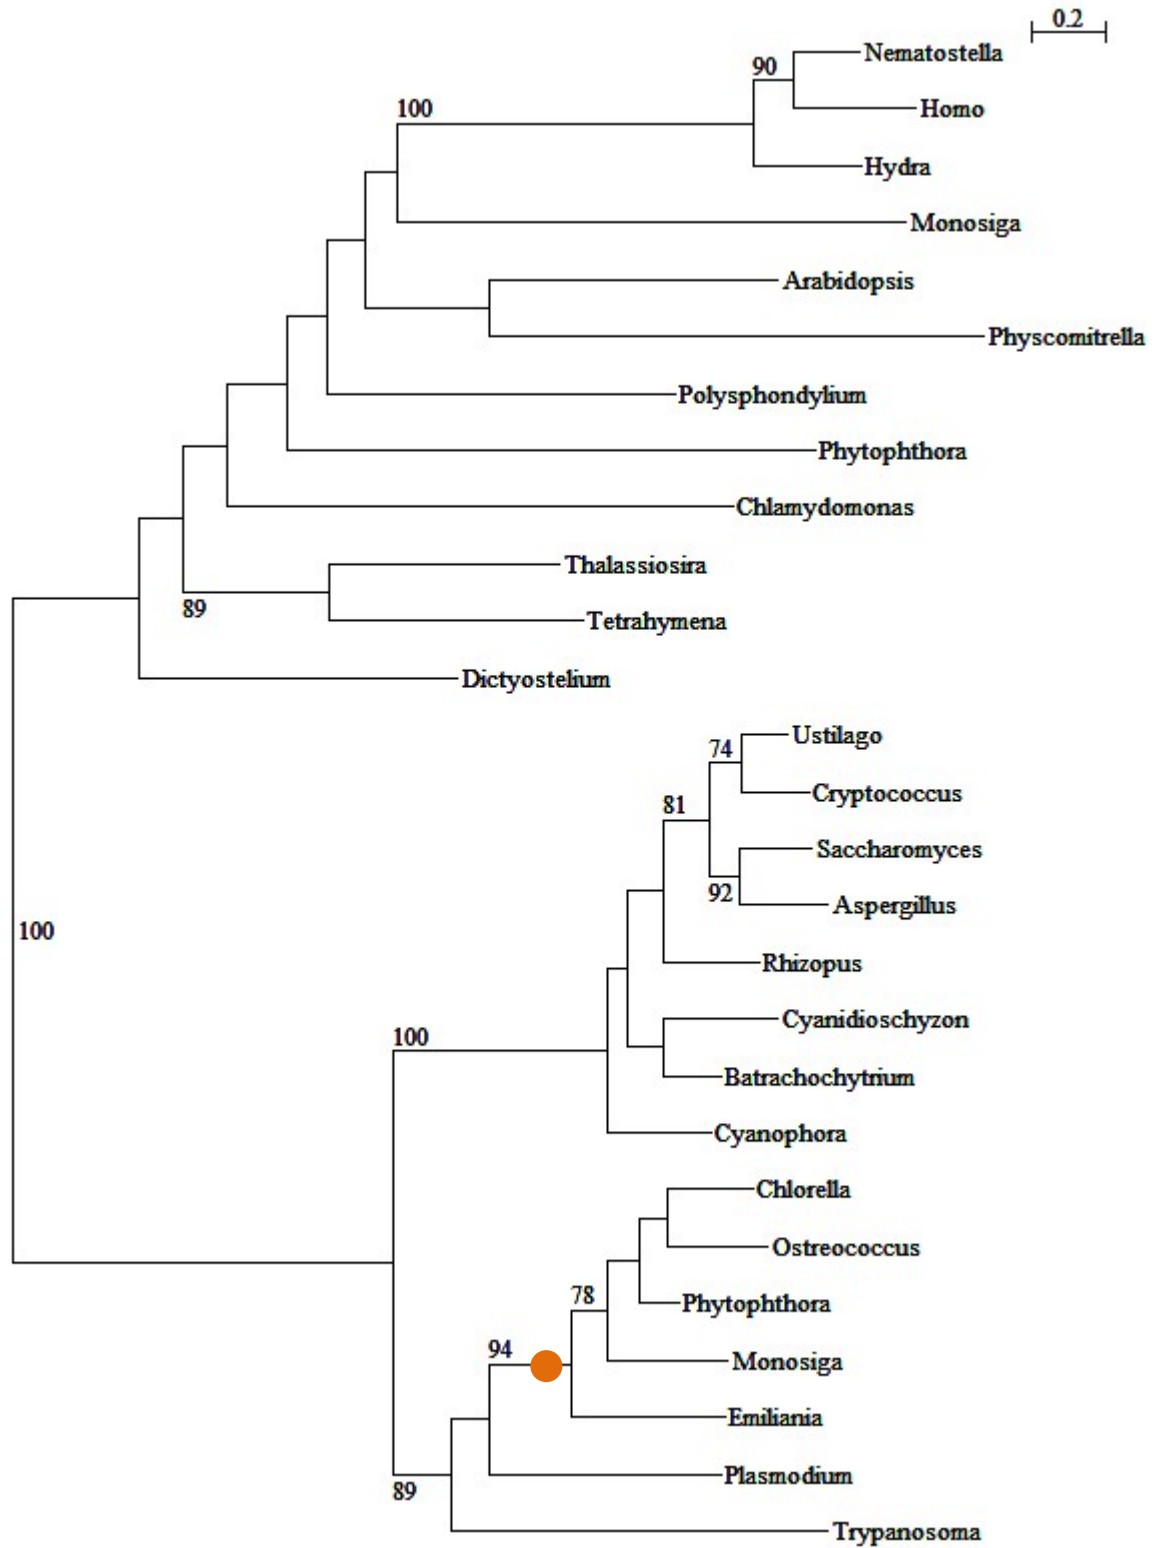

**Figure S67.** Phylogeny of mitochondrial carrier protein (GI No. 167524336).

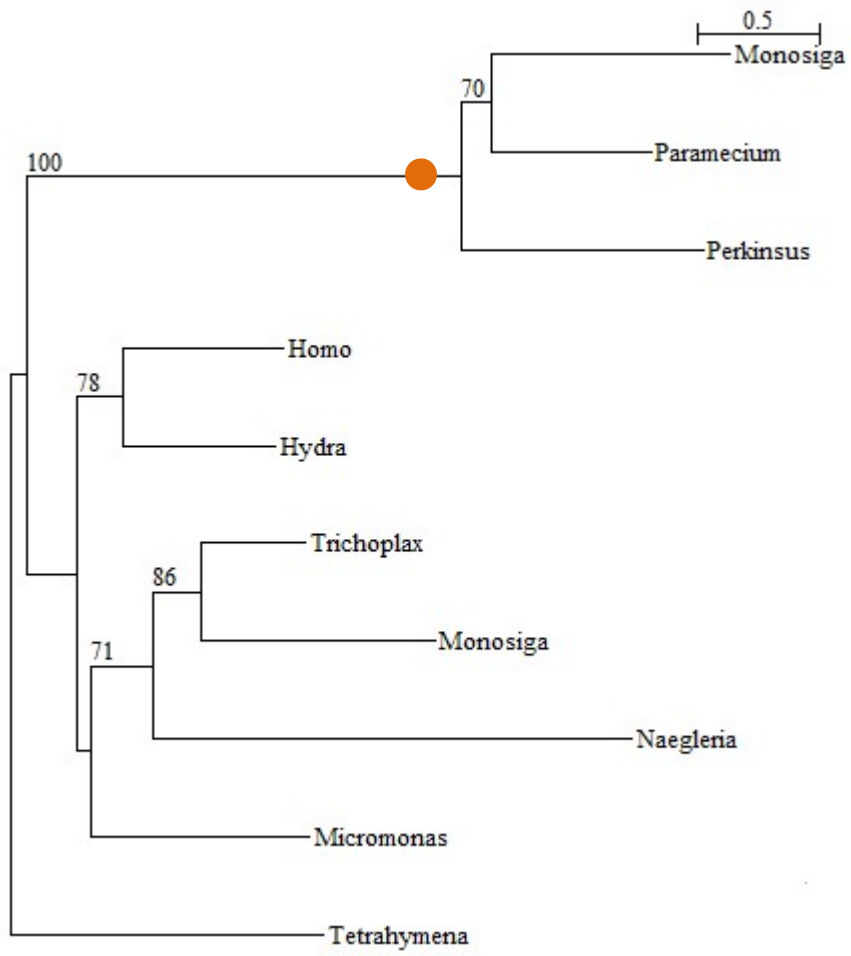

**Figure S68.** Phylogeny of acid ceramidase (GI No. 167517231).

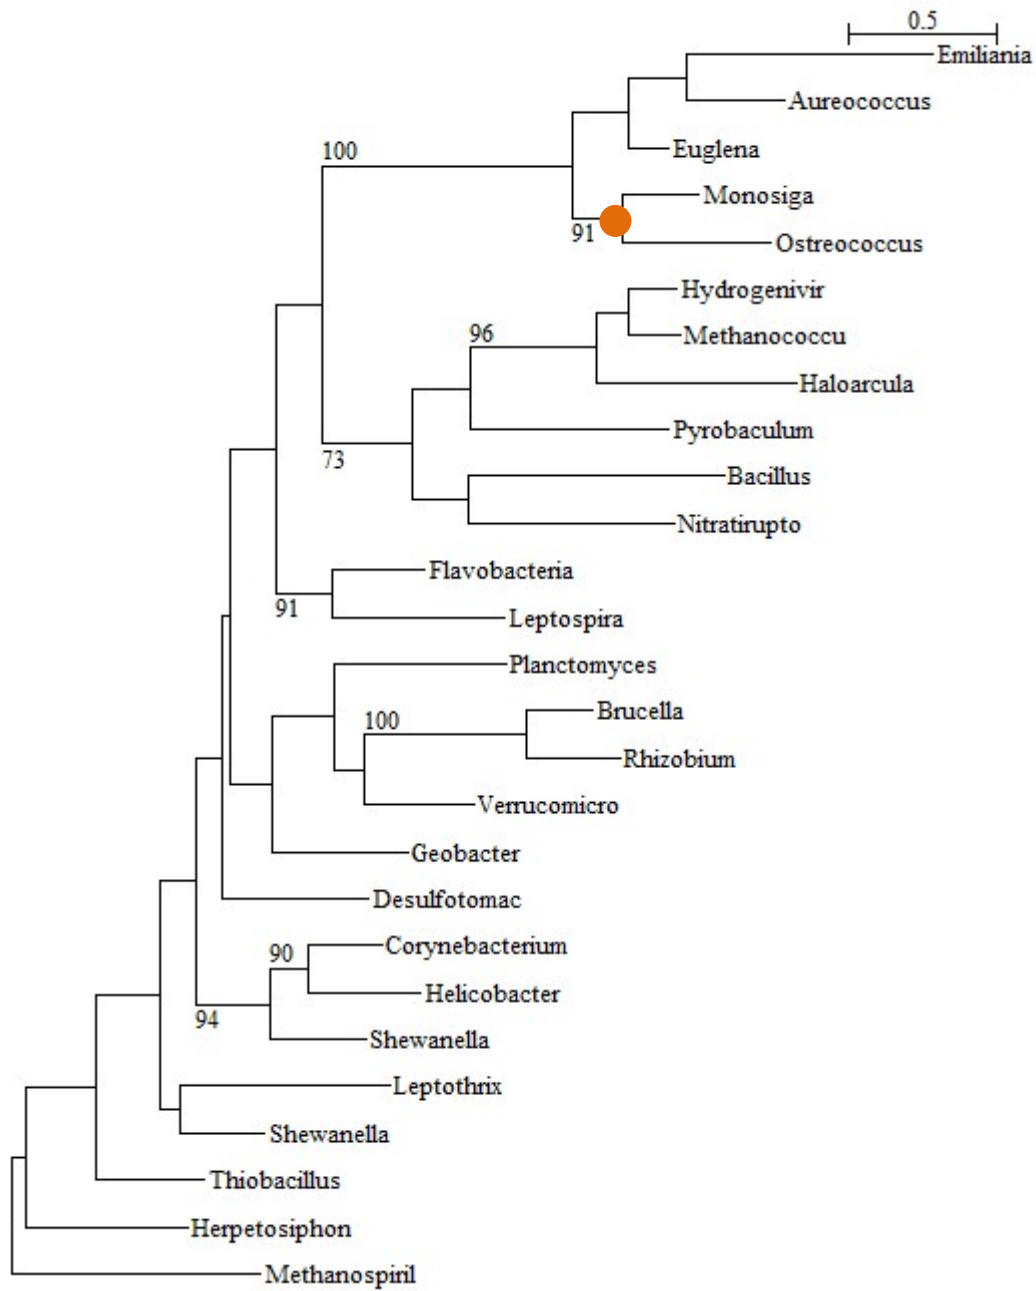

**Figure S69.** Phylogeny of one hypothetical protein (GI No. 167525567).

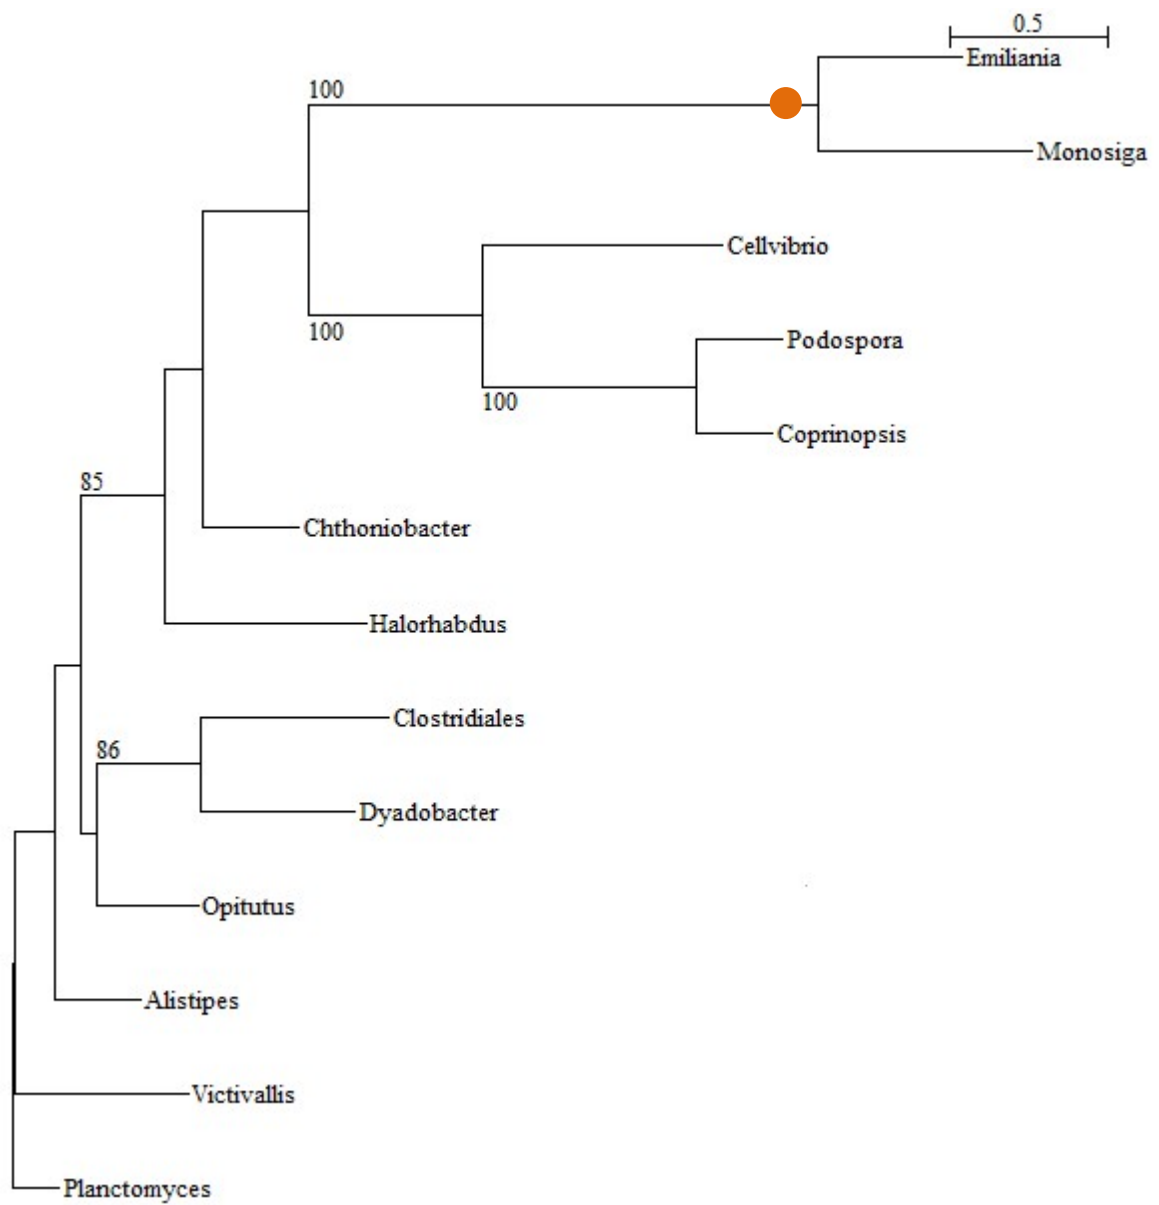

**Figure S70.** Phylogeny of one hypothetical protein (GI No. 167527021).

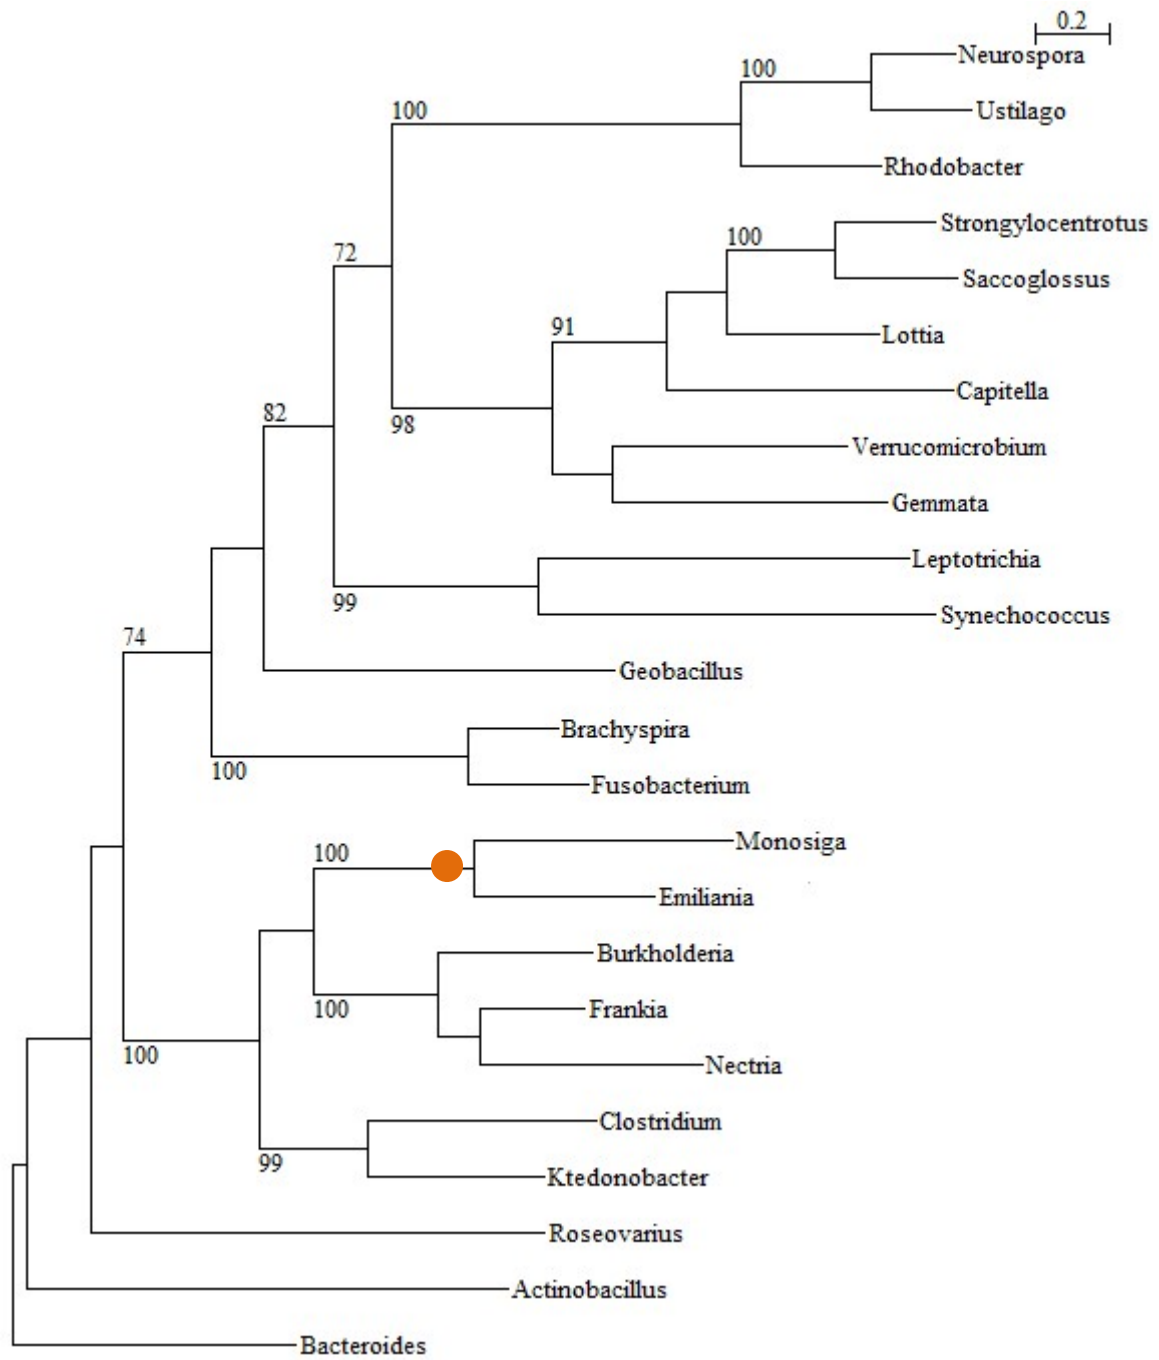

**Figure S71.** Phylogeny of sulfatase (GI No. 167527083).

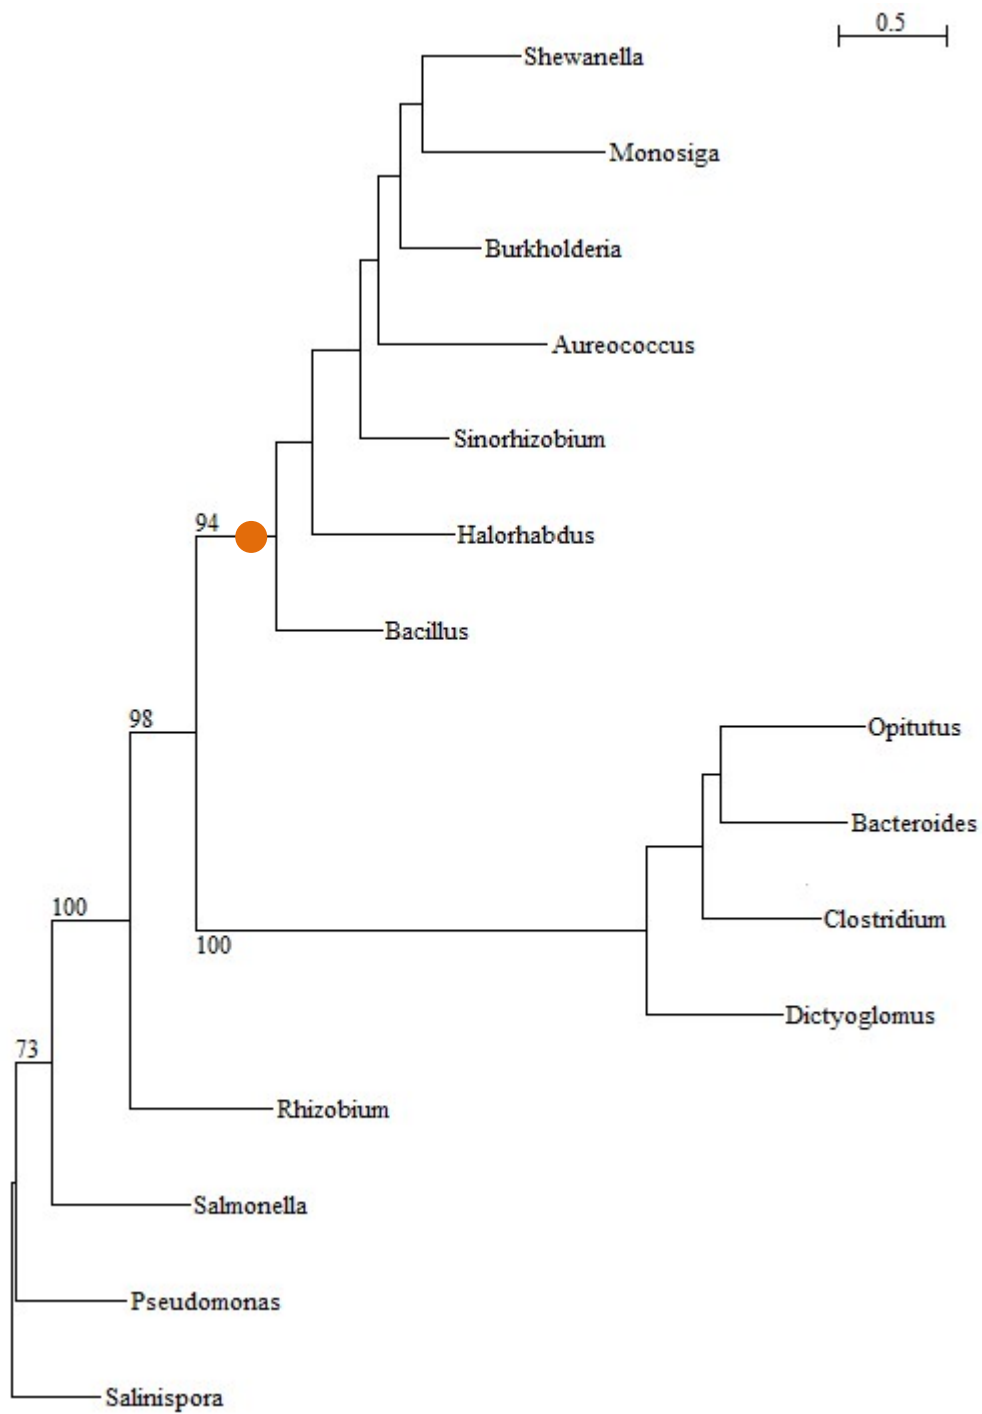

**Figure S72.** Phylogeny of N-acylglucosamine 2-epimerase (GI No. 167527127).



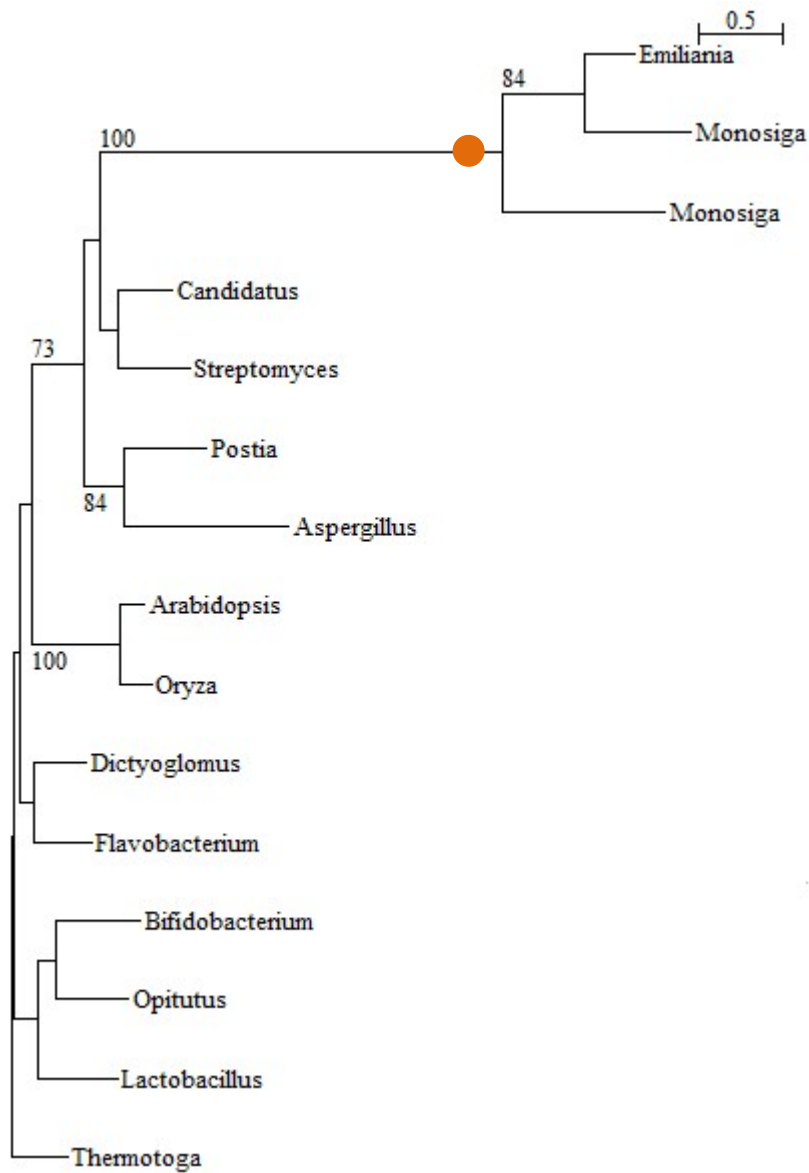

Figure S73. Phylogeny of alpha-L-arabinofuranosidase (GI No. 167533053 and 167519743).

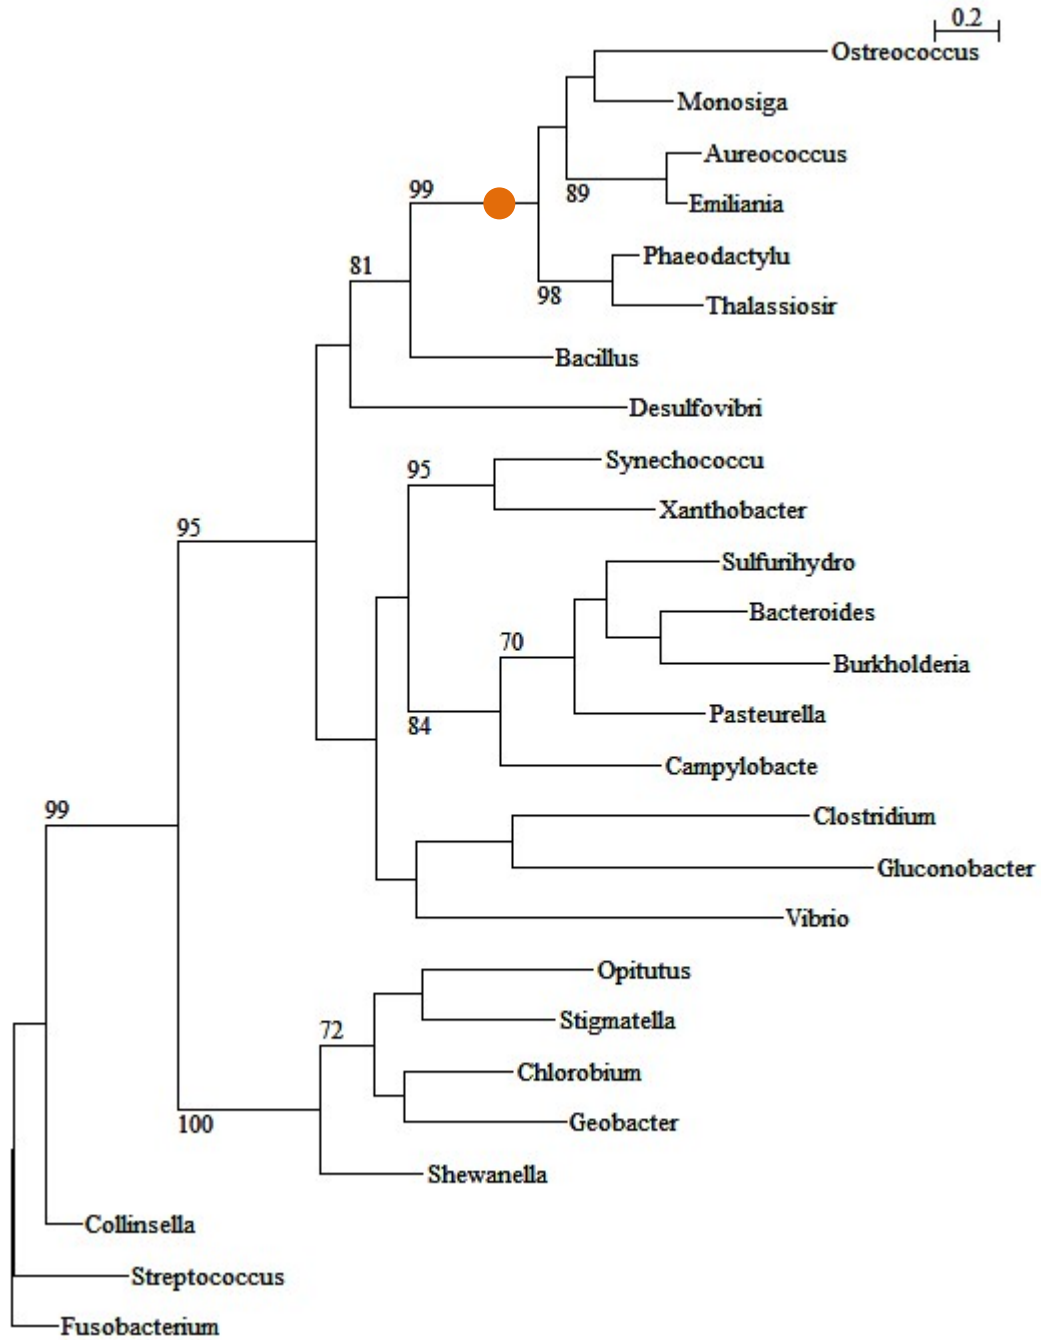

Figure S74. Phylogeny of one hypothetical protein (GI No. 167534047).

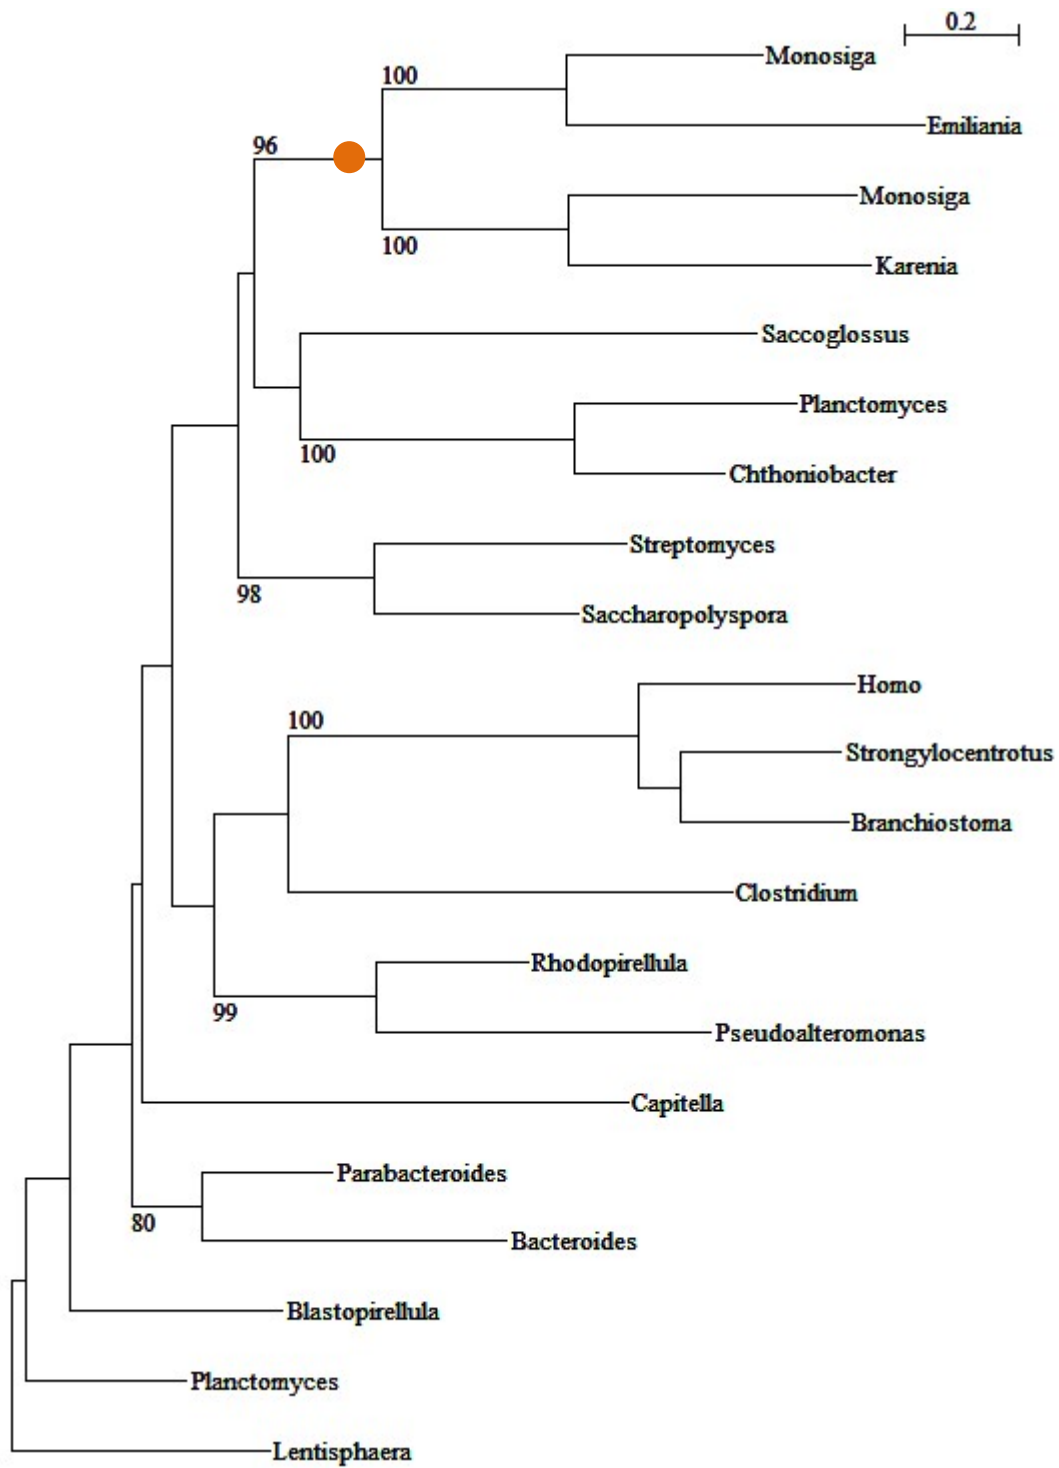

Figure S75. Phylogeny of sialidase (Gi No. 167535145 and 167534965).

0.2

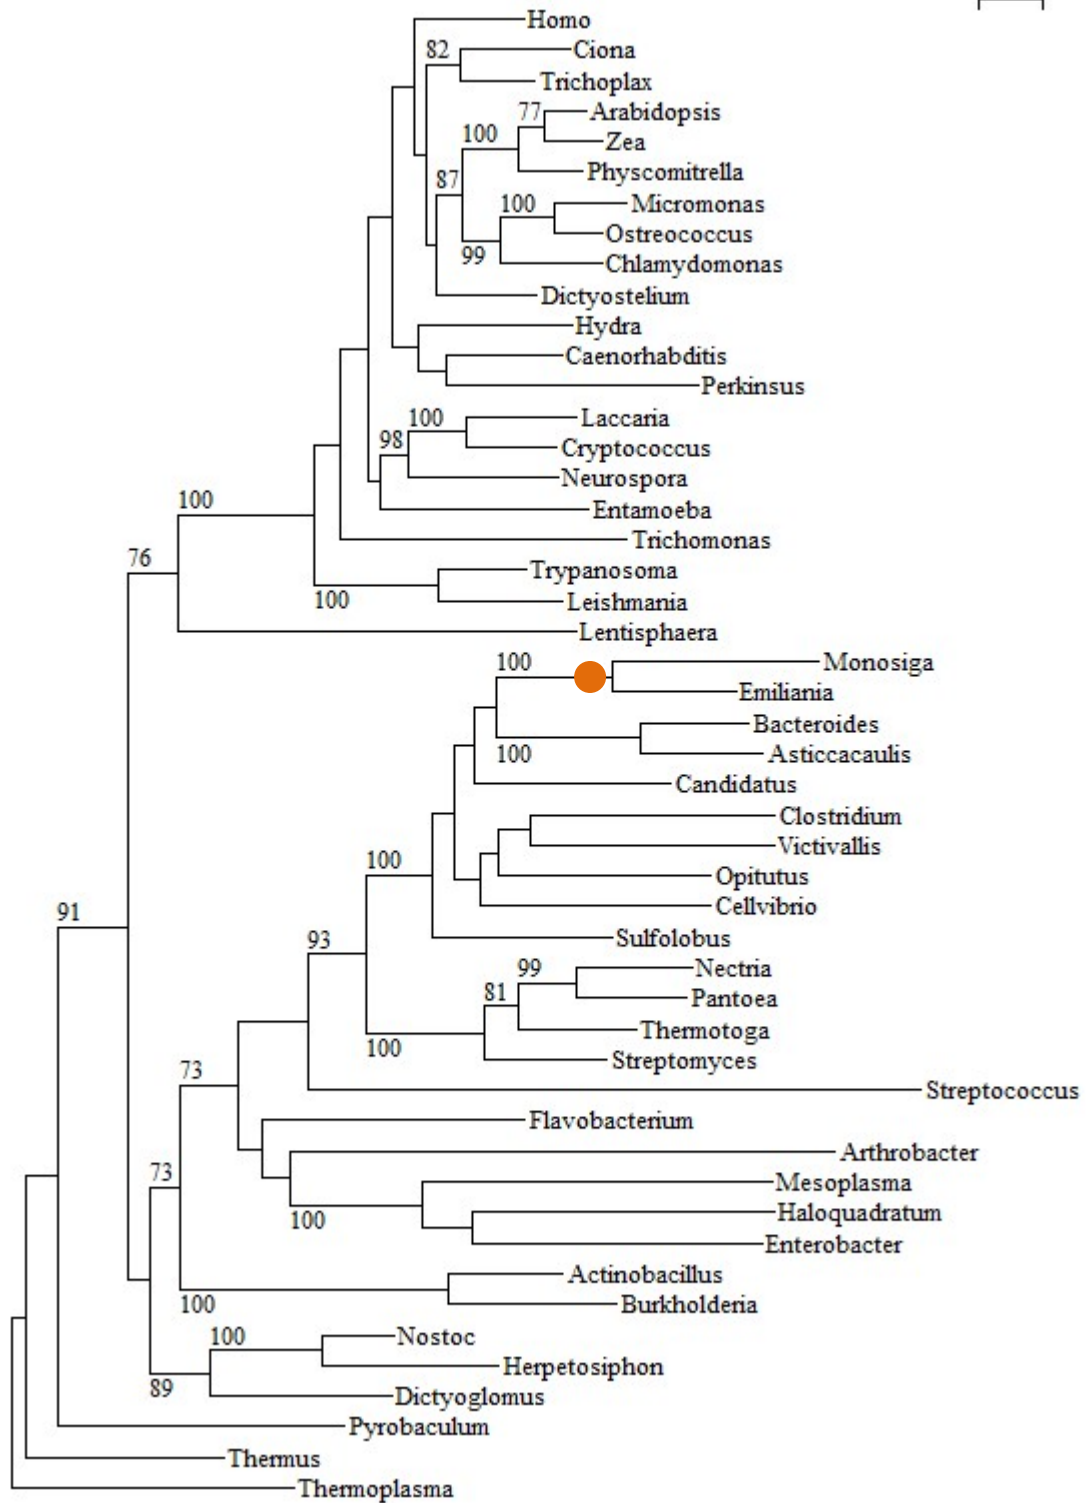

Figure S76. Phylogeny of alpha-glucosidase (GI No. 167536698).

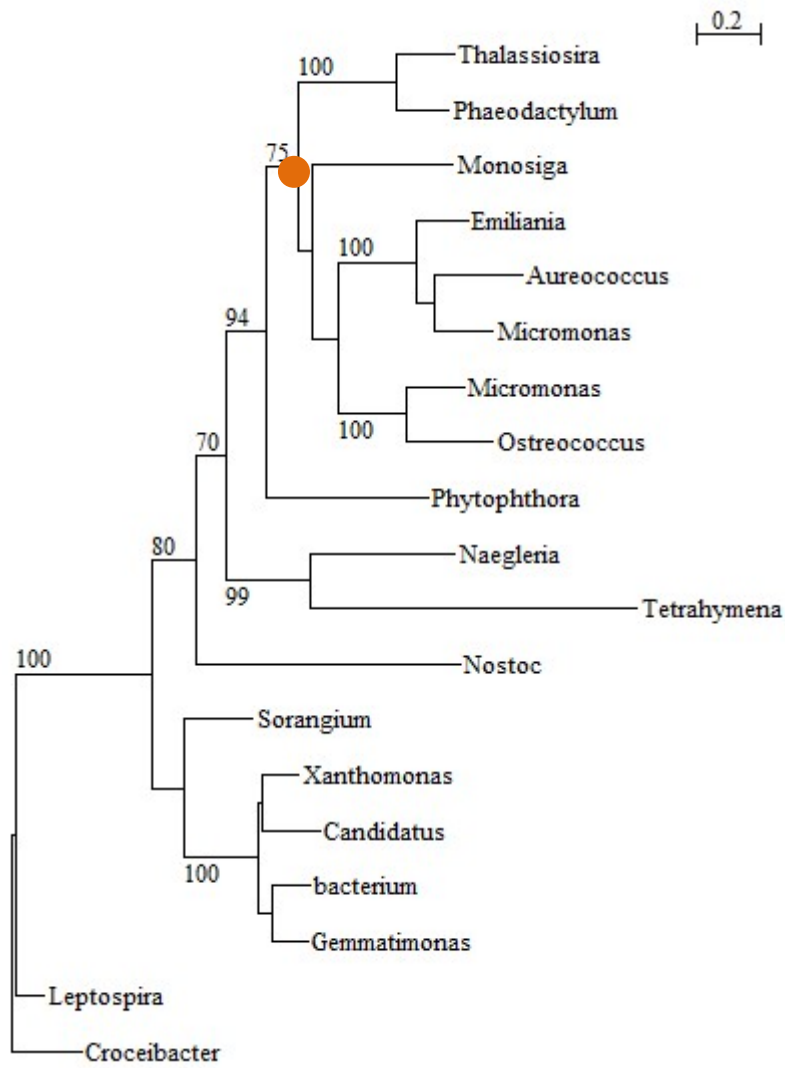

Figure S77. Phylogeny of oxidoreductase (GI No. 167538446).

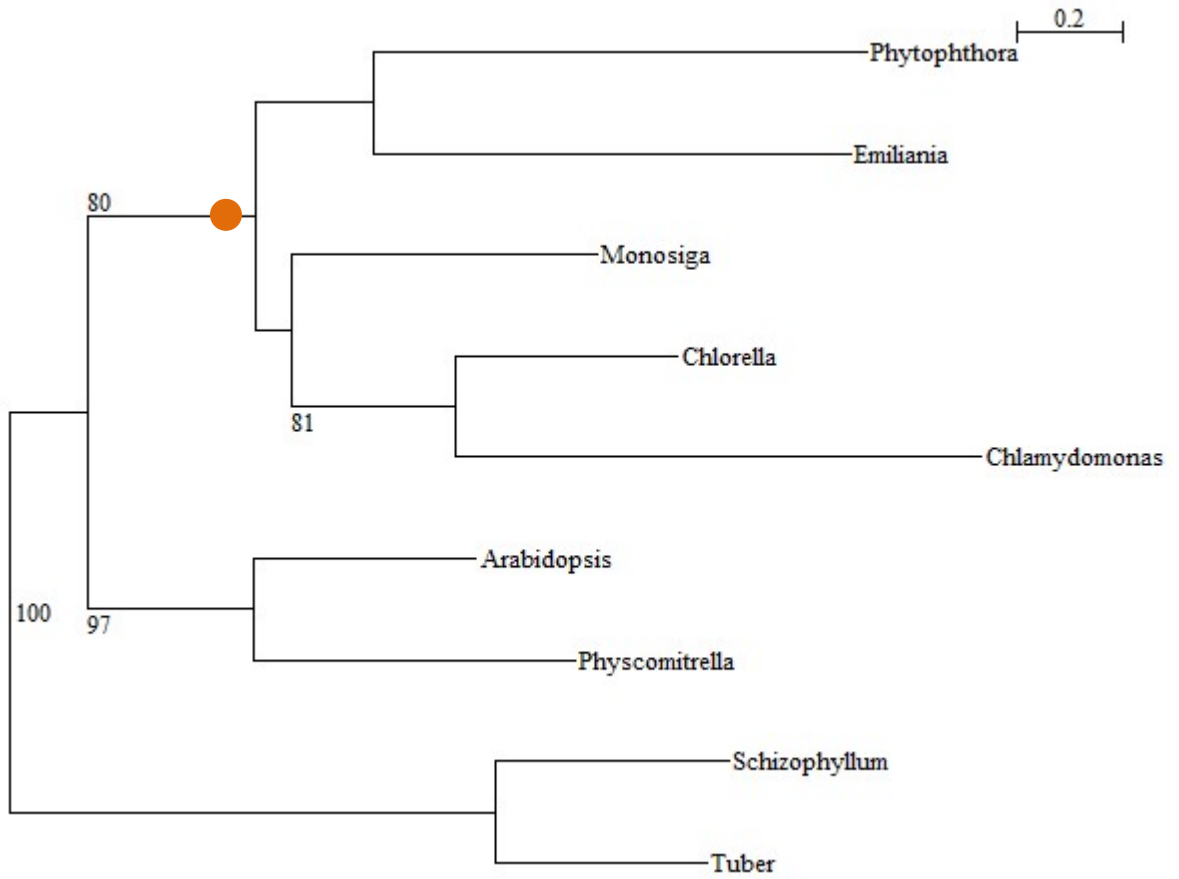

Figure S78. Phylogeny of one hypothetical protein (GI No. 167516576).

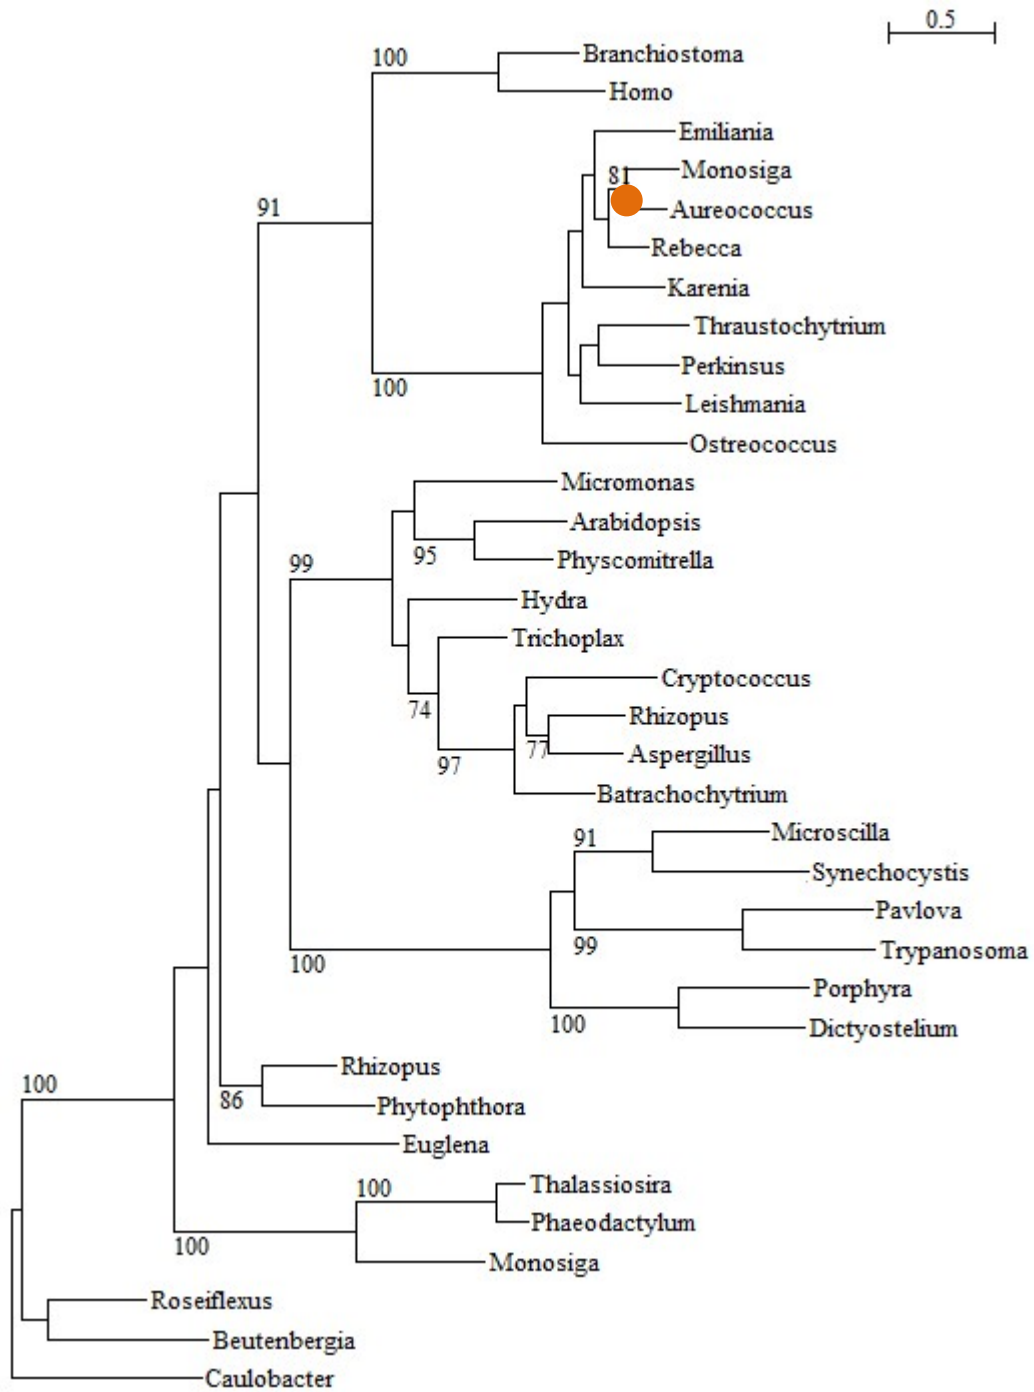

Figure S79. Phylogeny of delta-5 desaturase (GI No. 167518353).

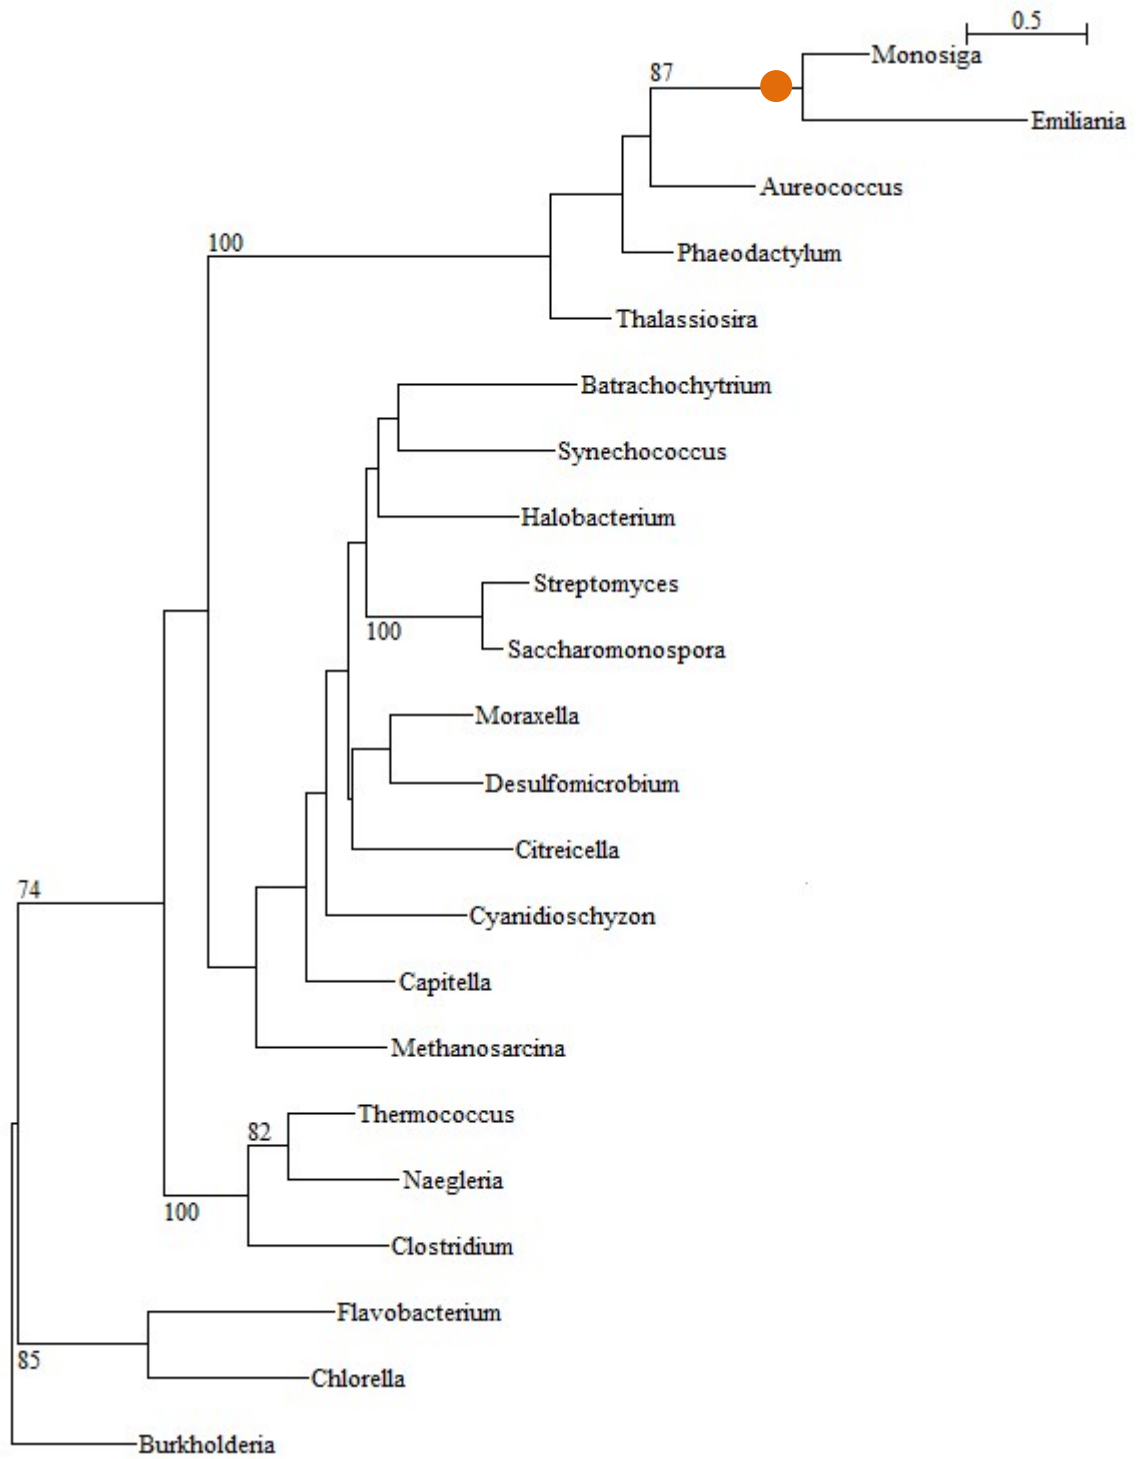

Figure S80. Phylogeny of one hypothetical protein (GI No. 167520576).



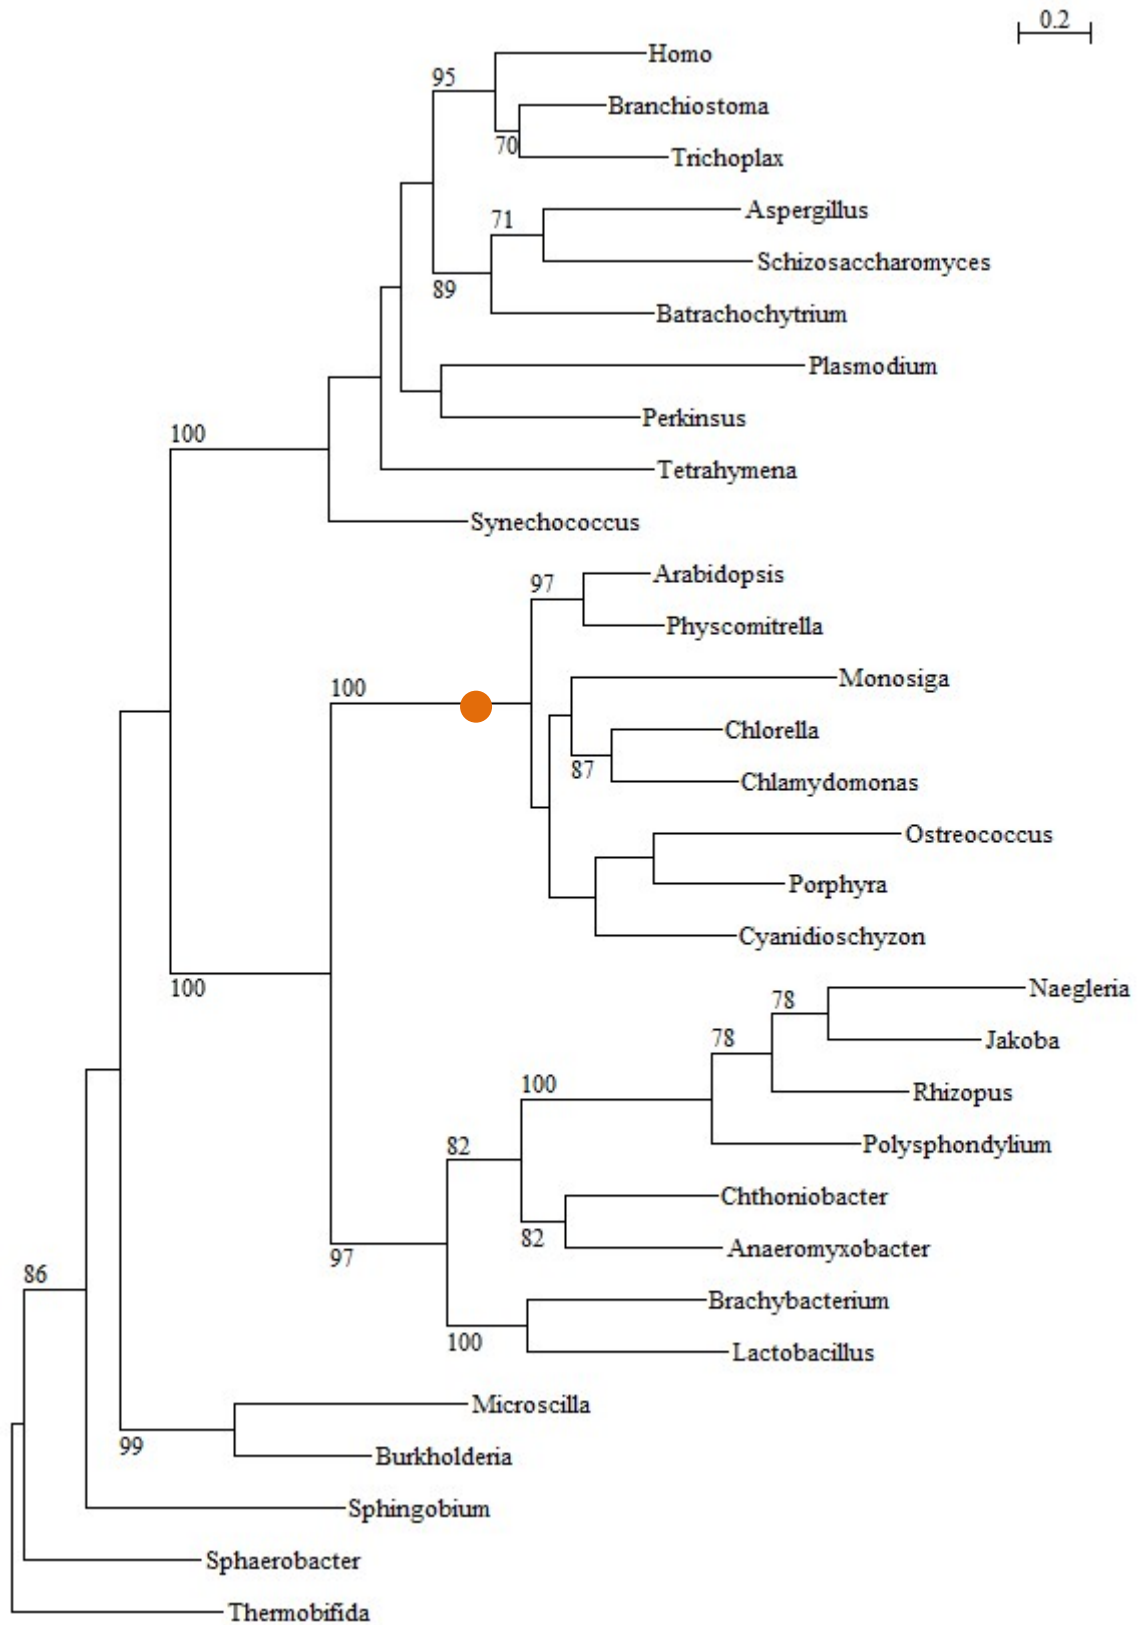

Figure S81. Phylogeny of monodehydroascorbate reductase (GI No. 167522575).

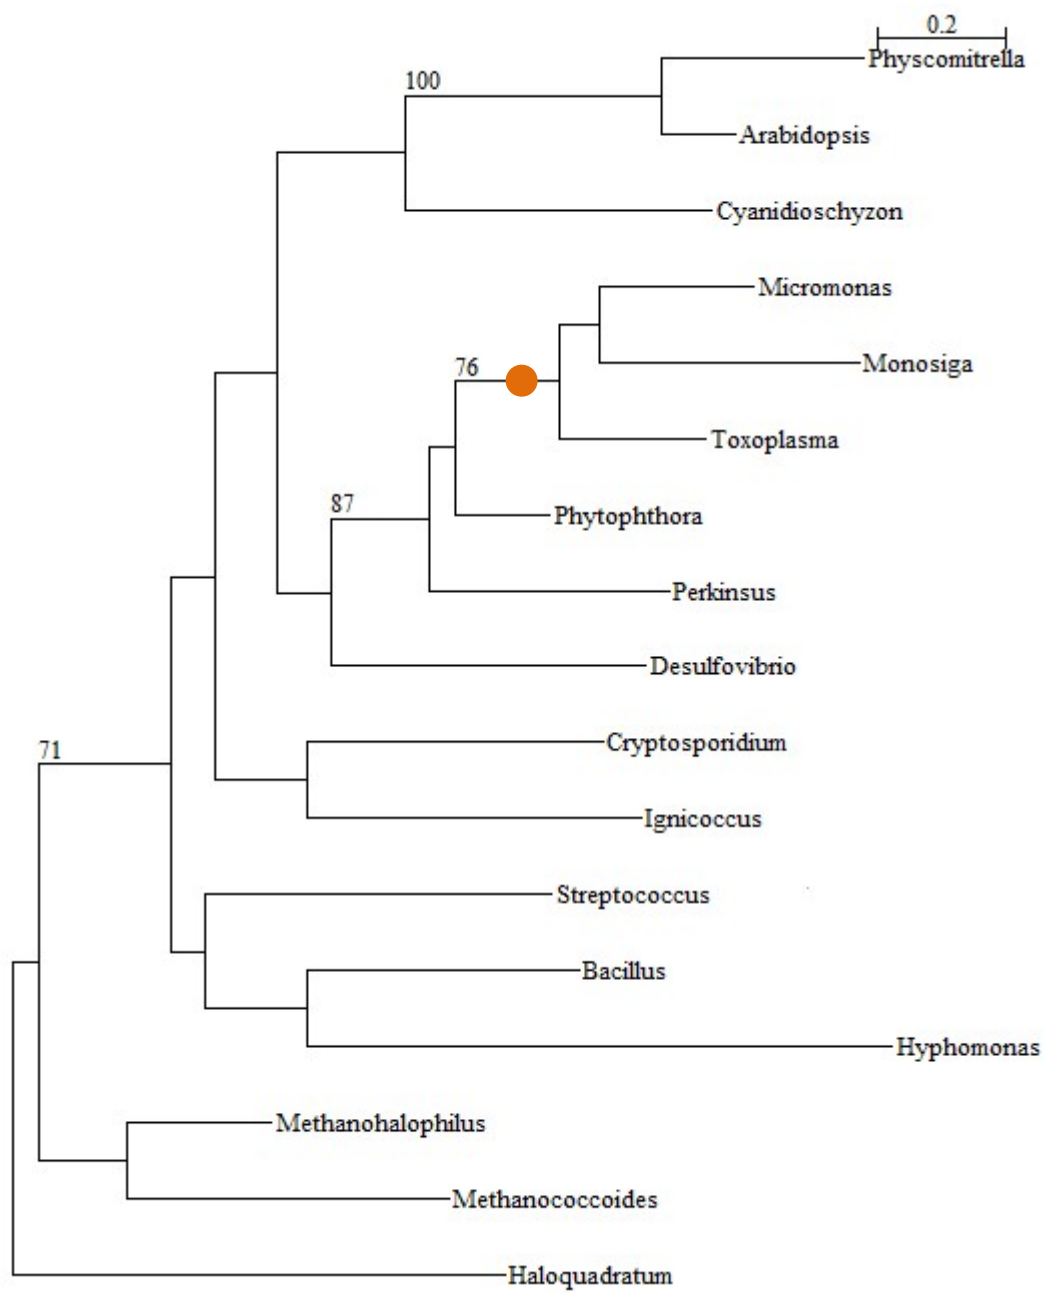

Figure S82. Phylogeny of one hypothetical protein (GI No. 167522591).

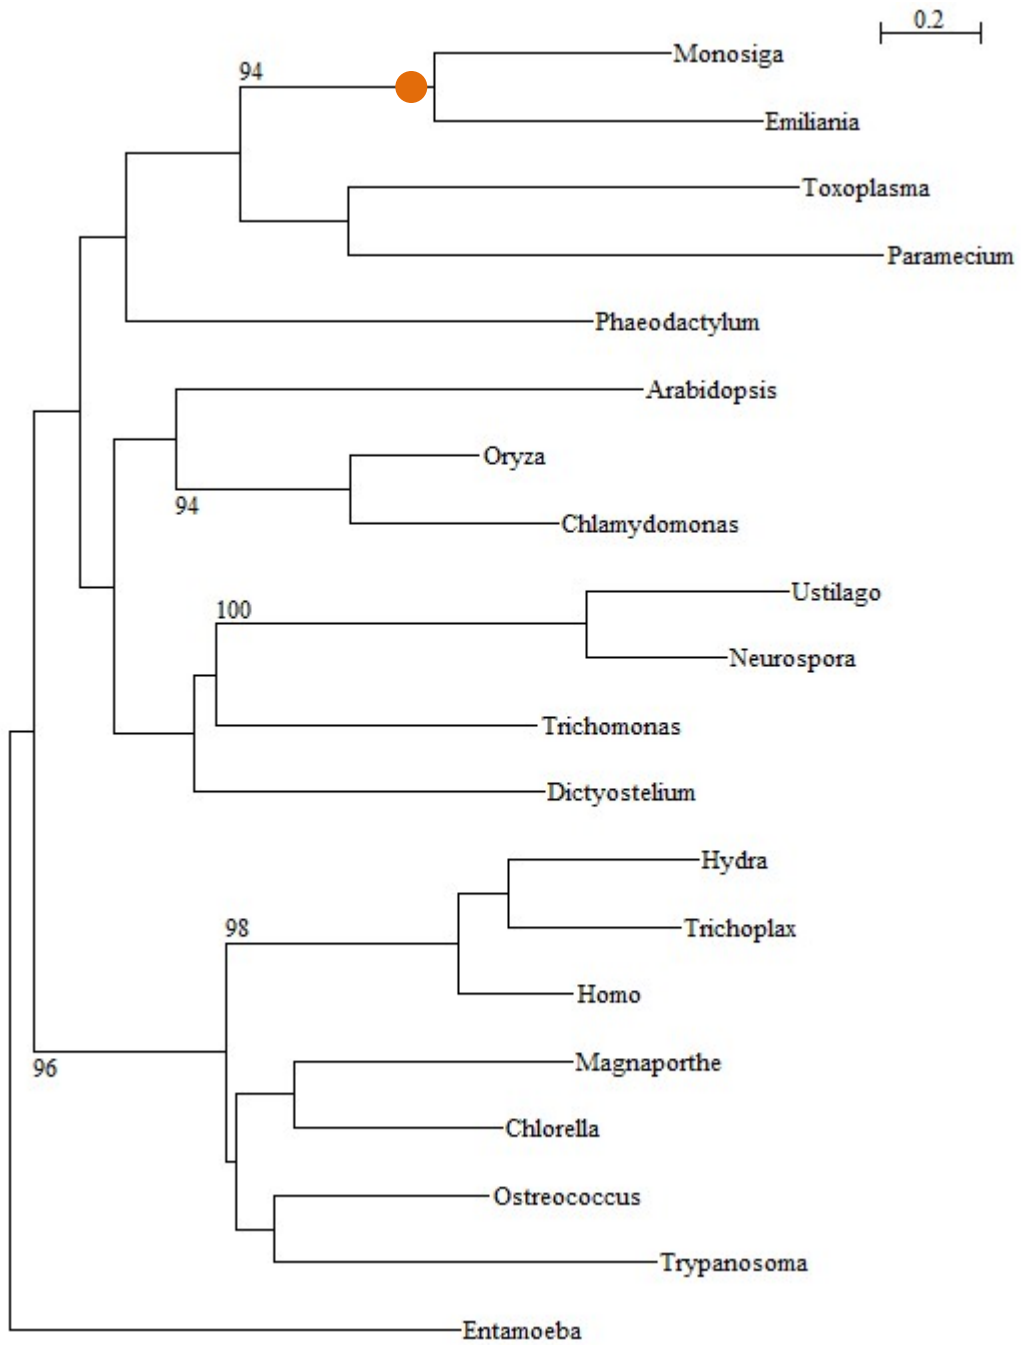

Figure S83. Phylogeny of protein phosphatase 2C (GI No. 167522497).

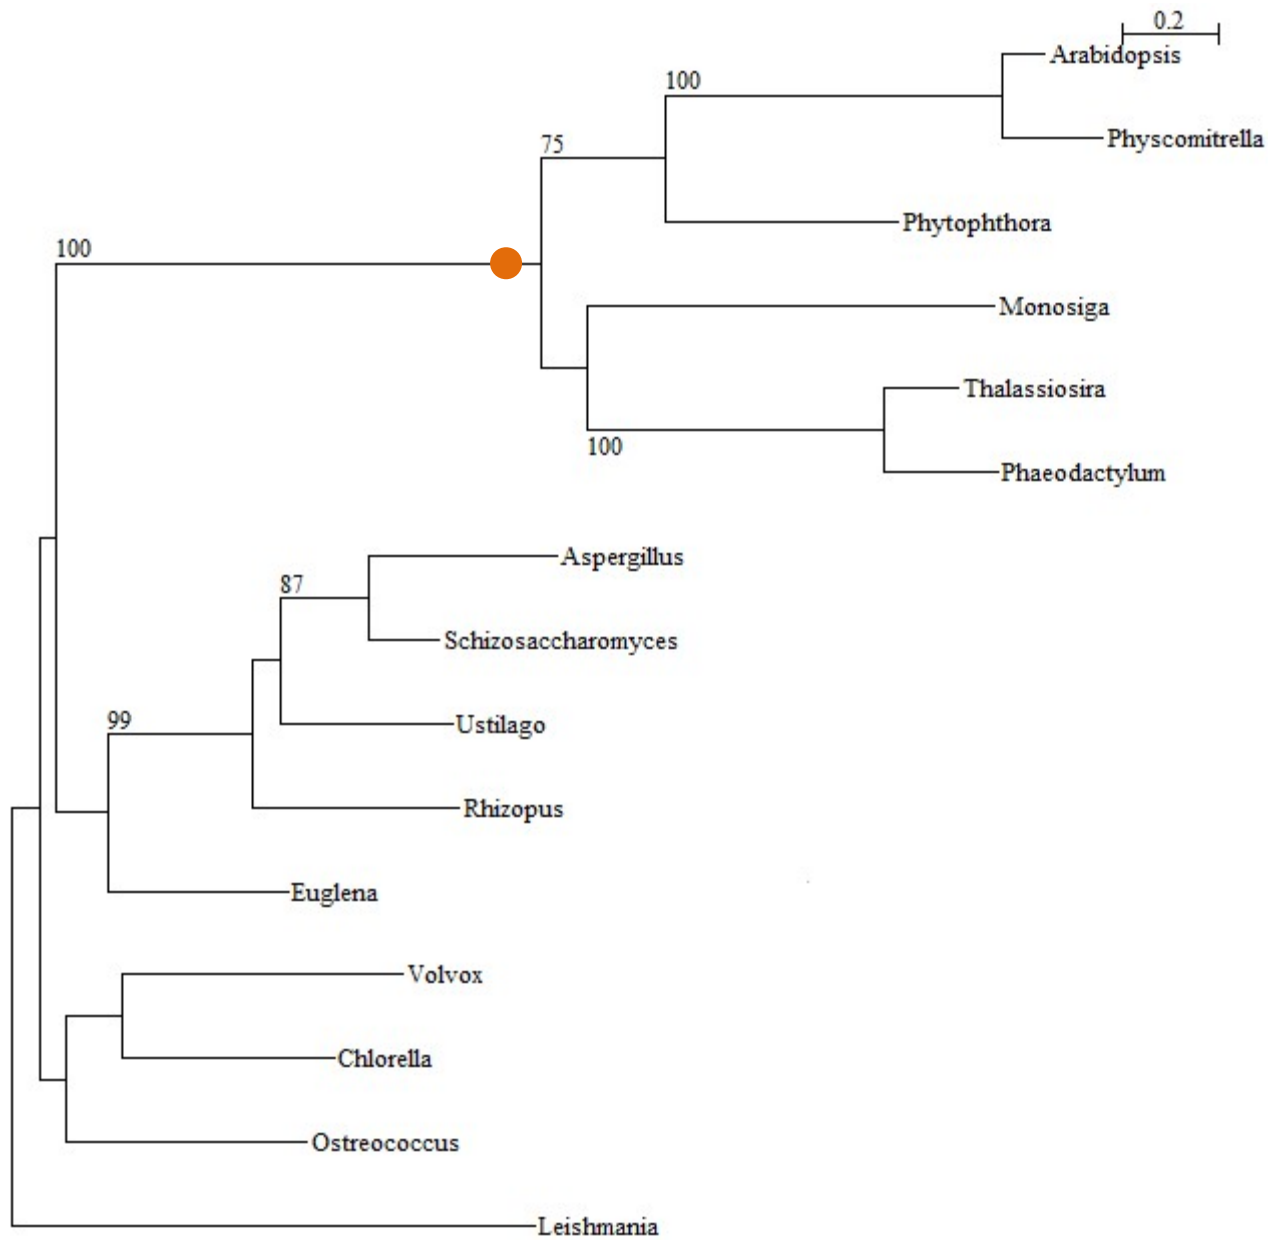

Figure S84. Phylogeny of phosphatidate-sterol O-acyltransferase (GI No. 167525286).

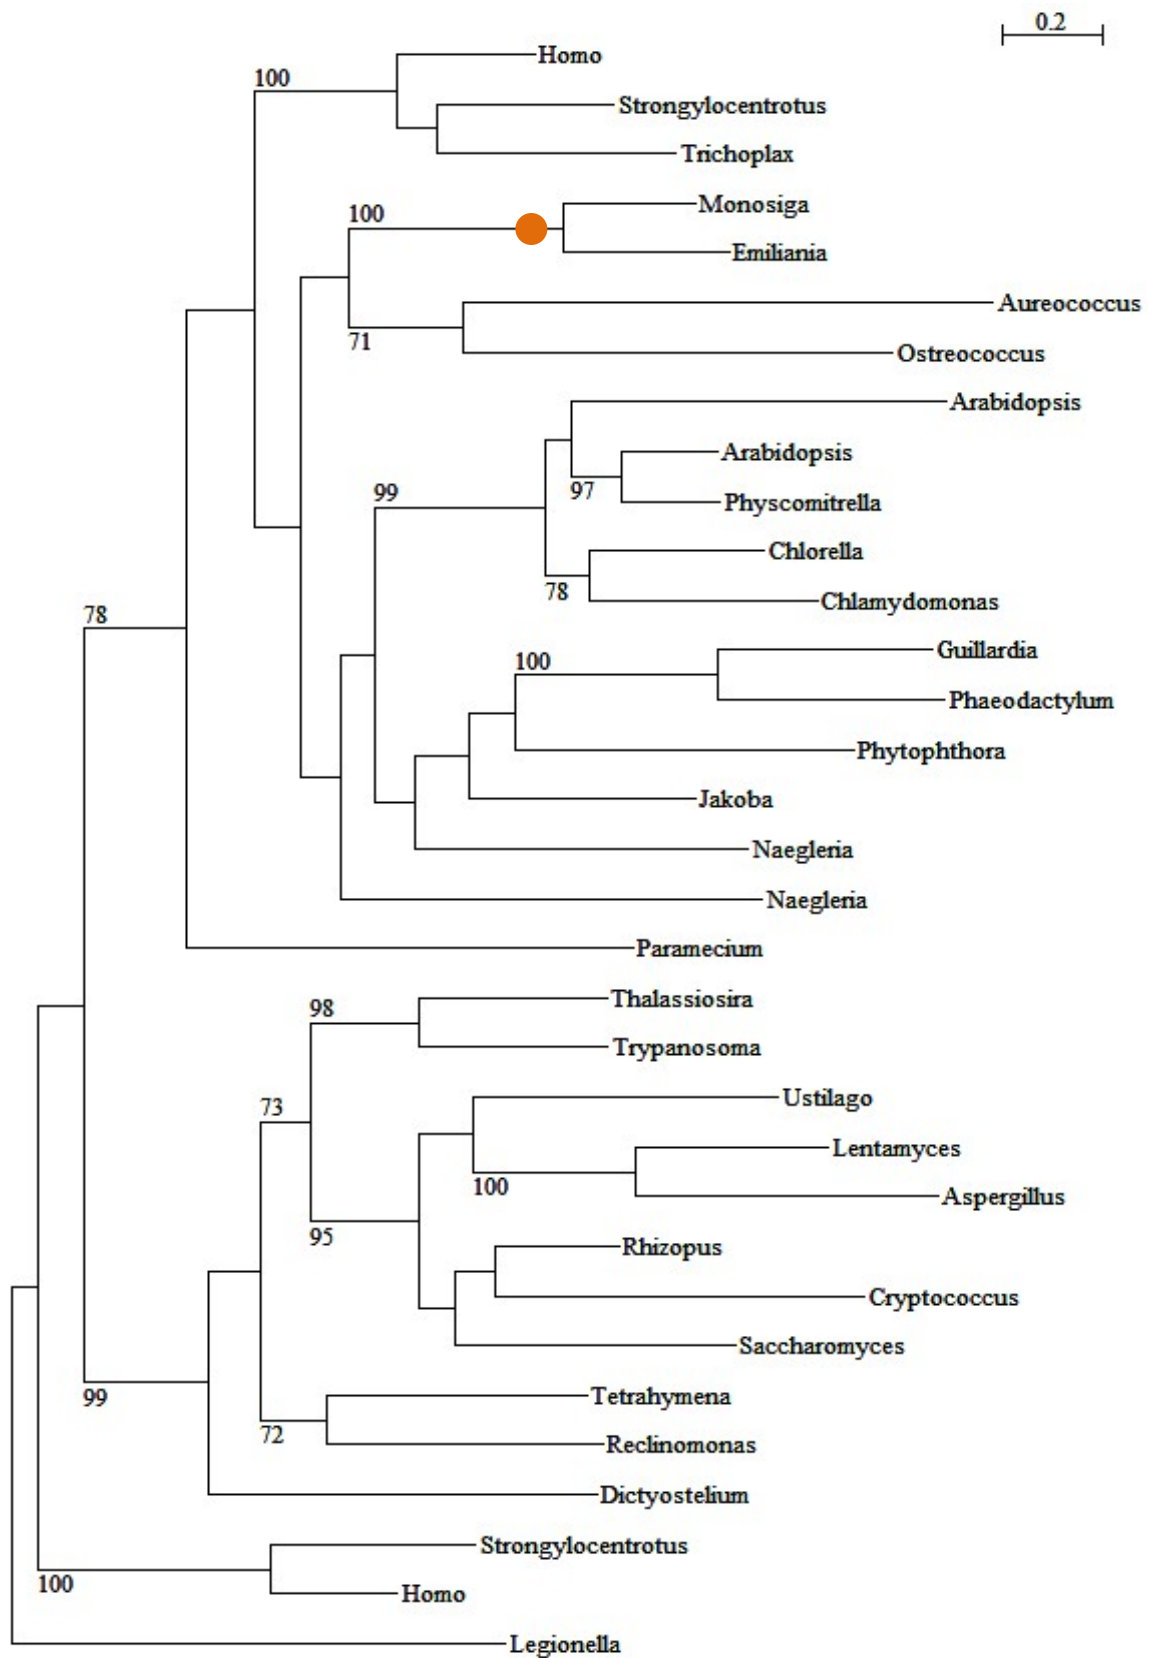

Figure S85. Phylogeny of serine carboxypeptidase (GI No. 167526595).

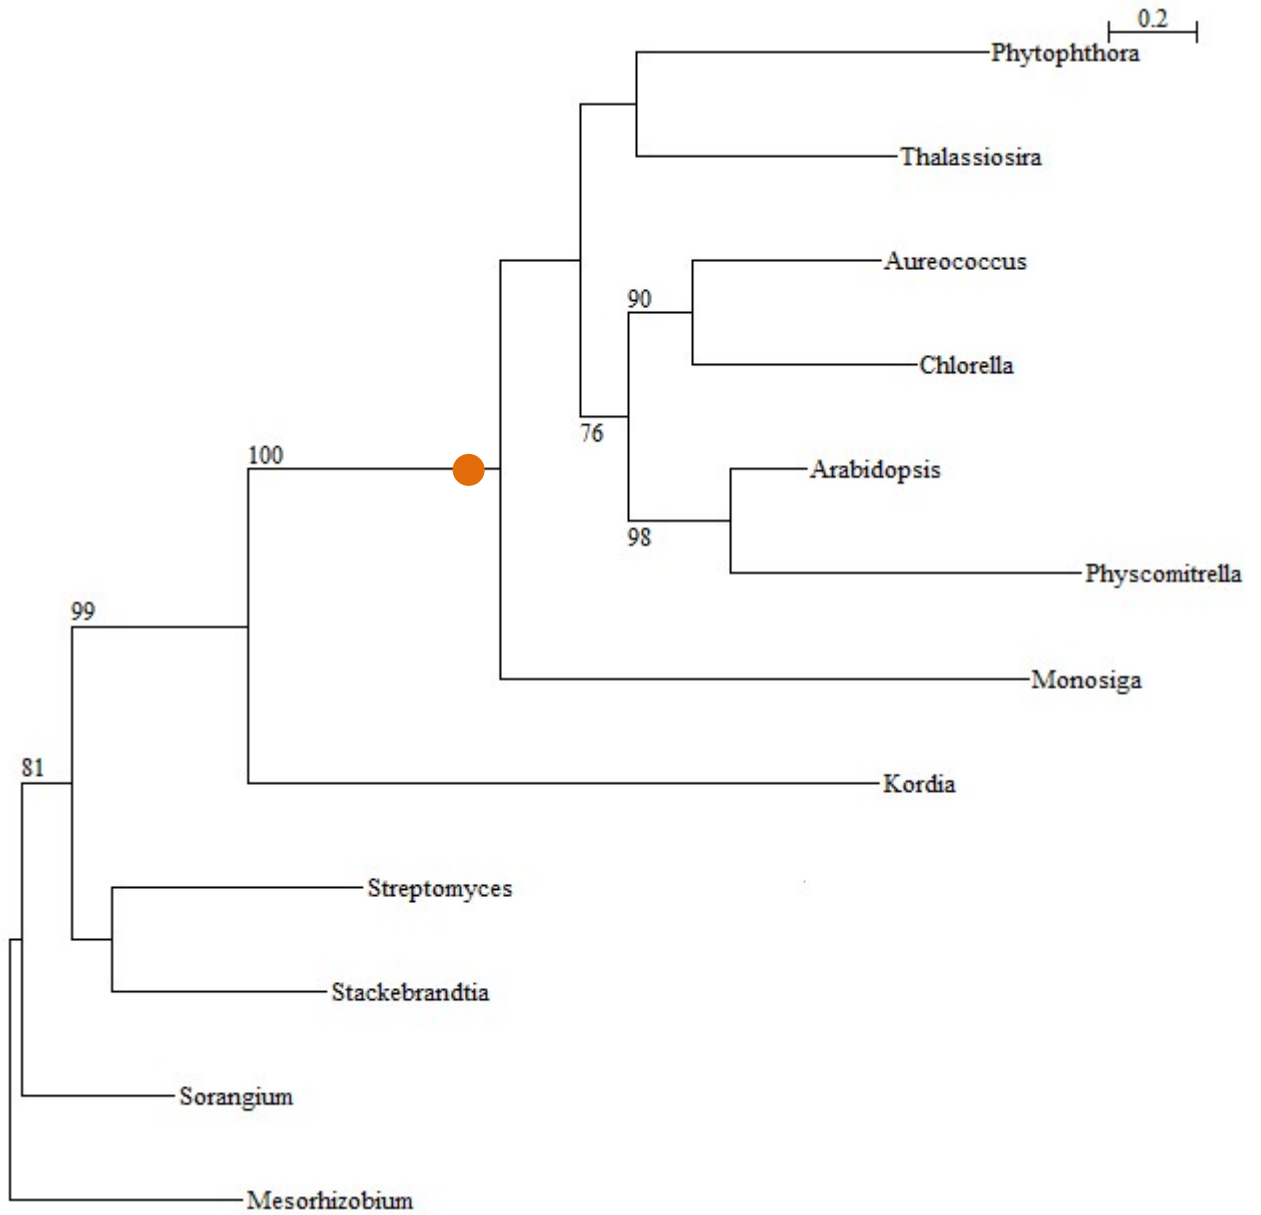

Figure S86. Phylogeny of ion channel protein (GI No. 167534102).

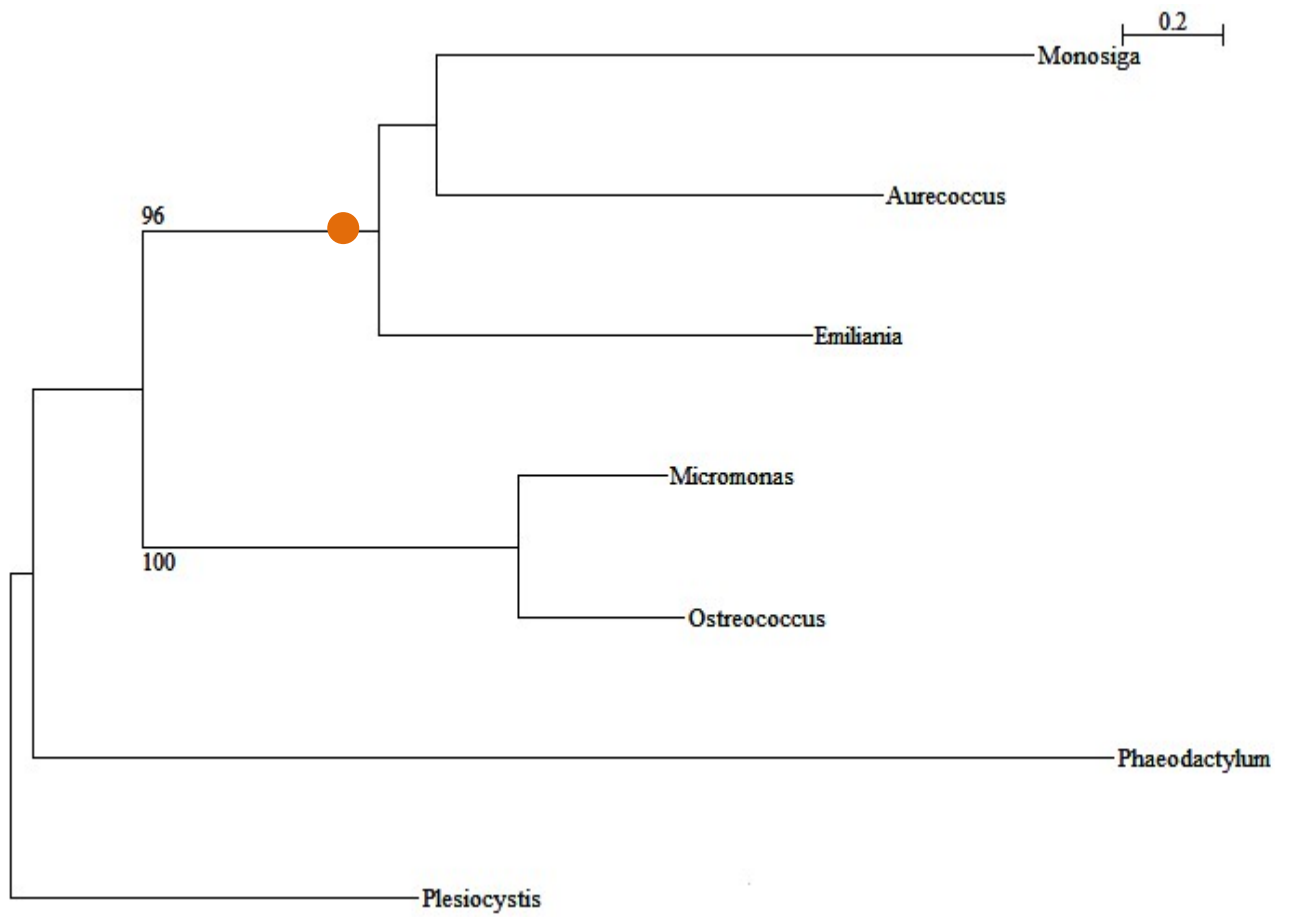

Figure S87. Phylogeny of one hypothetical protein (GI No. 167534124).

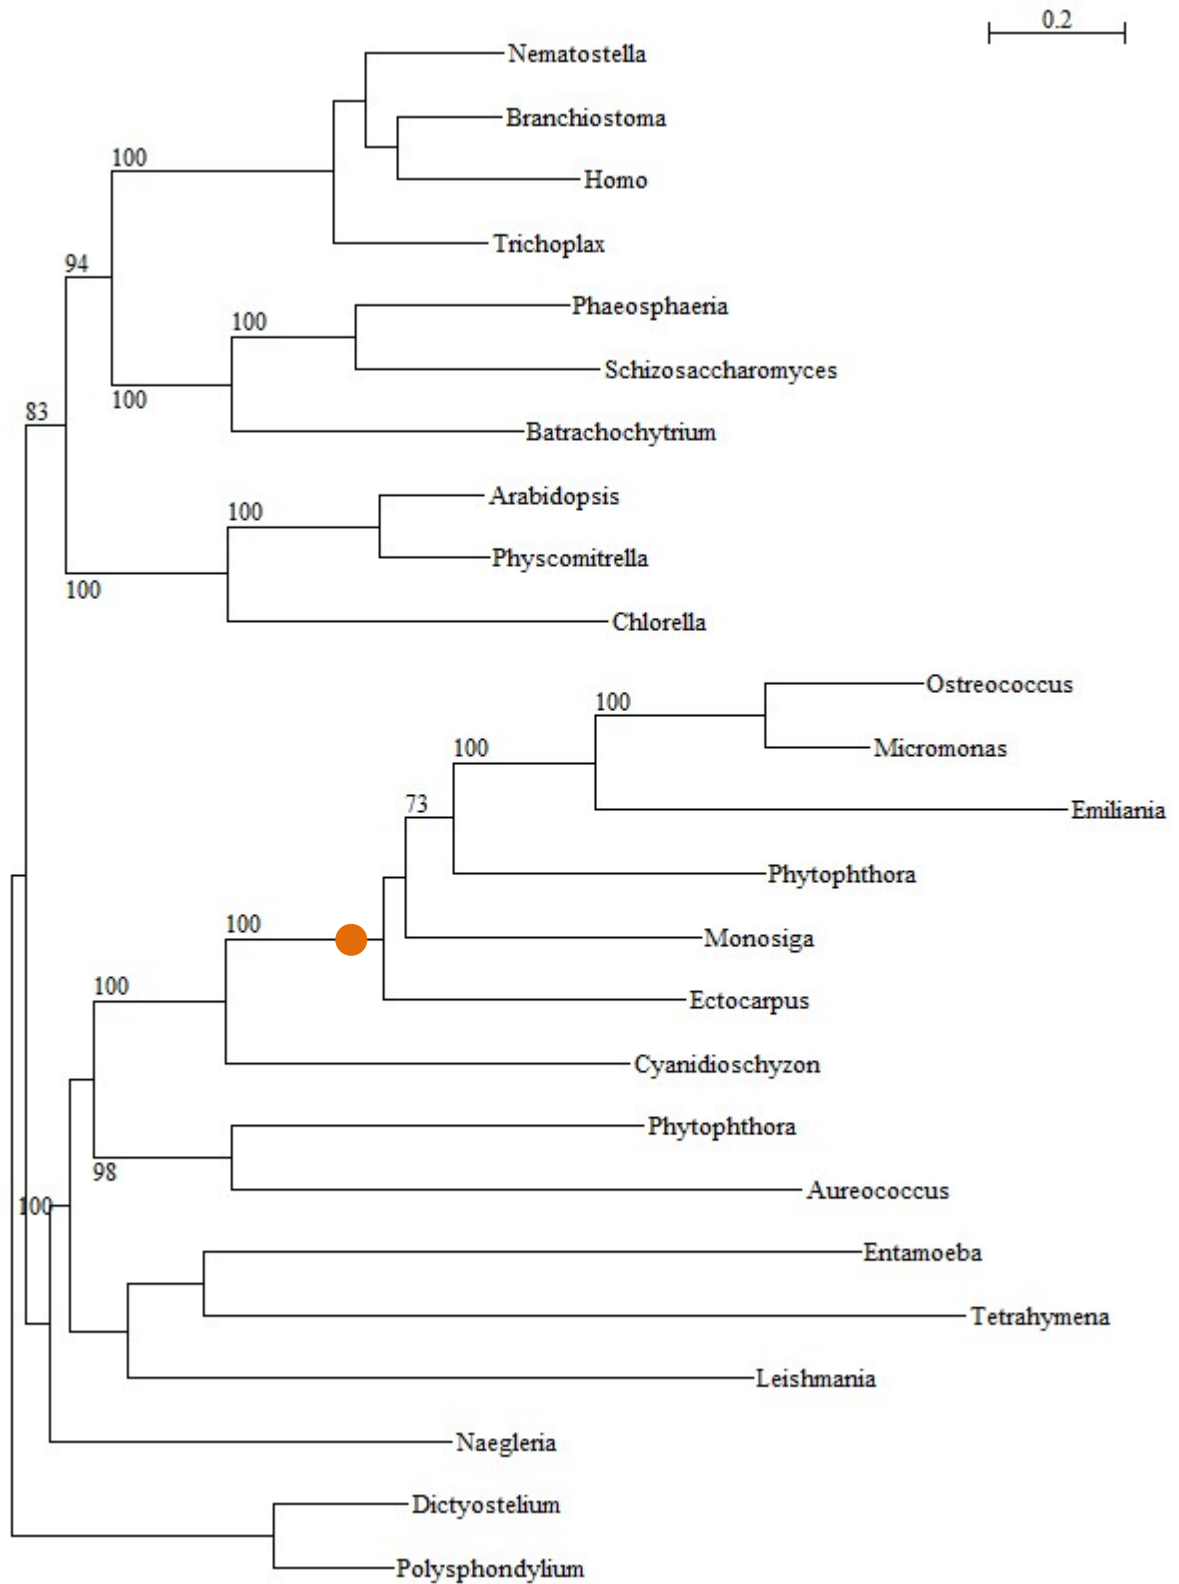

Figure S88. Phylogeny of p-type ATPase (GI No. 167534304).



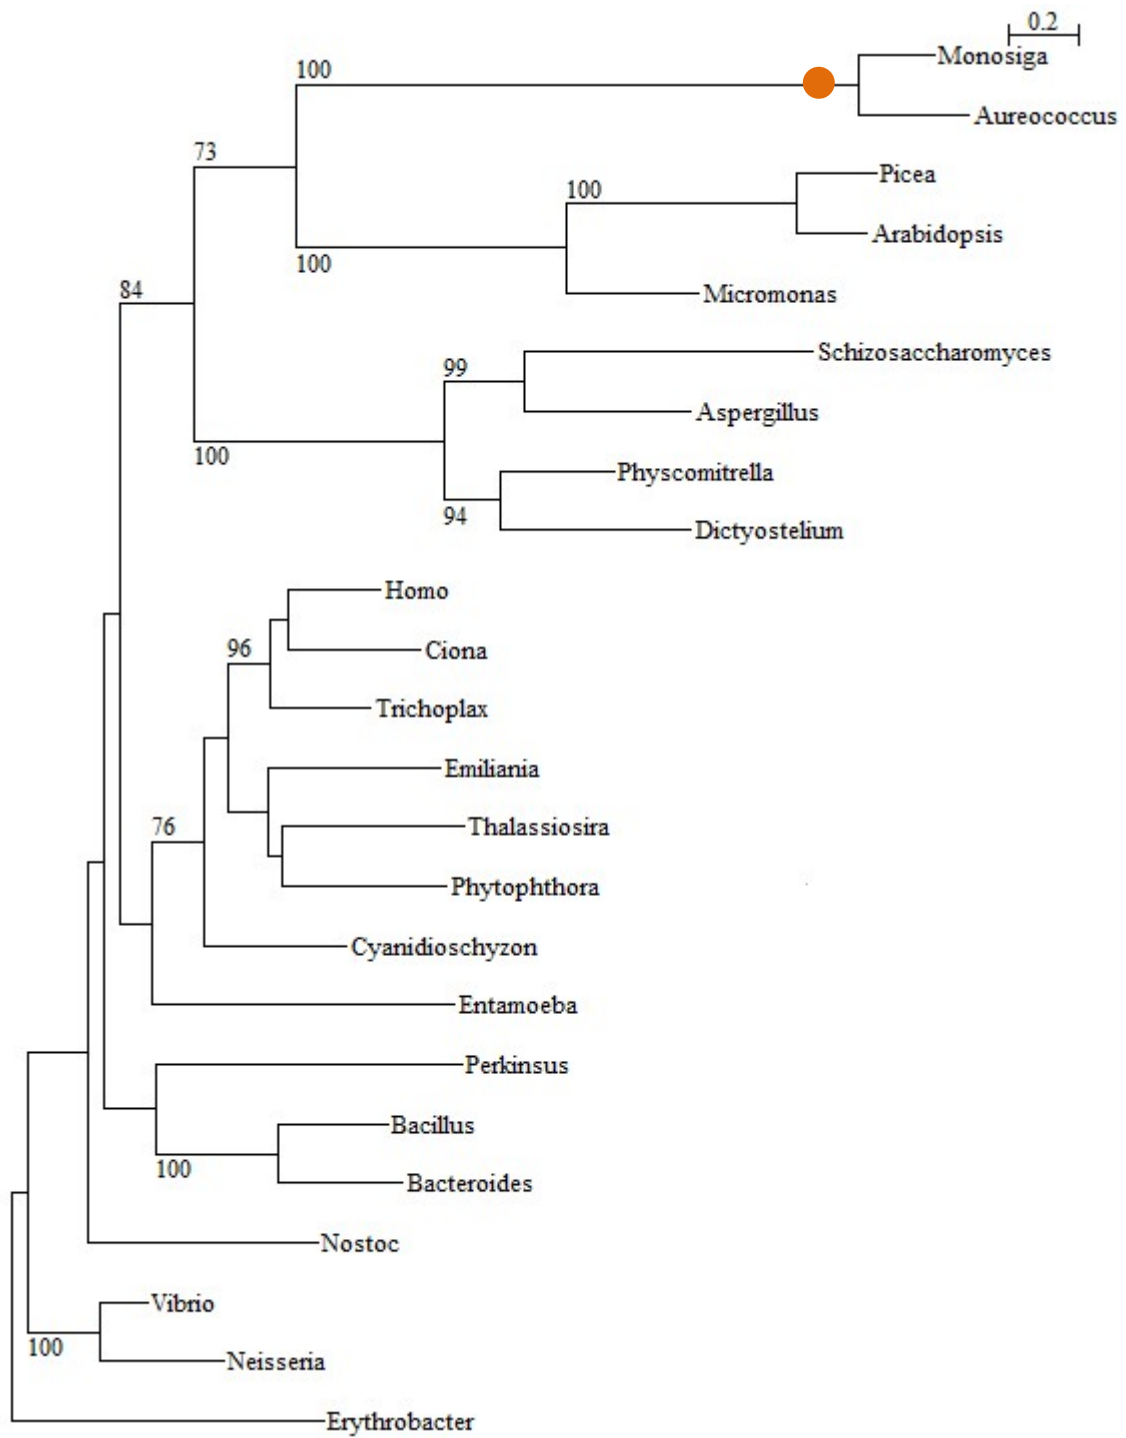

Figure S89. Phylogeny of galactokinase (GI No. 167535085).

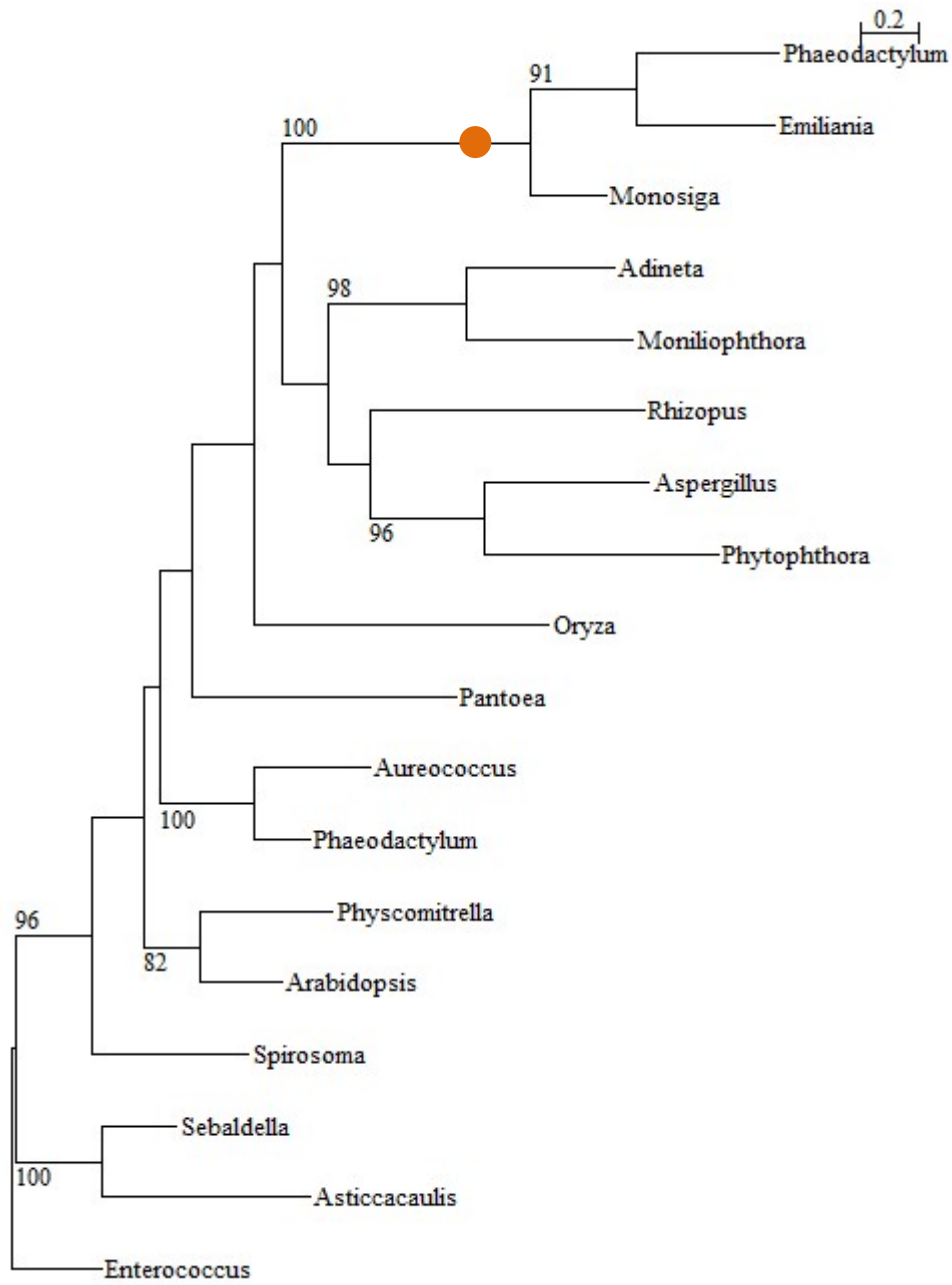

Figure S90. Phylogeny of one hypothetical protein (GI No. 167535947).

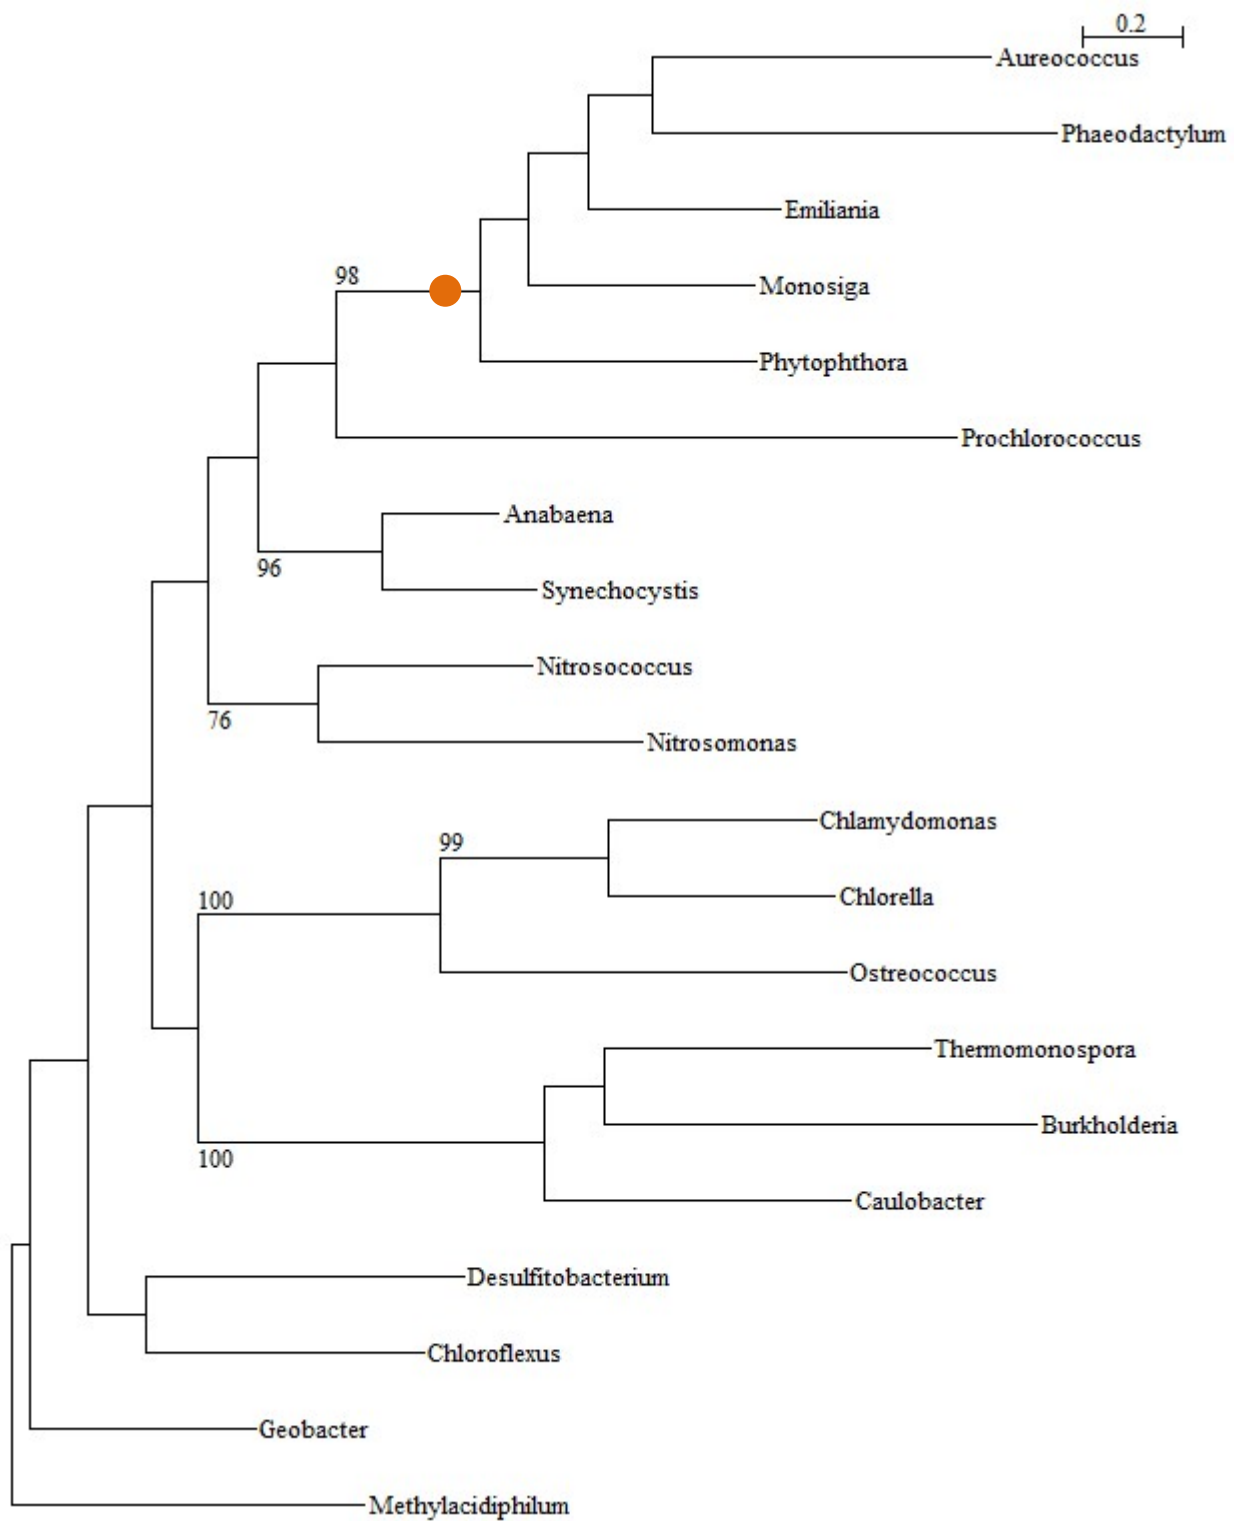

Figure S91. Phylogeny of glucokinase (GI No. 167537338).

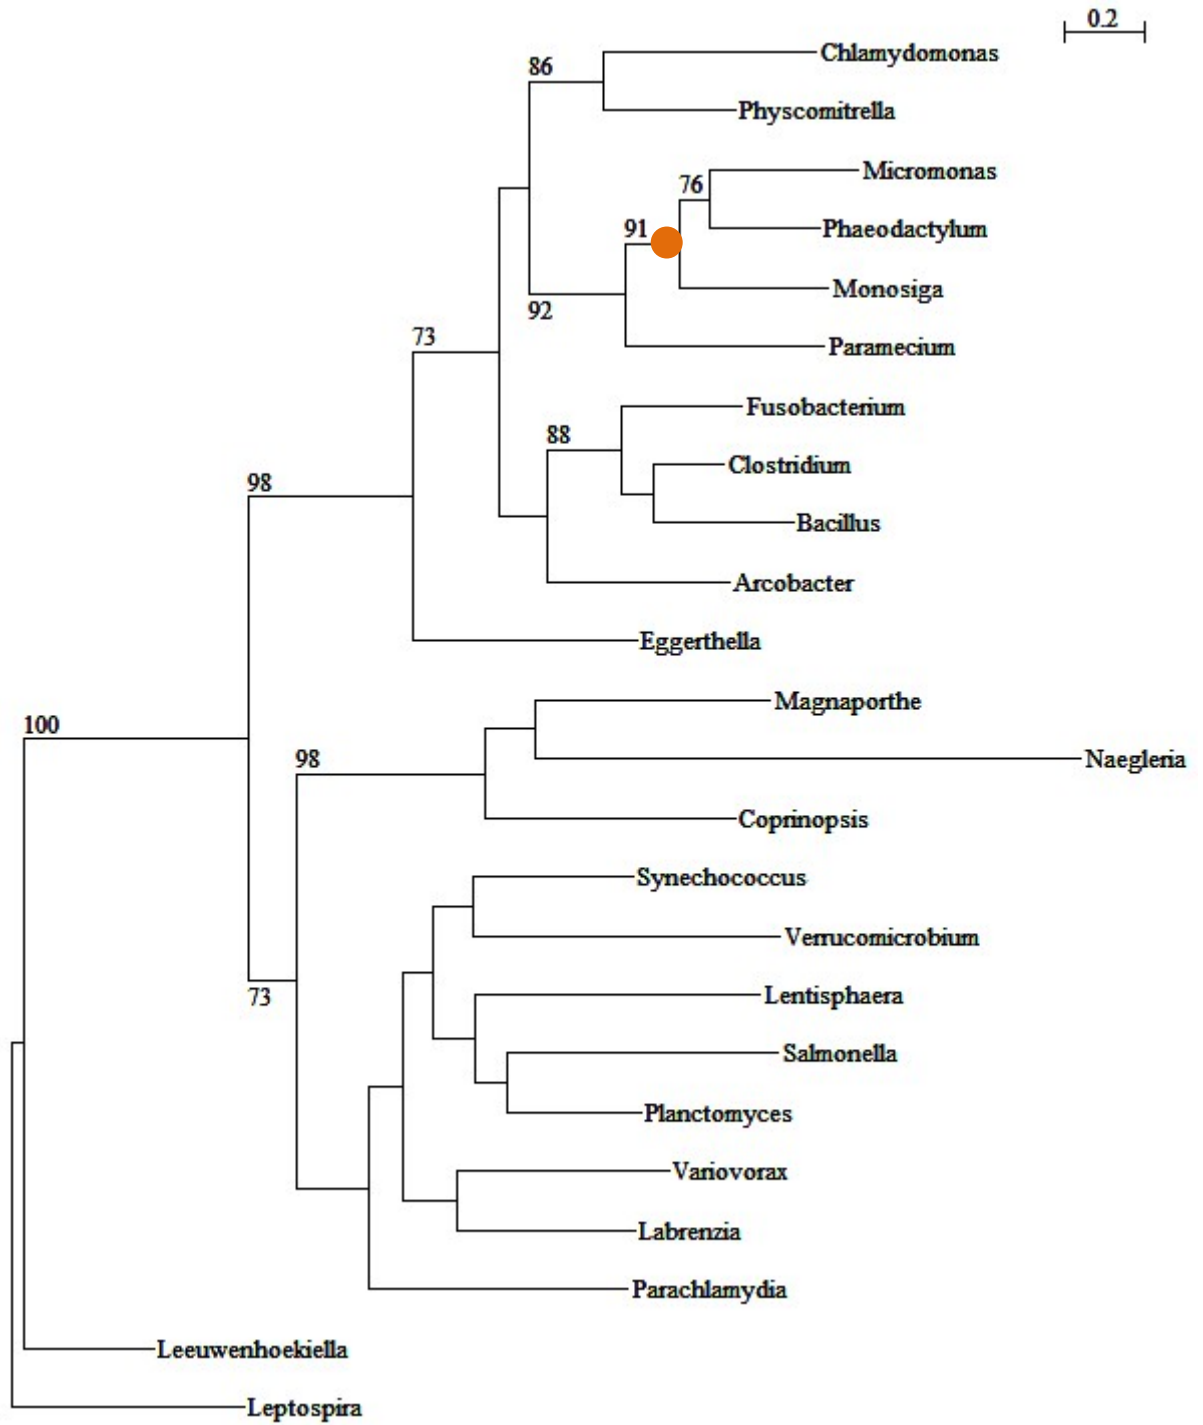

Figure S92. Phylogeny of pirin-related protein (GI No. 167538121).

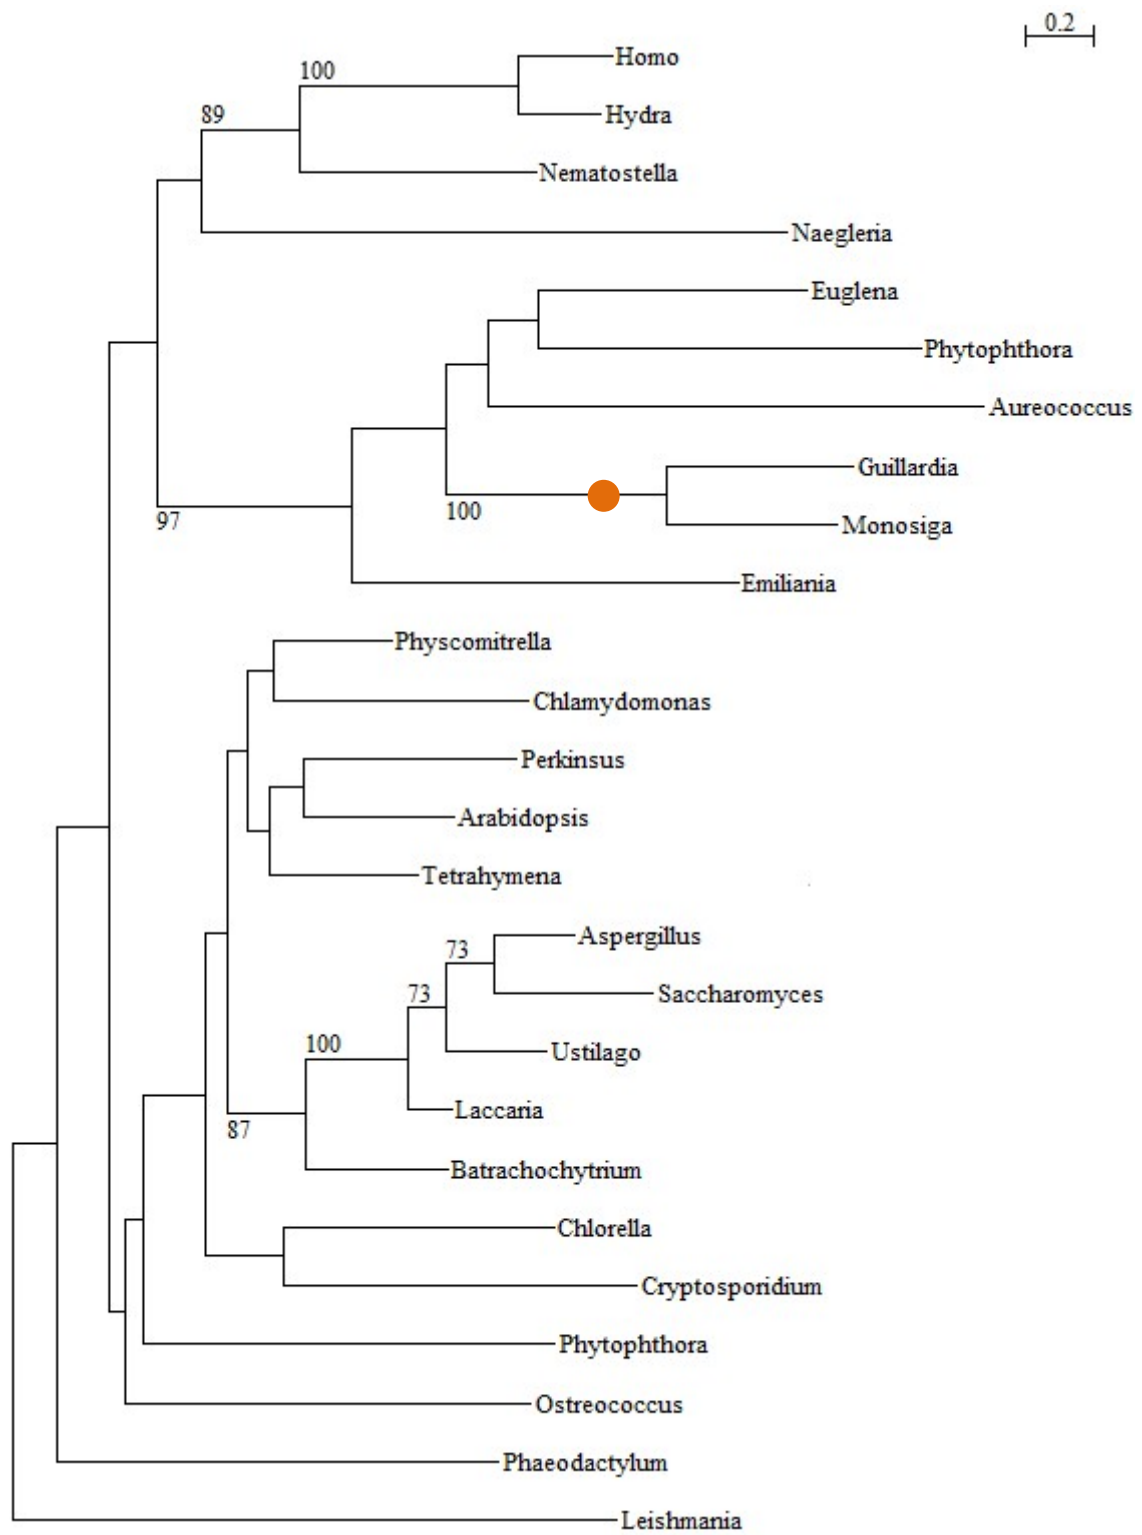

Figure S93. Phylogeny of one hypothetical protein (GI No. 167538169).

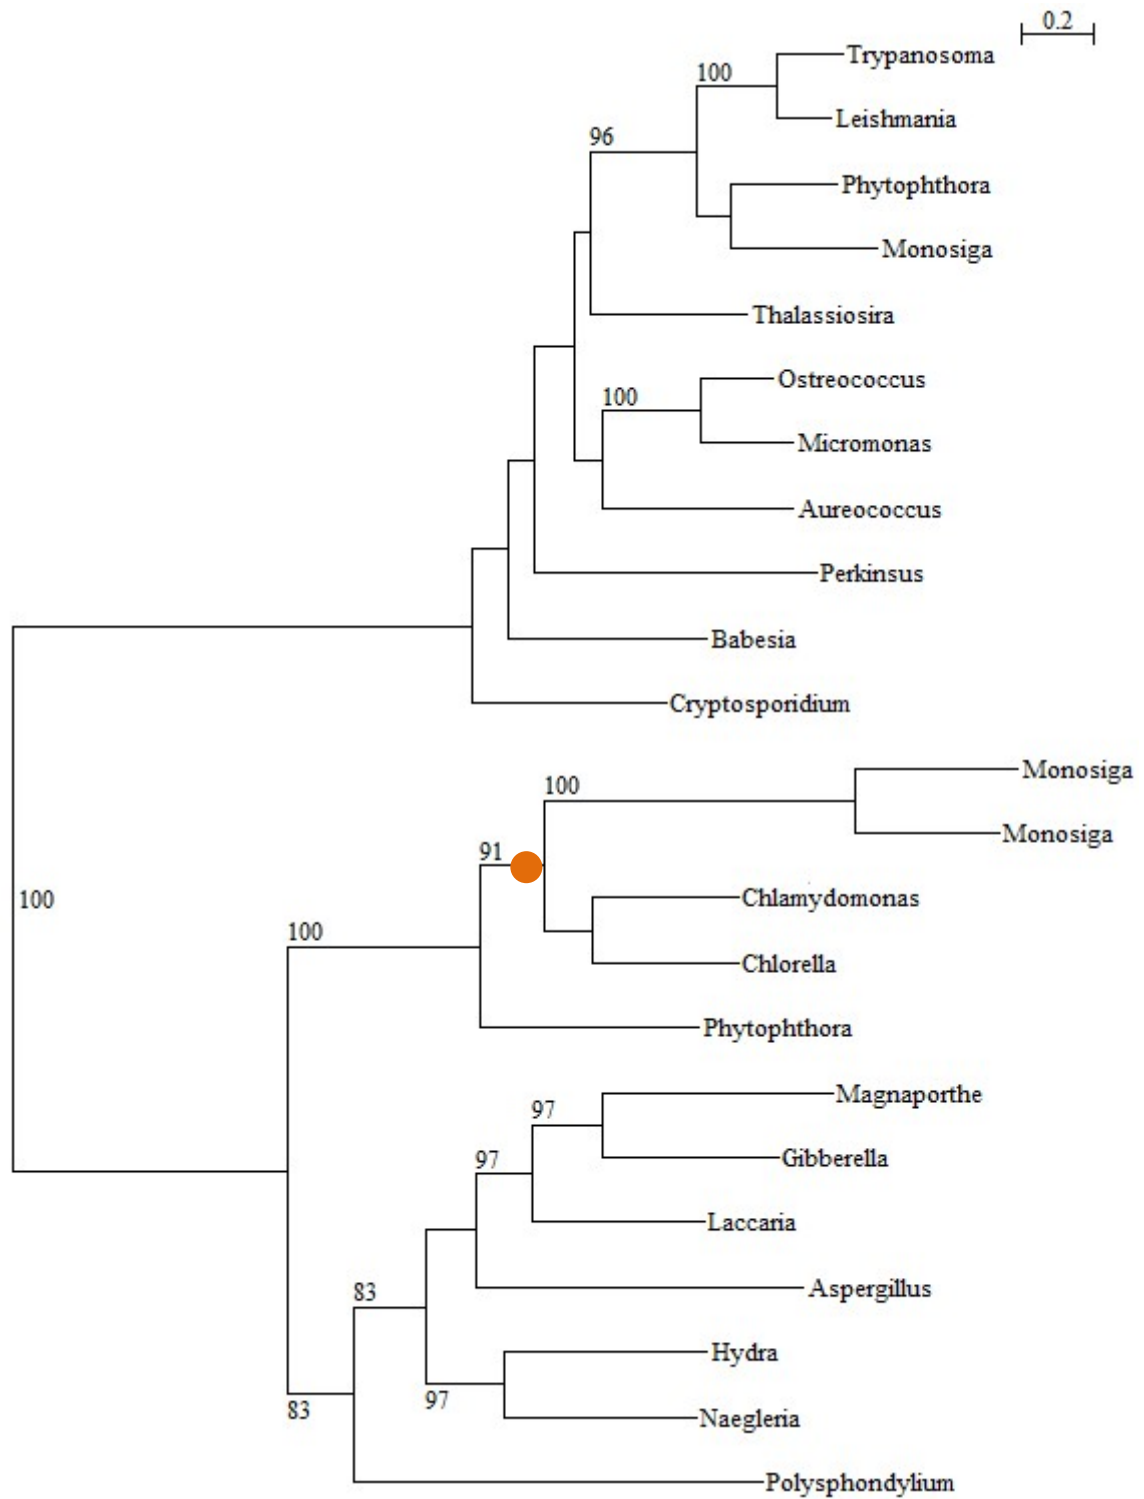

Figure S94. Phylogeny of one hypothetical protein (Gi No. 167515382 and 167538595).

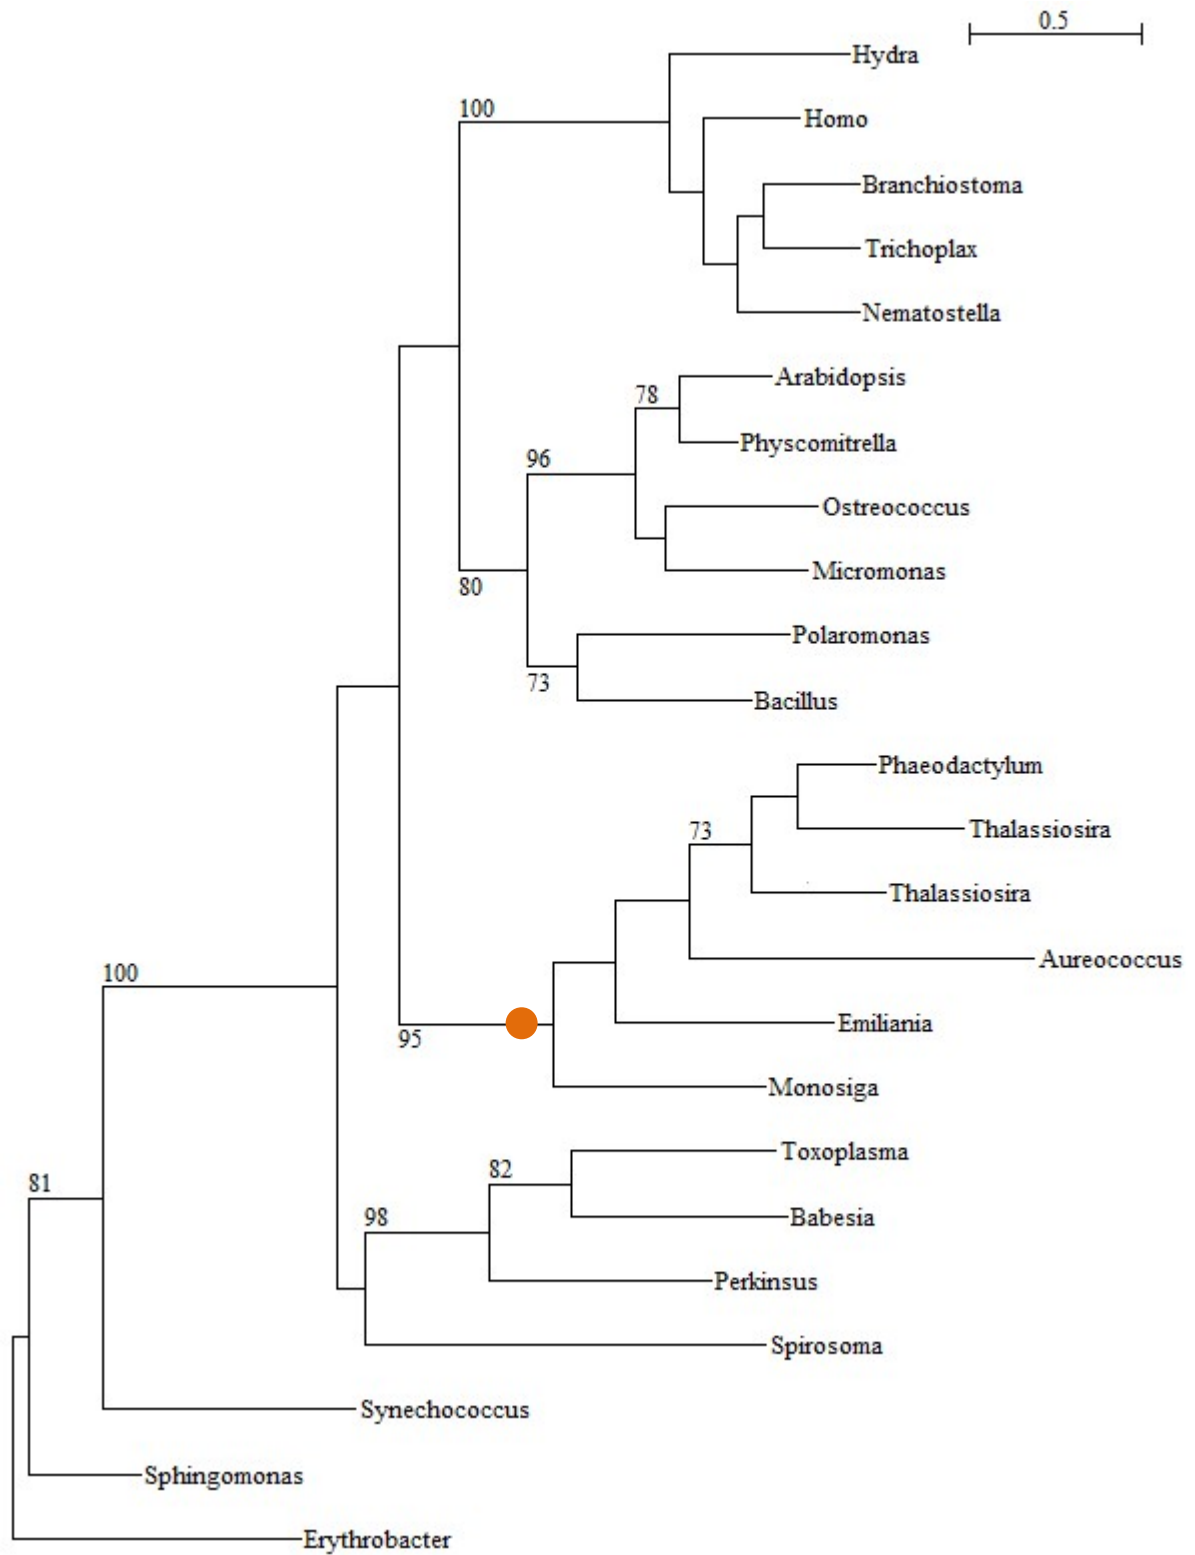

Figure S95. Phylogeny of prolyl 4-hydroxylase (GI No. 167524906).

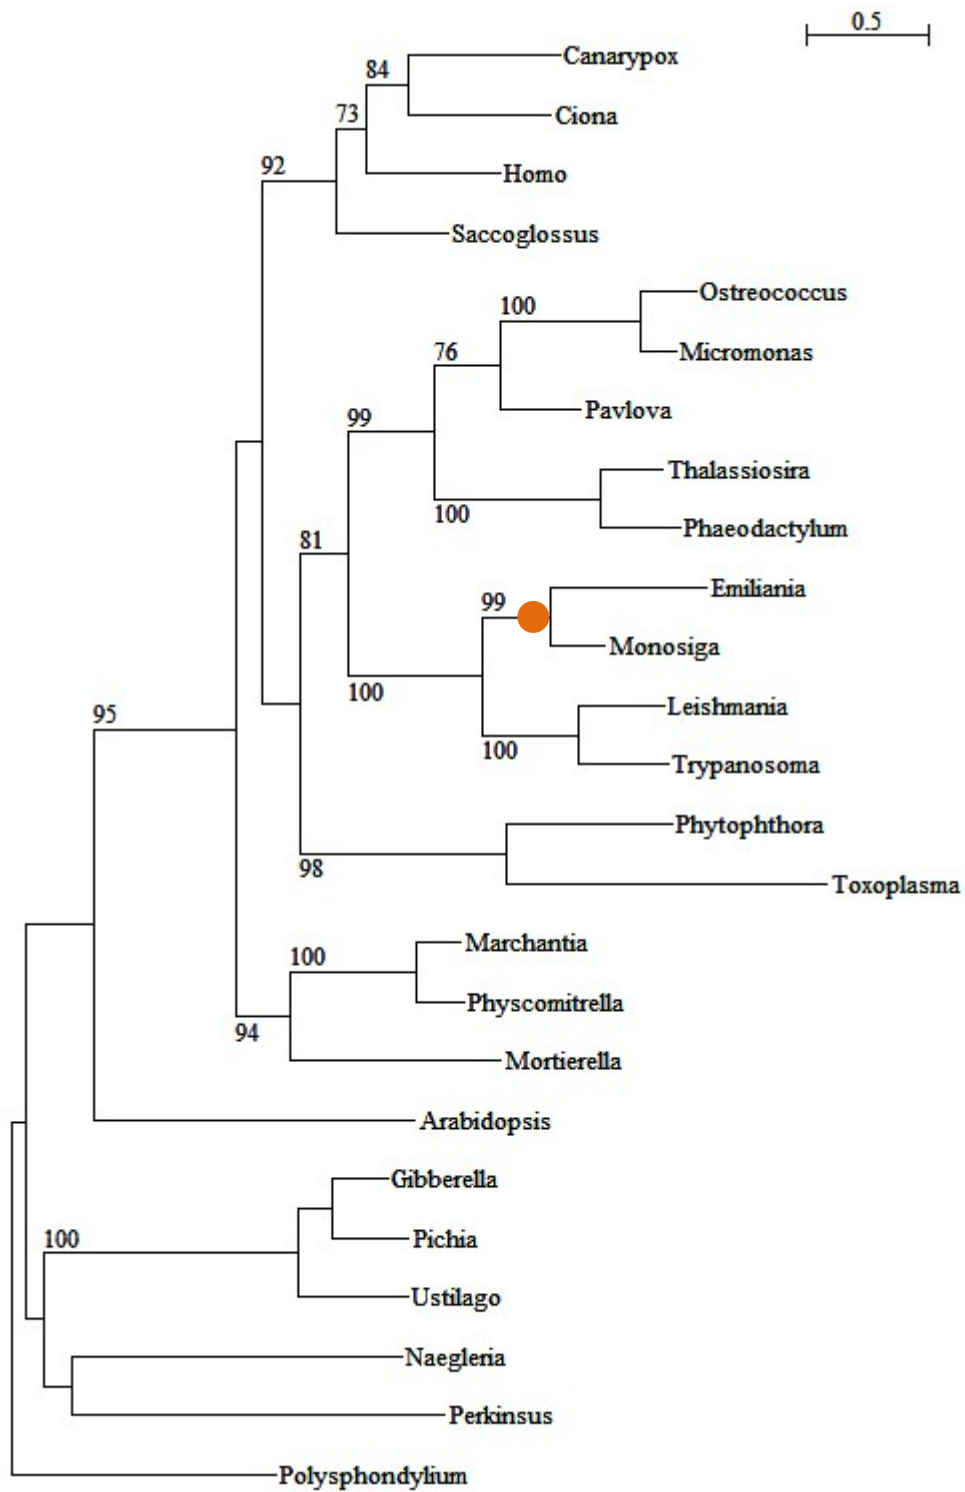

Figure S96. Phylogeny of fatty acid elongase (GI No. 167526168).



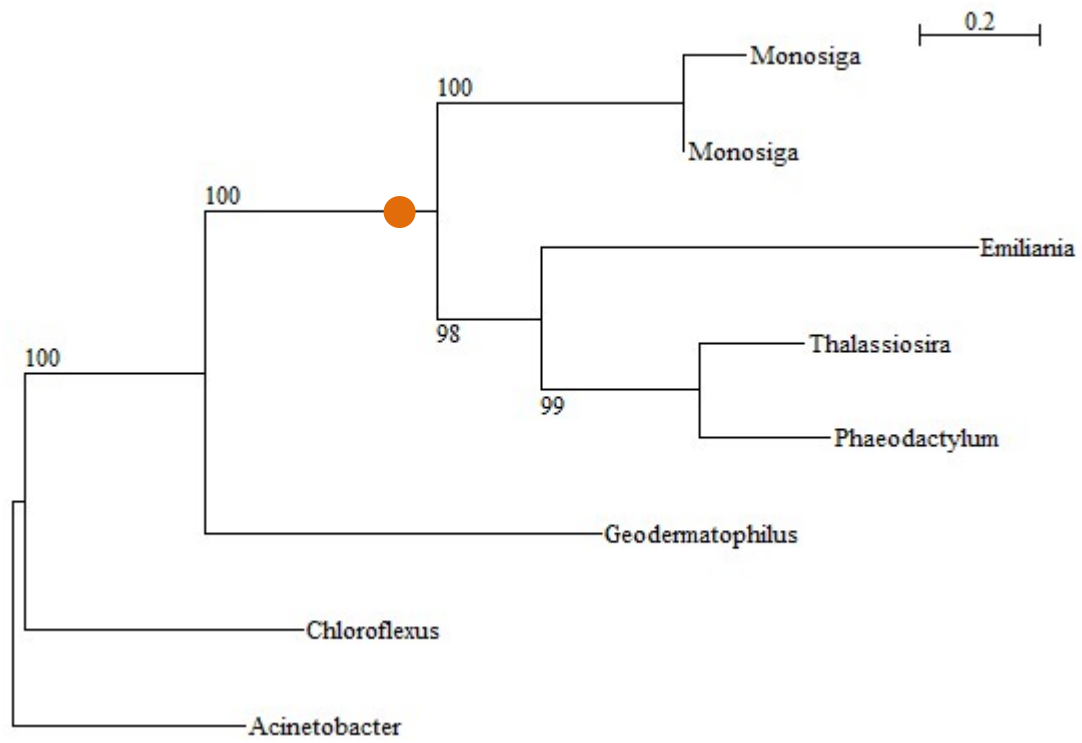

Figure S97. Phylogeny of one hypothetical protein (GI No. 167526275 and 167538724). Sequences of *Monosiga* and Chromists form a clade, and their close relationship is also supported by the shared characters in multiple sequence alignment.

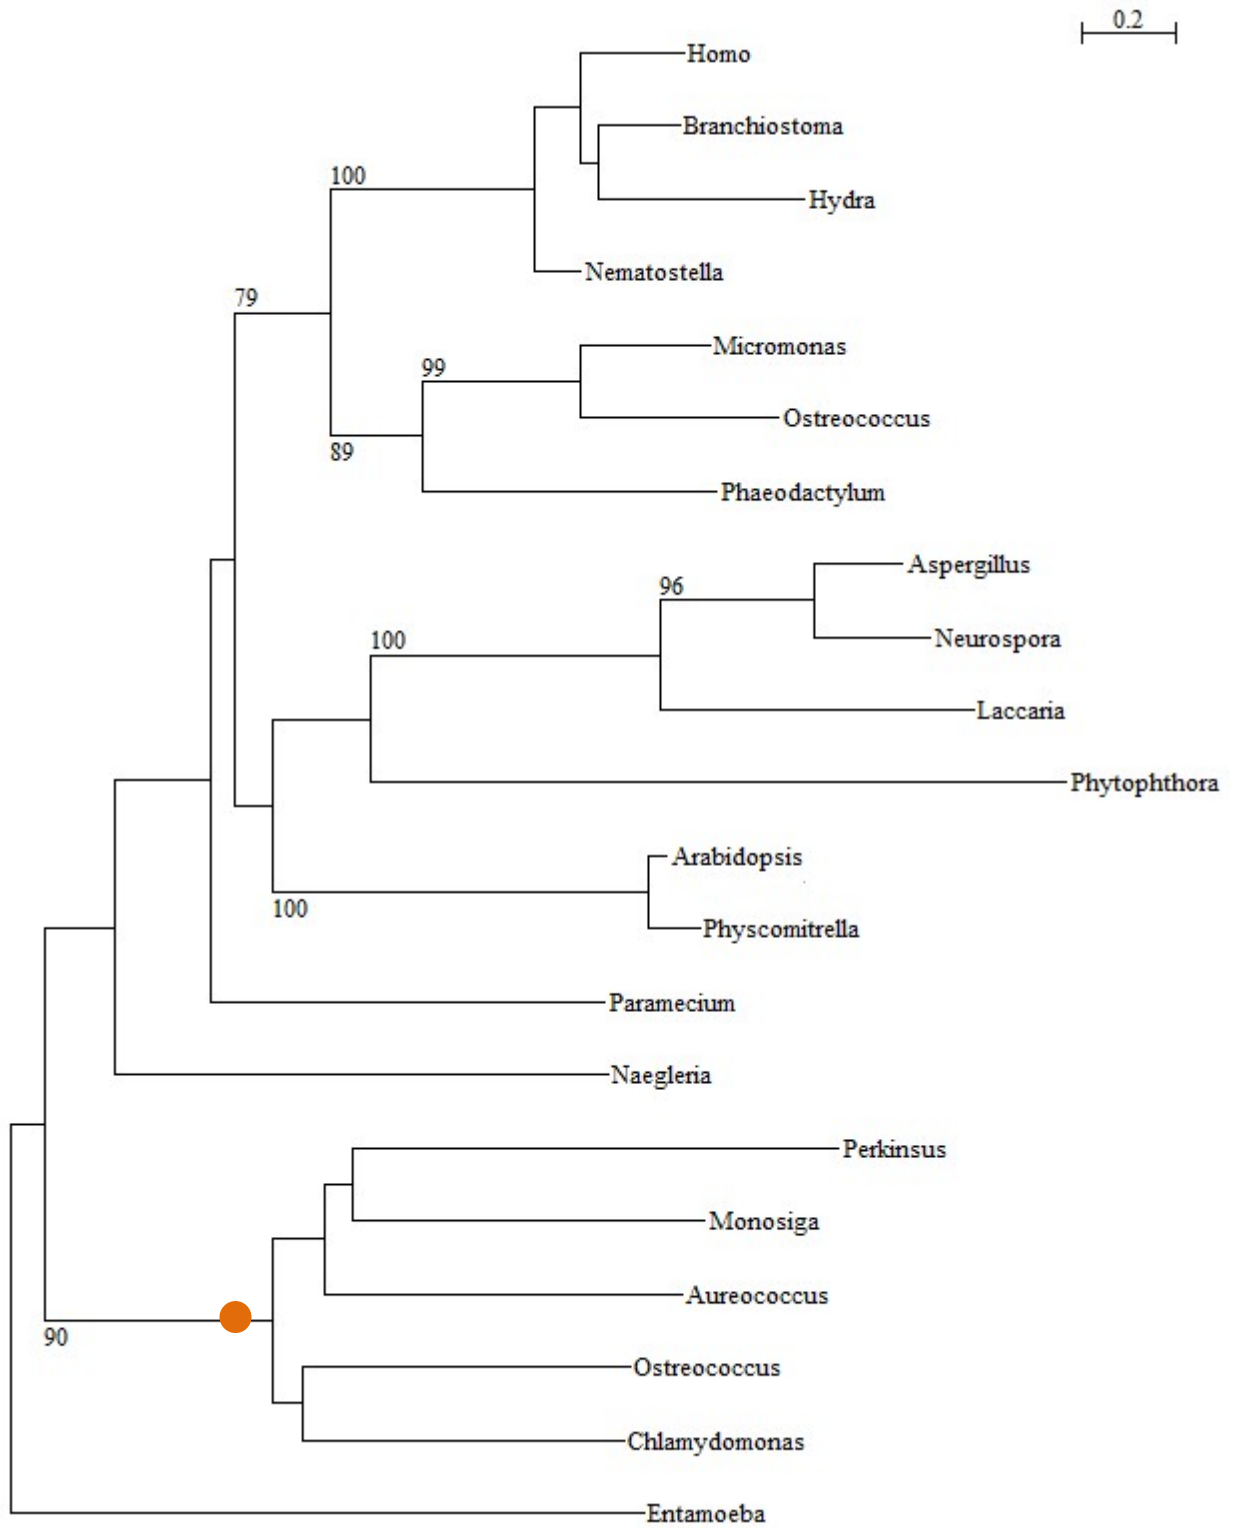

Figure S98. Phylogeny of cysteine protease (GI No. 167522705).

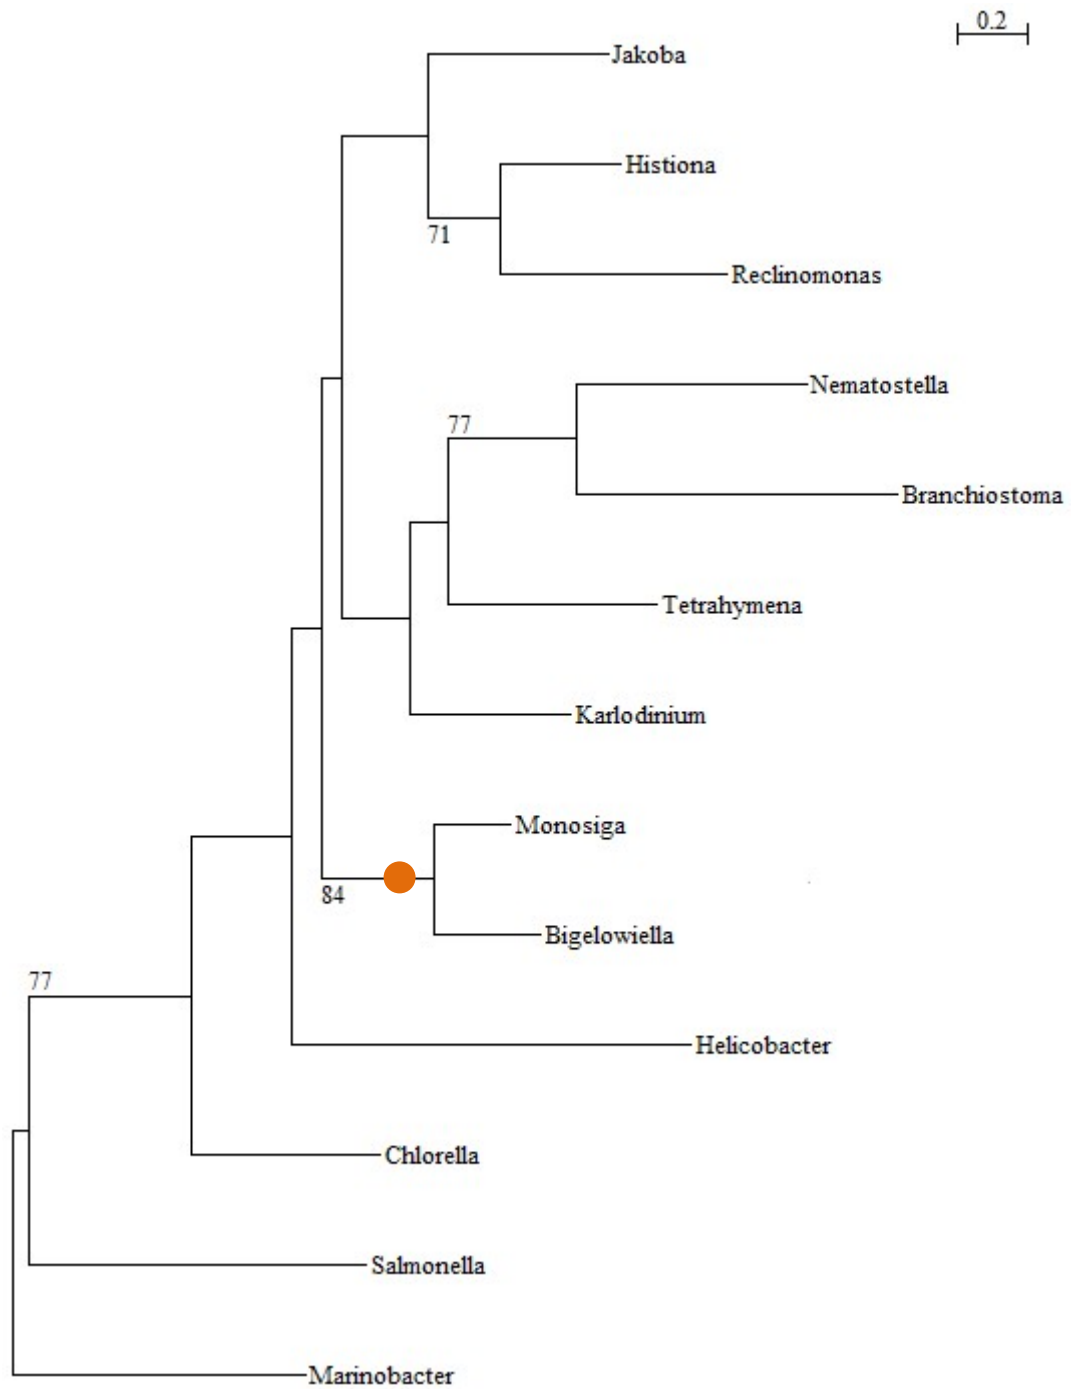

Figure S99. Phylogeny of one hypothetical protein (GI No. 167534439).

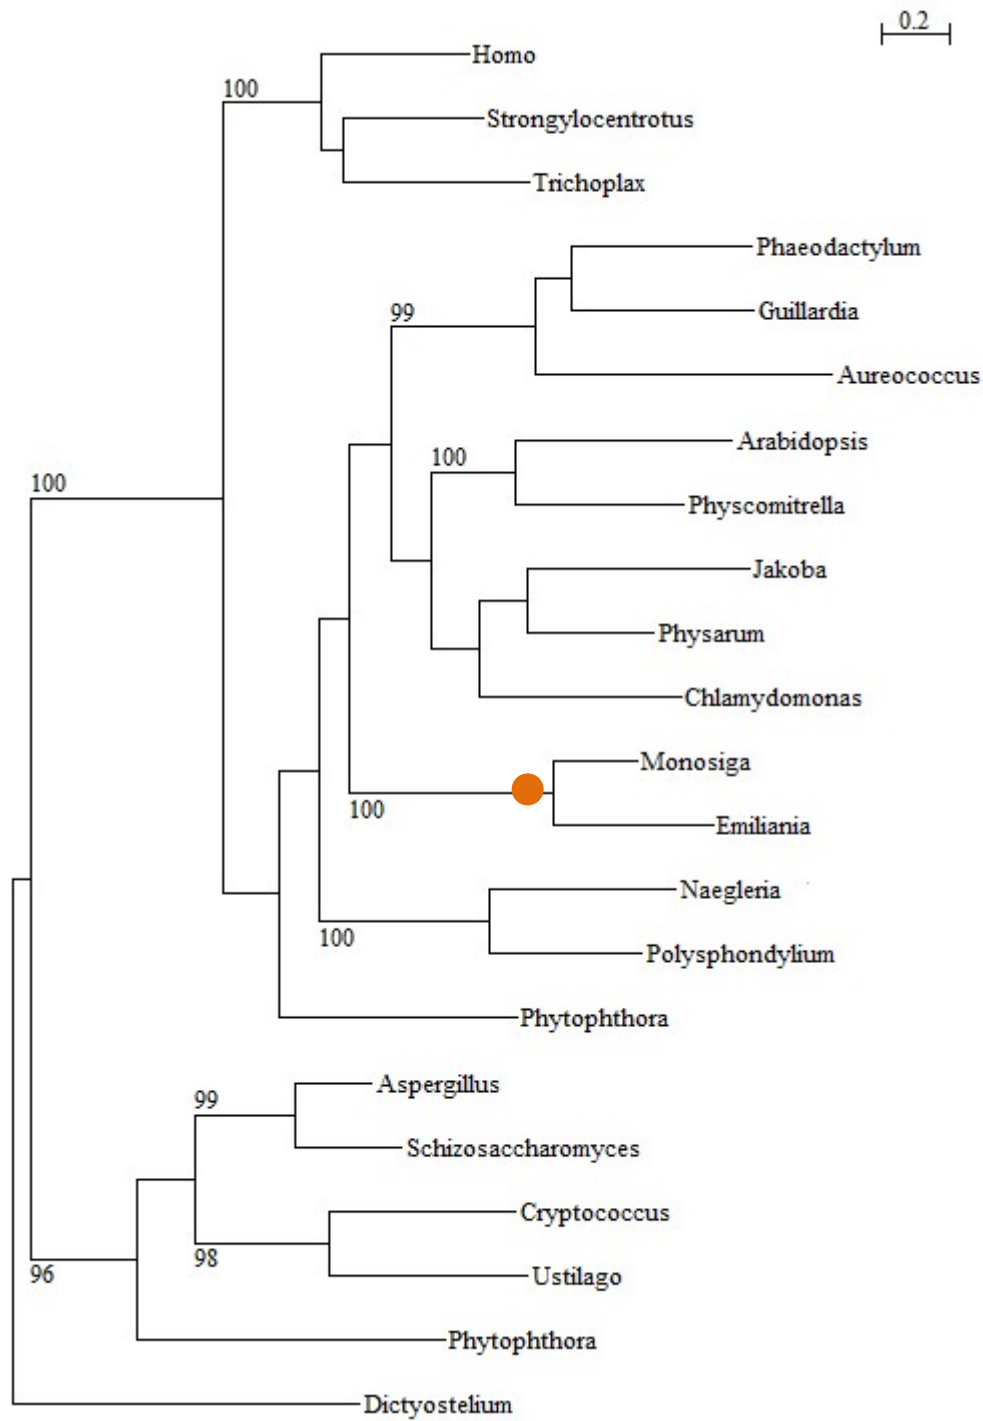

Figure S100. Phylogeny of serine carboxypeptidase (GI No. 167534625).

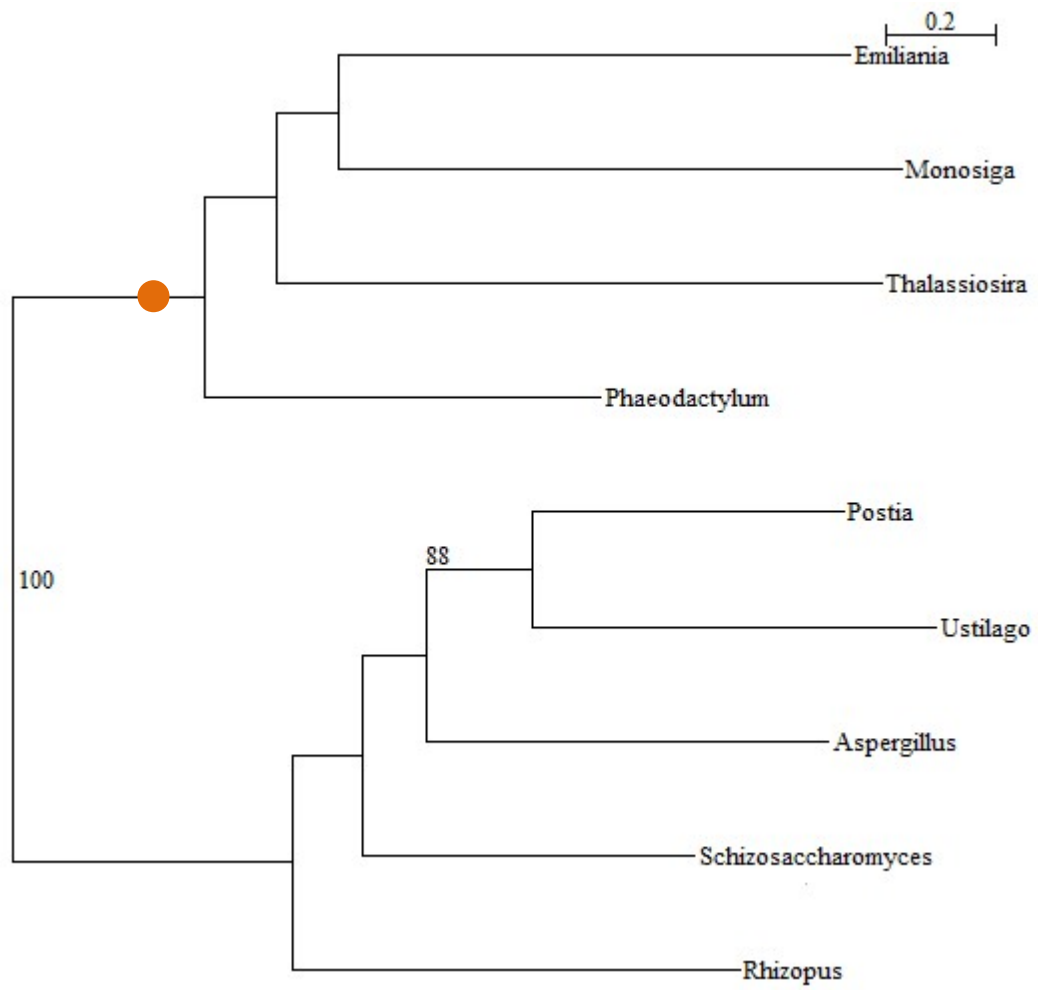

Figure S101. Phylogeny of Ser/Thr protein phosphatase (GI No. 167534824).

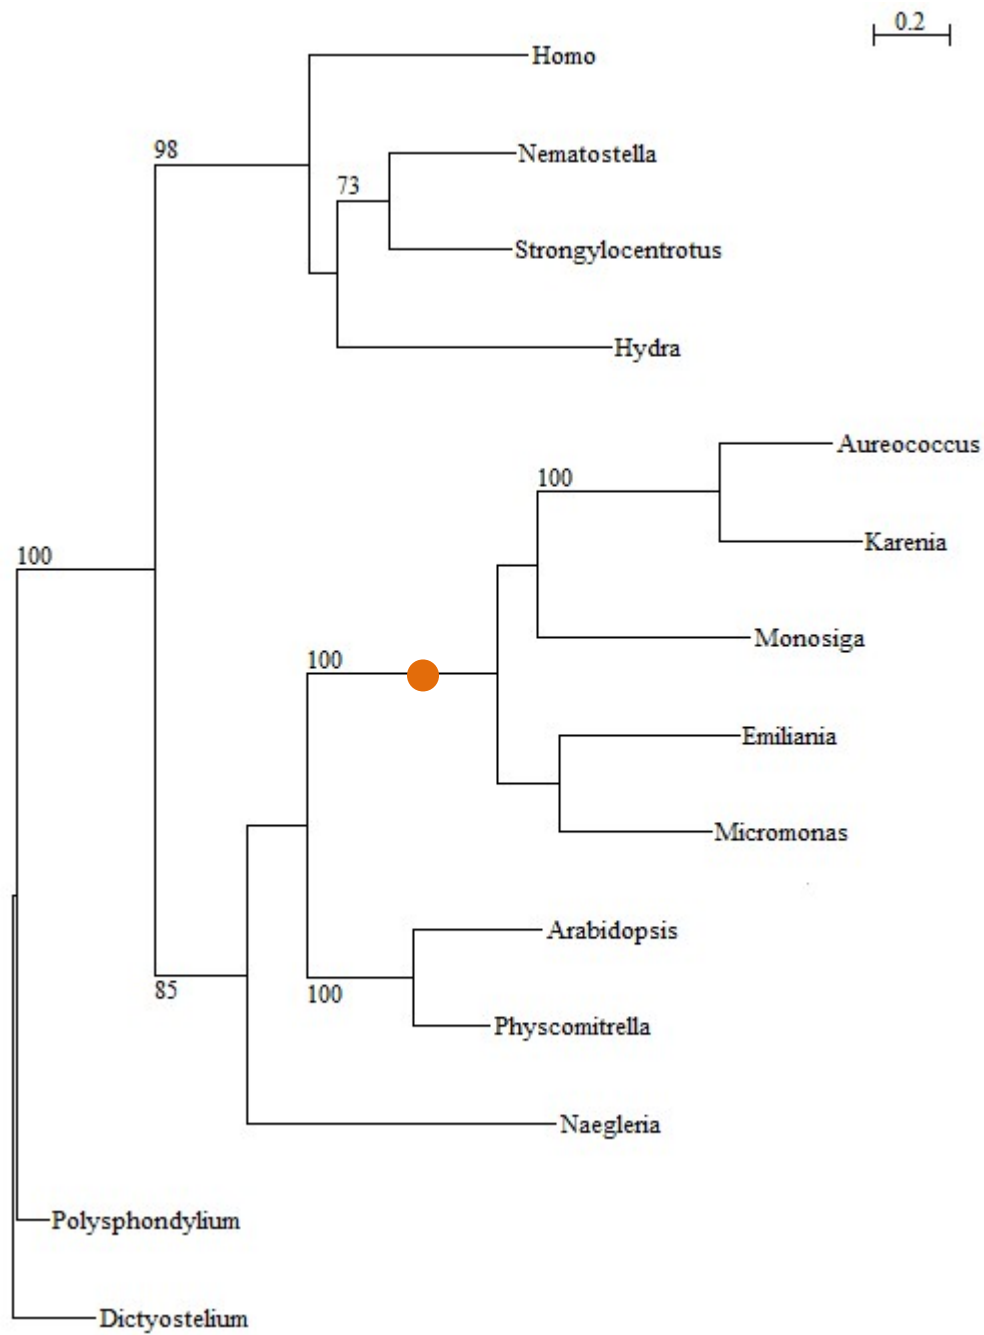

Figure S102. Phylogeny of 2OG-Fe (II) oxygenase (GI No. 167535670).

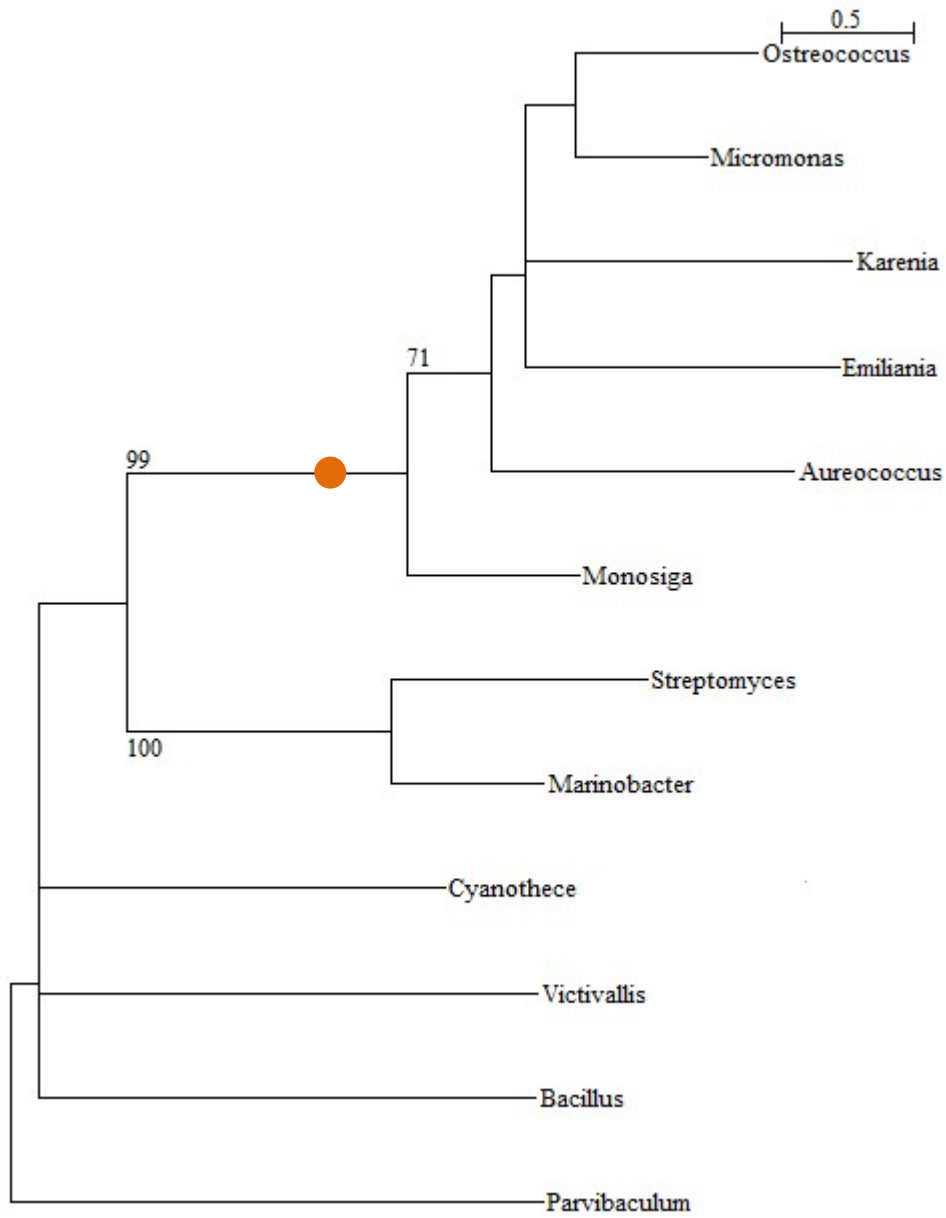

Figure S103. Phylogeny of one hypothetical protein (GI No. 167522493).

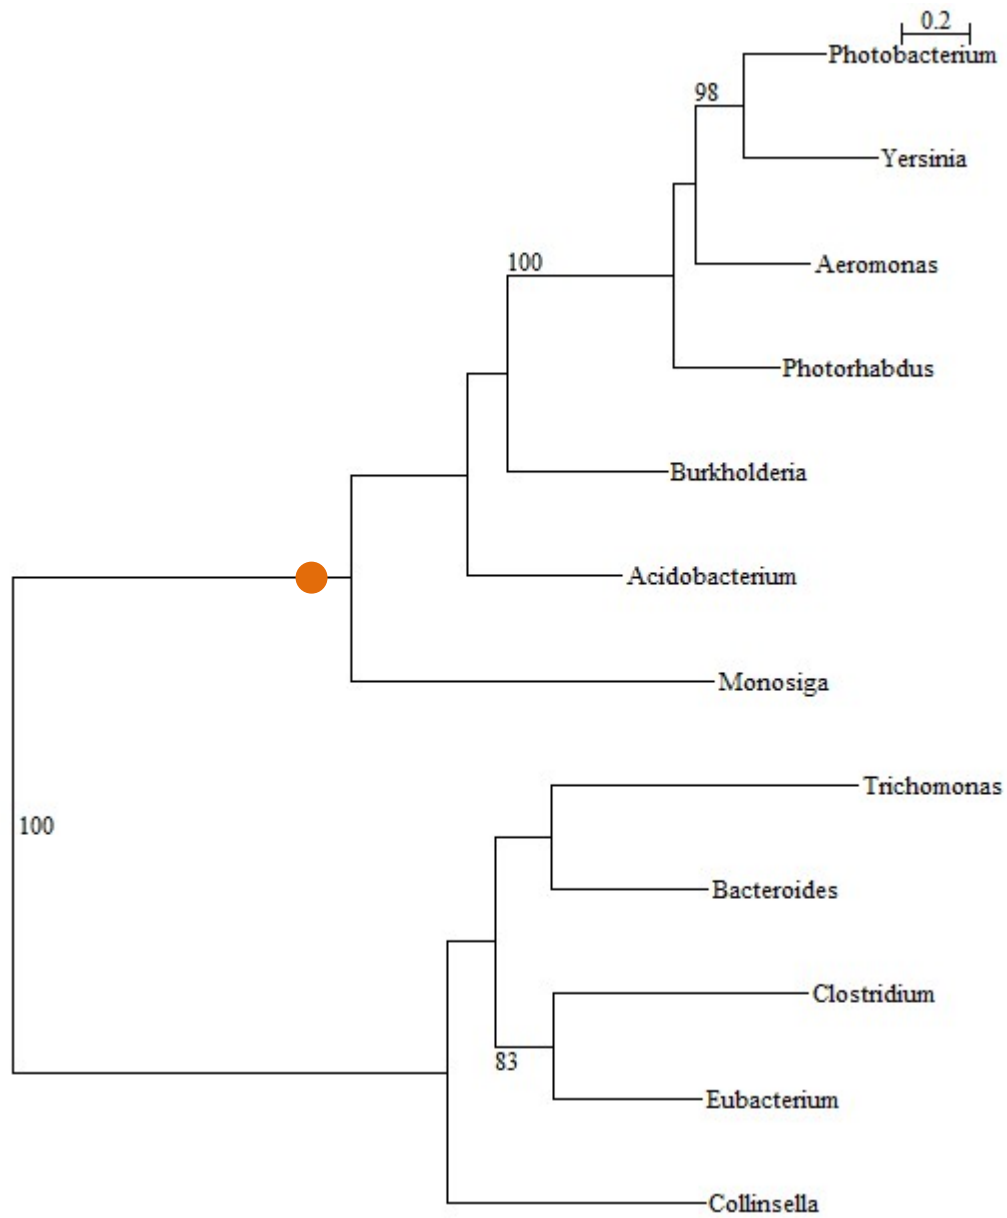

Figure S104. Phylogeny of enterotoxin (GI No. 167537376).



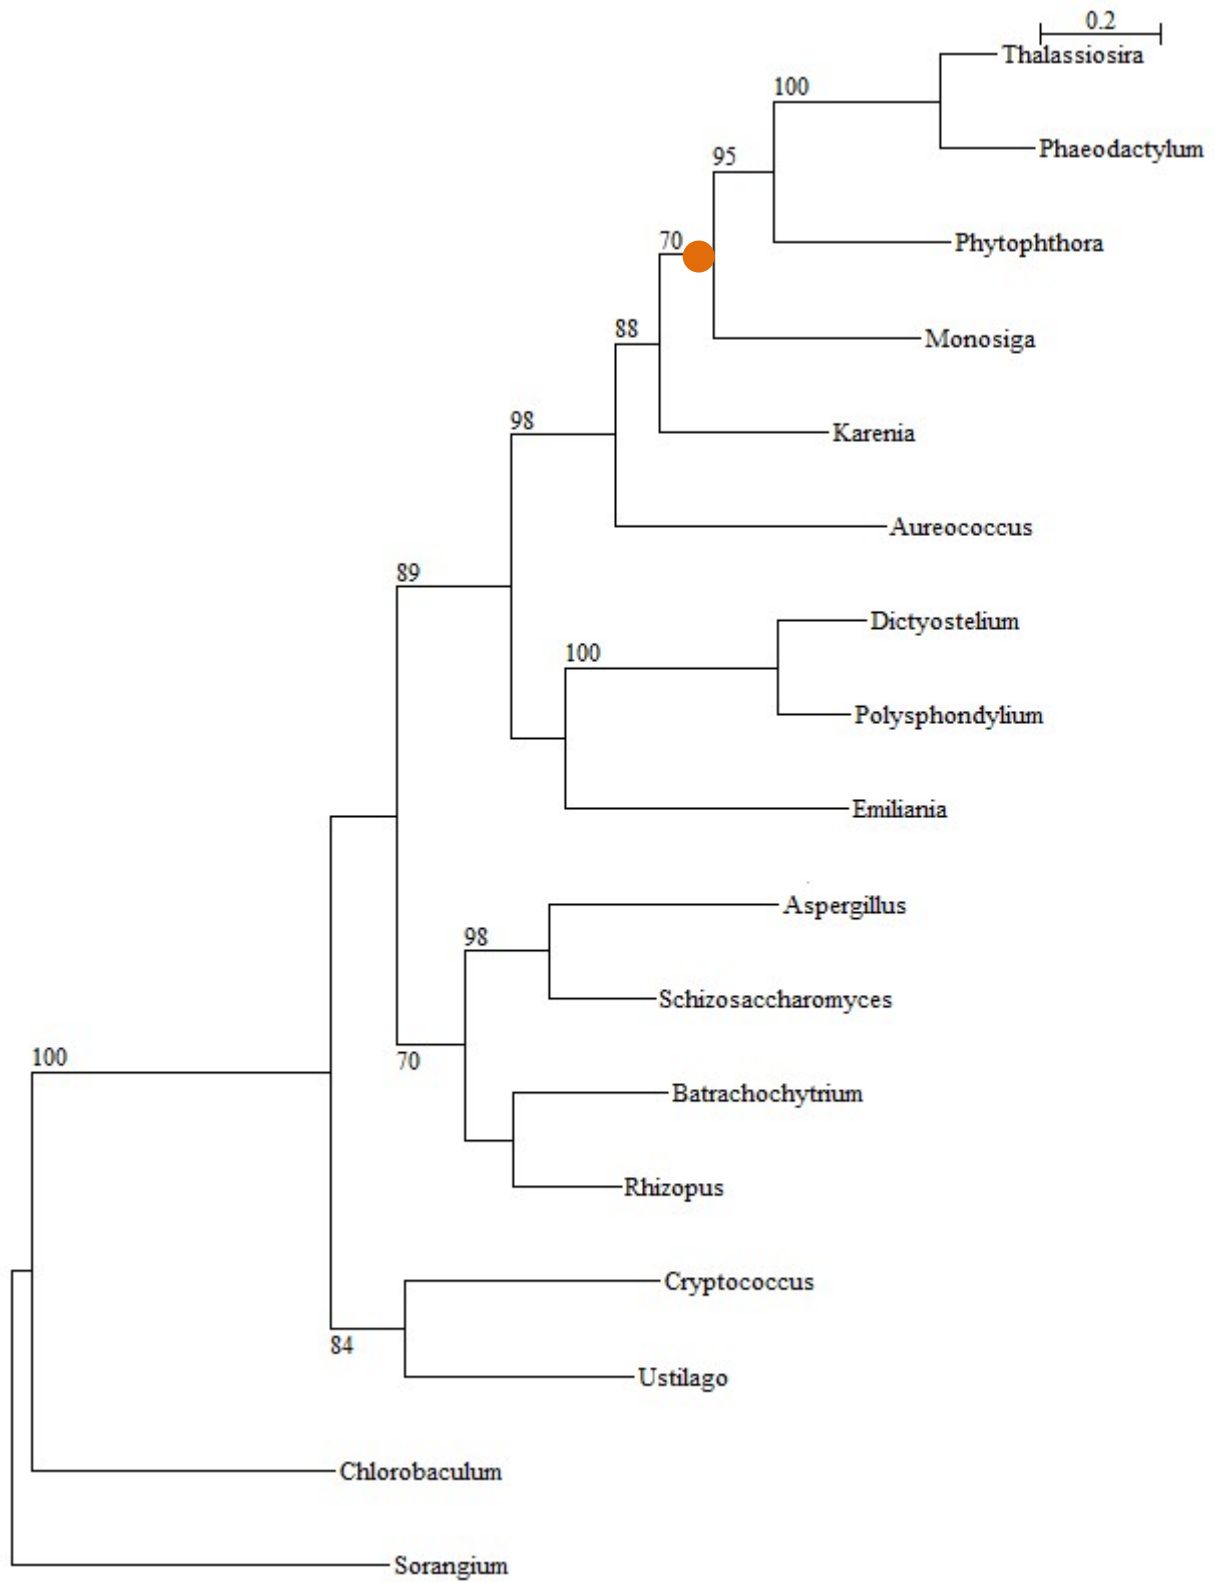

Figure S105. Phylogeny of methylenetetrahydrofolate dehydrogenase (GI No. 167523990).

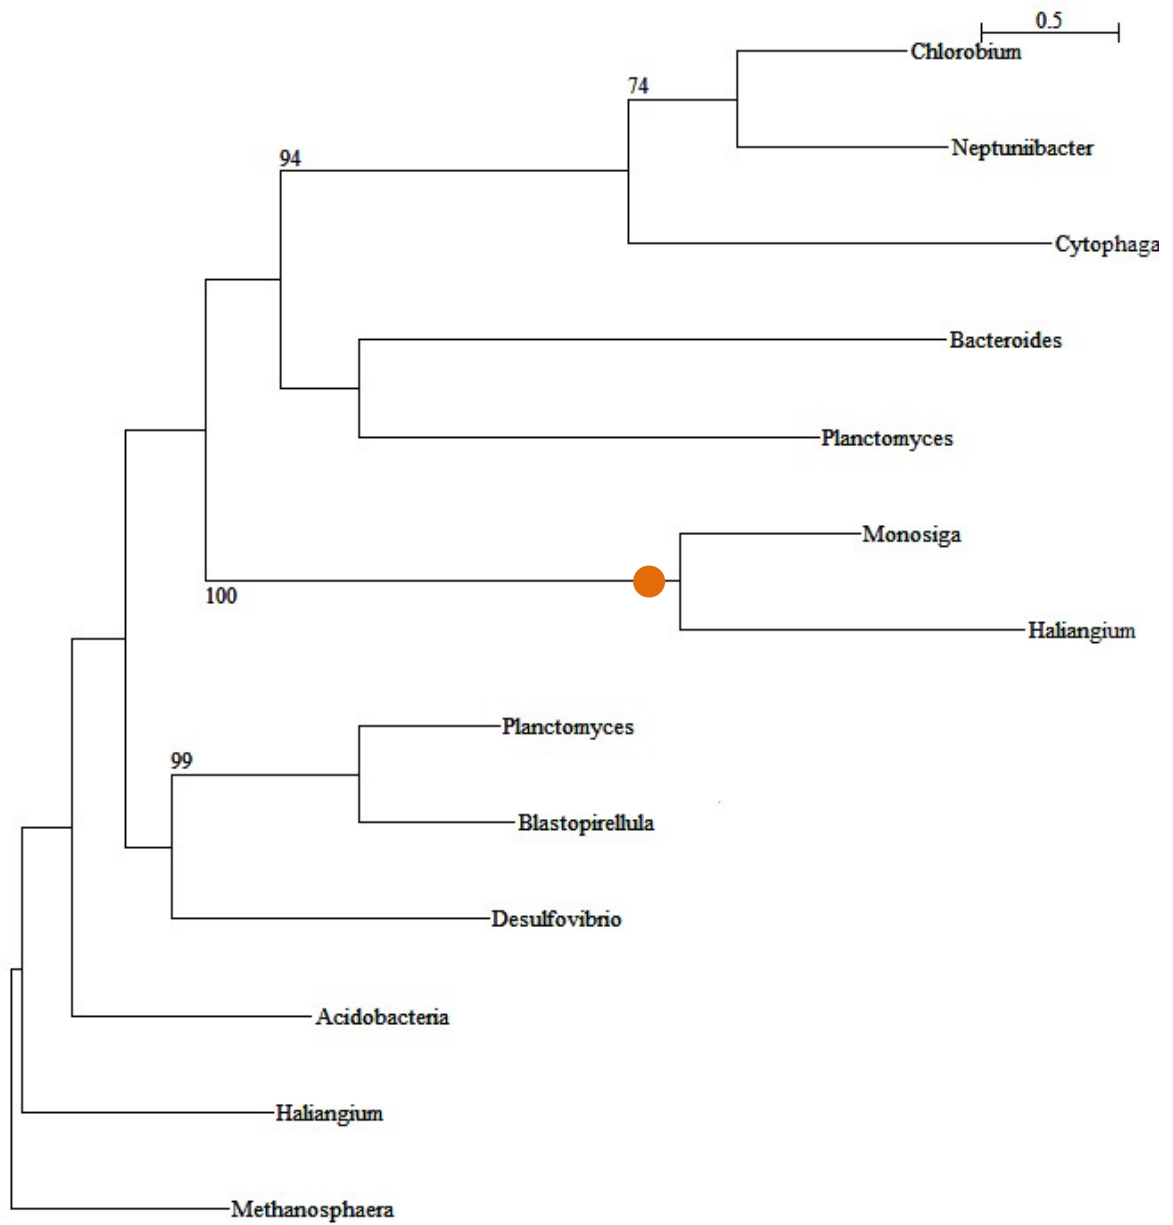

Figure S106. Phylogeny of glycosyltransferase (GI No. 167522307).

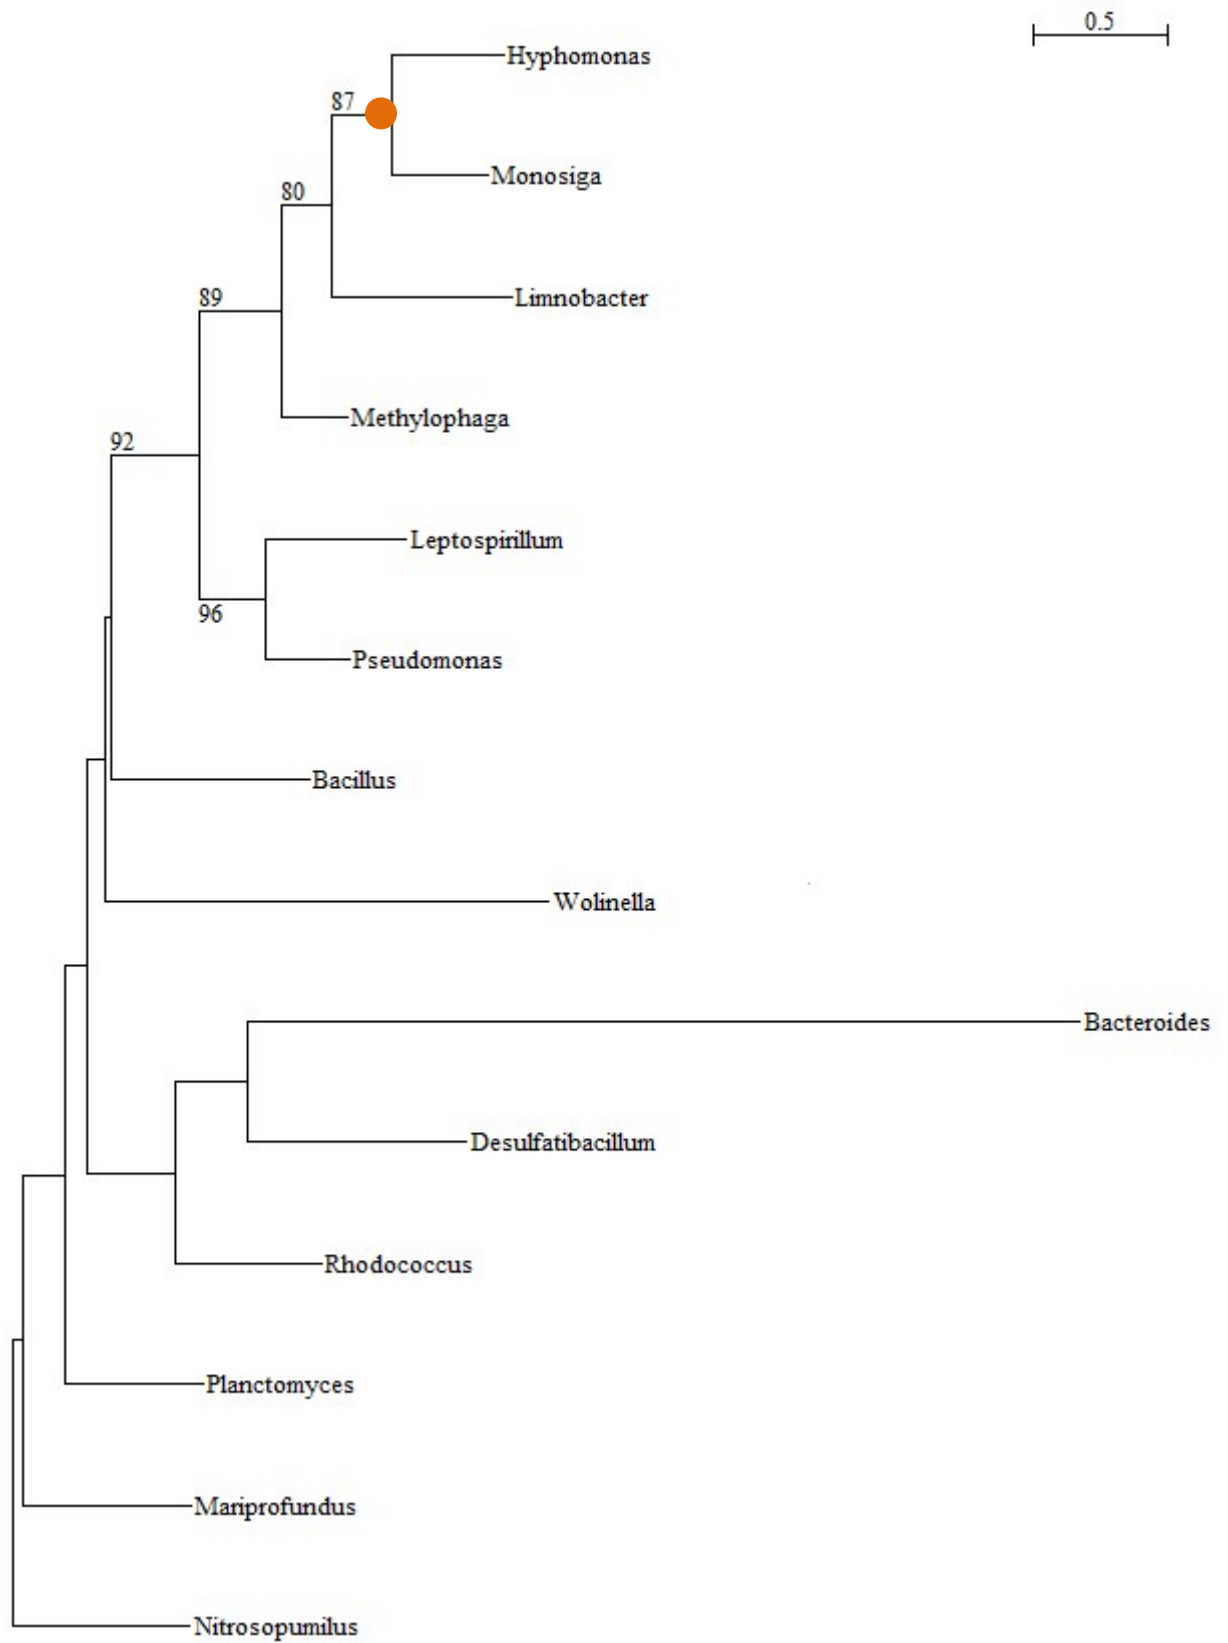

Figure S107. Phylogeny of L-2,4-diaminobutyric acid acetyltransferase (GI No. 167517491).

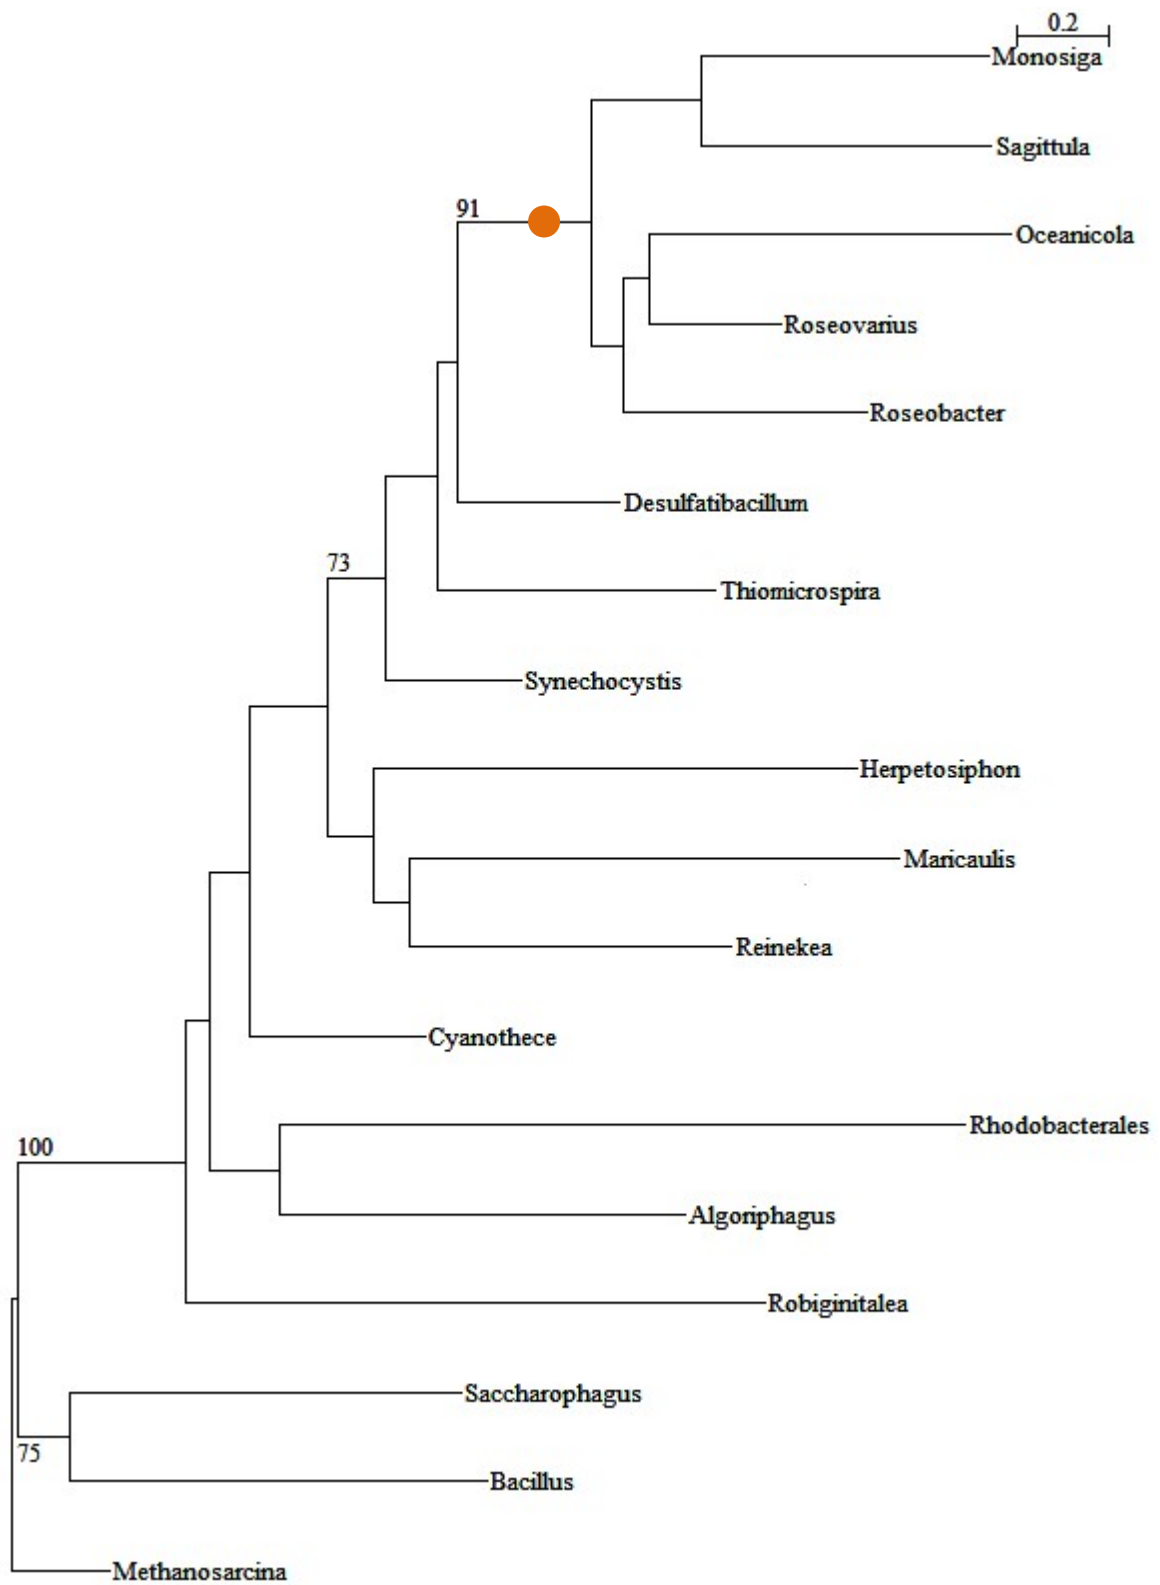

Figure S108. Phylogeny of one hypothetical protein (GI No. 167534872).

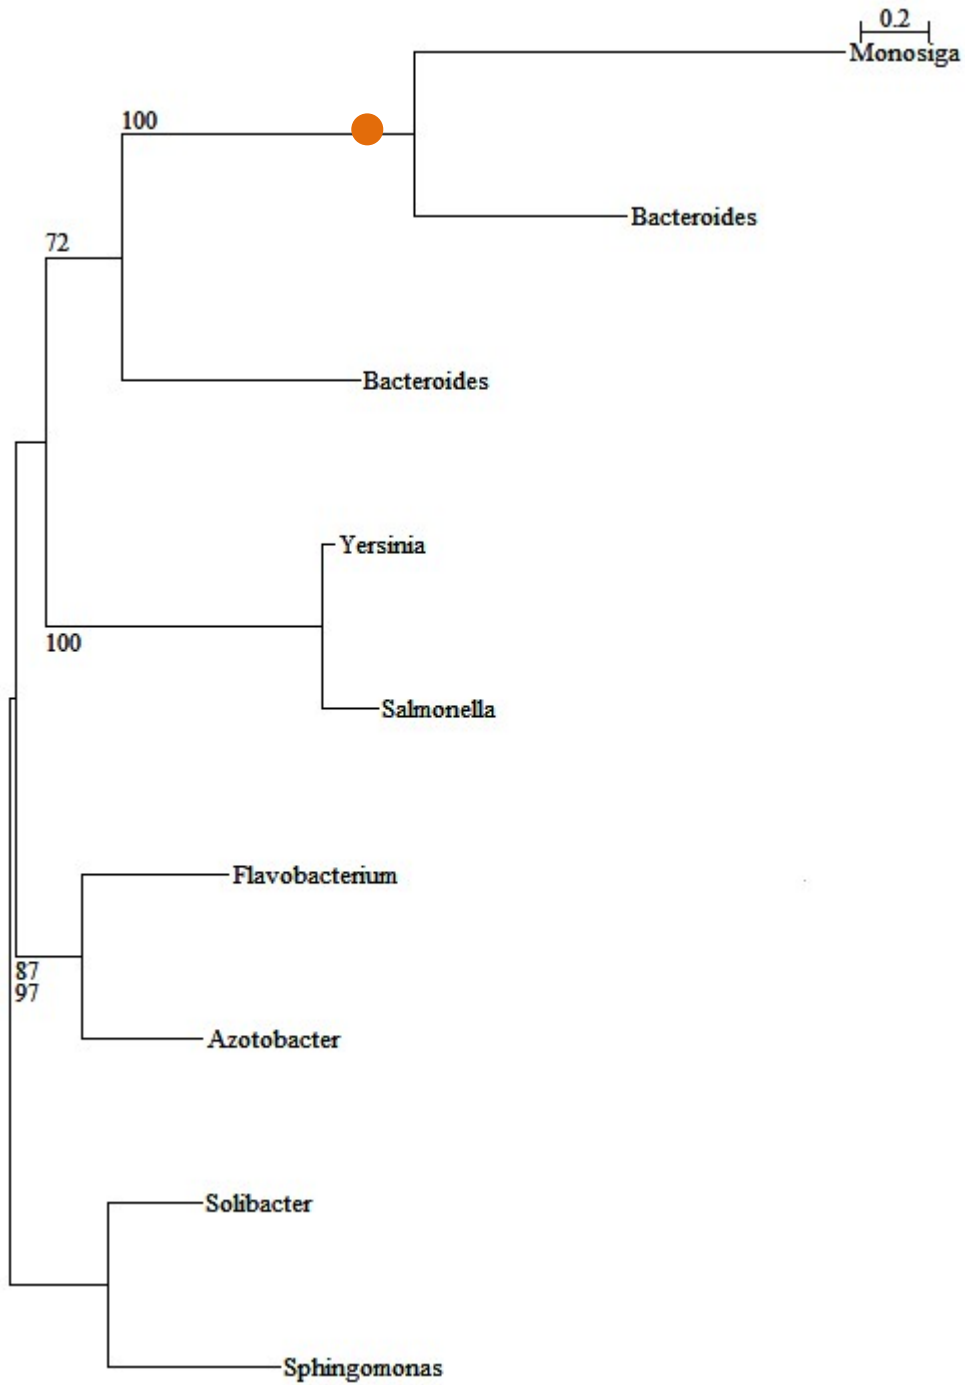

Figure S109. Phylogeny of rhamnose-proton symporter (GI No. 167515428).
